# Supplementary material for: Tetrahomo corona[4]arene-based spirophanes: synthesis, structure, and properties
Source: Royal Society of Chemistry journal article supplement (doi:10.1039/d3sc02417b), 2023-01-01
Supplement: d3sc02417b1.pdf [file d3sc02417b1.pdf]

*Electronic Supplementary Information for*  
**Tetrahydro Corona[4]arene-based Spirophanes:**  
**Synthesis, Structure, and Properties**

Shen-Yi Guo,<sup>a</sup> Zhuo-Ang Zhang,<sup>a</sup> Shuo Tong,<sup>\*a</sup> Qing-Hui Guo,<sup>b</sup> Rui-Mao Hua,<sup>a</sup> and  
Mei-Xiang Wang<sup>\*a</sup>

<sup>a</sup> Key Laboratory of Bioorganic Phosphorus Chemistry and Chemical Biology (MOE),  
Department of Chemistry, Tsinghua University, Beijing 100084, China.

<sup>b</sup> Stoddart Institute of Molecular Science, Department of Chemistry, Zhejiang  
University, Hangzhou, 310027, China

E-mail: [wangmx@mail.tsinghua.edu.cn](mailto:wangmx@mail.tsinghua.edu.cn); [tongshuo@mail.tsinghua.edu.cn](mailto:tongshuo@mail.tsinghua.edu.cn)

**Table of Contents**

|                                                                                     |    |
|-------------------------------------------------------------------------------------|----|
| 1. General Information .....                                                        | 2  |
| 2. Experimental Procedures and Characterization of Products .....                   | 3  |
| 2.1 Synthesis of dibromide intermediates <b>4</b> and <b>5</b> .....                | 3  |
| 2.2 Synthesis of homo <i>i</i> -corona[4]arenes <b>7a-f</b> and <b>8</b> .....      | 6  |
| 2.3 Synthesis of ditopic spirophanes <b>15</b> and <b>16</b> .....                  | 12 |
| 2.4 Synthesis of intermediates <b>19-22</b> .....                                   | 19 |
| 2.5 Synthesis of bispirophanes <b>23-26</b> .....                                   | 24 |
| 3. Molecular Structures and Crystallographic Data.....                              | 28 |
| 3.1 Molecular structures of homo <i>i</i> -corona[4]arenes .....                    | 29 |
| 3.2 Molecular structures of bispirophanes .....                                     | 34 |
| 3.3 Molecular structures of complexation of spirophanes and tetrathiafulvalene..... | 38 |
| 3.4 Molecular structures of enantiopure macrocycles.....                            | 42 |
| 3.5 Crystallographic data .....                                                     | 43 |
| 4. HPLC Resolution of Chiral Macrocycles .....                                      | 60 |
| 5. Photophysical Data .....                                                         | 72 |
| 5.1 UV-vis and fluorescence spectra.....                                            | 72 |
| 5.2 CD and CPL spectra.....                                                         | 76 |
| 6. References .....                                                                 | 85 |
| 7. Copies of NMR Spectra.....                                                       | 85 |

## 1. General Information

**Materials and Methods:** Reagents and solvents were used as received. Glassware was dried in an oven ( $T = 120\text{ }^{\circ}\text{C}$ ). Anhydrous solvents were dried by shaking with 4A molecular sieves. TLC analysis was performed on pre-coated, glass-backed silica gel plates and visualized with UV light. The silica gel (200-300 mesh) flash column chromatography was used.

**Characterization:**  $^1\text{H}$ ,  $^{13}\text{C}$ , and  $^{19}\text{F}$  NMR spectra were recorded on a 400 MHz NMR spectrometer at 298 K. Chemical shifts were reported in ppm with either tetramethylsilane or the residual solvent resonance used as an internal standard. Abbreviations are used in the description of NMR data as follows: chemical shift ( $\delta$ , ppm), multiplicity (s = singlet, d = doublet, t = triplet, q = quadruplet), coupling constant ( $J$ , Hz). Infrared spectra were recorded using an FT-IR spectrometer with KBr pellets in the 4000-400  $\text{cm}^{-1}$  region. The high-resolution mass spectra (HRMS) were recorded using a GCT-MS spectrometer, a microTOF-Q spectrometer or a MALDI-FT-ICR mass spectrometer. All yields reported were isolated yields. Crystallographic data were collected on a Rigaku XtaLAB Synergy (Cu) X-ray single crystal diffractometer. Melting points were uncorrected.

**Chiral Chemistry:** Resolution of racemic compounds and determination of enantiomeric excesses were carried out by HPLC using Daicel chiral stationary phase columns by comparing the samples with the appropriate racemic samples at 25  $^{\circ}\text{C}$ , column and elution details specified in each entry. The optical rotation was determined by Rudolph Autopol VI Automatic polarimeter. UV-vis absorption spectra were recorded using an Agilent® Cary-5000 UV-vis spectrophotometer at room temperature. Electronic circular dichroism (ECD) spectra were recorded on a JASCO J-815 spectropolarimeter at room temperature in a 1 cm-cuvette. Fluorescence spectra were recorded using an Agilent® Eclipse fluorescence spectrophotometer. Fluorescence quantum yields  $\phi$  were measured in diluted solution with an optical density lower than 0.05 using the following equation:

$$\frac{\phi_x}{\phi_r} = \frac{A_r(\lambda)}{A_x(\lambda)} \times \frac{n_x^2}{n_r^2} \times \frac{F_x}{F_r}$$

Where  $A$  is the absorbance at the excitation wavelength ( $\lambda$ ),  $n$  the refractive index, and

$F$  the integrated intensity.  $r$  and  $x$  stand for reference and sample respectively. The fluorescence quantum yields were measured in solution relative quinine sulfate ( $\phi = 57.7\%$  in  $0.1 \text{ M H}_2\text{SO}_4$ )<sup>[1]</sup> and Rhodamine B ( $\phi = 65.0\%$  in ethanol)<sup>[2]</sup>. Excitation of reference and sample compounds was performed at 350 nm or 520 nm.

## 2. Experimental Procedures and Characterization of Products

Preparation of **6a**<sup>[3]</sup>, **6b**<sup>[3]</sup>, **11**<sup>[4]</sup>, and **SI-2**<sup>[5]</sup> were carried out following the procedure reported in literature.

### 2.1 Synthesis of dibromide intermediates **4** and **5**

**Procedure A: Synthesis of **4a** and **5**:**

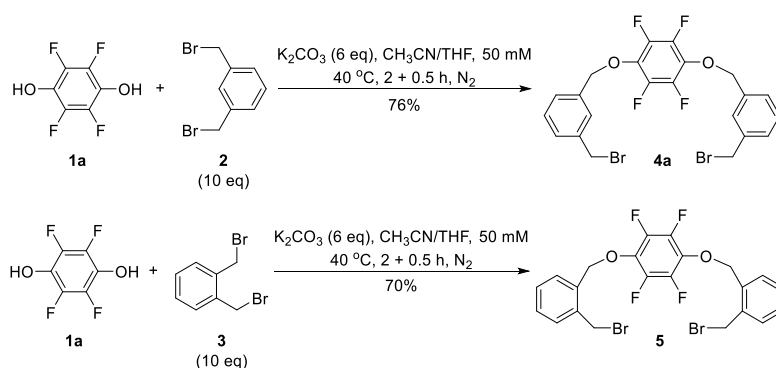

**2** or **3** (13.20 g, 50 mmol, 10 equiv.),  $\text{K}_2\text{CO}_3$  (4.15 g, 30 mmol, 6 equiv.), and anhydrous acetonitrile (75 mL) were put into a 250 mL dry two-necked round bottom flask under  $\text{N}_2$  atmosphere. To this mixture at  $40^\circ\text{C}$  was added dropwise a solution of **1a** (0.91 mg, 5 mmol, 1 equiv.) in anhydrous acetonitrile (25 mL) and tetrahydrofuran (25 mL) over 2 hours. The resulting mixture was stirred vigorously for 30 minutes and then cooled to room temperature. Brine (100 mL) and 2N HCl (30 mL) were added to quench the reaction, and the mixture was extracted with ethyl acetate ( $200 \text{ mL} \times 1$ ,  $50 \text{ mL} \times 3$ ). The organic phases were then combined and dried over anhydrous  $\text{Na}_2\text{SO}_4$ . After filtration and removal of solvent, the residue was chromatographed on a silica gel column with a mixture of petroleum ether and dichloromethane ( $v : v = 9 : 1 - 7 : 3$ ) as the mobile phase to give first the recovered bis(bromomethyl)benzene **2** or **3** and then target product **4a** or **5**. (**Caution!** **2** and **3** cause serious eye irritation. Reactions and columns must be performed in a well ventilated fume hood.)

**4a** (2.08 g, 76%; 10.01 g, 7.6 equiv. of **2** was recovered): white solid, m.p. 143 °C. <sup>1</sup>H NMR (400 MHz, CDCl<sub>3</sub>, TMS): δ 7.44 (s, 2H), 7.40 - 7.32 (m, 6H), 5.14 (s, 4H), 4.49 (s, 4H); <sup>13</sup>C NMR (101 MHz, CDCl<sub>3</sub>, TMS): δ 142.0 (dddd, *J* = 250, 16, 7, 3 Hz), 138.4, 136.5, 132.5 (tt, *J* = 11, 4 Hz), 129.6, 129.3, 129.0, 128.5, 76.4, 33.2; <sup>19</sup>F NMR (367 MHz, CDCl<sub>3</sub>): δ -156.8. IR (KBr): ν 2962, 2920, 2846, 1500, 1382 cm<sup>-1</sup>. HRMS (ESI) Calculated for [M+Na]<sup>+</sup>: 568.9345, Found: 568.9346.

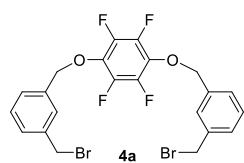

**5** (1.91 g, 70%; 10.50 g, 8.0 equiv. of **3** was recovered): white solid, m.p. 150-151 °C. <sup>1</sup>H NMR (400 MHz, CDCl<sub>3</sub>, TMS): δ 7.44 - 7.28 (m, 8H), 5.31 (s, 4H), 4.72 (s, 4H); <sup>13</sup>C NMR (101 MHz, CDCl<sub>3</sub>, TMS): δ 142.2 (dddd, *J* = 230, 19, 4, 3 Hz), 137.1, 134.2, 132.4 (tt, *J* = 9, 6 Hz), 131.0, 130.8, 129.9, 129.2, 74.1, 30.5; <sup>19</sup>F NMR (367 MHz, CDCl<sub>3</sub>): δ -156.6. IR (KBr): ν 2920, 2893, 2850, 1504, 1377 cm<sup>-1</sup>. HRMS (ESI) Calculated for [M+Na]<sup>+</sup>: 568.9345, Found: 568.9350.

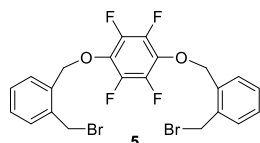

**Table S1.** Optimization of the synthesis of **4a** and **5**

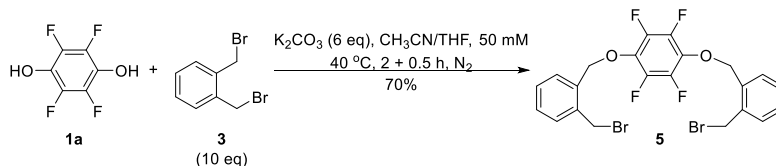

| Entry           | <b>3</b> (eq)          | Temp.        | PTC (eq)    | Base (eq)                                | Time                   | Yield [%] |
|-----------------|------------------------|--------------|-------------|------------------------------------------|------------------------|-----------|
| 1               | 3.0                    | rt           | --          | K <sub>2</sub> CO <sub>3</sub> (6.0)     | 12 + 12 h <sup>a</sup> | 29        |
| 2               | 3.0                    | 40 °C        | --          | K <sub>2</sub> CO <sub>3</sub> (6.0)     | 2 + 0.5 h              | 33        |
| 3               | 3.0                    | 60 °C        | --          | K <sub>2</sub> CO <sub>3</sub> (6.0)     | 2 + 0.5 h              | 30        |
| 4               | 3.0                    | reflux       | --          | K <sub>2</sub> CO <sub>3</sub> (6.0)     | 2 + 0.5 h              | 30        |
| 5               | 3.0                    | 40 °C        | TEABr (1.0) | K <sub>2</sub> CO <sub>3</sub> (6.0)     | 2 + 0.5 h              | 29        |
| 6               | 3.0                    | rt           | --          | K <sub>2</sub> CO <sub>3</sub> (4.0)     | 12 + 12 h              | 23        |
| 7               | 3.0                    | 40 °C        | --          | K <sub>2</sub> CO <sub>3</sub> (8.0)     | 2 + 0.5 h              | 32        |
| 8               | 3.0                    | 40 °C        | --          | K <sub>2</sub> CO <sub>3</sub> (6.0)     | 2 + 2 h                | 31        |
| 9               | 5.0 (3.1) <sup>a</sup> | 40 °C        | --          | K <sub>2</sub> CO <sub>3</sub> (6.0)     | 2 + 0.5 h              | 51        |
| <b>10</b>       | <b>10.0 (8.0)</b>      | <b>40 °C</b> | --          | <b>K<sub>2</sub>CO<sub>3</sub> (6.0)</b> | <b>2 + 0.5 h</b>       | <b>70</b> |
| 11 <sup>b</sup> | 10.0 (8.1)             | 40 °C        | --          | K <sub>2</sub> CO <sub>3</sub> (6.0)     | 2 + 0.5 h              | 67        |

<sup>a</sup> 5.0 equiv. of **3** were used and 3.1 equiv. were recovered. <sup>b</sup> Bubble nitrogen through the solvent for 30 minutes.

**Table S2.** Optimization of the synthesis of **1a** and **2**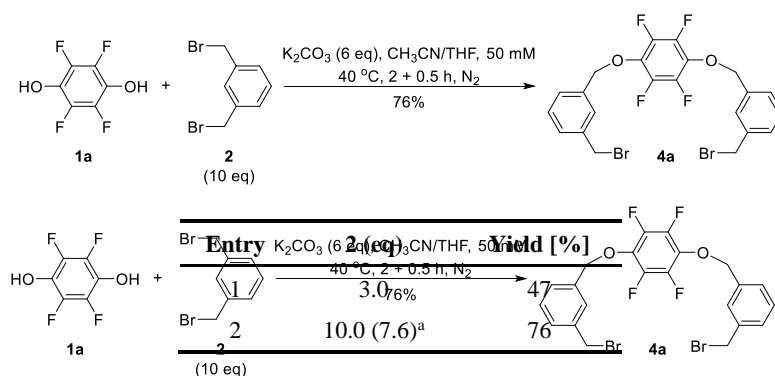

<sup>a</sup> 10.0 equiv. of **2** were used and 7.6 equiv. were recovered.

**Procedure B: Synthesis of 4b**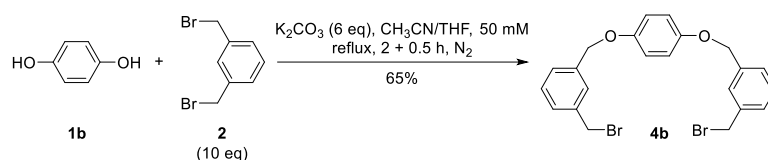

**2** (26.40 g, 100 mmol, 10 equiv.),  $K_2CO_3$  (8.30 g, 60 mmol, 6 equiv.), and anhydrous acetonitrile (150 mL) were put into a 500 mL dry two-necked round bottom flask under  $N_2$  atmosphere. To this mixture under reflux was added dropwise a solution of **1b** (1.10 g, 10 mmol, 1 equiv.) in anhydrous acetonitrile (50 mL) and tetrahydrofuran (50 mL) over 2 hours. The resulting mixture was stirred vigorously for 30 minutes and then cooled to room temperature. Brine (200 mL) and 2N HCl (60 mL) were added to quench the reaction, and the mixture was extracted with ethyl acetate (400 mL  $\times$  1, 50 mL  $\times$  3). The organic phases were then combined and dried over anhydrous  $Na_2SO_4$ . After filtration and removal of solvent, the residue was chromatographed on a silica gel column with a mixture of petroleum ether and dichloromethane ( $v : v = 9 : 1 - 1 : 1$ ) as the mobile phase to give first the recovered **2** (20.32 g, 7.7 equiv.) and then **4b** (3.11 g, 65%). (**Caution!** **2** causes serious eye irritation. Reactions and columns must be performed in a well ventilated fume hood.)

**4b**: white solid, m.p. 137-138 °C.  $^1H$  NMR (400 MHz,  $CDCl_3$ , TMS):  $\delta$  7.46 (s, 2H), 7.36 (s, 6H), 6.91 (s, 4H), 5.01 (s, 4H), 4.51 (s, 4H);  $^{13}C$  NMR (101 MHz,  $CDCl_3$ , TMS):  $\delta$  153.2, 138.2, 138.1, 129.2, 128.7, 128.1, 127.6, 115.9, 70.4, 33.5. IR (KBr):  $\nu$  2920, 2869, 1507, 1471, 1384, 1232, 1208  $cm^{-1}$ . HRMS (ESI) Calculated for  $[M+Na]^+$ : 496.9722, Found:

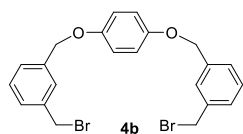

**Table S3.** Optimization of the condensation reaction between **1b** and **2**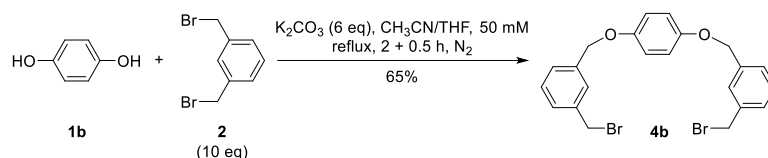

| Entry | 3 (eq)                  | Temp.  | Yield [%] |
|-------|-------------------------|--------|-----------|
| 1     | 10.0 (8.5) <sup>a</sup> | 40 °C  | 39        |
| 2     | 10.0 (7.7)              | reflux | 65        |

<sup>a</sup> 10.0 equiv. of **3** were used and 8.5 equiv. were recovered.

## 2.2 Synthesis of homo *i*-corona[4]arenes **7a-f** and **8**

### Procedure A: Synthesis of **7a**, **7b**, and **8**

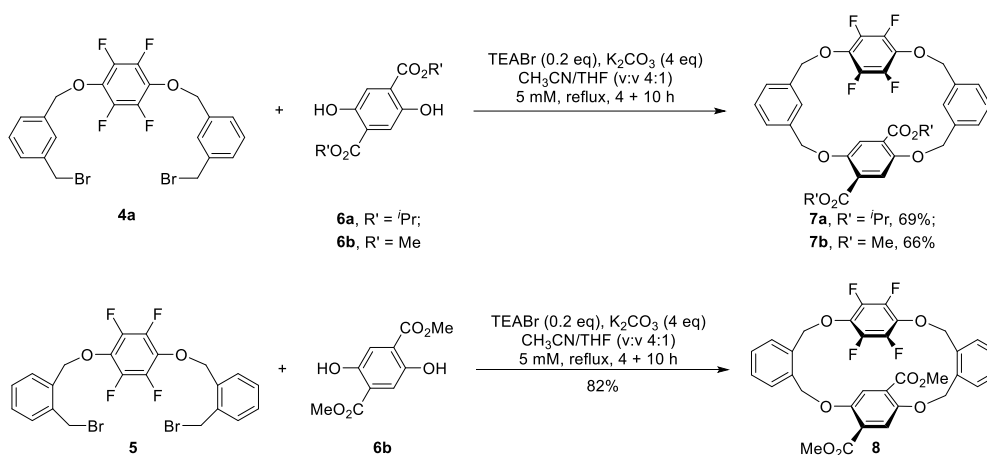

Synthesis of **7a**. TEABr (10.5 mg, 0.05 mmol, 0.2 equiv.),  $K_2CO_3$  (138.2 mg, 1.0 mmol, 4 eq), and anhydrous acetonitrile (25 mL) were put into a 100 mL dry two-necked round bottom flask under ambient atmosphere. To this mixture under reflux was added dropwise a solution of **4a** (137.0 mg, 0.25 mmol, 1 equiv.) and **6a** (70.6 mg, 0.25 mmol, 1 equiv.) in anhydrous acetonitrile (15 mL) and tetrahydrofuran (10 mL) over 4 hours. The resulting mixture was stirred vigorously for 10 hours and then cooled to room temperature. Brine (50 mL) and 2N HCl (1 mL) were added to quench the reaction, and the mixture was extracted with ethyl acetate (100 mL  $\times$  1, 20 mL  $\times$  3). The organic phases were then combined and dried over anhydrous  $Na_2SO_4$ . After filtration and removal of solvent, the residue was chromatographed on a silica gel column with a mixture of petroleum ether and ethyl acetate (v : v = 17 : 3) as the mobile phase to give

pure product **7a** (109.5mg, 66%).

**7a**: white solid, m.p. 164-166 °C. <sup>1</sup>H NMR (400 MHz, CDCl<sub>3</sub>, TMS): δ 7.36-7.27 (m, 8H), 7.19 (s, 2H), 5.34 (d, *J* = 14.2 Hz, 2H), 5.20 (d, *J* = 12.8 Hz, 2H), 5.17 (hept, *J* = 6.0 Hz, 2H), 5.16 (d, *J* = 14.2 Hz, 2H), 5.06 (d, *J* = 12.8 Hz, 2H), 1.33 (d, *J* = 6.0 Hz, 6H), 1.31 (d, *J* = 6.0 Hz, 6H); <sup>13</sup>C NMR (101 MHz, CDCl<sub>3</sub>, TMS): δ 164.5, 150.6, 141.4 (dddd, *J* = 240, 15, 9, 3 Hz), 137.3, 136.9, 131.6 (tt, *J* = 9, 4 Hz), 128.8, 127.6, 127.6, 126.6, 124.9, 118.1, 75.8, 70.5, 68.7, 22.0, 21.9; <sup>19</sup>F NMR (367 MHz, CDCl<sub>3</sub>): δ -156.7. IR (KBr): ν 2922, 2966, 2854, 1723, 1501, 1232 cm<sup>-1</sup>. HRMS (ESI) Calculated for [M]<sup>-</sup>: 668.2039, Found: 668.2039. HPLC: IA column, 25 °C, 0.5 mL/min flow rate, CHCl<sub>3</sub> : <sup>i</sup>PrOH : Hexane = 3 : 1 : 21, *t*<sub>1</sub> = 16.9 min, [α]<sub>D</sub><sup>25</sup> = -26.9 (*c* 0.6, DCM), *t*<sub>2</sub> = 20.0 min, [α]<sub>D</sub><sup>25</sup> = +26.9 (*c* 0.6, DCM).

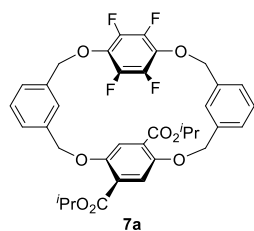

Synthesis of **7b**. Follow the general procedure. **4a** (274.1 mg, 0.5 mmol) and **6b** (113.1 mg, 0.5 mmol) were used. The resulting residue was chromatographed on a silica gel column with a mixture of petroleum ether and ethyl acetate (*v* : *v* = 4 : 1) as the mobile phase to give pure product **7b** (211.0 mg, 69%).

**7b**: white solid, m.p. 164-166 °C. <sup>1</sup>H NMR (400 MHz, CDCl<sub>3</sub>, TMS): δ 7.36-7.27 (m, 8H), 7.19 (s, 2H), 5.34 (d, *J* = 14.2 Hz, 2H), 5.20 (d, *J* = 12.8 Hz, 2H), 5.17 (hept, *J* = 6.0 Hz, 2H), 5.16 (d, *J* = 14.2 Hz, 2H), 5.06 (d, *J* = 12.8 Hz, 2H), 1.33 (d, *J* = 6.0 Hz, 6H), 1.31 (d, *J* = 6.0 Hz, 6H); <sup>13</sup>C NMR (101 MHz, CDCl<sub>3</sub>, TMS): δ 164.5, 150.6, 141.4 (dddd, *J* = 240, 15, 9, 3 Hz), 137.3, 136.9, 131.6 (tt, *J* = 9, 4 Hz), 128.8, 127.6, 127.6, 126.6, 124.9, 118.1, 75.8, 70.5, 68.7, 22.0, 21.9; <sup>19</sup>F NMR (367 MHz, CDCl<sub>3</sub>): δ -156.7. IR (KBr): ν 2953, 2921, 2850, 1730, 1500 cm<sup>-1</sup>. HRMS (ESI) Calculated for [M]<sup>-</sup>: 668.2039, Found: 668.2039.

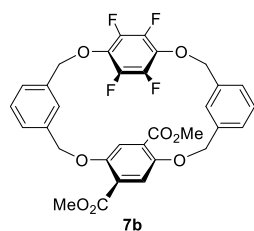

Synthesis of **8**. Follow the general procedure. The resulting residue was chromatographed on a silica gel column with a mixture of petroleum ether, dichloromethane, and ethyl acetate (*v* : *v* : *v* = 3 : 3 : 14) as the mobile phase to give pure product **8**. **5** (1.0964 g, 2 mmol) and **6b** (452.4 g, 2 mmol) were used to give **8** (901.2 g, 74%) while a gram-scale synthesis using **5** (2.7408 g, 5 mmol) and **6b** (1.1305

g, 5 mmol) gave **8** (2.5008 g ,82%).

**Table S4.** Optimization of the macrocyclization reaction between **4a** and **6a**

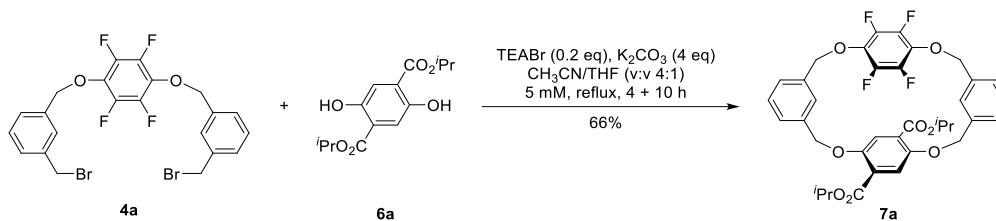

| Entry     | Temp.         | PTC (eq)                 | Solv.                             | Base (eq)                                | Time            | Conc.       | Yield [%] |
|-----------|---------------|--------------------------|-----------------------------------|------------------------------------------|-----------------|-------------|-----------|
| 1         | reflux        | --                       | CH <sub>3</sub> CN/THF (1:1)      | K <sub>2</sub> CO <sub>3</sub> (6.0)     | 4 + 10 h        | 5 mM        | 39        |
| 2         | reflux        | CTAB (1.0)               | CH <sub>3</sub> CN/THF (1:1)      | K <sub>2</sub> CO <sub>3</sub> (6.0)     | 4 + 10 h        | 5 mM        | 55        |
| 3         | 60 °C         | CTAB (1.0)               | CH <sub>3</sub> CN/THF (1:1)      | K <sub>2</sub> CO <sub>3</sub> (6.0)     | 8 + 16 h        | 5 mM        | 57        |
| 4         | 40 °C         | CTAB (1.0)               | CH <sub>3</sub> CN/THF (1:1)      | K <sub>2</sub> CO <sub>3</sub> (6.0)     | 8 + 40 h        | 5 mM        | 50        |
| 5         | rt            | CTAB (1.0)               | CH <sub>3</sub> CN/THF (1:1)      | K <sub>2</sub> CO <sub>3</sub> (6.0)     | 8 + 16 h        | 5 mM        | NR        |
| 6         | reflux        | TBABr (1.0)              | CH <sub>3</sub> CN/THF (1:1)      | K <sub>2</sub> CO <sub>3</sub> (6.0)     | 4 + 10 h        | 5 mM        | 54        |
| <b>7</b>  | reflux        | TEABr (1.0)              | CH <sub>3</sub> CN/THF (1:1)      | K <sub>2</sub> CO <sub>3</sub> (6.0)     | 4 + 10 h        | 5 mM        | 57        |
| 8         | reflux        | TMABr (1.0)              | CH <sub>3</sub> CN/THF (1:1)      | K <sub>2</sub> CO <sub>3</sub> (6.0)     | 4 + 10 h        | 5 mM        | 56        |
| 9         | reflux        | TEACl (1.0)              | CH <sub>3</sub> CN/THF (1:1)      | K <sub>2</sub> CO <sub>3</sub> (6.0)     | 4 + 10 h        | 5 mM        | 42        |
| 10        | reflux        | TEAI (1.0)               | CH <sub>3</sub> CN/THF (1:1)      | K <sub>2</sub> CO <sub>3</sub> (6.0)     | 4 + 10 h        | 5 mM        | 51        |
| 11        | reflux        | TEANO <sub>3</sub> (1.0) | CH <sub>3</sub> CN/THF (1:1)      | K <sub>2</sub> CO <sub>3</sub> (6.0)     | 4 + 10 h        | 5 mM        | 42        |
| 12        | reflux        | TEABF <sub>4</sub> (1.0) | CH <sub>3</sub> CN/THF (1:1)      | K <sub>2</sub> CO <sub>3</sub> (6.0)     | 4 + 10 h        | 5 mM        | 27        |
| 13        | reflux        | TEAPF <sub>6</sub> (1.0) | CH <sub>3</sub> CN/THF (1:1)      | K <sub>2</sub> CO <sub>3</sub> (6.0)     | 4 + 10 h        | 5 mM        | 23        |
| 14        | reflux        | AOT (1.0)                | CH <sub>3</sub> CN/THF (1:1)      | K <sub>2</sub> CO <sub>3</sub> (6.0)     | 4 + 10 h        | 5 mM        | NR        |
| 15        | reflux        | TEABr (1.0)              | THF                               | K <sub>2</sub> CO <sub>3</sub> (6.0)     | 4 + 10 h        | 5 mM        | NR        |
| 16        | reflux        | TEABr (1.0)              | CHCl <sub>3</sub>                 | K <sub>2</sub> CO <sub>3</sub> (6.0)     | 4 + 10 h        | 5 mM        | NR        |
| 17        | reflux        | TEABr (1.0)              | CH <sub>3</sub> CN/THF (4:1)      | K <sub>2</sub> CO <sub>3</sub> (6.0)     | 4 + 10 h        | 5 mM        | 66        |
| 18        | reflux        | TEABr (1.0)              | CH <sub>3</sub> CN/THF (4:1)      | Na <sub>2</sub> CO <sub>3</sub> (6.0)    | 4 + 10 h        | 5 mM        | NR        |
| 19        | reflux        | TEABr (1.0)              | CH <sub>3</sub> CN/THF (4:1)      | Cs <sub>2</sub> CO <sub>3</sub> (6.0)    | 4 + 1 h         | 5 mM        | 52        |
| 20        | reflux        | TEABr (1.0)              | CH <sub>3</sub> CN/THF (4:1)      | K <sub>3</sub> PO <sub>4</sub> (6.0)     | 4 + 1 h         | 5 mM        | 53        |
| 21        | reflux        | TEABr (0.2)              | CH <sub>3</sub> CN/THF (4:1)      | K <sub>2</sub> CO <sub>3</sub> (6.0)     | 4 + 10 h        | 5 mM        | 63        |
| 22        | reflux        | TEABr (0.1)              | CH <sub>3</sub> CN/THF (4:1)      | K <sub>2</sub> CO <sub>3</sub> (6.0)     | 4 + 10 h        | 5 mM        | 52        |
| <b>23</b> | <b>reflux</b> | <b>TEABr (0.2)</b>       | <b>CH<sub>3</sub>CN/THF (4:1)</b> | <b>K<sub>2</sub>CO<sub>3</sub> (4.0)</b> | <b>4 + 10 h</b> | <b>5 mM</b> | <b>66</b> |
| 24        | reflux        | TEABr (0.2)              | CH <sub>3</sub> CN/THF (4:1)      | K <sub>2</sub> CO <sub>3</sub> (2.5)     | 4 + 10 h        | 5 mM        | 40        |
| 25        | reflux        | TEABr (0.2)              | CH <sub>3</sub> CN/THF (4:1)      | K <sub>2</sub> CO <sub>3</sub> (4.0)     | 4 + 10 h        | 2.5 mM      | 55        |
| 26        | reflux        | TEABr (0.2)              | CH <sub>3</sub> CN/THF (4:1)      | K <sub>2</sub> CO <sub>3</sub> (4.0)     | 4 + 10 h        | 10 mM       | 57        |
| 27        | reflux        | TEABr (0.2)              | CH <sub>3</sub> CN/THF (4:1)      | K <sub>2</sub> CO <sub>3</sub> (4.0)     | 8 + 10 h        | 5 mM        | 63        |



**8**: white solid, m.p. 164-166 °C.  $^1\text{H NMR}$  (400 MHz,  $\text{CDCl}_3$ , TMS):  $\delta$  7.36-7.27 (m,

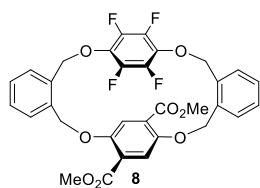

8H), 7.19 (s, 2H), 5.34 (d,  $J = 14.2$  Hz, 2H), 5.20 (d,  $J = 12.8$  Hz, 2H), 5.17 (hept,  $J = 6.0$  Hz, 2H), 5.16 (d,  $J = 14.2$  Hz, 2H), 5.06 (d,  $J = 12.8$  Hz, 2H), 1.33 (d,  $J = 6.0$  Hz, 6H), 1.31 (d,  $J = 6.0$  Hz, 6H);  $^{13}\text{C NMR}$  (101 MHz,  $\text{CDCl}_3$ , TMS):  $\delta$  164.5, 150.6, 141.4

(dddd,  $J = 240, 15, 9, 3$  Hz), 137.3, 136.9, 131.6 (tt,  $J = 9, 4$  Hz), 128.8, 127.6, 127.6, 126.6, 124.9, 118.1, 75.8, 70.5, 68.7, 22.0, 21.9;  $^{19}\text{F NMR}$  (367 MHz,  $\text{CDCl}_3$ ):  $\delta$  -156.7.

**IR** (KBr):  $\nu$  2957, 2919, 2849, 1740, 1506, 1200  $\text{cm}^{-1}$ . **HRMS** (ESI) Calculated for  $[\text{M}]^-$ : 668.2039, Found: 668.2039. **HPLC**: IA column, 25 °C, 0.5 mL/min flow rate,  $\text{CHCl}_3$  :  $i\text{PrOH}$  : Hexane = 3 : 1 : 21,  $t_1 = 16.5$  min,  $[\alpha]_{\text{D}}^{25} = +32.4$  ( $c$  0.6, DCM),  $t_2 = 40.0$  min,  $[\alpha]_{\text{D}}^{25} = -32.4$  ( $c$  0.6, DCM).

### Procedure B: Synthesis of **7c** and **7f**

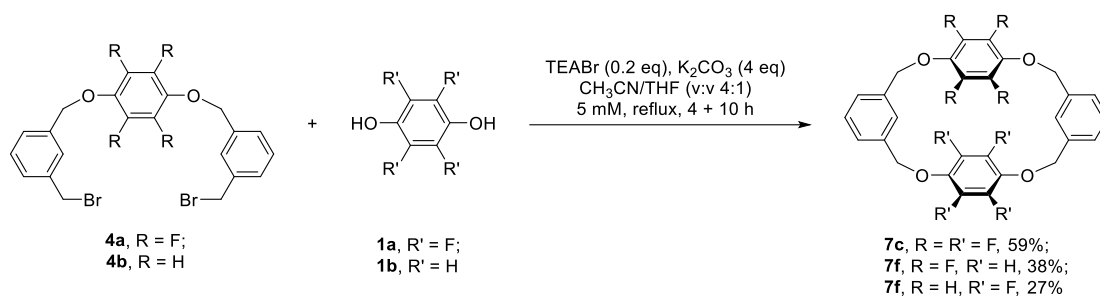

Synthesis of **7c**. Acetonitrile and tetrahydrofuran were bubbled with nitrogen for 30 minutes. TEABr (10.5 mg, 0.05 mmol, 0.2 equiv.),  $\text{K}_2\text{CO}_3$  (138.2 mg, 1.0 mmol, 4 eq), and anhydrous acetonitrile (25 mL) were put into a 100 mL dry two-necked round bottom flask under  $\text{N}_2$  atmosphere. To this mixture under reflux was added dropwise a solution of **4a** (137.0 mg, 0.25 mmol, 1 equiv.) and **1a** (45.5 mg, 0.25 mmol, 1 equiv.) in anhydrous acetonitrile (15 mL) and tetrahydrofuran (10 mL) over 4 hours. The resulting mixture was stirred vigorously for 10 hours and then cooled to room temperature. Brine (50 mL) and 2N HCl (1 mL) were added to quench the reaction, and the mixture was extracted with ethyl acetate (100 mL  $\times$  1, 20 mL  $\times$  3). The organic phases were then combined and dried over anhydrous  $\text{Na}_2\text{SO}_4$ . After filtration and removal of solvent, the residue was chromatographed on a silica gel column with a mixture of petroleum ether and dichloromethane ( $v : v = 3 : 2$ ) as the mobile phase to give pure product **7c** (84.0 mg, 59%).

**7c**: white solid, m.p. 169-170 °C.  $^1\text{H NMR}$  (400 MHz,  $\text{CDCl}_3$ , TMS):  $\delta$  7.35 (s, 2H), 7.18 (m, 6H), 5.20 (s, 8H);  $^{13}\text{C NMR}$  (101 MHz,  $\text{CDCl}_3$ , TMS):  $\delta$  141.5 (m), 135.8, 130.6 (m), 128.9, 128.8, 128.4, 74.7;  $^{19}\text{F NMR}$  (367 MHz,  $\text{CDCl}_3$ ):  $\delta$  -156.9. **IR** (KBr):  $\nu$  2958, 2920, 2846, 1500, 1465  $\text{cm}^{-1}$ . **HRMS** (APCI) Calculated for  $[\text{M}]^-$ : 568.0915, Found: 568.0903.

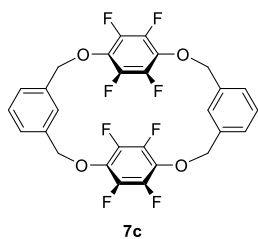

Synthesis of **7f**. Follow the general procedure. **I. 4a** (137.0 mg, 0.25 mmol) and **1b** (27.5 mg, 0.25 mmol) were used to produce **7f** (47.7 mg, 38%). **II. 4b** (119.1 mg, 0.25 mmol) and **1a** (45.5 mg, 0.25 mmol) were used to produce **7f** (33.0 mg, 27%). The resulting residue was chromatographed on a silica gel column with a mixture of petroleum ether and dichloromethane ( $\nu : \nu = 3 : 2 - 1 : 1$ ) as the mobile phase to give pure product **7f**.

**7f**: white solid, m.p. 198-200 °C.  $^1\text{H NMR}$  (400 MHz,  $\text{CDCl}_3$ , TMS):  $\delta$  7.48 (s, 2H), 7.20 – 7.14 (m, 4H), 7.10 – 7.06 (m, 2H), 6.58 (s, 4H), 5.24 (s, 4H), 5.12 (s, 4H);  $^{13}\text{C NMR}$  (101 MHz,  $\text{CDCl}_3$ , TMS):  $\delta$  151.6, 141.4 (dddd,  $J = 248, 16, 9, 4$  Hz), 138.5, 136.1, 130.9 (tt,  $J = 9, 6$  Hz), 128.5, 127.3, 127.0, 126.3, 116.2, 74.9, 69.7;  $^{19}\text{F NMR}$  (367 MHz,  $\text{CDCl}_3$ ):  $\delta$  -156.8. **IR** (KBr):  $\nu$  2958, 2921, 2896, 2851, 1499, 1470  $\text{cm}^{-1}$ . **HRMS** (APCI) Calculated for  $[\text{M}]^-$ : 497.1370, Found: 497.1365.

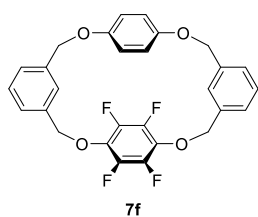

**Table S5.** Optimization of the macrocyclization reaction between **4a** and **1a**

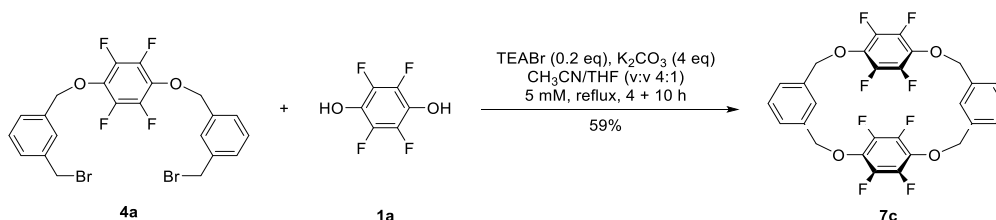

| Entry | Solv.                            | Treatment of Solvents | Yield [%] |
|-------|----------------------------------|-----------------------|-----------|
| 1     | $\text{CH}_3\text{CN/THF (4:1)}$ | -                     | 8         |
| 2     | $\text{CH}_3\text{CN/THF (4:1)}$ | Bubbled with nitrogen | 59        |

### Procedure C: Synthesis of **7d** and **7e**

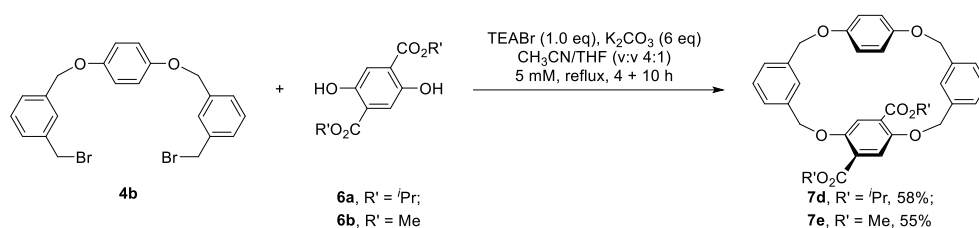

Synthesis of **7d**. TEABr (52.5 mg, 0.25 mmol, 1.0 equiv.),  $\text{K}_2\text{CO}_3$  (207.3 mg, 1.5 mmol, 6 eq), and anhydrous acetonitrile (25 mL) were put into a 100 mL dry two-necked round bottom flask under ambient atmosphere. To this mixture under reflux was added dropwise a solution of **4b** (119.1 mg, 0.25 mmol, 1 equiv.) and **6a** (70.6 mg, 0.25 mmol, 1 equiv.) in anhydrous acetonitrile (15 mL) and tetrahydrofuran (10 mL) over 4 hours. The resulting mixture was stirred vigorously for 10 hours and then cooled to room temperature. Brine (50 mL) and 2N HCl (1 mL) were added to quench the reaction, and the mixture was extracted with ethyl acetate (100 mL  $\times$  1, 20 mL  $\times$  3). The organic phases were then combined and dried over anhydrous  $\text{Na}_2\text{SO}_4$ . After filtration and removal of solvent, the residue was chromatographed on a silica gel column with a mixture of petroleum ether, dichloromethane, and ethyl acetate (v : v : v = 8 : 1 : 1) as the mobile phase to give pure product **7d** (86.4 mg, 58%).

**7d**: white solid, m.p. 160-162 °C.  $^1\text{H NMR}$  (400 MHz,  $\text{DMSO}-d_6$ , TMS):  $\delta$  7.47 (s,

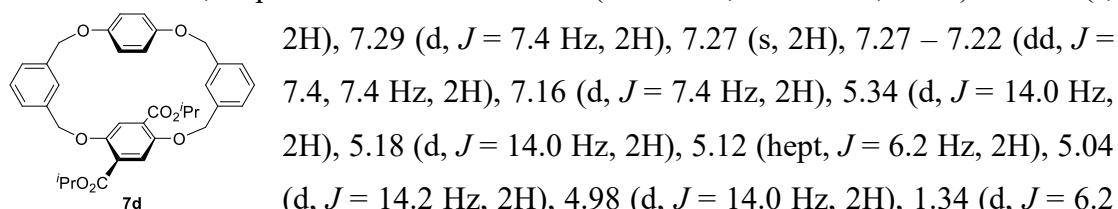

2H), 7.29 (d,  $J = 7.4$  Hz, 2H), 7.27 (s, 2H), 7.27 – 7.22 (dd,  $J = 7.4, 7.4$  Hz, 2H), 7.16 (d,  $J = 7.4$  Hz, 2H), 5.34 (d,  $J = 14.0$  Hz, 2H), 5.18 (d,  $J = 14.0$  Hz, 2H), 5.12 (hept,  $J = 6.2$  Hz, 2H), 5.04 (d,  $J = 14.2$  Hz, 2H), 4.98 (d,  $J = 14.0$  Hz, 2H), 1.34 (d,  $J = 6.2$

Hz, 6H), 1.33 (d,  $J = 6.2$  Hz, 6H);  $^{13}\text{C NMR}$  (101 MHz,  $\text{CDCl}_3$ , TMS):  $\delta$  164.9, 152.6, 150.1, 139.1, 137.2, 129.1, 126.9, 126.5, 126.1, 125.0, 117.4, 116.4, 70.9, 70.0, 68.9, 22.1. **IR** (KBr):  $\nu$  2958, 2921, 2850, 1721, 1500, 1468  $\text{cm}^{-1}$ . **HRMS** (APCI) Calculated for  $[\text{M}]^-$ : 596.2416, Found: 596.2418. **HPLC**: IA column, 25 °C, 0.5 mL/ flow rate,  $\text{CHCl}_3$  :  $i\text{PrOH}$  : Hexane = 3 : 1 : 21,  $t_1 = 21.3$  min,  $[\alpha]_{\text{D}}^{25} = -17.2$  (c 0.6, DCM),  $t_2 = 24.2$  min,  $[\alpha]_{\text{D}}^{25} = +17.2$  (c 0.6, DCM).

Synthesis of **7e**. Follow the general procedure. **4b** (1.0953 g, 2.30 mmol) and **6b** (520.2 mg, 2.30 mmol) were used. The resulting residue was chromatographed on a silica gel

column with a mixture of dichloromethane and ethyl acetate (v : v = 25 : 1) as the mobile phase to give pure product **7e** (678.7 mg, 55%).

**7e**: white solid, m.p. 169-170 °C. <sup>1</sup>H NMR (400 MHz, CDCl<sub>3</sub>, TMS): δ 7.46 (s, 2H), 7.28 (d, *J* = 7.2 Hz, 2H), 7.25 – 7.19 (m, 6H), 6.40 (s, 4H), 5.34 (d, *J* = 13.8 Hz, 2H), 5.18 (d, *J* = 13.8 Hz, 2H), 5.06 (d, *J* = 14.6 Hz, 2H), 4.99 (d, *J* = 14.6 Hz, 2H), 3.90 (s, 6H); <sup>13</sup>C NMR (101 MHz, CDCl<sub>3</sub>, TMS): δ 165.8, 152.3, 150.0, 138.9, 136.8, 129.0, 126.8, 126.3, 125.9, 124.4, 117.3, 116.0, 70.4, 69.8, 52.4. IR (KBr): ν 2950, 2921, 2850, 1733, 1504, 1376 cm<sup>-1</sup>. HRMS (APCI) Calculated for [M]<sup>-</sup>: 540.1779, Found: 540.1776.

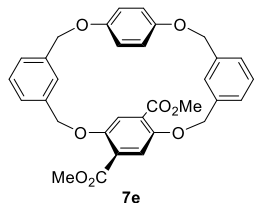

**Table S6.** Optimization of the macrocyclization reaction between **4b** and **6a, b**

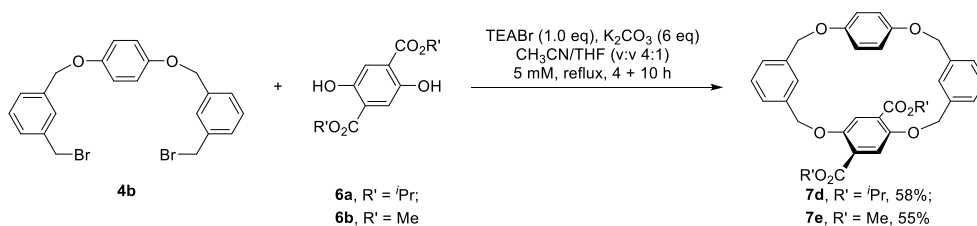

| Entry | R'          | PTC (eq)    | Base (eq)                            | Yield [%] |
|-------|-------------|-------------|--------------------------------------|-----------|
| 1     | <i>i</i> Pr | TEABr (0.2) | K <sub>2</sub> CO <sub>3</sub> (4.0) | 40        |
| 2     | <i>i</i> Pr | TEABr (1.0) | K <sub>2</sub> CO <sub>3</sub> (6.0) | 58        |
| 3     | Me          | TEABr (0.2) | K <sub>2</sub> CO <sub>3</sub> (4.0) | 37        |
| 4     | Me          | TEABr (1.0) | K <sub>2</sub> CO <sub>3</sub> (6.0) | 55        |

### 2.3 Synthesis of ditopic spirophanes **15** and **16**

#### Procedure A: Synthesis of diols **9** and **10**

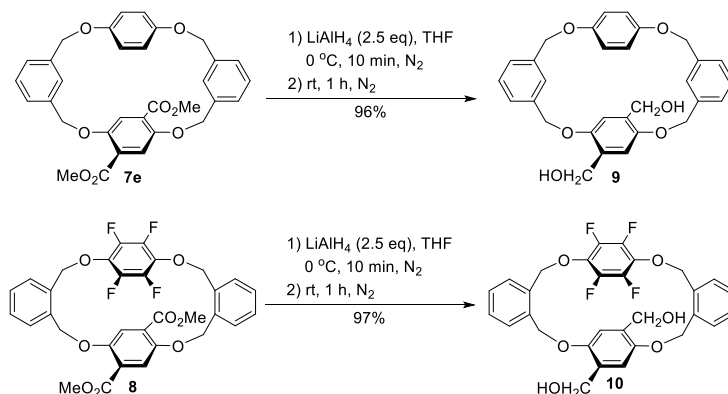

Synthesis of **9**. **7e** (359.0 mg, 0.66 mmol) and anhydrous tetrahydrofuran (33 mL) were put into a 100 mL dry two-necked round bottom flask under nitrogen atmosphere. To this solution under ice bath was added LiAlH<sub>4</sub> (63.0 mg, 1.66 mmol, 2.5 equiv.) in portions over 10 minutes. The resulting mixture was warmed to room temperature and stirred for 1 hour. The mixture was again cooled in an ice bath and ammonia (1 mL) was added dropwise to quench the reaction. 2N HCl (20 mL) and brine (50 mL) was added and the mixture was extracted with ethyl acetate (150 mL × 1, 20 mL × 3). The organic phases were then combined and dried over anhydrous Na<sub>2</sub>SO<sub>4</sub>. After filtration and removal of solvent, the residue was recrystallized with dichloromethane and petroleum ether to give pure product **9** (307.1 mg, 96%). (The residue should be cooled to room temperature because **9** does not precipitate in hot solvents.)

**9**: white solid, m.p. 161-164 °C. <sup>1</sup>H NMR (400 MHz, CDCl<sub>3</sub>, TMS): 7.37 (s, 2H), 7.31 (t, *J* = 7.6 Hz, 2H), 7.23 (d, *J* = 7.6 Hz, 2H), 7.17 (d, *J* = 7.6 Hz, 2H), 6.66 (s, 2H), 6.44 (s, 4H), 5.16 (s, 4H), 5.05 (s, 4H), 4.43 (s, 4H); <sup>13</sup>C NMR (101 MHz, CDCl<sub>3</sub>, TMS): δ 152.5, 148.7, 138.9, 137.9, 129.4, 129.1, 126.9, 125.9, 125.4, 116.1, 112.9, 70.4, 69.2, 61.8. IR (KBr): ν 3362, 2920, 2850, 1504, 1023 cm<sup>-1</sup>. HRMS (APCI) Calculated for [M]<sup>-</sup>: 484.1891, Found: 484.1884.

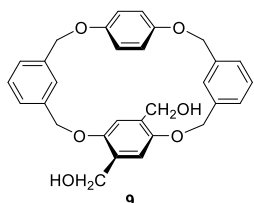

Synthesis of **10**. Follow the general procedure. **8** (813.0 mg, 1.33 mmol) was used to produce **10** (712.9 mg, 97%).

**10**: white solid, m.p. 238-240 °C. <sup>1</sup>H NMR (400 MHz, DMSO-*d*<sub>6</sub>, TMS): δ 7.59 - 7.43 (m, 8H), 6.95 (s, 2H), 5.44 (d, *J* = 11.0 Hz, 2H), 5.31 (d, *J* = 11.0 Hz, 2H), 5.12 (d, *J* = 11.0 Hz, 2H), 5.07 (d, *J* = 11.0 Hz, 2H), 5.01 (dd, *J* = 5.3, 4.7 Hz, 2H), 4.43 (dd, *J* = 13.5, 4.7 Hz, 2H), 4.26 (dd, *J* = 13.5, 5.3 Hz, 2H); <sup>13</sup>C NMR (101 MHz, acetone-*d*<sub>6</sub>, TMS): δ 151.8, 141.0 (m), 137.3, 136.6, 133.6 (tt, *J* = 9, 3 Hz), 131.8, 131.6, 130.8, 130.2, 129.7, 113.5, 76.5, 71.8, 59.2; <sup>19</sup>F NMR (367 MHz, DMSO-*d*<sub>6</sub>, 120 °C): δ -157.5. IR (KBr): ν 3423, 2955, 2920, 1636, 1500, 1039 cm<sup>-1</sup>. HRMS (APCI) Calculated for [M-H]<sup>-</sup>: 555.1436, Found: 555.1428. HPLC ID column, 25 °C, 0.5 mL/min flow rate, <sup>i</sup>PrOH : Hexane = 2 : 3, *t*<sub>1</sub> = 19.1 min, *t*<sub>2</sub> = 25.4 min.

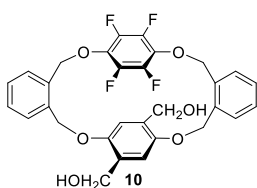

## Procedure B: Synthesis of 12

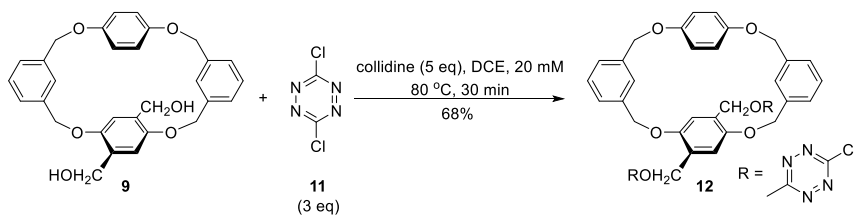

**11** (135.9 mg, 0.90 mmol, 3 equiv.) and anhydrous 1,2-dichloroethane (1 mL) were put into a 50 mL dry two-necked round bottom flask under ambient atmosphere. To this solution at 80 °C was added first collidine (198  $\mu$ L, 1.50 mmol, 5 equiv.) and subsequently dropwise a solution of **9** (145.4 mg, 0.30 mmol, 1 equiv.) in anhydrous 1,2-dichloroethane (14 mL) over 30 minutes. The resulting dark red mixture was cooled to room temperature. Brine (50 mL) and 2N HCl (0.75 mL) were added to quench the reaction, and the mixture was extracted with dichloromethane (50 mL  $\times$  3). The organic phases were then combined and dried over anhydrous Na<sub>2</sub>SO<sub>4</sub>. After filtration and removal of solvent, the residue was chromatographed on a silica gel column with a mixture of petroleum ether, dichloromethane, and ethyl acetate (v : v : v = 6 : 3 : 1) as the mobile phase to give the pure product **12** (144.8 mg, 68%).

**12**: red solid, m.p. 148-149 °C. <sup>1</sup>H NMR (400 MHz, CDCl<sub>3</sub>, TMS):  $\delta$  7.41 (s, 2H), 7.29

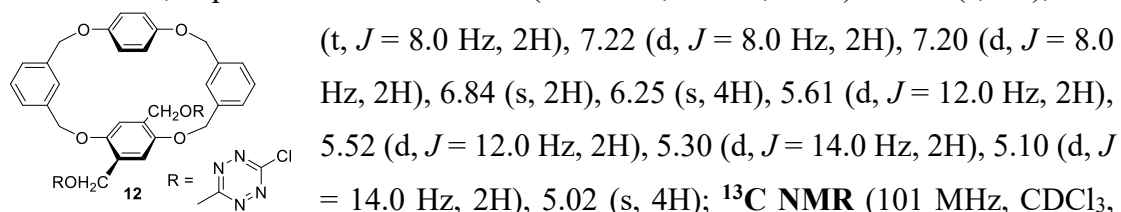

**12**: red solid, m.p. 148-149 °C. <sup>1</sup>H NMR (400 MHz, CDCl<sub>3</sub>, TMS):  $\delta$  7.41 (s, 2H), 7.29 (t,  $J = 8.0$  Hz, 2H), 7.22 (d,  $J = 8.0$  Hz, 2H), 7.20 (d,  $J = 8.0$  Hz, 2H), 6.84 (s, 2H), 6.25 (s, 4H), 5.61 (d,  $J = 12.0$  Hz, 2H), 5.52 (d,  $J = 12.0$  Hz, 2H), 5.30 (d,  $J = 14.0$  Hz, 2H), 5.10 (d,  $J = 14.0$  Hz, 2H), 5.02 (s, 4H); <sup>13</sup>C NMR (101 MHz, CDCl<sub>3</sub>, TMS):  $\delta$  166.4, 164.3, 152.5, 149.0, 139.3, 137.1, 129.2, 126.4, 126.1, 125.0, 123.9, 116.0, 114.2, 70.6, 69.2, 67.3. IR (KBr):  $\nu$  2921, 2850, 1504, 1477 cm<sup>-1</sup>. HRMS (ESI) Calculated for [M+Na]<sup>+</sup>: 735.1246, Found: 735.1245. HPLC IB column, 25 °C, 0.5 mL/min flow rate, DCM : Hexane = 2 : 3,  $t_1 = 17.0$  min,  $t_2 = 18.3$  min.

## Procedure C: Synthesis of 13

In this procedure, diol **10** was added in one portion instead of dropwise, because **10** has poor solubility in 1,2-dichloroethane and it dissolved along with the consumption in the reaction so that polymerization reactions were restrained.

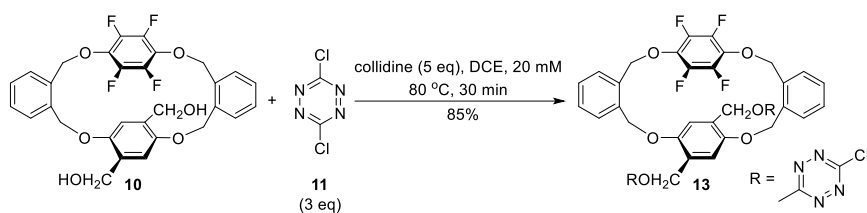

**11** (181.1 mg, 1.20 mmol, 3 equiv.), **10** (222.6 mg, 0.40 mmol, 1 equiv.), and anhydrous 1,2-dichloroethane (20 mL) were put into a 50 mL dry two-necked round bottom flask under ambient atmosphere. To this mixture at 80 °C was added collidine (264  $\mu$ L, 2.00 mmol, 5 equiv.). The resulting dark red mixture was stirred for 30 minutes and cooled to room temperature. Brine (50 mL) and 2N HCl (1 mL) were added to quench the reaction, and the mixture was extracted with dichloromethane (50 mL  $\times$  3). The organic phases were then combined and dried over anhydrous Na<sub>2</sub>SO<sub>4</sub>. After filtration and removal of solvent, the residue was chromatographed on a silica gel column with dichloromethane as the mobile phase to give the pure product **13** (267.8 mg, 85%).

**13**: red solid, m.p. 207-209 °C. <sup>1</sup>H NMR (400 MHz, CDCl<sub>3</sub>, TMS):  $\delta$  7.55-7.50 (m, 2H), 7.46-7.40 (m, 6H), 7.06 (s, 2H), 5.71 (d,  $J = 12.6$  Hz, 2H), 5.49 (d,  $J = 12.6$  Hz, 2H), 5.45 (d,  $J = 11.4$  Hz, 2H), 5.32 (d,  $J = 11.4$  Hz, 2H), 5.25 (d,  $J = 11.4$  Hz, 2H), 5.09 (d,  $J = 11.4$  Hz, 2H); <sup>13</sup>C NMR (101 MHz, CDCl<sub>3</sub>, TMS):  $\delta$  166.7, 164.6, 151.7, 140.4 (dddd,  $J = 245, 14, 5, 3$  Hz), 135.2, 134.9, 132.5 (tt,  $J = 9, 3$  Hz), 131.1, 130.7, 129.7, 129.4, 124.7, 115.3, 75.2, 71.7, 66.9; <sup>19</sup>F NMR (367 MHz, DMSO-*d*<sub>6</sub>, 120 °C):  $\delta$  -156.9. IR (KBr):  $\nu$  2854, 2921, 2850, 1501, 1475 cm<sup>-1</sup>. HRMS (MALDI) Calculated for [M+Na]<sup>+</sup>: 807.0868, Found: 807.0875. HPLC IB column, 25 °C, 0.5 mL/min flow rate, DCM : Hexane = 2 : 3,  $t_1 = 15.7$  min,  $t_2 = 22.5$  min.

**Table S7.** Optimization of the condensation reaction between **10** and **11**

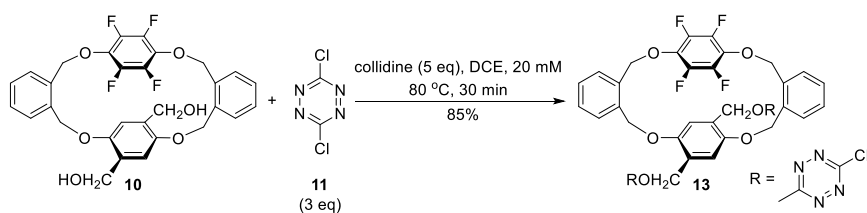

| Entry | 11 (eq)  | Temp.        | Solv.                                 | Base (eq)                             | Time         | Conc.        | Yields            |
|-------|----------|--------------|---------------------------------------|---------------------------------------|--------------|--------------|-------------------|
| 1     | 5        | 60 °C        | CHCl <sub>3</sub>                     | DIPEA (2.5)                           | 4 h          | 10 mM        | N.R. <sup>a</sup> |
| 2     | 5        | 60 °C        | CHCl <sub>3</sub>                     | DMAP (2.5)                            | 4 h          | 10 mM        | N.R.              |
| 3     | 5        | 60 °C        | CHCl <sub>3</sub>                     | DABCO (2.5)                           | 4 h          | 10 mM        | N.D. <sup>b</sup> |
| 4     | 5        | 60 °C        | CHCl <sub>3</sub>                     | collidine (2.5)                       | 4 h          | 10 mM        | <10%              |
| 5     | 5        | 60 °C        | CHCl <sub>3</sub>                     | Cs <sub>2</sub> CO <sub>3</sub> (2.5) | 4 h          | 10 mM        | N.R.              |
| 6     | 5        | 60 °C        | CHCl <sub>3</sub> /CH <sub>3</sub> CN | collidine (2.5)                       | 20 h         | 10 mM        | <10%              |
| 7     | 5        | 80 °C        | DCE                                   | collidine (5)                         | 1.5 h        | 10 mM        | 81%               |
| 8     | 3        | 80 °C        | DCE                                   | collidine (5)                         | 1.5 h        | 10 mM        | 37%               |
| 9     | 3        | 80 °C        | DCE                                   | collidine (5)                         | 1.5 h        | 20 mM        | 70%               |
| 10    | 3        | 80 °C        | DCE                                   | collidine (5)                         | 1.5 h        | 40 mM        | 63%               |
| 11    | <b>3</b> | <b>80 °C</b> | <b>DCE</b>                            | <b>collidine (5)</b>                  | <b>0.5 h</b> | <b>20 mM</b> | <b>85%</b>        |

<sup>a</sup> Diol **10** did not converse. <sup>b</sup> **13** was not detected.

### Procedure D: Synthesis of ditopic spirophanes **15** and **16**

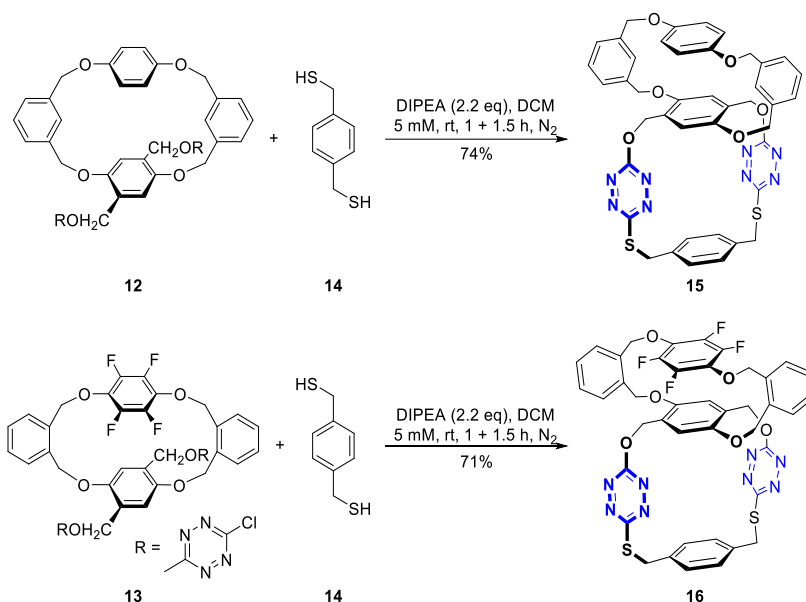

Synthesis of **15**. DIPEA (38  $\mu$ L, 0.22 mmol, 2.2 equiv.) and anhydrous dichloromethane (10 mL) were put into a 50 mL dry two-necked round bottom flask under nitrogen atmosphere. To this mixture was added a solution of **12** (71.4 mg, 0.10 mmol, 1 equiv.) and **14** (17.0 mg, 0.10 mmol, 1 equiv.) in anhydrous dichloromethane (10 mL) over 1 hour. The resulting red mixture was stirred at room temperature for 1.5 hours. Brine (50 mL) and 2N HCl (1 drop) were added to quench the reaction, and the mixture was extracted with dichloromethane (10 mL  $\times$  3). The organic phases were then combined and dried over anhydrous Na<sub>2</sub>SO<sub>4</sub>. After filtration and removal of solvent, the residue was chromatographed on a silica gel column with a mixture of petroleum ether,



dichloromethane, and ethyl acetate ( $v : v : v = 6 : 3 : 1$ ) as the mobile phase to give the pure product **15** (60.2 mg, 74%).

**15**: red solid, m.p. 168 °C (decomposition).  $^1\text{H NMR}$  (400 MHz,  $\text{CDCl}_3$ , TMS):  $\delta$  7.43

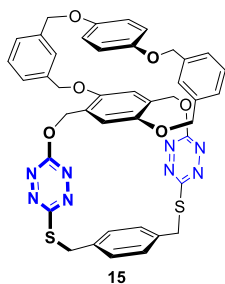

(s, 2H), 7.37-7.33 (m, 6H), 7.25-7.19 (m, 4H), 6.77 (s, 2H), 6.50 (s, 4H), 5.80 (d,  $J = 16.4$  Hz, 2H), 5.32 (d,  $J = 13.8$  Hz, 2H), 5.12 (d,  $J = 14.7$  Hz, 2H), 5.09 (d,  $J = 14.7$  Hz, 2H), 4.99 (d,  $J = 13.8$  Hz, 2H), 4.90 (d,  $J = 16.4$  Hz, 2H), 4.49 (d,  $J = 15.1$  Hz, 2H), 4.24 (d,  $J = 15.1$  Hz, 2H);  $^{13}\text{C NMR}$  (101 MHz,  $\text{CDCl}_3$ , TMS):  $\delta$  170.0, 165.6, 152.2, 149.8, 138.8, 137.9, 136.1, 129.1, 128.9, 126.8, 125.7, 125.0,

124.5, 115.9, 115.7, 70.0, 69.8, 65.6, 33.9. **IR** (KBr):  $\nu$  2922, 2852, 1504, 1481  $\text{cm}^{-1}$ .

**HRMS** (APCI) Calculated for  $[\text{M}+\text{H}]^+$ : 811.2116, Found: 811.2121. **HPLC**: ID column, 25 °C, 0.5 mL/min flow rate,  $\text{CHCl}_3 : i\text{PrOH} : \text{Hexane} = 3 : 1 : 6$ ,  $t_1 = 28.3$  min,  $[\alpha]_{\text{D}}^{25} = -11.0$  ( $c$  0.3, DCM),  $t_2 = 33.9$  min,  $[\alpha]_{\text{D}}^{25} = +11.0$  ( $c$  0.3, DCM).

Synthesis of **16**. Follow the general procedure. **13** (157.1 mg, 0.20 mmol) and **14** (34.1 mg, 0.20 mmol) were used. The resulting residue was chromatographed on a silica gel column with a mixture of petroleum ether, dichloromethane, and ethyl acetate ( $v : v : v = 7 : 2 : 1$ ) as the mobile phase to give pure product **16** (125.4 mg, 71%).

**16**: red solid, m.p. 262 °C (decomposition).  $^1\text{H NMR}$  (400 MHz,  $\text{CDCl}_3$ , TMS):  $\delta$  7.59-

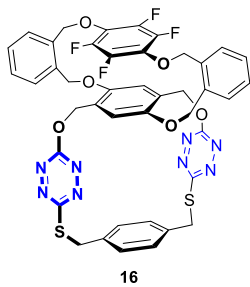

7.52 (m, 4H), 7.51-7.45 (m, 4H), 7.32 (s, 4H), 6.95 (s, 2H), 5.79 (d,  $J = 12.4$  Hz, 2H), 5.43 (d,  $J = 11.0$  Hz, 2H), 5.20 (d,  $J = 11.0$  Hz, 2H), 5.19 (d,  $J = 12.4$  Hz, 2H), 5.16 (s, 4H), 4.42 (d,  $J = 15.1$  Hz, 2H), 4.26 (d,  $J = 15.1$  Hz, 2H);  $^{13}\text{C NMR}$  (101 MHz,  $\text{CDCl}_3$ , TMS):  $\delta$  170.3, 165.4, 152.1, 140.4 (m), 135.9, 135.4, 135.1, 132.3 (m), 131.0, 130.8, 129.6, 129.2, 129.1, 125.1, 116.2, 74.9,

72.0, 64.7, 33.9.;  $^{19}\text{F NMR}$  (367 MHz,  $\text{DMSO}-d_6$ , 120 °C):  $\delta$  -157.4. **IR** (KBr):  $\nu$  2923, 2852, 1502, 1482  $\text{cm}^{-1}$ . **HRMS** (MALDI) Calculated for  $[\text{M}+\text{H}]^+$ : 883.1739, Found: 883.1742. **HPLC**: ID column, 25 °C, 0.5 mL/min flow rate, DCM : Hexane = 2 : 1,  $t_1 = 11.9$  min,  $[\alpha]_{\text{D}}^{25} = +4.7$  ( $c$  0.4, DCM),  $t_2 = 15.7$  min,  $[\alpha]_{\text{D}}^{25} = -4.7$  ( $c$  0.4, DCM).

Attempted construction of tetraoxa-linked homo corona[2]arene[2]tetrazine **SI-1**:

**Table S8.** The macrocyclization reaction between **10** and **SI-2**

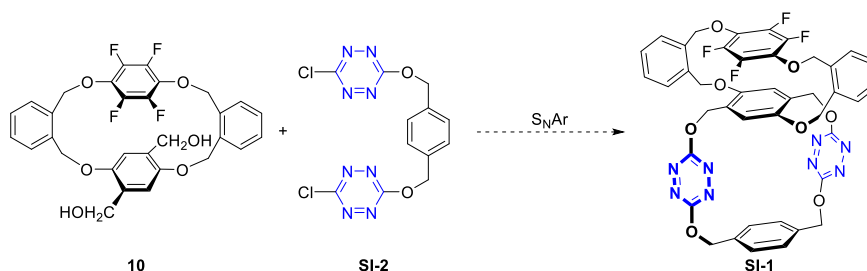

| Entry | Temp.  | Solv.              | Base (eq)  | Time        | Conc. | Results           |
|-------|--------|--------------------|------------|-------------|-------|-------------------|
| 1     | 40 °C  | THF                | DMAP (2.2) | 0.5 + 3.5 h | 5 mM  | N.R. <sup>a</sup> |
| 2     | 60 °C  | THF                | DMAP (2.2) | 4 + 8 h     | 5 mM  | N.R.              |
| 3     | 60 °C  | CH <sub>3</sub> CN | DMAP (2.2) | 12 h        | 5 mM  | N.D. <sup>b</sup> |
| 4     | 60 °C  | CHCl <sub>3</sub>  | DMAP (2.2) | 12 h        | 5 mM  | N.D.              |
| 5     | 140 °C | DMF                | DMAP (2.2) | 12 h        | 5 mM  | N.D.              |
| 6     | 140 °C | TCE                | DMAP (2.2) | 12 h        | 5 mM  | N.D.              |

<sup>a</sup> Diol **10** did not convert. <sup>b</sup> **SI-1** was not detected.

**Table S9.** The macrocyclization reaction between **13** and **SI-3**

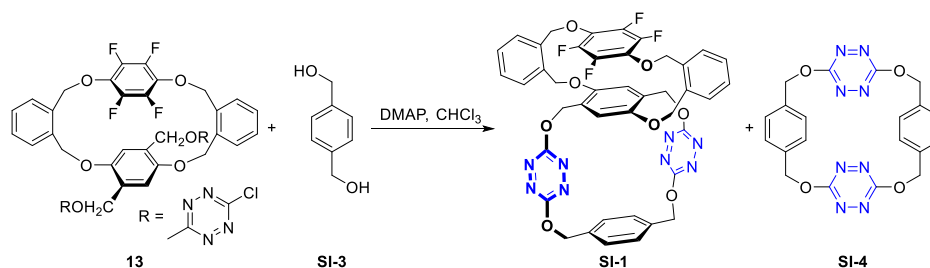

| Entry | Temp. | Solv.             | Base (eq)  | Time        | Conc.  | Yield [%] |      |
|-------|-------|-------------------|------------|-------------|--------|-----------|------|
|       |       |                   |            |             |        | SI-1      | SI-4 |
| 1     | 60 °C | CHCl <sub>3</sub> | DMAP (2.5) | 0.5 + 4.5 h | 2.5 mM | trace     | 20   |
| 2     | 40 °C | CHCl <sub>3</sub> | DMAP (2.5) | 2 + 22 h    | 2.5 mM | trace     | 30   |
| 3     | rt    | CHCl <sub>3</sub> | DMAP (2.5) | 12 + 24 h   | 2.5 mM | 3         | 15   |
| 4     | rt    | CHCl <sub>3</sub> | DMAP (5.0) | 12 + 12 h   | 2.5 mM | trace     | 11   |

The macrocyclization reaction between **13** and **SI-3** underwent a macrocycle-to-macrocycle transformation to give **SI-4**. Target compound **SI-1** was generated in poor yields. Characterization of **SI-4** has been reported earlier<sup>[5]</sup>.

## 2.4 Synthesis of intermediates 19-22

### Procedure A: Synthesis of dibromide 17-18

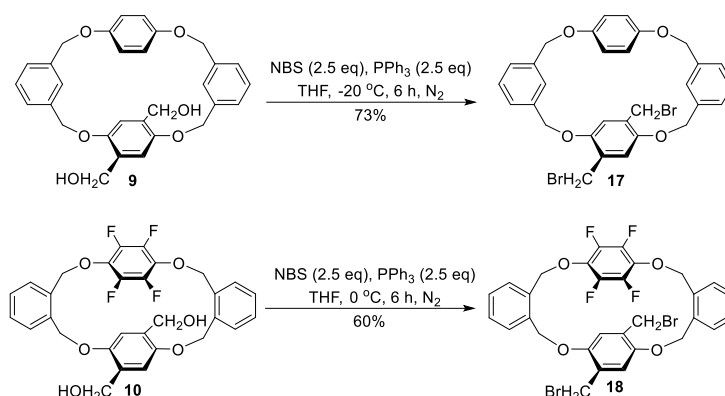

Synthesis of **17**. **9** (95.6 mg, 0.20 mmol), PPh<sub>3</sub> (131.1 mg, 0.50 mmol, 2.5 equiv.), NBS (89.0 mg, 0.50 mmol, 2.5 equiv.), and anhydrous tetrahydrofuran (10 mL) were put into a dry Schlenk tube under nitrogen atmosphere. The mixture was stirred at -20 °C for 6 hours. Brine (20 mL) were added to quench the reaction, and the mixture was extracted with ethyl acetate (20 mL  $\times$  3). The organic phases were then combined and dried over anhydrous Na<sub>2</sub>SO<sub>4</sub>. After filtration and removal of solvent, the residue was chromatographed on a silica gel column with a mixture of petroleum ether and dichloromethane ( $v : v = 1 : 4$ ) as the mobile phase to give the pure product **17** (88.7mg, 73%).

**17**: white solid, m.p. 205-207 °C. <sup>1</sup>H NMR (400 MHz, CDCl<sub>3</sub>, TMS):  $\delta$  7.42 (s, 2H),

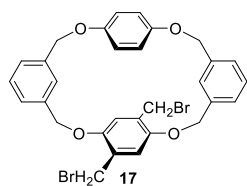

7.33 (dd,  $J = 7.6, 7.6$  Hz, 2H), 7.26 (d,  $J = 7.6$  Hz, 2H), 7.22 (d,  $J = 7.6$  Hz, 2H), 6.61 (s, 2H), 6.40 (s, 4H), 5.34 (d,  $J = 14.0$  Hz, 2H), 5.10 (d,  $J = 14.0$  Hz, 2H), 5.06 (d,  $J = 14.6$  Hz, 2H), 5.00 (d,  $J = 14.6$  Hz, 2H), 4.39 (d,  $J = 9.8$  Hz, 2H), 4.22 (d,  $J = 9.8$  Hz, 2H);

<sup>13</sup>C NMR (101 MHz, CDCl<sub>3</sub>, TMS):  $\delta$  152.3, 148.6, 139.0, 137.3, 129.0, 127.5, 126.6, 126.1, 125.2, 116.0, 115.2, 70.4, 69.2, 28.9. IR (KBr):  $\nu$  2920, 2850, 1659, 1633, 1504, 1469 cm<sup>-1</sup>. HRMS (APCI) Calculated for [M+H]<sup>+</sup>: 609.0271, Found: 609.0271.

Synthesis of **18**. Follow the general procedure. The reaction was conducted at 0 °C. **11** (679.2 mg, 1.26 mmol) was used. The residue was chromatographed on a silica gel column with a mixture of petroleum ether and dichloromethane ( $v : v = 7 : 3$ ) as the mobile phase to give the pure product **18** (514.2mg, 60%).

**18**: white solid, m.p. 218-219 °C.  $^1\text{H NMR}$  (400 MHz,  $\text{CDCl}_3$ , TMS):  $\delta$  7.58-7.54 (m, 2H), 7.50-7.43 (m, 6H), 6.82 (s, 2H), 5.45 (d,  $J = 11.0$  Hz, 2H), 5.29 (d,  $J = 11.0$  Hz, 2H), 5.16 (d,  $J = 11.0$  Hz, 2H), 5.05 (d,  $J = 11.0$  Hz, 2H), 4.40 (d,  $J = 10.0$  Hz, 2H), 4.30 (d,  $J = 10.0$  Hz, 2H);  $^{13}\text{C NMR}$  (101 MHz,  $\text{CDCl}_3$ , TMS):  $\delta$  151.0, 140.5 (dddd,  $J = 241, 17, 6, 4$  Hz), 135.4, 135.0, 132.9 (tt,  $J = 11, 3$  Hz), 130.9, 130.7, 129.5, 129.4, 128.4, 116.5, 75.6, 71.4, 27.4;  $^{19}\text{F NMR}$  (367 MHz,  $\text{DMSO}-d_6$ , 120 °C):  $\delta$  -157.5. **IR** (KBr):  $\nu$  2920, 2850, 1500, 1384  $\text{cm}^{-1}$ . **HRMS** (APCI) Calculated for  $[\text{M}-\text{H}]^-$ : 678.9748, Found: 678.9770. **HPLC** IB column, 25 °C, 0.5 mL/min flow rate,  $^i\text{PrOH} : \text{Hexane} = 1 : 4$ ,  $t_1 = 15.2$  min,  $t_2 = 16.3$  min.

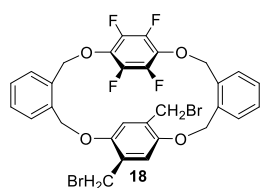

**Table S10.** Optimization of the synthesis of **17** and **18**

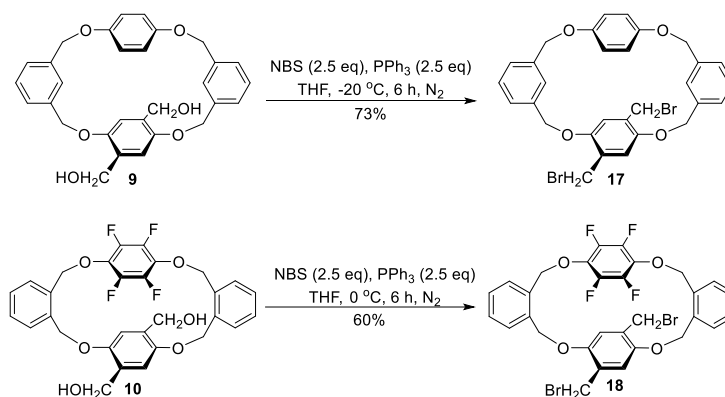

| Entry | Substrate | [Br] (eq)                                         | Temp.         | Solv.      | Time       | Yields [%] |
|-------|-----------|---------------------------------------------------|---------------|------------|------------|------------|
| 1     | <b>9</b>  | NBS (2.5), $\text{PPh}_3$ (2.5)                   | 0 °C          | THF        | 6 h        | 65         |
| 2     | <b>9</b>  | <b>NBS (2.5), <math>\text{PPh}_3</math> (2.5)</b> | <b>-20 °C</b> | <b>THF</b> | <b>6 h</b> | <b>73</b>  |
| 3     | <b>9</b>  | NBS (2.5), $\text{PPh}_3$ (2.5)                   | -40 °C        | THF        | 6 h        | 70         |
| 4     | <b>10</b> | NBS (2.5), $\text{PPh}_3$ (2.5)                   | rt            | THF        | 4 h        | 54         |
| 5     | <b>10</b> | <b>NBS (2.5), <math>\text{PPh}_3</math> (2.5)</b> | <b>0 °C</b>   | <b>THF</b> | <b>6 h</b> | <b>60</b>  |
| 6     | <b>10</b> | NBS (2.5), $\text{PPh}_3$ (2.5)                   | -20 °C        | THF        | 6 h        | 42         |

## Procedure B: Synthesis of dithiols **19** and **20**

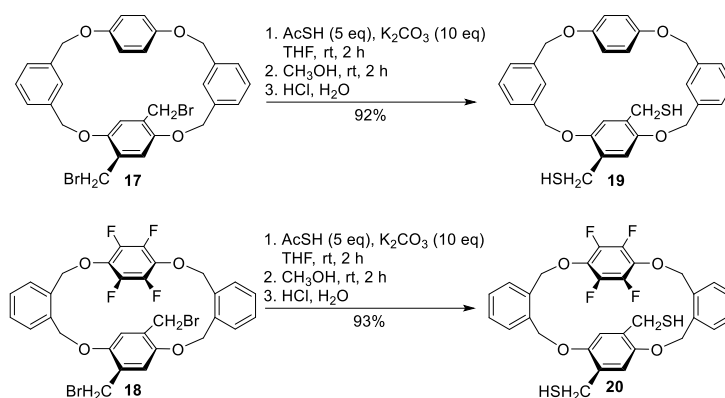

Synthesis of **19**. Tetrahydrofuran, methanol, and diluted hydrochloric acid were bubbled with nitrogen for 30 minutes. **17** (396.7 mg, 0.65 mmol), K<sub>2</sub>CO<sub>3</sub> (898.4 mg, 6.50 mmol, 10 equiv.), anhydrous tetrahydrofuran (13 mL), and thioacetic acid (0.23 mL, 3.25 mmol, 5 eq) were put into a dry 100 mL dry two-necked round bottom flask under nitrogen atmosphere. After stirring vigorously at room temperature for 2 hours, the mixture was added with anhydrous methanol (13 mL) and stirred for another 2 hours. 2N HCl (6.5 mL) and brine (50 mL) were added to quench the reaction, and the mixture was extracted with ethyl acetate (50 mL × 3). The organic phases were then combined and evaporated to remove methanol. Then the residue was extracted again with brine (50 mL) and ethyl acetate (50 mL × 3). The combined organic phases were dried over anhydrous Na<sub>2</sub>SO<sub>4</sub>. After filtration and removal of solvent, the residue was recrystallized with petroleum ether and dichloromethane to give the pure product **19** (309.4 mg, 92%).

**19**: white solid, m.p. 146-148 °C. <sup>1</sup>H NMR (400 MHz, CDCl<sub>3</sub>, TMS): δ 7.42 (s, 2H), 7.32 (dd, *J* = 7.6, 7.6 Hz, 2H), 7.25 (d, *J* = 7.6 Hz, 2H), 7.19 (d, *J* = 7.6 Hz, 2H), 6.53 (s, 2H), 6.40 (s, 4H), 5.28 (d, *J* = 13.8 Hz, 2H), 5.08 (d, *J* = 13.8 Hz, 2H), 5.03 (s, 4H), 3.61 (dd, *J* = 13.0, 7.0 Hz, 2H, CH<sub>a</sub>H<sub>b</sub>SH), 3.35 (d, *J* = 13.0, 8.2 Hz, 2H, CH<sub>a</sub>H<sub>b</sub>SH), 1.62 (dd, *J* = 8.2, 7.0 Hz, 2H, CH<sub>2</sub>SH); <sup>13</sup>C NMR (101 MHz, CDCl<sub>3</sub>, TMS): δ 152.4, 148.0, 138.9, 137.9, 129.2, 128.9, 126.5, 125.8, 125.1, 116.0, 113.8, 70.4, 69.1, 24.0. IR (KBr): ν 2920, 2850, 1504, 1469, 1202 cm<sup>-1</sup>. HRMS (APCI) Calculated for [M-H]<sup>-</sup>: 515.1356, Found: 515.1356.

Synthesis of **20**. Follow the general procedure. **18** (409.4 mg, 0.6 mmol) was used to give **20** (330.0 mg, 93%).

**20**: white solid, m.p. 207-210 °C. <sup>1</sup>H NMR (400 MHz, CDCl<sub>3</sub>, TMS): δ 7.56-7.52 (m, 2H), 7.49-7.42 (m, 6H), 6.75 (s, 2H), 5.45 (d, *J* = 11.4 Hz, 2H), 5.24 (d, *J* = 11.0 Hz, 2H), 5.19 (d, *J* = 11.4 Hz, 2H), 5.04 (d, *J* = 11.0 Hz, 2H), 3.72 (dd, *J* = 13.4, 7.2 Hz, 2H, CH<sub>a</sub>H<sub>b</sub>SH), 3.42 (dd, *J* = 13.4, 8.6 Hz, 2H, CH<sub>a</sub>H<sub>b</sub>SH), 1.68 (dd, *J* = 8.6, 7.2 Hz, 2H, CH<sub>2</sub>SH); <sup>13</sup>C NMR (101 MHz, CDCl<sub>3</sub>, TMS): δ 150.5, 140.2 (m), 135.3, 135.3, 132.6 (tt, *J* = 9, 2 Hz), 130.7, 130.6, 129.8, 129.4, 129.1, 115.0, 75.4, 71.3, 23.0; <sup>19</sup>F NMR (367 MHz, DMSO-*d*<sub>6</sub>, 120 °C): δ -156.9. IR (KBr): ν 2954, 2920, 2850, 1499 cm<sup>-1</sup>. HRMS (APCI) Calculated for [M+H]<sup>+</sup>: 589.1125, Found: 589.1131. HPLC IA column, 25 °C, 0.5 mL/min flow rate, CHCl<sub>3</sub> : *i*-PrOH : Hexane = 27 : 9 : 164, *t*<sub>1</sub> = 11.3 min, *t*<sub>2</sub> = 16.1 min.

### Procedure C: Synthesis of **21** and **22**

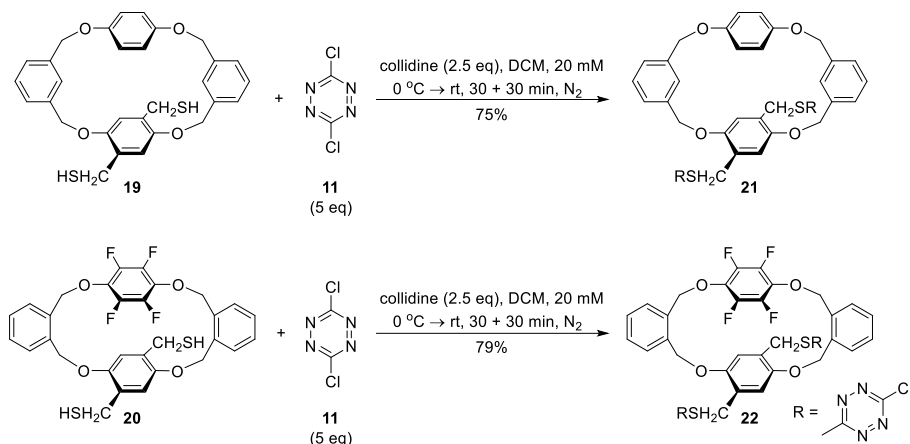

Synthesis of **21**. **11** (226.4 mg, 1.50 mmol, 5 equiv.) and anhydrous dichloromethane (10 mL) were put into a 50 mL dry two-necked round bottom flask under nitrogen atmosphere. To this solution in an ice bath was added first collidine (99 μL, 0.75 mmol, 2.5 equiv.) and subsequently dropwise a solution of **19** (155.0 mg, 0.30 mmol, 1 equiv.) in anhydrous dichloromethane (5 mL) over 30 minutes. The resulting dark red mixture was warmed to room temperature and stirred for 30 minutes. Brine (50 mL) and 2N HCl (0.4 mL) were added to quench the reaction, and the mixture was extracted with dichloromethane (50 mL × 3). The organic phases were then combined and dried over

anhydrous  $\text{Na}_2\text{SO}_4$ . After filtration and removal of solvent, the residue was chromatographed on a silica gel column with a mixture of petroleum ether, dichloromethane, and ethyl acetate ( $v : v : v = 6 : 3 : 1$ ) as the mobile phase to give the pure product **21** (167.2 mg, 75%).

**21**: red solid, m.p. 87-90 °C.  $^1\text{H NMR}$  (400 MHz,  $\text{CDCl}_3$ , TMS):  $\delta$  7.42 (s, 2H), 7.33

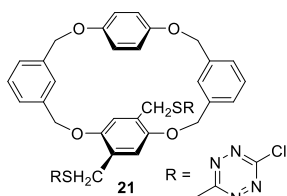

(dd,  $J = 7.5, 7.5$  Hz, 2H), 7.25 (d,  $J = 7.5$  Hz, 2H), 7.17 (d,  $J = 7.5$  Hz, 2H), 6.75 (s, 2H), 6.23 (s, 4H), 5.35 (d,  $J = 14.4$  Hz, 2H), 5.08 (d,  $J = 14.4$  Hz, 2H), 5.01 (d,  $J = 14.6$  Hz, 2H), 4.97 (d,  $J = 14.6$  Hz, 2H), 4.35 (d,  $J = 13.6$  Hz, 2H), 4.30 (d,

$J = 13.6$  Hz, 2H);  $^{13}\text{C NMR}$  (101 MHz,  $\text{CDCl}_3$ , TMS):  $\delta$  175.8, 165.4, 152.5, 148.7, 139.1, 137.4, 129.0, 125.9, 125.8, 124.6, 124.4, 116.0, 114.8, 70.6, 69.3, 30.0. **IR** (KBr):  $\nu$  2922, 2852, 1504, 1230  $\text{cm}^{-1}$ . **HRMS** (ESI) Calculated for  $[\text{M}+\text{Na}]^+$  : 767.0788, Found: 767.0782. **HPLC** IB column, 25 °C, 0.5 mL/min flow rate, DCM : Hexane = 2 : 3,  $t_1 = 11.2$  min,  $t_2 = 12.2$  min.

Synthesis of **22**. Follow the general procedure. **20** (235.5 mg, 0.40 mmol) was used. The residue was chromatographed on a silica gel column with dichloromethane as the mobile phase to give the pure product **22** (235.5 mg, 79%).

**22**: red solid, m.p. 109-111 °C.  $^1\text{H NMR}$  (400 MHz,  $\text{CDCl}_3$ , TMS):  $\delta$  7.57-7.54 (m,

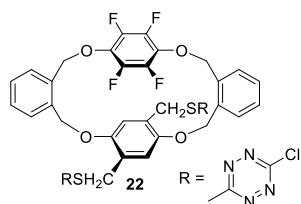

2H), 7.49-7.40 (m, 6H), 6.98 (s, 2H), 5.44 (d,  $J = 11.4$  Hz, 2H), 5.26 (d,  $J = 11.4$  Hz, 2H), 5.17 (d,  $J = 11.4$  Hz, 2H), 5.06 (d,  $J = 11.4$  Hz, 2H), 4.39 (d,  $J = 13.2$  Hz, 2H), 4.31 (d,  $J = 13.2$  Hz, 2H);  $^{13}\text{C NMR}$  (101 MHz,  $\text{CDCl}_3$ , TMS):  $\delta$  175.6, 165.7,

151.2, 140.2 (m), 135.1, 134.9, 132.4 (m), 130.8, 130.7, 129.5, 129.3, 125.2, 116.1, 75.1, 71.3, 29.7;  $^{19}\text{F NMR}$  (376 MHz,  $\text{DMSO}-d_6$ , 120 °C)  $\delta$  -156.7. **IR** (KBr):  $\nu$  2923, 2852, 1502, 1232  $\text{cm}^{-1}$ . **HRMS** (APCI) Calculated for  $[\text{M}+\text{H}]^+$ : 817.0591, Found: 817.0588. **HPLC** IB column, 25 °C, 0.5 mL/min flow rate, DCM : Hexane = 2 : 3,  $t_1 = 11.8$  min,  $t_2 = 12.8$  min.

## 2.5 Synthesis of bispirophanes 23-26

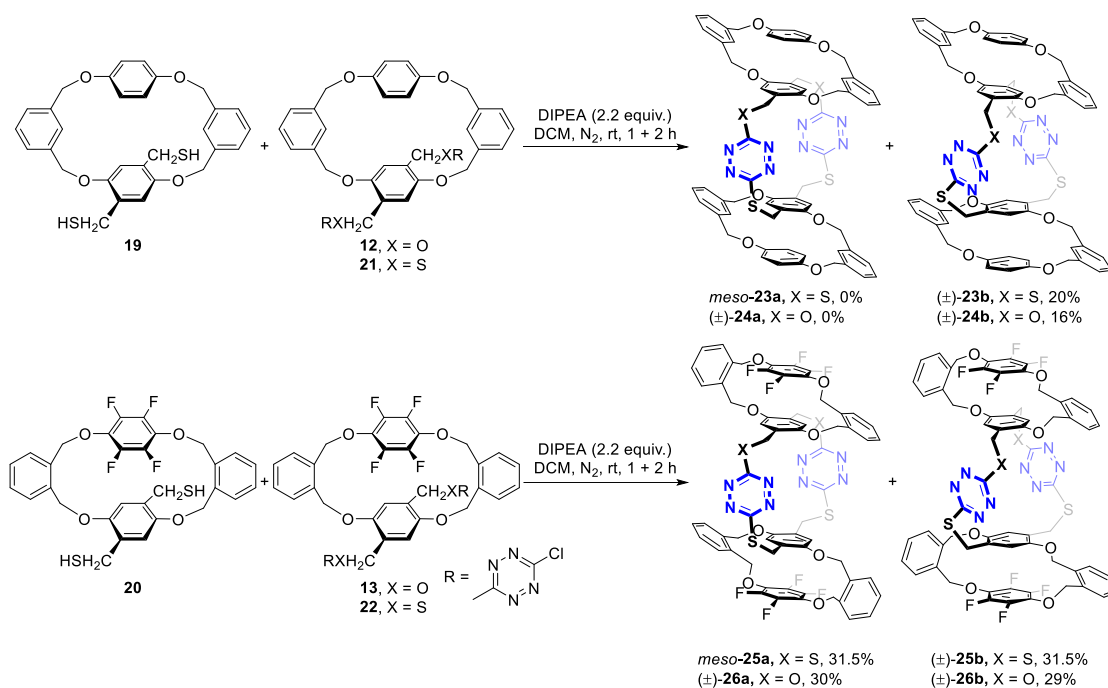

**General Procedure:** DIPEA (38  $\mu$ L, 0.22 mmol, 2.2 equiv.) and anhydrous dichloromethane (10 mL) were put into a 50 mL dry two-necked round bottom flask under nitrogen atmosphere. To this solution was added dropwise a solution of dithiols (0.10 mmol, 1 equiv.) and 6-chloro-*s*-tetrazine-appended macrocycles (0.10 mmol, 1 equiv.) in anhydrous dichloromethane (10 mL) over 1 hour. The resulting red mixture was stirred at room temperature for 2 hours. Brine (50 mL) and 2N HCl (1 drop) were added to quench the reaction, and the mixture was extracted with dichloromethane (10 mL  $\times$  3). The organic phases were then combined and dried over anhydrous Na<sub>2</sub>SO<sub>4</sub>. After filtration and removal of solvent, the residue was chromatographed on a silica gel column or thin layer chromatography to give pure bispirophanes.

**23b:** 23.7 mg, 20%. Separated by column with a mixture of petroleum ether,

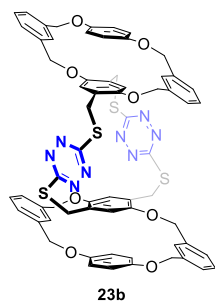

dichloromethane, and ethyl acetate ( $v : v : v = 6 : 3 : 1$ ) as the mobile phase. Red solid, m.p. 172-174  $^{\circ}$ C. **<sup>1</sup>H NMR** (400 MHz, CDCl<sub>3</sub>, TMS):  $\delta$  7.40 (s, 4H), 7.31 (dd,  $J = 7.6, 7.6$  Hz, 4H), 7.19 (d,  $J = 7.6$  Hz, 4H), 7.17 (d,  $J = 7.6$  Hz, 4H), 6.75 (s, 4H), 6.46 (s, 8H), 5.07 (d,  $J = 15.3$  Hz, 4H), 5.07 (d,  $J = 15.3$  Hz, 4H), 4.80 (d,  $J = 13.5$  Hz, 2H), 4.65 (d,  $J = 13.5$  Hz, 2H), 4.65 (d,  $J = 15.1$  Hz, 2H), 3.52 (d,  $J = 15.1$  Hz, 2H); **<sup>13</sup>C NMR** (101 MHz, CDCl<sub>3</sub>, TMS):  $\delta$  172.0, 152.3, 148.8, 138.7,



137.7, 128.9, 127.3, 125.7, 125.5, 115.9, 114.6, 70.1, 69.6, 29.3. **IR** (KBr):  $\nu$  2921, 2851, 1504, 1461, 1229, 1202  $\text{cm}^{-1}$ . **HRMS** (APCI) Calculated for  $[\text{M}+\text{H}]^+$ : 1189.2864, Found: 1189.2867. **HPLC**: IA column, 25 °C, 0.5 mL/min flow rate,  $\text{CHCl}_3$  : *i*PrOH : Hexane = 3 : 1 : 21,  $t_1$  = 18.6 min,  $[\alpha]_{\text{D}}^{25}$  = -10.5 (*c* 0.5, DCM),  $t_2$  = 24.1 min,  $[\alpha]_{\text{D}}^{25}$  = +10.5 (*c* 0.5, DCM).

**24b**: 18.3 mg, 16%. Separated by thin layer chromatography with a mixture of petroleum ether, dichloromethane, and ethyl acetate ( $\nu$  :  $\nu$  :  $\nu$  = 6 : 3 :

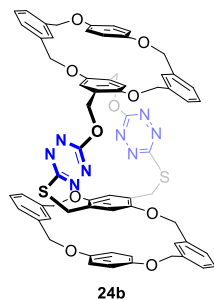

1) as the mobile phase ( $R_f$  = 0.36). Red solid, m.p. 166-168 °C.  **$^1\text{H}$  NMR** (400 MHz,  $\text{CDCl}_3$ , TMS):  $\delta$  7.41 (s, 2H), 7.38 (s, 2H), 7.33-7.29 (m, 6H), 7.22-7.17 (m, 6H), 6.79 (s, 2H), 6.67 (s, 2H), 6.52 (s, 4H), 6.40 (s, 4H), 6.13 (d,  $J$  = 12.6 Hz, 2H), 5.11 – 5.04 (m, 10H), 4.84 (d,  $J$  = 14.3 Hz, 2H), 4.80 (d,  $J$  = 13.8 Hz, 2H), 4.71 (d,  $J$  = 12.6

Hz, 2H), 4.61 (d,  $J$  = 13.8 Hz, 2H), 4.40 (d,  $J$  = 14.3 Hz, 2H), 3.67 (d,  $J$  = 14.3 Hz, 2H);  **$^{13}\text{C}$  NMR** (101 MHz,  $\text{CDCl}_3$ , TMS):  $\delta$  171.0, 165.2, 152.4, 152.2, 149.2, 148.4, 138.8, 138.7, 137.8, 137.6, 129.0, 128.9, 127.2, 127.1, 126.1, 125.8, 125.7, 125.4, 125.2, 125.2, 115.9, 115.8, 115.6, 114.2, 70.3, 69.8, 69.6, 69.4, 64.6, 30.4. **IR** (KBr):  $\nu$  2923, 2852, 1504, 1478  $\text{cm}^{-1}$ . **HRMS** (APCI) Calculated for  $[\text{M}+\text{H}]^+$ : 1157.3321, Found: 1157.3320. **HPLC**: IA column, 25 °C, 0.5 mL/min flow rate,  $\text{CHCl}_3$  : *i*PrOH : Hexane = 9 : 3 : 28,  $t_1$  = 14.4 min,  $[\alpha]_{\text{D}}^{25}$  = -11.0 (*c* 0.5, DCM),  $t_2$  = 22.5 min,  $[\alpha]_{\text{D}}^{25}$  = +11.0 (*c* 0.5, DCM).

Column chromatography with dichloromethane as the mobile phase gave a mixture of **25a** and **25b** (82.2 mg, 63%). The later compound was obtained as high-quality single crystals from recrystallization of a mixed sample in toluene and *n*-hexane.

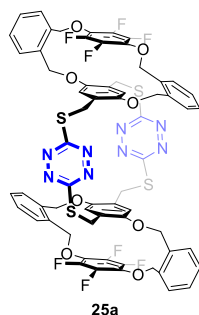

**25a**: red solid.  **$^1\text{H}$  NMR** (400 MHz,  $\text{CDCl}_3$ , TMS):  $\delta$  7.60-7.57 (m, 4H), 7.50-7.43 (m, 12H), 7.14 (d,  $J$  = 7.4 Hz, 2H), 6.89 (s, 4H), 5.36 (d,  $J$  = 11.5 Hz, 4H), 5.13 (d,  $J$  = 11.5 Hz, 4H), 5.01 (s, 8H), 4.38 (d,  $J$  = 14.7 Hz, 4H), 3.92 (d,  $J$  = 14.7 Hz, 2H). **HRMS** (ESI) Calculated for  $[\text{M}+\text{Na}]^+$ : 1355.1929, Found: 1355.1951.

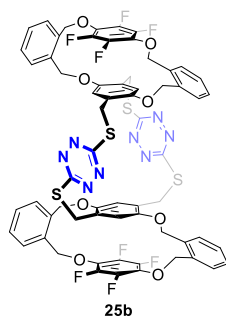

**25b:** red solid.  $^1\text{H NMR}$  (400 MHz,  $\text{CDCl}_3$ , TMS):  $\delta$  7.62-7.57 (m, 4H), 7.49-7.42 (m, 4H), 7.41-7.36 (m, 4H), 7.19 (d,  $J = 7.8$  Hz, 4H), 6.82 (s, 4H), 5.38 (d,  $J = 11.4$  Hz, 4H), 5.12 (d,  $J = 11.4$  Hz, 4H), 4.95 (d,  $J = 12.0$  Hz, 4H), 4.92 (d,  $J = 12.0$  Hz, 4H), 4.50 (d,  $J = 15.6$  Hz, 4H), 3.86 (d,  $J = 15.6$  Hz, 4H). **HRMS** (ESI) Calculated for  $[\text{M}+\text{Na}]^+$ : 1355.1929, Found: 1355.1951.

**26a:** 39.2 mg, 30%. Separated by thin layer chromatography with dichloromethane as the mobile phase ( $R_f = 0.32$ ). Red solid, m.p. 255 °C (decomposition).

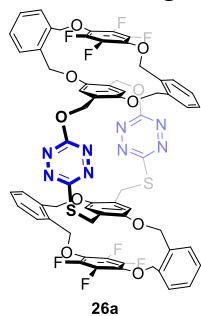

$^1\text{H NMR}$  (400 MHz,  $\text{CDCl}_3$ , TMS):  $\delta$  7.67 (d,  $J = 7.4$  Hz, 2H), 7.54-7.34 (m, 12H), 7.14 (d,  $J = 7.4$  Hz, 2H), 6.86 (s, 2H), 6.74 (s, 2H), 5.84 (d,  $J = 12.8$  Hz, 2H), 5.37 (d,  $J = 11.2$  Hz, 2H), 5.37 (d,  $J = 12.0$  Hz, 2H), 5.14 – 5.00 (m, 8H), 5.17 (d,  $J = 11.2$  Hz, 2H), 4.83 (d,  $J = 12.0$  Hz, 2H), 4.77 (d,  $J = 11.2$  Hz, 2H), 4.42 (d,  $J = 15.6$  Hz, 2H), 3.74 (d,  $J = 15.6$  Hz, 2H);  $^{13}\text{C NMR}$  (101 MHz,  $\text{CDCl}_3$ , TMS):  $\delta$  170.9, 165.4, 152.0, 151.9, 141.1 (m), 140.4 (m), 136.0, 135.4, 135.1, 135.0, 132.4, 132.1, 130.8, 130.8, 130.5, 129.6, 129.4, 129.2, 129.2, 126.8, 125.4, 116.7, 114.9, 75.1, 74.1, 72.6, 71.9, 64.7, 28.5;  $^{19}\text{F NMR}$  (376 MHz,  $\text{CDCl}_3$ )  $\delta$  -156.7, -157.0, -157.5. **IR** (KBr):  $\nu$  2922, 2852, 1501, 1485  $\text{cm}^{-1}$ . **HRMS** (APCI) Calculated for  $[\text{M}+\text{H}]^+$ : 1301.2567, Found: 1301.2587. **HPLC**: IA column, 25 °C, 0.5 mL/min flow rate,  $\text{CHCl}_3$  :  $i$ PrOH : Hexane = 1 : 1 : 8,  $t_1 = 18.3$  min,  $[\alpha]_D^{25} = +4.1$  ( $c$  0.5, DCM),  $t_2 = 24.0$  min,  $[\alpha]_D^{25} = -4.1$  ( $c$  0.5, DCM).

**26b:** 38.1 mg, 29%. Separated by thin layer chromatography with dichloromethane as the mobile phase ( $R_f = 0.30$ ). red solid, m.p. 253 °C (decomposition).

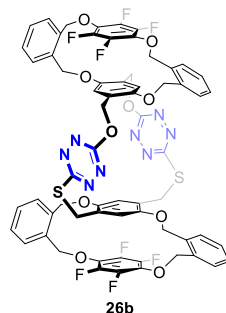

$^1\text{H NMR}$  (400 MHz,  $\text{CDCl}_3$ , TMS):  $\delta$  7.65 (d,  $J = 7.6$  Hz, 2H), 7.58 (dd,  $J = 7.2, 1.4$  Hz, 2H), 7.53 (dd,  $J = 7.2, 2.0$  Hz, 2H), 7.48 – 7.37 (m, 8H), 7.20 (dd,  $J = 7.2, 1.4$  Hz, 2H), 6.82 (s, 2H), 6.74 (s, 2H), 5.92 (d,  $J = 12.6$  Hz, 2H), 5.42 (d,  $J = 11.4$  Hz, 2H), 5.37 (d,  $J = 11.8$  Hz, 2H), 5.19 (d,  $J = 11.4$  Hz, 2H), 5.14 (d,  $J = 12.6$  Hz, 2H), 5.14 (d,  $J = 11.8$  Hz, 2H), 5.09 (d,  $J = 11.4$  Hz, 2H), 5.04 (d,  $J = 12.0$  Hz, 2H), 4.88 (d,  $J = 12.0$  Hz, 2H), 4.82 (d,  $J = 11.4$  Hz, 2H), 4.41 (d,  $J = 14.6$  Hz, 2H), 3.79 (d,  $J = 14.6$  Hz, 2H);  $^{13}\text{C NMR}$  (101 MHz,  $\text{CDCl}_3$ , TMS):  $\delta$  171.0, 165.3, 152.1, 151.1, 140.4 (m),

140.4 (m), 135.6, 135.2, 135.1, 134.9, 132.3 (m), 132.1 (m), 130.9, 130.8, 130.7, 129.6, 129.5, 129.2, 129.0, 126.7, 125.3, 117.1, 115.6, 75.0, 74.3, 71.9, 71.8, 64.6, 29.1;  $^{19}\text{F}$  NMR (376 MHz,  $\text{CDCl}_3$ )  $\delta$  -156.0, -157.3, -157.8. IR (KBr):  $\nu$  2922, 2852, 1501, 1485  $\text{cm}^{-1}$ . HRMS (APCI) Calculated for  $[\text{M}+\text{H}]^+$ : 1301.2567, Found: 1301.2587. HPLC: IA column, 25  $^\circ\text{C}$ , 0.5 mL/min flow rate,  $\text{CHCl}_3$  :  $i$ PrOH : Hexane = 3 : 1 : 21,  $t_1$  = 22.4 min,  $[\alpha]_{\text{D}}^{25}$  = +15.9 ( $c$  0.5, DCM),  $t_2$  = 27.8 min,  $[\alpha]_{\text{D}}^{25}$  = -15.9 ( $c$  0.5, DCM).

**25a** and **25b** were also prepared from the direct reaction of **20** and **11**.

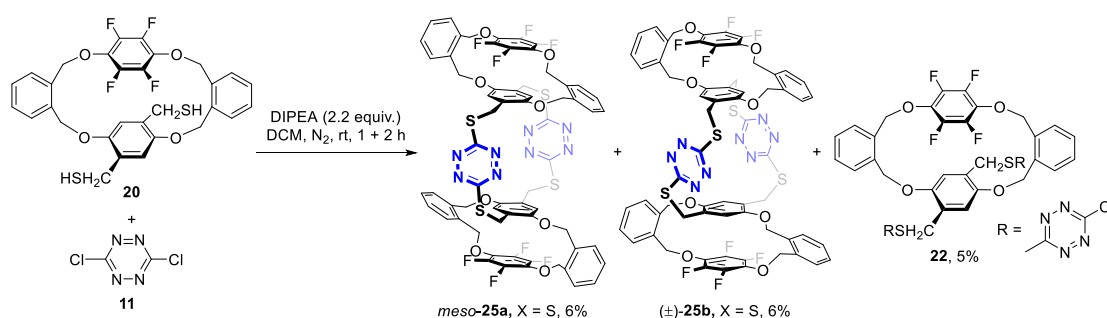

DIPEA (19  $\mu\text{L}$ , 0.11 mmol, 2.2 equiv.) and anhydrous dichloromethane (5 mL) were put into a 50 mL dry two-necked round bottom flask under nitrogen atmosphere. To this solution was added dropwise a solution of **20** (29.4 mg, 0.05 mmol, 1 equiv.) and **11** (7.5 mg, 0.05 mmol, 1 equiv.) in anhydrous dichloromethane (5 mL) over 1 hour. The resulting red mixture was stirred at room temperature for 2 hours. Brine (20 mL) and 2N HCl (1 drop) were added to quench the reaction, and the mixture was extracted with dichloromethane (10 mL  $\times$  3). The organic phases were then combined and dried over anhydrous  $\text{Na}_2\text{SO}_4$ . After filtration and removal of solvent, the residue was chromatographed on a silica gel column with a mixture of petroleum ether and dichloromethane ( $v : v = 2 : 1 - 4 : 1$ ) to give first **22** (1.8 mg, 5%) and then a mixture of **25a** and **25b** (4.0 mg, 12%).

### 3. Molecular Structures and Crystallographic Data

**Table S11.** Conditions of crystal cultivation

|                 |                                      |                                       |                                             |                                 |
|-----------------|--------------------------------------|---------------------------------------|---------------------------------------------|---------------------------------|
| <b>Compound</b> | <b>(±)-7a</b>                        | <b>7b</b>                             | <b>7c</b>                                   | <b>P-7d</b>                     |
| Solv.           | DCE/ <i>n</i> -Heptane               | EA/ <i>n</i> -Heptane                 | THF/ <i>n</i> -Hexane                       | DCM/ <i>n</i> -Hexane           |
| <b>Compound</b> | <b>7e</b>                            | <b>7f</b>                             | <b>(±)-8</b>                                | <b>(±)-15</b>                   |
| Solv.           | DCE/ <i>n</i> -Heptane               | THF/ <i>n</i> -Hexane                 | EA/ <i>n</i> -Hexane                        | DCE/ <i>n</i> -Hexane           |
| <b>Compound</b> | <b>M-15</b>                          | <b>(±)-16</b>                         | <b>(±)-25b</b>                              | <b>(±)-26a</b>                  |
| Solv.           | CHCl <sub>3</sub> / <i>n</i> -Hexane | Acetone/ <i>n</i> -Hexane             | Toluene/ <i>n</i> -Hexane                   | THF/ <i>n</i> -Hexane           |
| <b>Compound</b> | <b>P,M-26a</b>                       | <b>(±)-26b</b>                        | <b>P,P-26b</b>                              | <b>(±)-25b·H<sub>3</sub>OCl</b> |
| Solv.           | THF/ <i>n</i> -Hexane                | CH <sub>3</sub> CN/CH <sub>3</sub> OH | THF/ <i>n</i> -Hexane                       | DCE/CH <sub>3</sub> OH          |
| <b>Compound</b> | <b>(±)-15·3TTF</b>                   |                                       | <b>(±)-16·2TTF</b>                          |                                 |
| Solv.           | Acetone&DCE/ <i>n</i> -Hexane        |                                       | CHCl <sub>3</sub> / <i>n</i> -Hexane -25 °C |                                 |
| <b>Compound</b> | <b>(±)-16·TTF</b>                    |                                       | <b>M-16·TTF</b>                             | <b>P-16·TTF</b>                 |
| Solv.           | THF&1,4-dioxane/ <i>n</i> -Hexane    |                                       | DCE/ <i>n</i> -Hexane                       | DCE/ <i>n</i> -Heptane          |

### 3.1 Molecular structures of homo *i*-corona[4]arenes

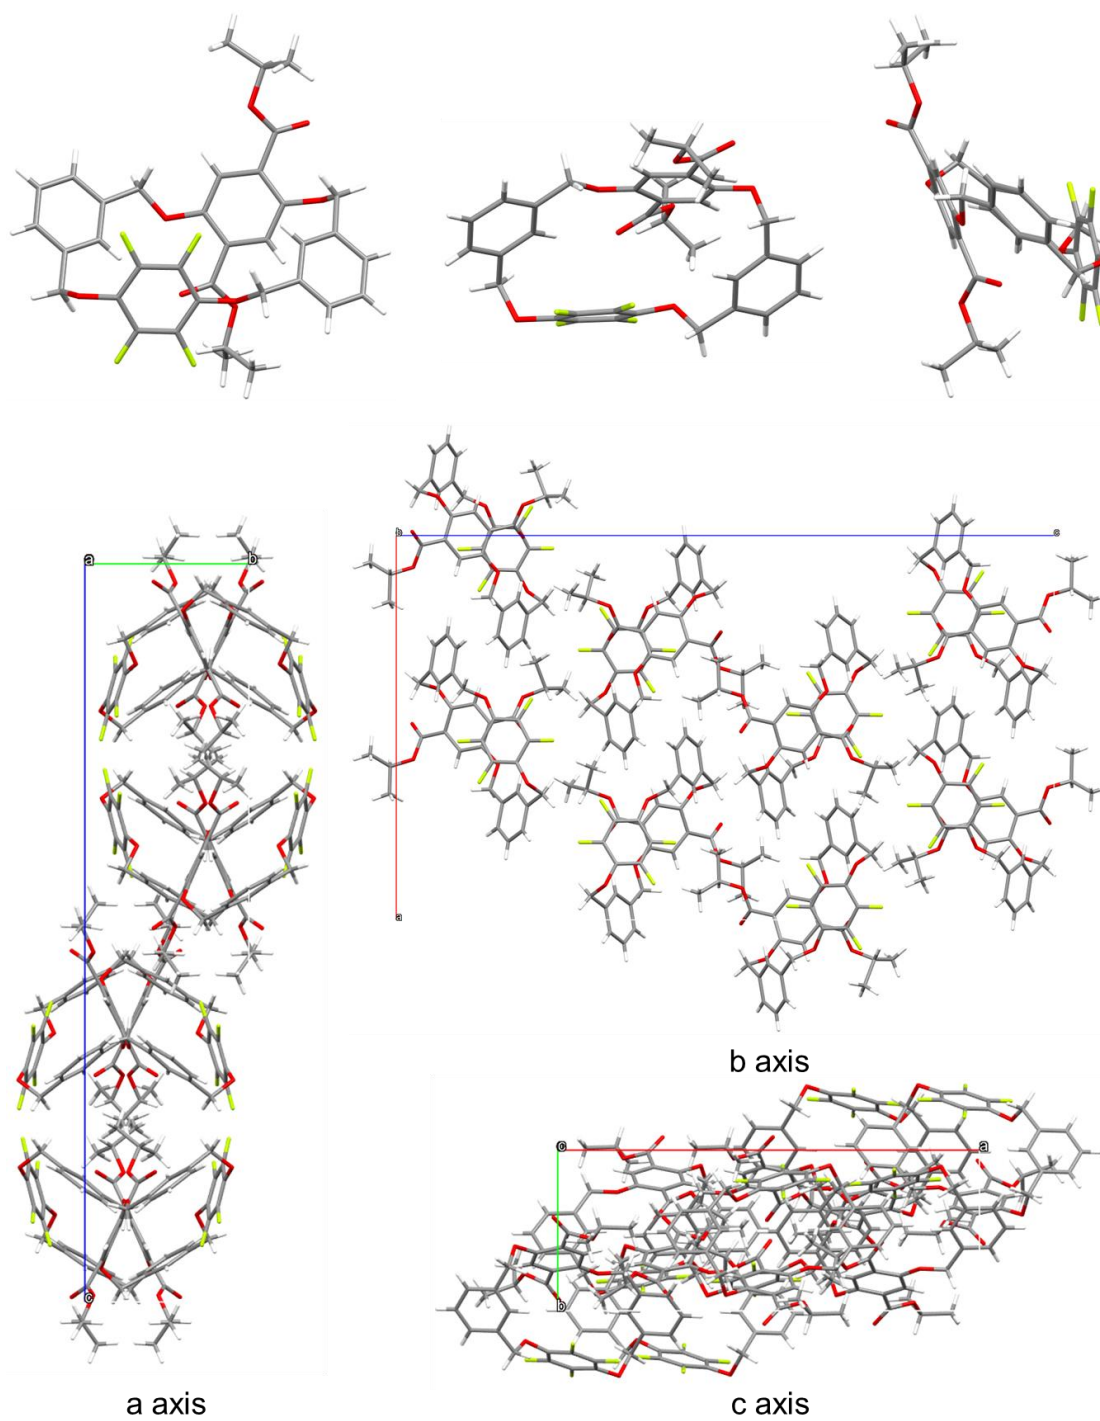

**Figure S1A.** X-Ray molecular structures of *race-7a* with three different views (top) and packing models of *race-7a* viewed from three different axes (bottom). Disordered structures are omitted for clarity.

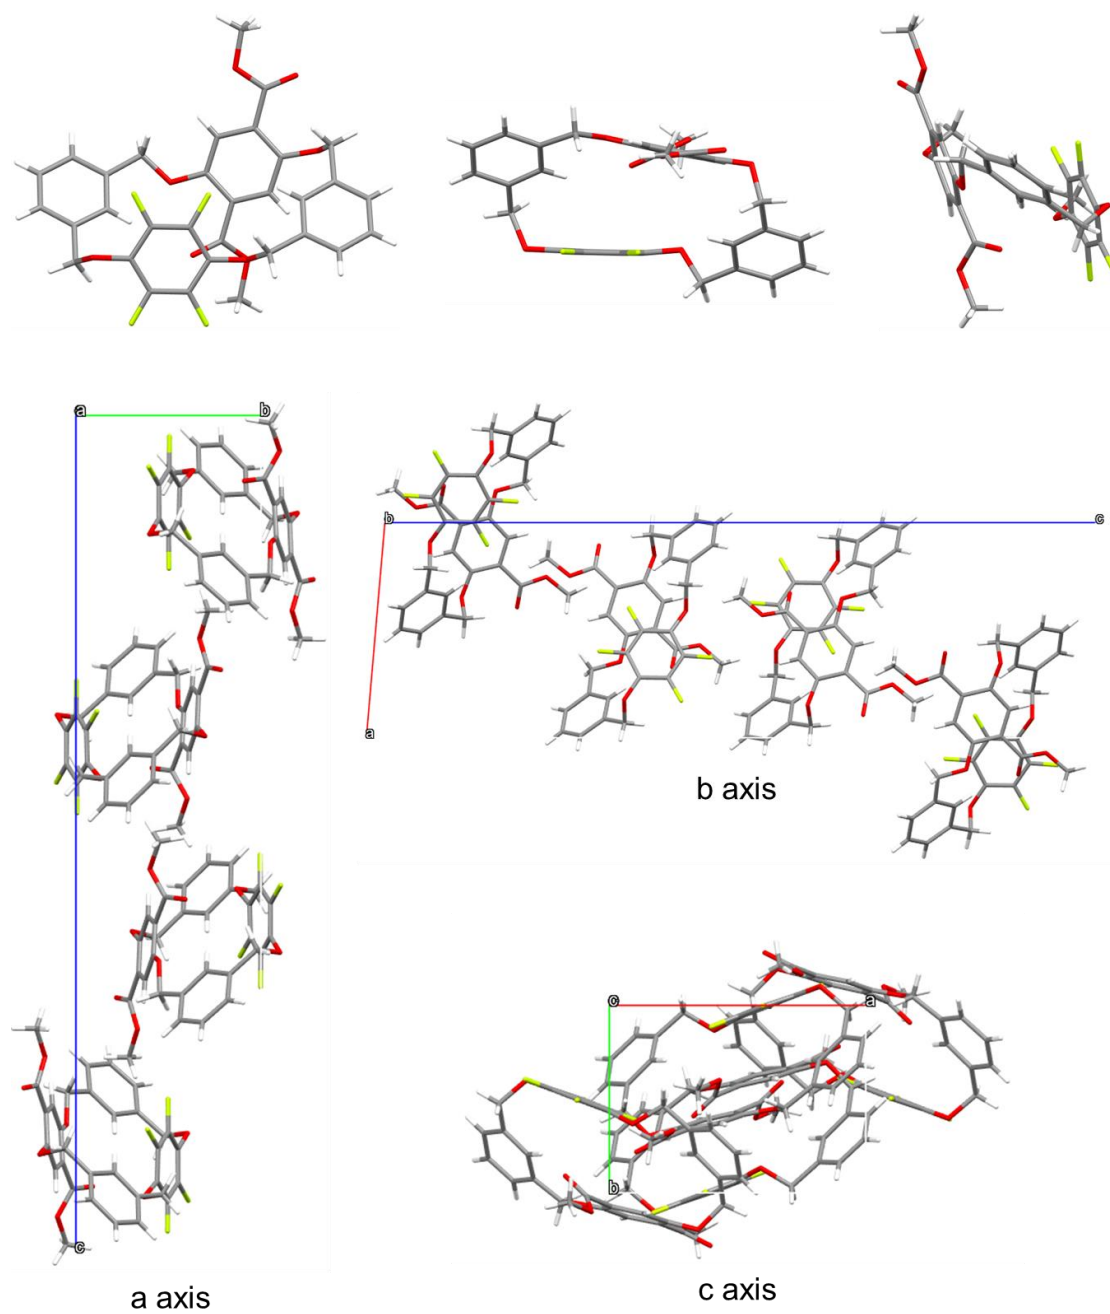

**Figure S1B.** X-Ray molecular structures of **7b** with three different views (top) and packing models of **7b** viewed from three different axes (bottom).

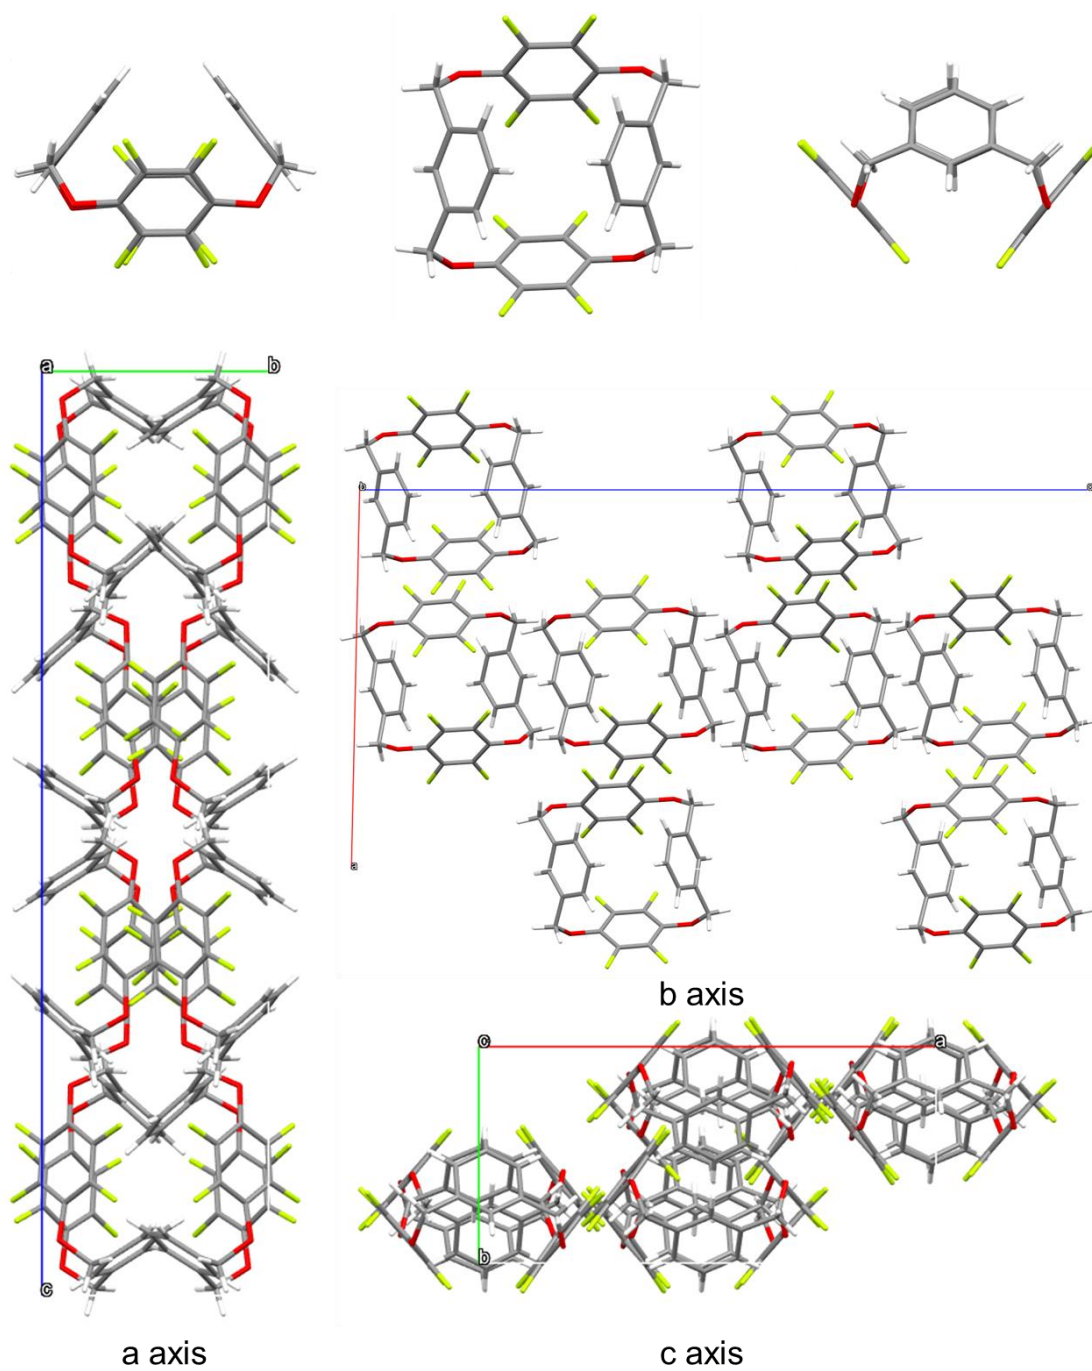

**Figure S1C.** X-Ray molecular structures of **7c** with three different views (top) and packing models of **7c** viewed from three different axes (bottom).

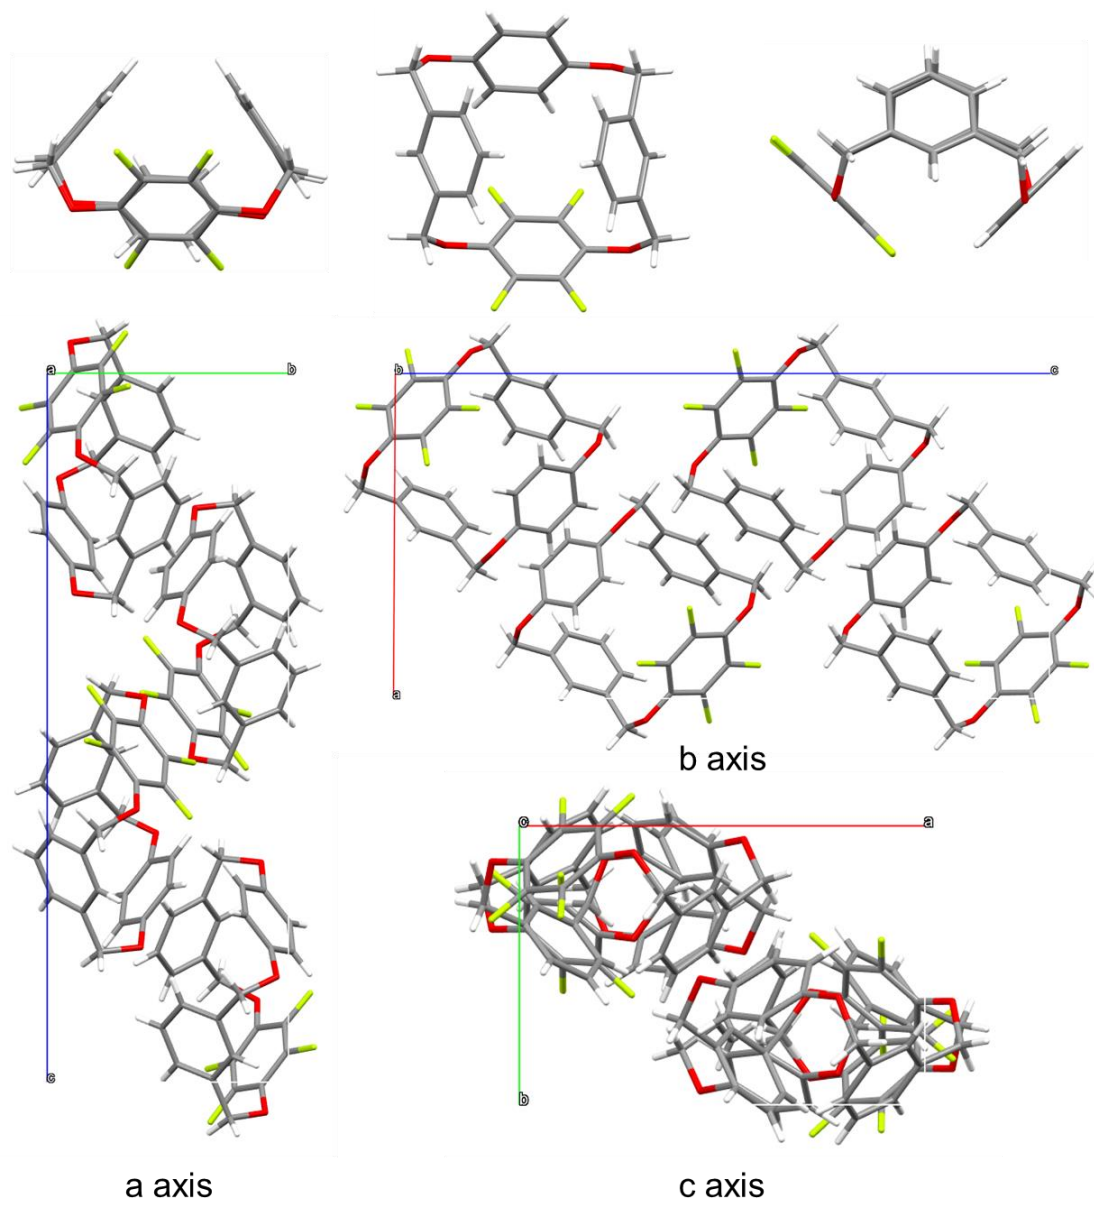

**Figure S1D.** X-Ray molecular structures of **7f** with three different views (top) and packing models of **7f** viewed from three different axes (bottom).



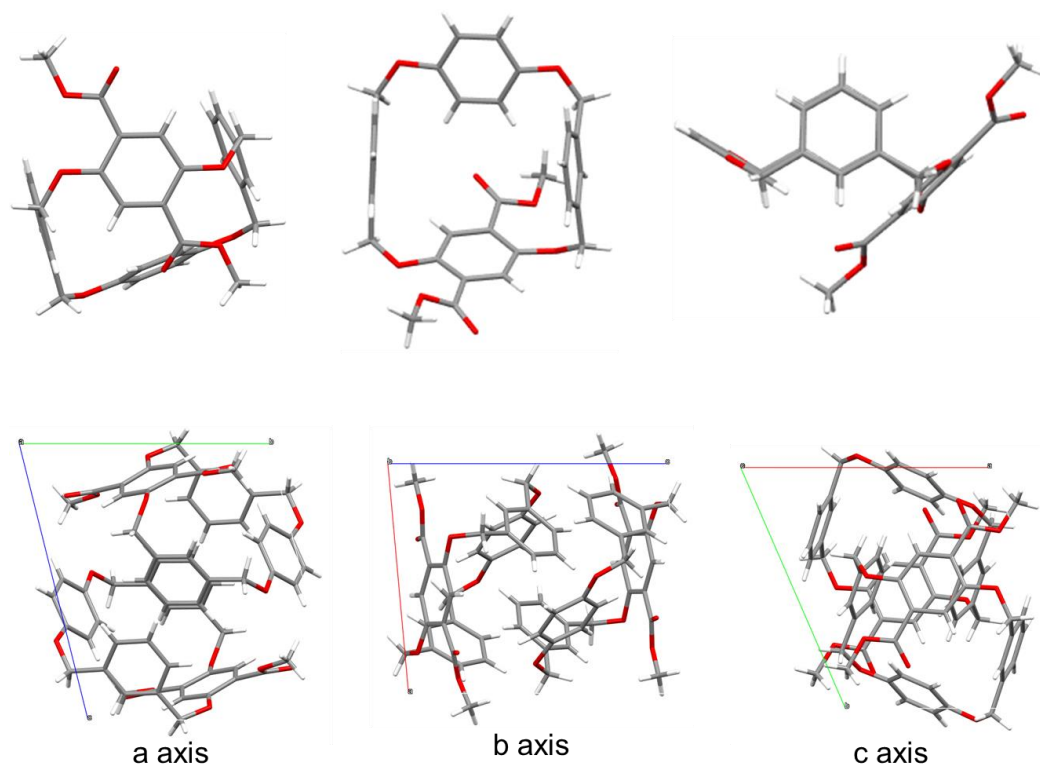

**Figure S1E.** X-Ray molecular structures of **7e** with three different views (top) and packing models of **7e** viewed from three different axes (bottom).

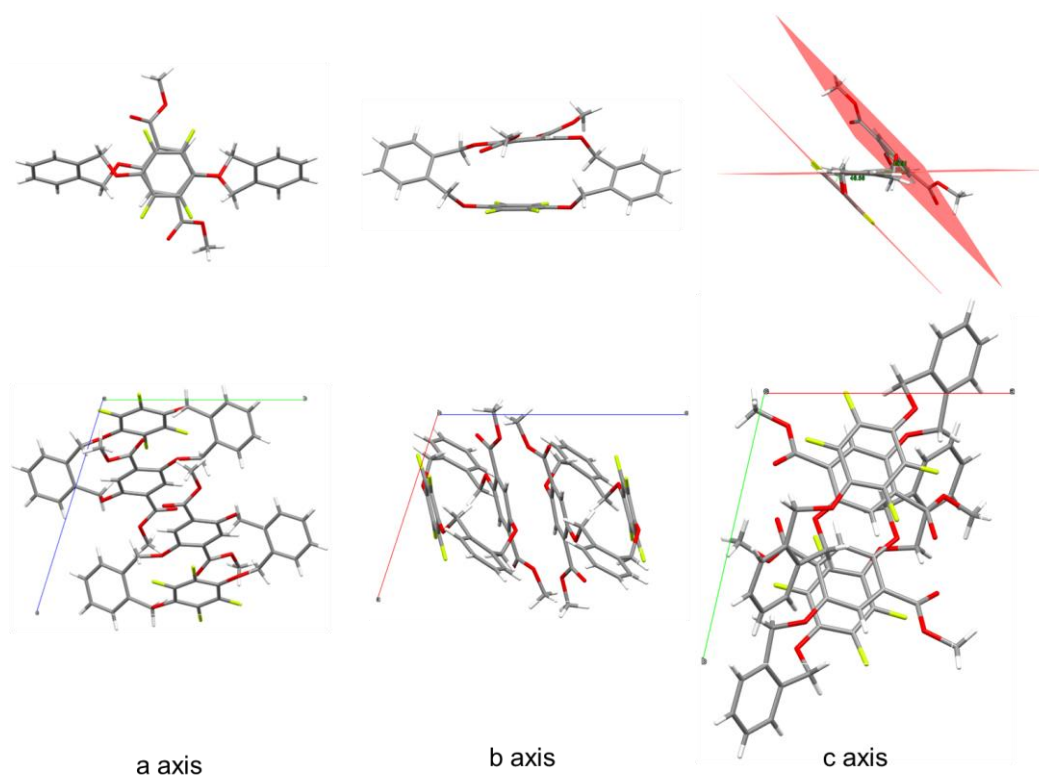

**Figure S2.** X-Ray molecular structures of *race-8* with three different views (top) and packing models of *race-8* viewed from three different axes (bottom).

### 3.2 Molecular structures of spirophanes and bispirophanes

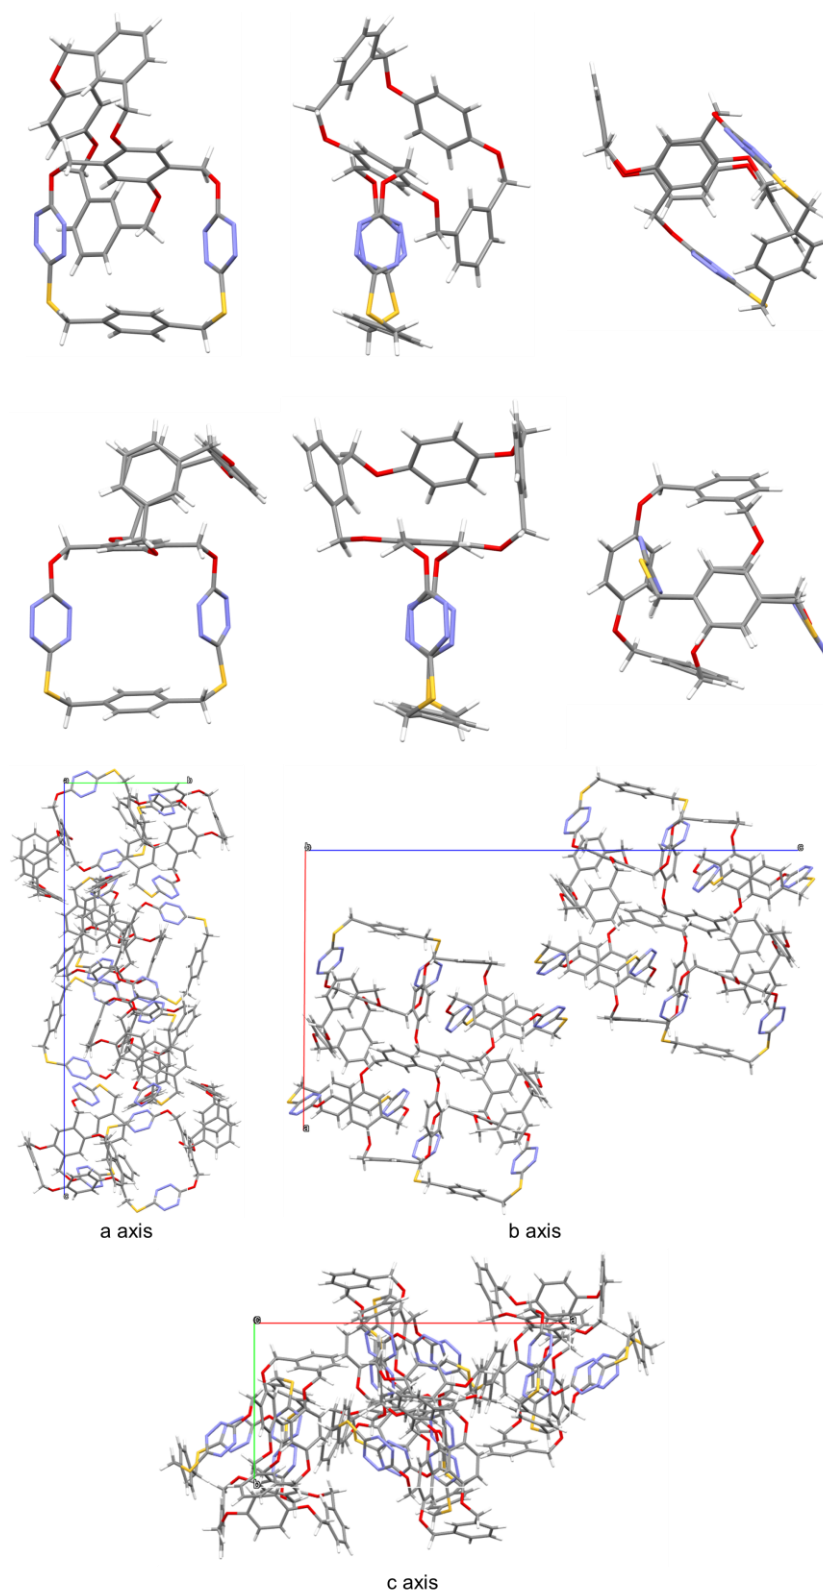

**Figure S3A.** X-Ray molecular structures of *race-15* with two different conformations and three different views (top) and packing models of *race-15* viewed from three different axes (bottom). Solvent molecules are omitted for clarity.

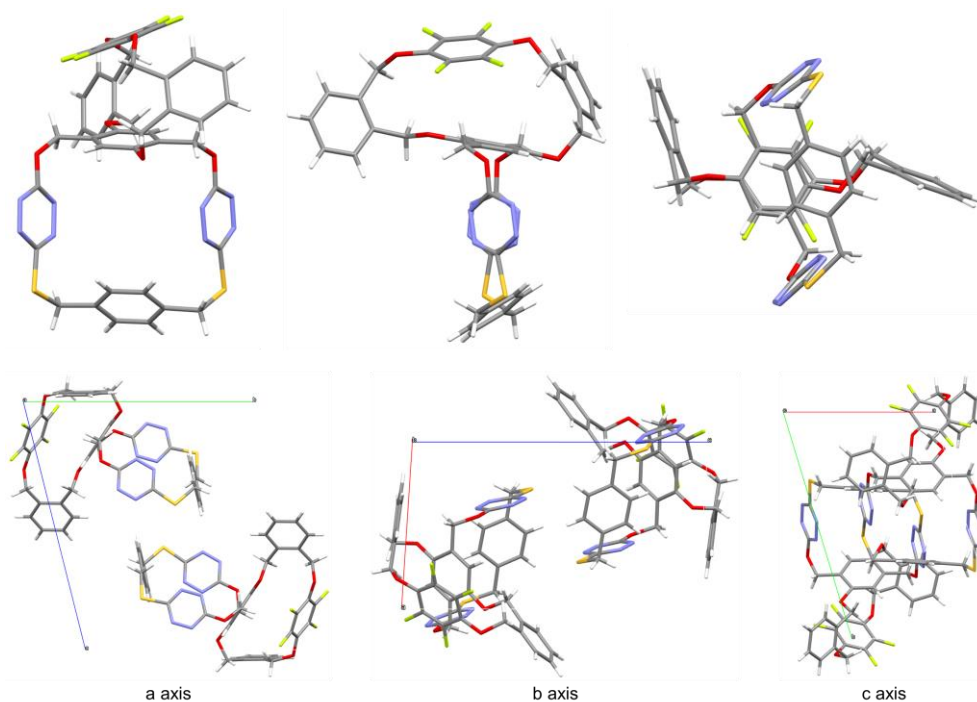

**Figure S3B.** X-Ray molecular structures of *race-16* with three different views (top) and packing models of *race-16* viewed from three different axes (bottom). Solvent molecules are omitted for clarity.

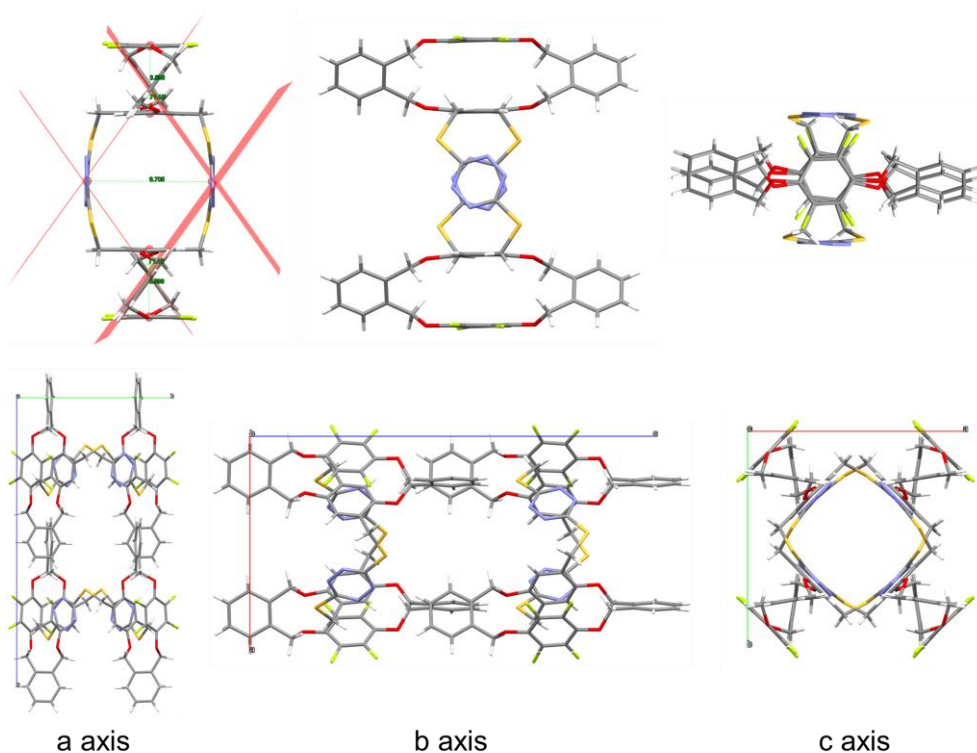

**Figure S4A.** X-Ray molecular structures of *race-25b* with three different views (top) and packing models of *race-25b* viewed from three different axes (bottom). Solvent molecules are omitted for clarity.

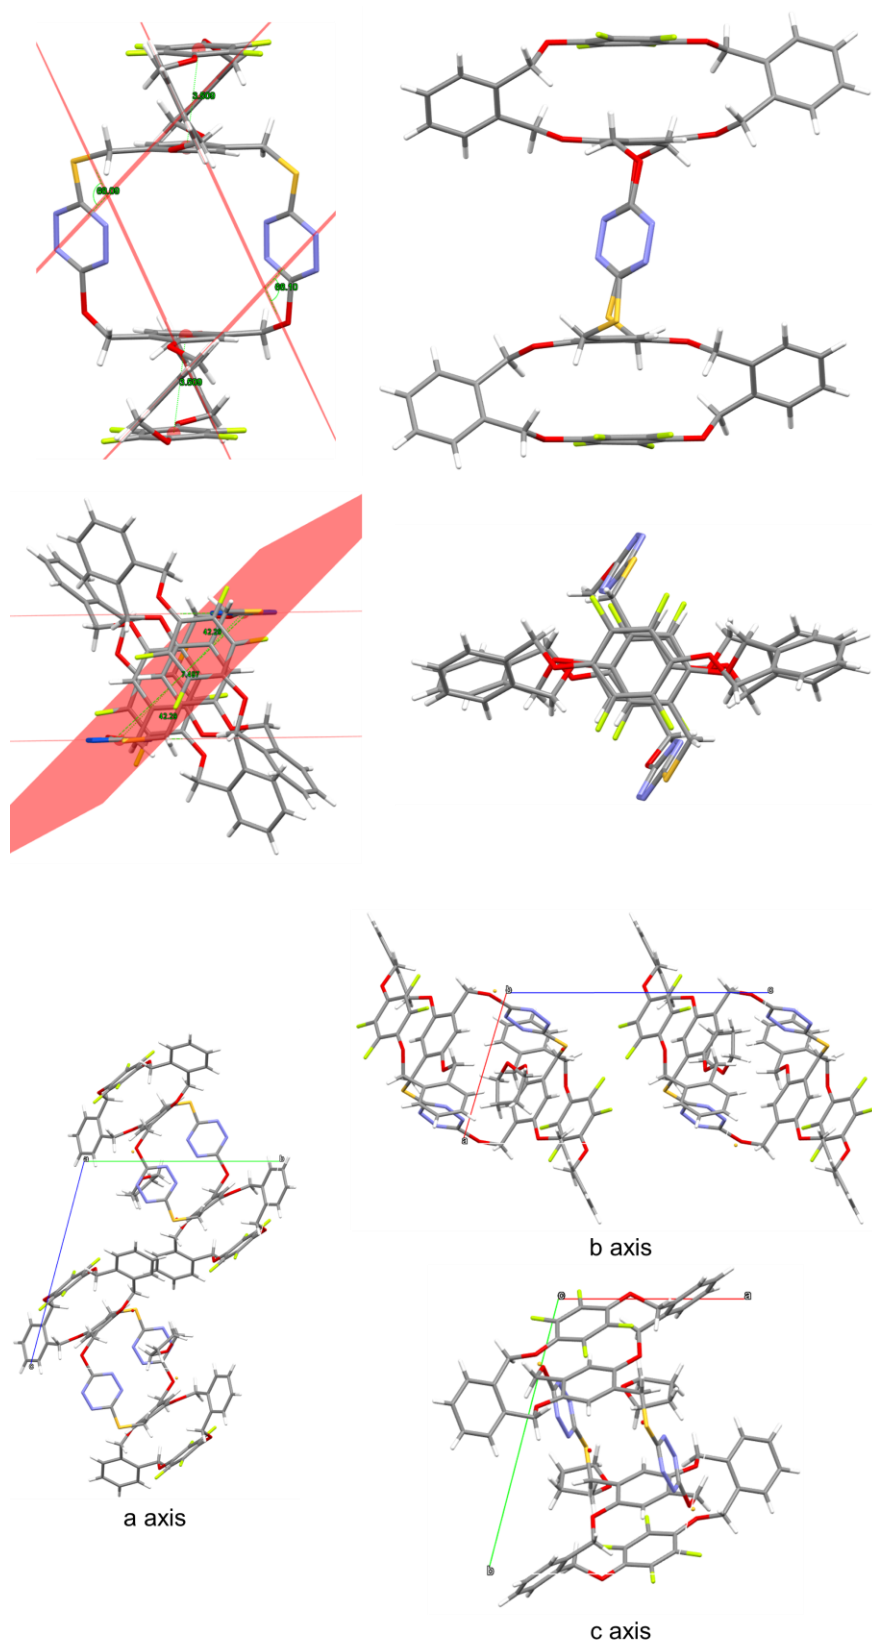

**Figure S4B.** X-Ray molecular structures of *race-26a* with four different views (top) and packing models of *race-26a* viewed from three different axes (bottom). Solvent molecules are omitted for clarity.

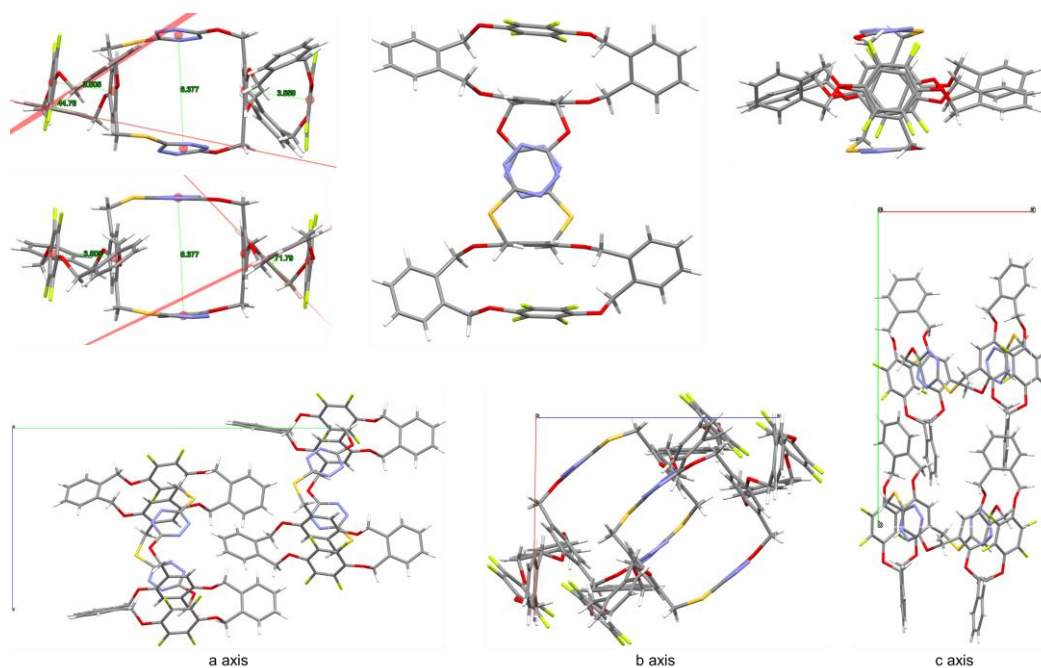

**Figure S4C.** X-Ray molecular structures of *race-26b* with four different views (top) and packing models of *race-26b* viewed from three different axes (bottom). Solvent molecules are omitted for clarity.

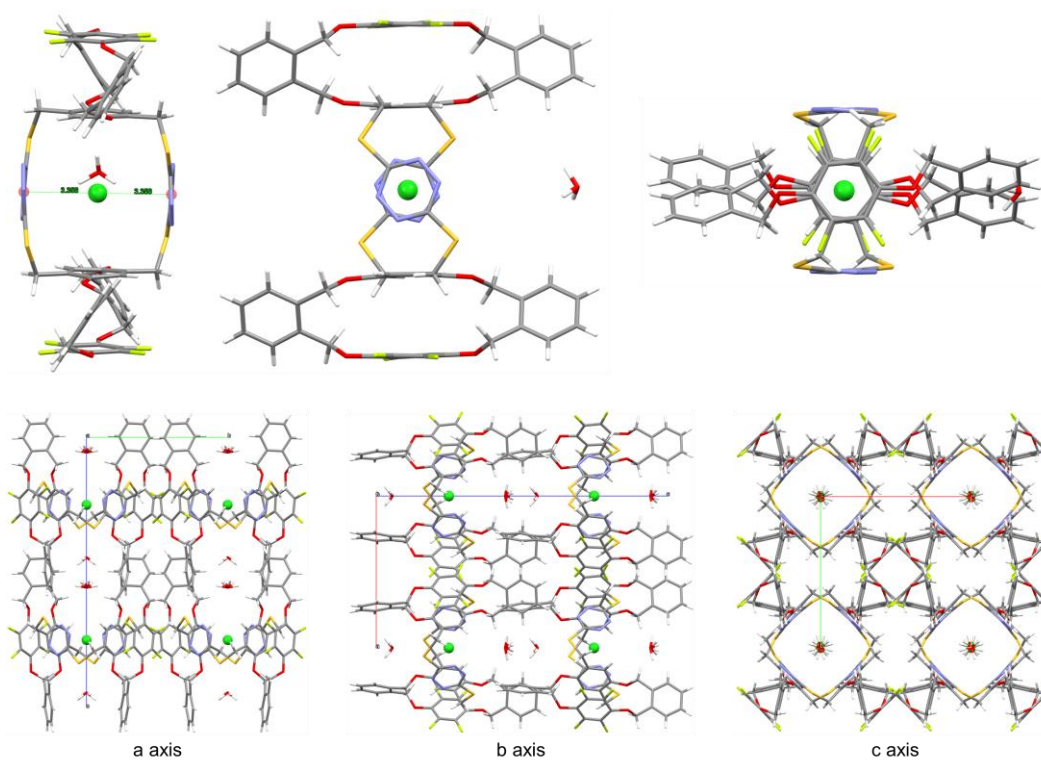

**Figure S5.** X-ray molecular structures of  $[race-25b \cdot H_3OCl]$  with three different views (top) and packing models of  $[race-25b \cdot H_3OCl]$  viewed from three different axes (bottom). Solvent molecules are omitted for clarity.

### 3.3 Molecular structures of complexation of spirophanes and tetrathiafulvalene

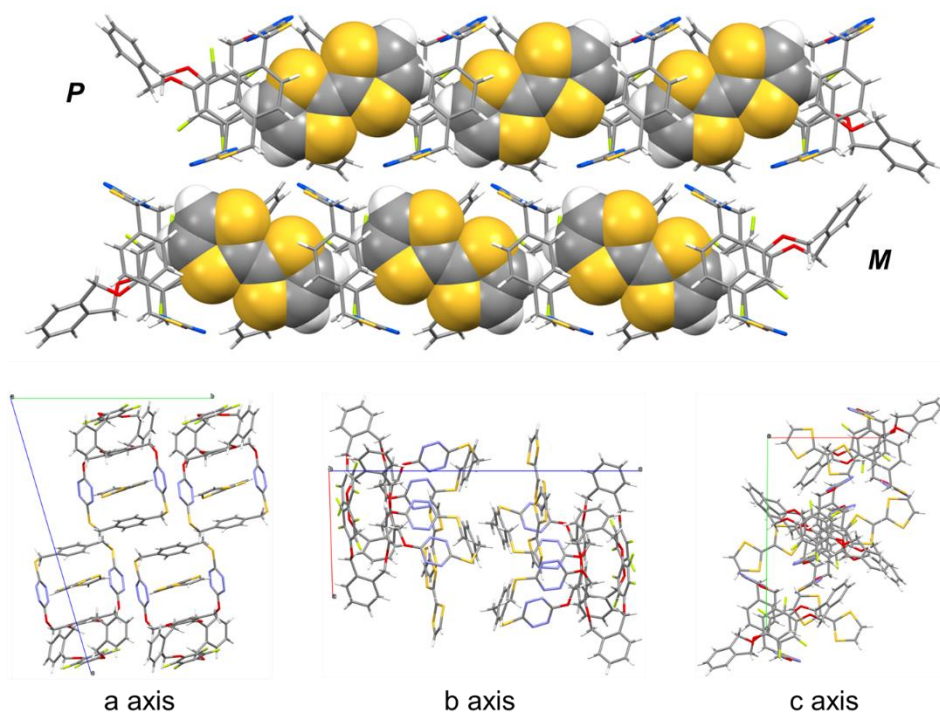

**Figure S6.** X-ray molecular structures of [*race*-16·TTF] (top) and packing models of [*race*-16·TTF] viewed from three different axes (bottom). Solvent molecules are omitted for clarity.

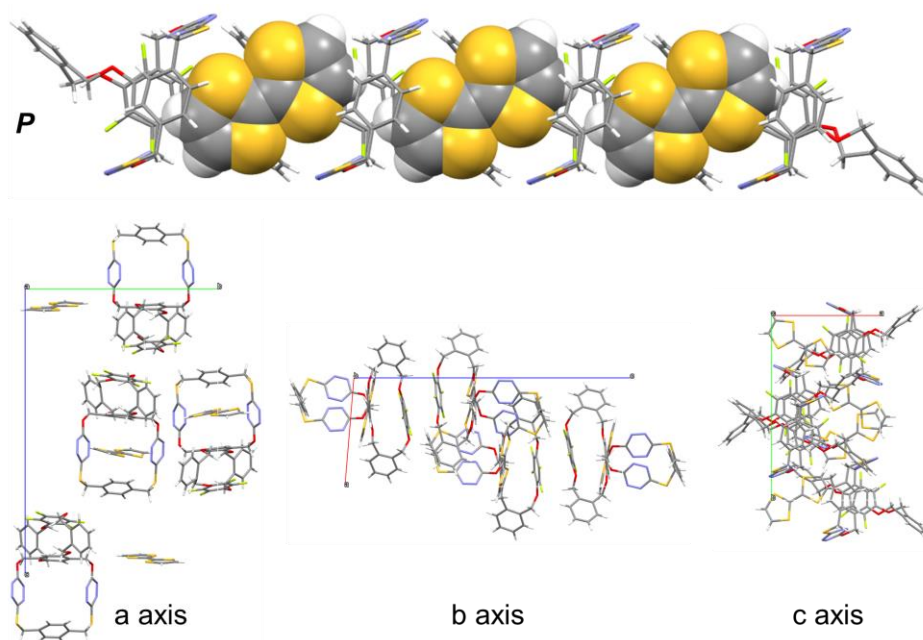

**Figure S7A.** X-ray molecular structures of [*P*-16·TTF] (top) and packing models of [*P*-16·TTF] viewed from three different axes (bottom). Solvent molecules and disordered structures are omitted for clarity.

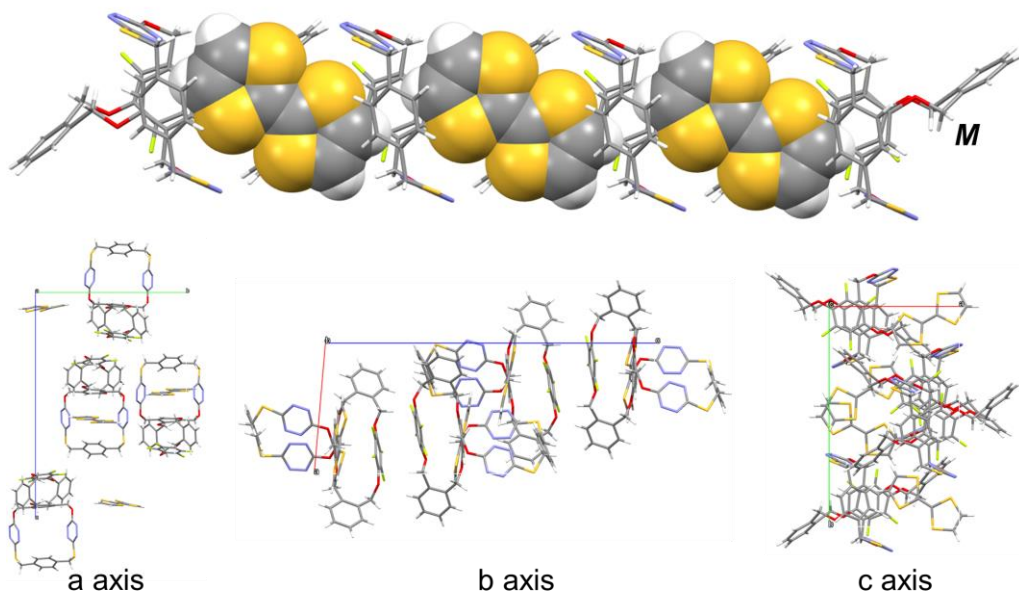

**Figure S7B.** X-ray molecular structures of  $[M-16 \cdot TTF]$  (top) and packing models of  $[P-16 \cdot TTF]$  viewed from three different axes (bottom). Solvent molecules are omitted for clarity.

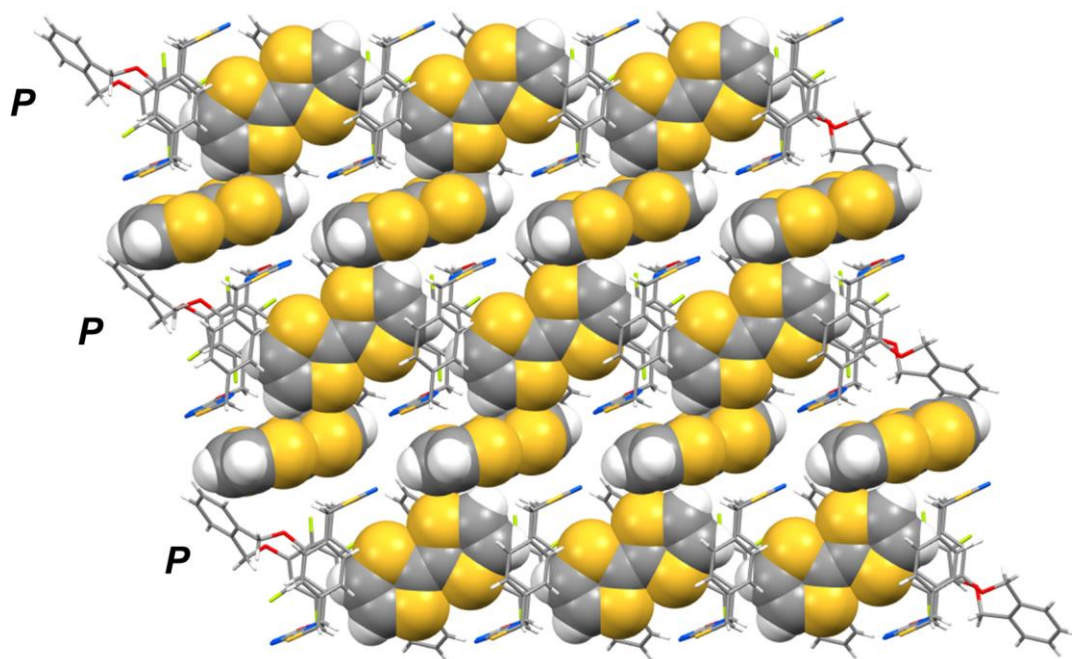

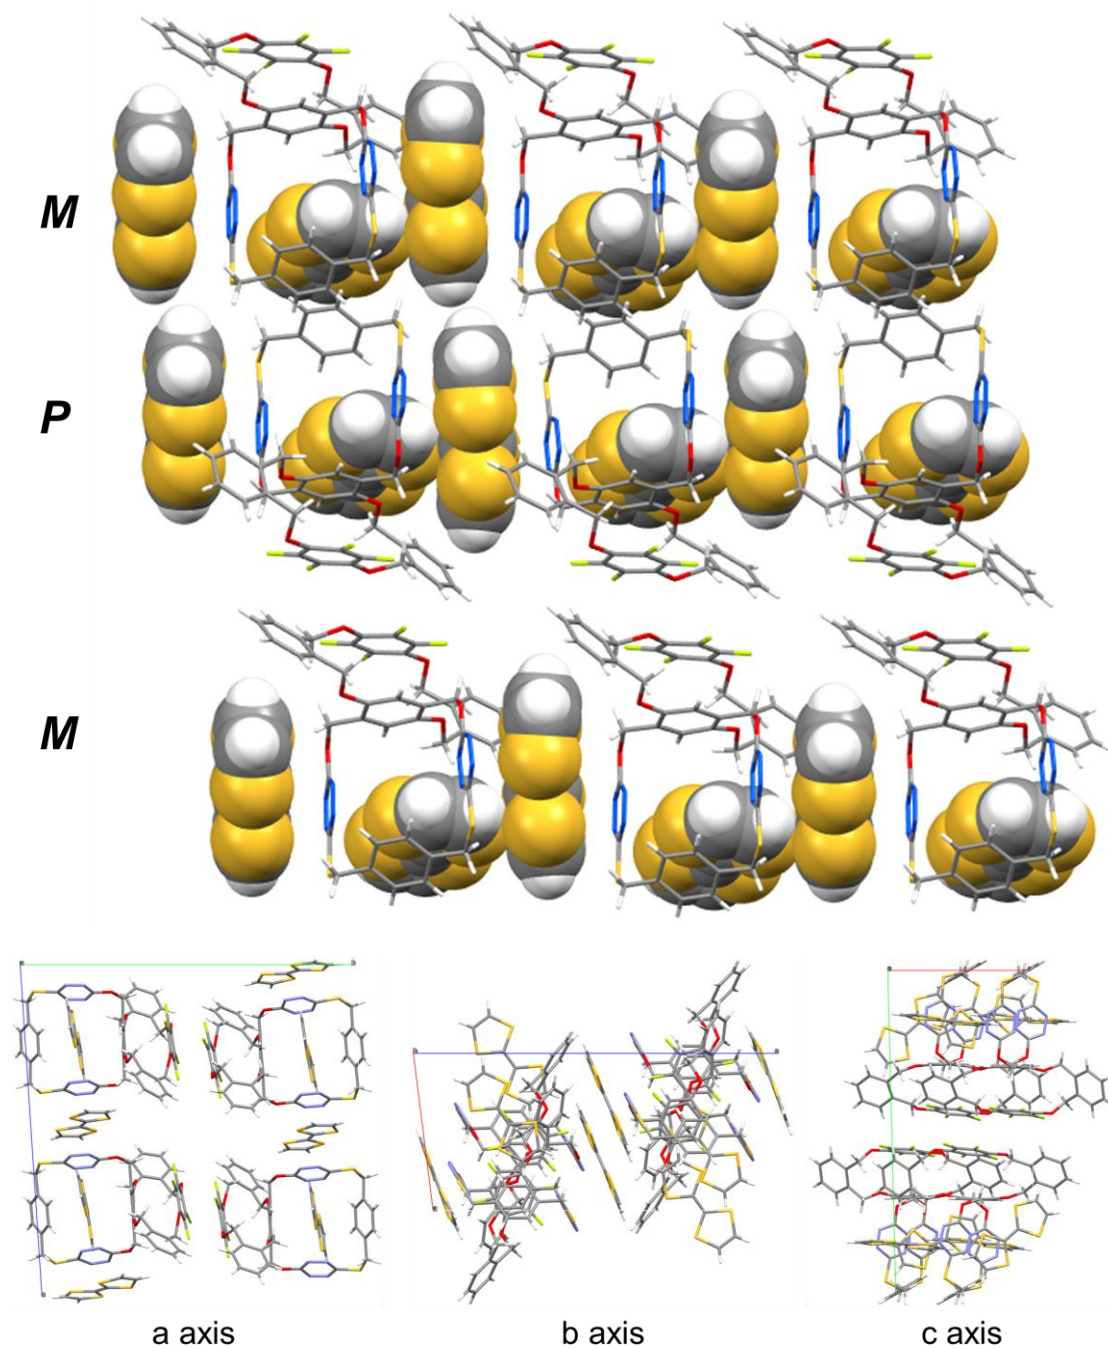

**Figure S8.** X-ray molecular structures of  $[race-16 \cdot 2TTF]$  with two different views and packing models of  $[race-16 \cdot 2TTF]$  viewed from three different axes. Solvent molecules are omitted for clarity.



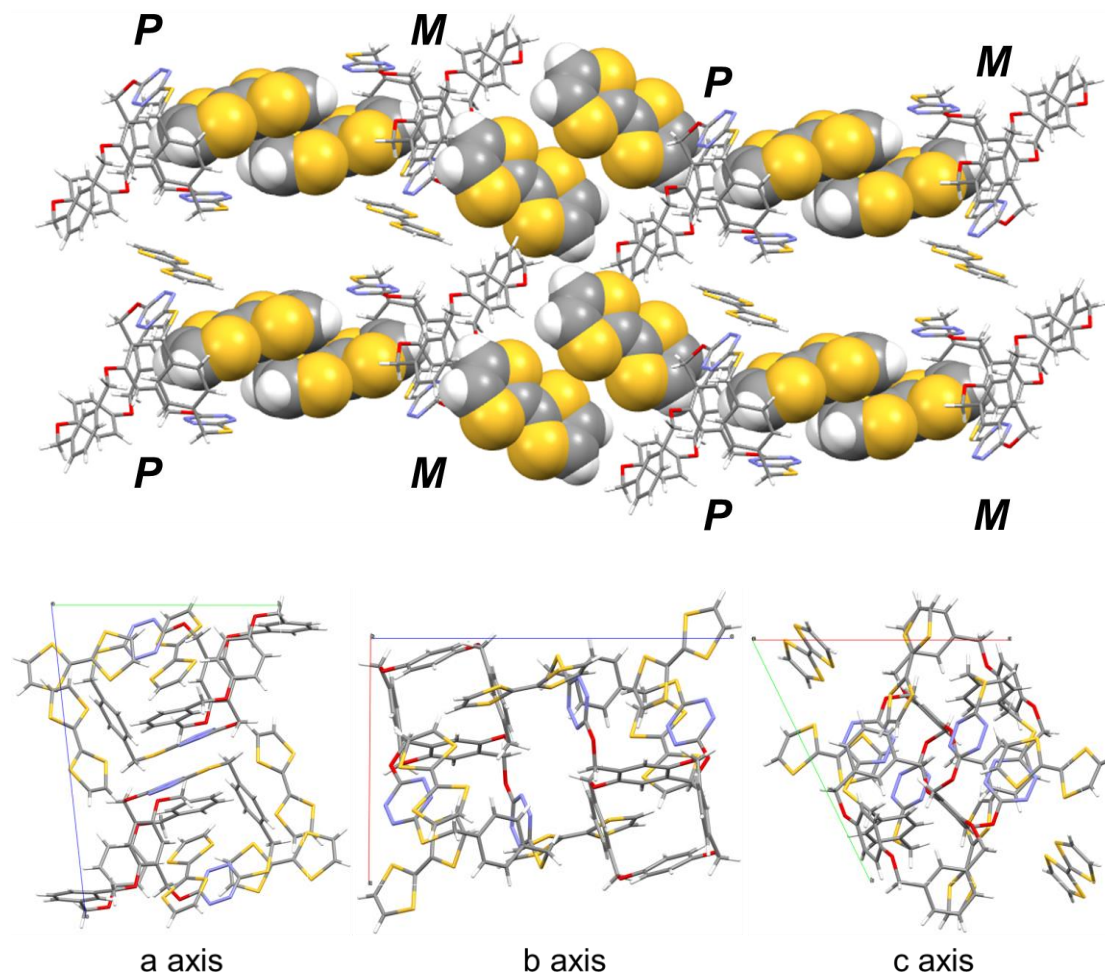

**Figure S9.** X-ray molecular structures of  $[race-15 \cdot 3TTF]$  (top) and packing models of  $[race-15 \cdot 3TTF]$  viewed from three different axes (bottom). Solvent molecules are omitted for clarity.

### 3.4 Molecular structures of enantiopure macrocycles

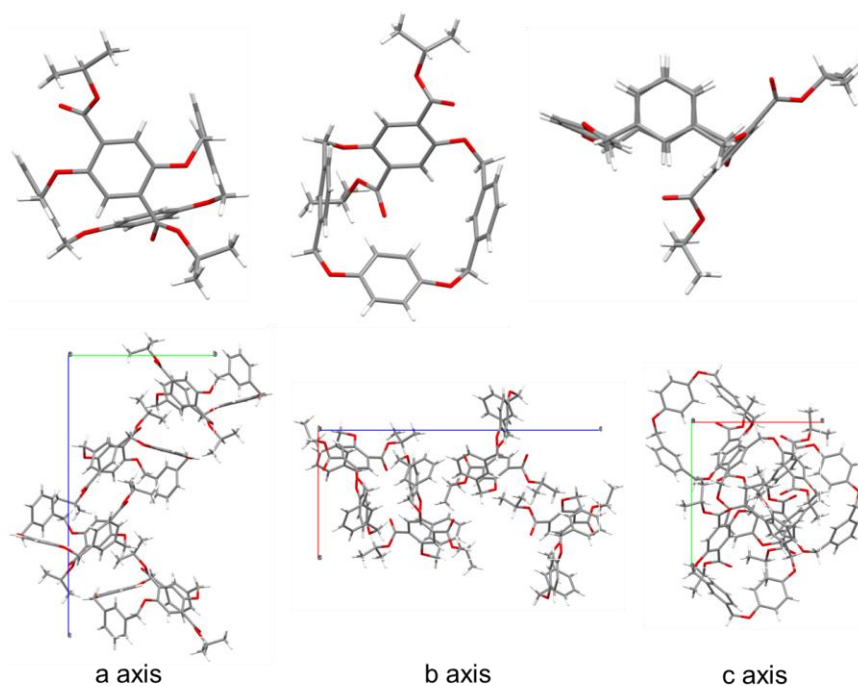

**Figure S10.** X-ray molecular structures of *P-7d* with three different views (top) and packing models of *P-7d* viewed from three different axes (bottom).

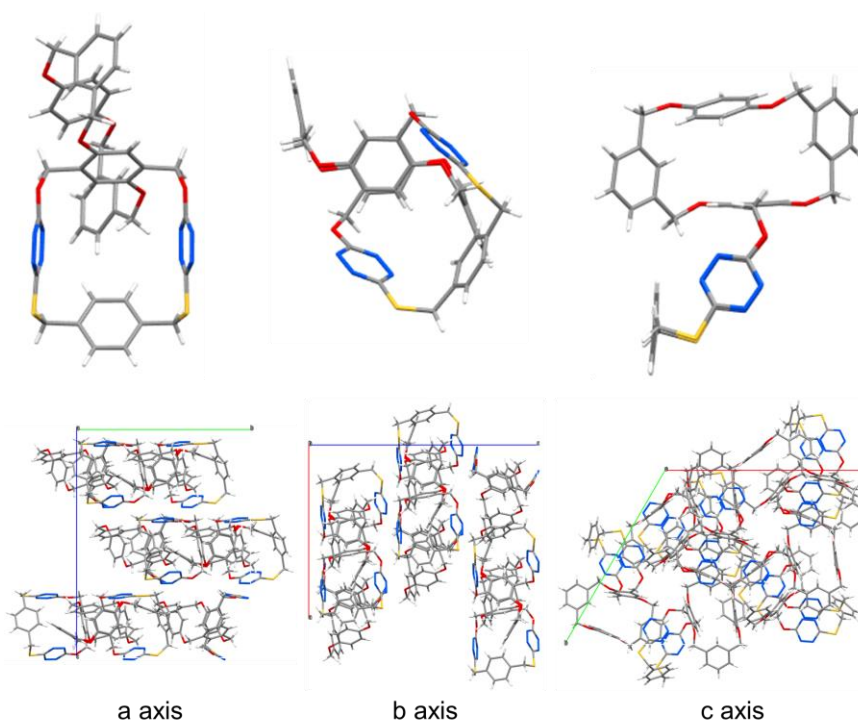

**Figure S11.** X-ray molecular structures of *M-15* with three different views (top) and packing models of *M-15* viewed from three different axes (bottom). Solvent molecules are omitted for clarity.

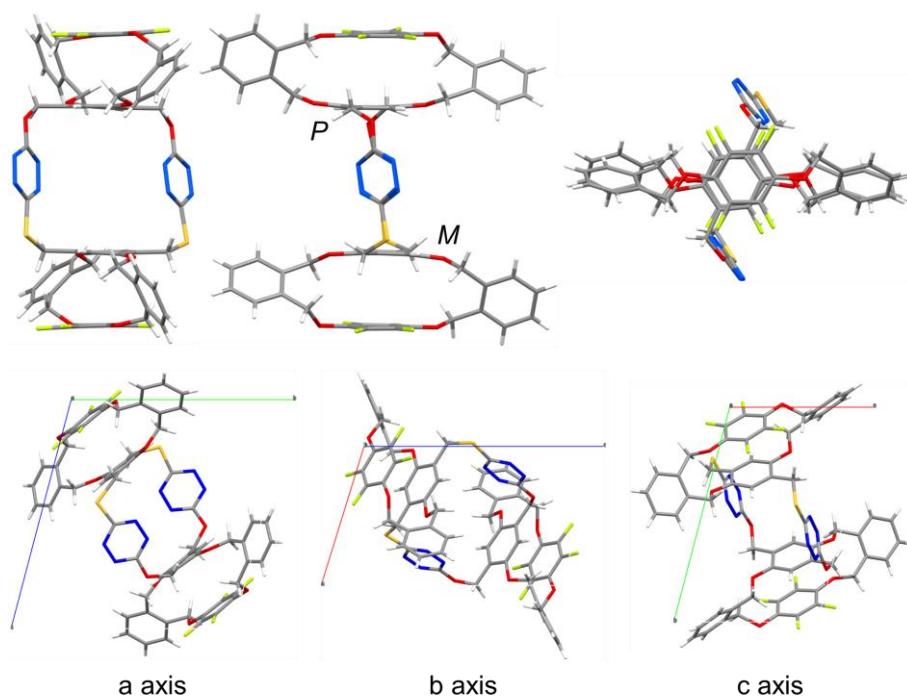

**Figure S12.** X-ray molecular structures of *P,M*-26a with three different views (top) and packing models of *P,M*-26a viewed from three different axes (bottom). Solvent molecules are omitted for clarity.

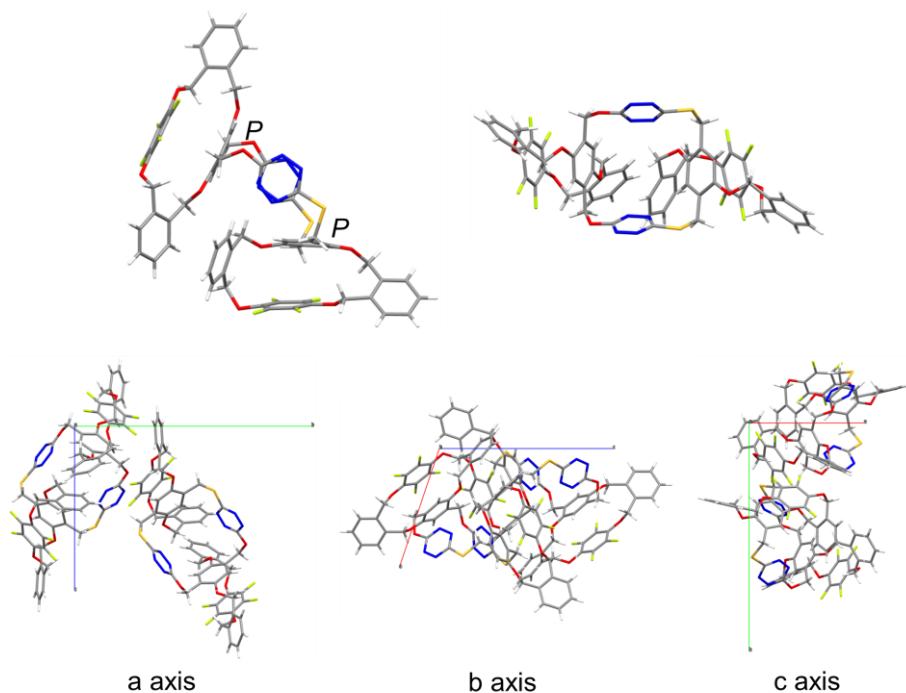

**Figure S13.** X-ray molecular structure of *P,P*-26b with two different views (top) and packing models of *P,P*-26b viewed from three different axes (bottom).

### 3.5 Crystallographic data

**Table S12.** Crystallographic Data

| Identification code                            | (±)-7a                                                               | 7b                                                                  | 7c                                                               | 7e                                                                  |
|------------------------------------------------|----------------------------------------------------------------------|---------------------------------------------------------------------|------------------------------------------------------------------|---------------------------------------------------------------------|
| CCDC No.                                       | 2261277                                                              | 2261278                                                             | 2261279                                                          | 2261280                                                             |
| Empirical formula                              | C <sub>36</sub> H <sub>32</sub> F <sub>4</sub> O <sub>8</sub>        | C <sub>32</sub> H <sub>24</sub> F <sub>4</sub> O <sub>8</sub>       | C <sub>28</sub> H <sub>16</sub> F <sub>8</sub> O <sub>4</sub>    | C <sub>32</sub> H <sub>28</sub> O <sub>8</sub>                      |
| Formula weight                                 | 668.61                                                               | 612.51                                                              | 568.41                                                           | 540.54                                                              |
| Temperature/K                                  | 173.00(10)                                                           | 99.99(10)                                                           | 169.99(11)                                                       | 169.98(11)                                                          |
| Crystal system                                 | orthorhombic                                                         | monoclinic                                                          | monoclinic                                                       | triclinic                                                           |
| Space group                                    | Pna2 <sub>1</sub>                                                    | P2 <sub>1</sub> /n                                                  | I2/a                                                             | P-1                                                                 |
| a/Å                                            | 21.2891(4)                                                           | 10.4892(2)                                                          | 17.2008(2)                                                       | 10.6793(3)                                                          |
| b/Å                                            | 8.10320(10)                                                          | 7.62230(10)                                                         | 8.13200(10)                                                      | 11.6277(2)                                                          |
| c/Å                                            | 36.4586(7)                                                           | 34.5522(6)                                                          | 33.0797(3)                                                       | 12.1410(3)                                                          |
| α/°                                            | 90                                                                   | 90                                                                  | 90                                                               | 72.256(2)                                                           |
| β/°                                            | 90                                                                   | 94.927(2)                                                           | 91.2430(10)                                                      | 77.897(2)                                                           |
| γ/°                                            | 90                                                                   | 90                                                                  | 90                                                               | 64.159(2)                                                           |
| Volume/Å <sup>3</sup>                          | 6289.47(19)                                                          | 2752.30(8)                                                          | 4626.00(9)                                                       | 1287.12(6)                                                          |
| Z                                              | 8                                                                    | 4                                                                   | 8                                                                | 2                                                                   |
| ρ <sub>calc</sub> /cm <sup>3</sup>             | 1.412                                                                | 1.478                                                               | 1.632                                                            | 1.395                                                               |
| μ/mm <sup>-1</sup>                             | 0.977                                                                | 1.063                                                               | 1.336                                                            | 0.828                                                               |
| F(000)                                         | 2784                                                                 | 1264                                                                | 2304                                                             | 568                                                                 |
| Crystal size/mm <sup>3</sup>                   | 0.8 × 0.1 × 0.05                                                     | 0.6 × 0.3 × 0.05                                                    | 0.2 × 0.1 × 0.05                                                 | 0.6 × 0.5 × 0.2                                                     |
| Radiation                                      | Cu Kα (λ =<br>1.54184)                                               | Cu Kα (λ =<br>1.54184)                                              | CuKα (λ = 1.54184)                                               | Cu Kα (λ =<br>1.54184)                                              |
| 2θ range for data<br>collection/°              | 8.306 to 130.21                                                      | 5.134 to 150.84                                                     | 5.344 to 150.754                                                 | 7.676 to 150.664                                                    |
| Index ranges                                   | -24 ≤ h ≤ 25, -9<br>≤ k ≤ 8, -42 ≤ l ≤<br>42                         | -13 ≤ h ≤ 12, -9 ≤<br>k ≤ 3, -42 ≤ l ≤<br>42                        | -18 ≤ h ≤ 21, -9 ≤ k<br>≤ 9, -40 ≤ l ≤ 41                        | -13 ≤ h ≤ 13, -14<br>≤ k ≤ 14, -14 ≤ l<br>≤ 14                      |
| Reflections collected                          | 57052                                                                | 18855                                                               | 16169                                                            | 16920                                                               |
| Independent reflections                        | 10364 [R <sub>int</sub> =<br>0.0664, R <sub>sigma</sub> =<br>0.0412] | 5468 [R <sub>int</sub> =<br>0.0333, R <sub>sigma</sub> =<br>0.0315] | 4549 [R <sub>int</sub> = 0.0204,<br>R <sub>sigma</sub> = 0.0191] | 5085 [R <sub>int</sub> =<br>0.0202, R <sub>sigma</sub> =<br>0.0180] |
| Data/restraints/parameters                     | 10364/73/894                                                         | 5468/0/399                                                          | 4549/0/361                                                       | 5085/0/363                                                          |
| Goodness-of-fit on F <sup>2</sup>              | 1.06                                                                 | 1.023                                                               | 1.049                                                            | 1.054                                                               |
| Final R indexes [I ≥ 2σ<br>(I)]                | R <sub>1</sub> = 0.0731,<br>wR <sub>2</sub> = 0.1888                 | R <sub>1</sub> = 0.0381,<br>wR <sub>2</sub> = 0.0965                | R <sub>1</sub> = 0.0367, wR <sub>2</sub> =<br>0.1005             | R <sub>1</sub> = 0.0488,<br>wR <sub>2</sub> = 0.1345                |
| Final R indexes [all data]                     | R <sub>1</sub> = 0.0780,<br>wR <sub>2</sub> = 0.1945                 | R <sub>1</sub> = 0.0448,<br>wR <sub>2</sub> = 0.1005                | R <sub>1</sub> = 0.0396, wR <sub>2</sub> =<br>0.1025             | R <sub>1</sub> = 0.0524,<br>wR <sub>2</sub> = 0.1373                |
| Largest diff. peak/hole / e<br>Å <sup>-3</sup> | 0.69/-0.33                                                           | 0.18/-0.26                                                          | 0.22/-0.23                                                       | 0.76/-0.25                                                          |

| Identification code                            | 7f                                                                  | (±)-8                                                         | (±)-15·2DCE                                                                                  | (±)-16·2acetone                                                                             |
|------------------------------------------------|---------------------------------------------------------------------|---------------------------------------------------------------|----------------------------------------------------------------------------------------------|---------------------------------------------------------------------------------------------|
| CCDC No.                                       | 2261281                                                             | 2261282                                                       | 2261283                                                                                      | 2261284                                                                                     |
| Empirical formula                              | C <sub>28</sub> H <sub>20</sub> F <sub>4</sub> O <sub>4</sub>       | C <sub>32</sub> H <sub>24</sub> F <sub>4</sub> O <sub>8</sub> | C <sub>44</sub> H <sub>38</sub> Cl <sub>2</sub> N <sub>8</sub> O <sub>6</sub> S <sub>2</sub> | C <sub>48</sub> H <sub>42</sub> F <sub>4</sub> N <sub>8</sub> O <sub>8</sub> S <sub>2</sub> |
| Formula weight                                 | 496.44                                                              | 612.51                                                        | 909.84                                                                                       | 999.01                                                                                      |
| Temperature/K                                  | 169.99(11)                                                          | 172.99(10)                                                    | 105(4)                                                                                       | 137(50)                                                                                     |
| Crystal system                                 | monoclinic                                                          | triclinic                                                     | monoclinic                                                                                   | triclinic                                                                                   |
| Space group                                    | P2 <sub>1</sub> /c                                                  | P-1                                                           | P2 <sub>1</sub> /n                                                                           | P-1                                                                                         |
| a/Å                                            | 11.69180(10)                                                        | 10.04050(10)                                                  | 21.3087(3)                                                                                   | 9.5906(2)                                                                                   |
| b/Å                                            | 8.03030(10)                                                         | 11.2749(2)                                                    | 11.0893(2)                                                                                   | 15.6459(3)                                                                                  |
| c/Å                                            | 23.5644(2)                                                          | 12.9240(2)                                                    | 37.4232(5)                                                                                   | 16.7187(2)                                                                                  |
| α/°                                            | 90                                                                  | 104.2800(10)                                                  | 90                                                                                           | 76.4380(10)                                                                                 |
| β/°                                            | 90.3250(10)                                                         | 105.1950(10)                                                  | 90.3860(10)                                                                                  | 89.655(2)                                                                                   |
| γ/°                                            | 90                                                                  | 98.3680(10)                                                   | 90                                                                                           | 73.552(2)                                                                                   |
| Volume/Å <sup>3</sup>                          | 2212.39(4)                                                          | 1333.29(4)                                                    | 8842.8(2)                                                                                    | 2334.04(8)                                                                                  |
| Z                                              | 4                                                                   | 2                                                             | 8                                                                                            | 2                                                                                           |
| ρ <sub>calc</sub> /g/cm <sup>3</sup>           | 1.49                                                                | 1.526                                                         | 1.367                                                                                        | 1.421                                                                                       |
| μ/mm <sup>-1</sup>                             | 1.037                                                               | 1.098                                                         | 2.679                                                                                        | 1.722                                                                                       |
| F(000)                                         | 1024                                                                | 632                                                           | 3776                                                                                         | 1036                                                                                        |
| Crystal size/mm <sup>3</sup>                   | 0.5 × 0.4 × 0.1                                                     | 0.8 × 0.2 × 0.2                                               | 0.6 × 0.2 × 0.02                                                                             | 0.6 × 0.2 × 0.02                                                                            |
| Radiation                                      | Cu Kα (λ =<br>1.54184)                                              | Cu Kα (λ =<br>1.54184)                                        | Cu Kα (λ =<br>1.54184)                                                                       | Cu Kα (λ =<br>1.54184)                                                                      |
| 2θ range for data<br>collection/°              | 7.504 to 150.622                                                    | 7.426 to 155.582                                              | 8.19 to 134.98                                                                               | 7.108 to 133.372                                                                            |
| Index ranges                                   | -14 ≤ h ≤ 14, -9<br>≤ k ≤ 7, -29 ≤ l ≤<br>28                        | -12 ≤ h ≤ 12, -14<br>≤ k ≤ 14, -12 ≤ l<br>≤ 16                | -25 ≤ h ≤ 25, -12 ≤<br>k ≤ 13, -44 ≤ l ≤ 44                                                  | -11 ≤ h ≤ 10, -18<br>≤ k ≤ 18, -19 ≤ l<br>≤ 19                                              |
| Reflections collected                          | 14843                                                               | 25157                                                         | 101790                                                                                       | 37781                                                                                       |
| Independent reflections                        | 4415 [R <sub>int</sub> =<br>0.0242, R <sub>sigma</sub> =<br>0.0224] | 5461 [R <sub>int</sub> =<br>0.0128]                           | 15613 [R <sub>int</sub> =<br>0.0611]                                                         | 8027 [R <sub>int</sub> =<br>0.1085, R <sub>sigma</sub> =<br>0.0698]                         |
| Data/restraints/parameters                     | 4415/0/325                                                          | 5461/0/399                                                    | 15613/0/1117                                                                                 | 8027/0/635                                                                                  |
| Goodness-of-fit on F <sup>2</sup>              | 1.055                                                               | 1.053                                                         | 1.04                                                                                         | 1.015                                                                                       |
| Final R indexes [I ≥ 2σ<br>(I)]                | R <sub>1</sub> = 0.0361,<br>wR <sub>2</sub> = 0.0956                | R <sub>1</sub> = 0.0384,<br>wR <sub>2</sub> = 0.1025          | R <sub>1</sub> = 0.0769, wR <sub>2</sub> =<br>0.2023                                         | R <sub>1</sub> = 0.0628,<br>wR <sub>2</sub> = 0.1594                                        |
| Final R indexes [all data]                     | R <sub>1</sub> = 0.0397,<br>wR <sub>2</sub> = 0.0982                | R <sub>1</sub> = 0.0396,<br>wR <sub>2</sub> = 0.1035          | R <sub>1</sub> = 0.0874, wR <sub>2</sub> =<br>0.2115                                         | R <sub>1</sub> = 0.0709,<br>wR <sub>2</sub> = 0.1658                                        |
| Largest diff. peak/hole / e<br>Å <sup>-3</sup> | 0.20/-0.23                                                          | 0.31/-0.21                                                    | 1.24/-0.51                                                                                   | 0.59/-0.72                                                                                  |

| Identification code                            | (±)- <b>25b</b> ·Toluene                                                                    | (±)- <b>26a</b> ·THF                                                                         | (±)- <b>26b</b> ·3CH <sub>3</sub> CN·<br>CH <sub>3</sub> OH                                       | <i>P-7d</i>                                                         |
|------------------------------------------------|---------------------------------------------------------------------------------------------|----------------------------------------------------------------------------------------------|---------------------------------------------------------------------------------------------------|---------------------------------------------------------------------|
| CCDC No.                                       | 2261285                                                                                     | 2261286                                                                                      | 2261287                                                                                           | 2261291                                                             |
| Empirical formula                              | C <sub>78</sub> H <sub>60</sub> F <sub>8</sub> N <sub>8</sub> O <sub>8</sub> S <sub>4</sub> | C <sub>72</sub> H <sub>60</sub> F <sub>8</sub> N <sub>8</sub> O <sub>12</sub> S <sub>2</sub> | C <sub>70</sub> H <sub>55.5</sub> F <sub>8</sub> N <sub>10.5</sub> O <sub>11</sub> S <sub>2</sub> | C <sub>36</sub> H <sub>36</sub> O <sub>8</sub>                      |
| Formula weight                                 | 1517.58                                                                                     | 1445.4                                                                                       | 1435.87                                                                                           | 596.65                                                              |
| Temperature/K                                  | 225(40)                                                                                     | 172.98(17)                                                                                   | 173(2)                                                                                            | 112(8)                                                              |
| Crystal system                                 | tetragonal                                                                                  | triclinic                                                                                    | monoclinic                                                                                        | orthorhombic                                                        |
| Space group                                    | P-4c2                                                                                       | P-1                                                                                          | P2 <sub>1</sub>                                                                                   | P2 <sub>1</sub> 2 <sub>1</sub> 2 <sub>1</sub>                       |
| a/Å                                            | 12.7227(4)                                                                                  | 8.8879(2)                                                                                    | 11.22933(19)                                                                                      | 10.6803(7)                                                          |
| b/Å                                            | 12.7227(4)                                                                                  | 13.4255(5)                                                                                   | 23.1073(6)                                                                                        | 12.0458(8)                                                          |
| c/Å                                            | 23.8456(5)                                                                                  | 14.8388(4)                                                                                   | 13.31714(19)                                                                                      | 23.3062(19)                                                         |
| α/°                                            | 90                                                                                          | 101.412(3)                                                                                   | 90                                                                                                | 90                                                                  |
| β/°                                            | 90                                                                                          | 103.513(2)                                                                                   | 90.7038(14)                                                                                       | 90                                                                  |
| γ/°                                            | 90                                                                                          | 101.034(3)                                                                                   | 90                                                                                                | 90                                                                  |
| Volume/Å <sup>3</sup>                          | 3859.8(3)                                                                                   | 1634.29(9)                                                                                   | 3455.26(11)                                                                                       | 2998.4(4)                                                           |
| Z                                              | 2                                                                                           | 1                                                                                            | 2                                                                                                 | 4                                                                   |
| ρ <sub>calc</sub> /g/cm <sup>3</sup>           | 1.306                                                                                       | 1.469                                                                                        | 1.38                                                                                              | 1.322                                                               |
| μ/mm <sup>-1</sup>                             | 1.8                                                                                         | 1.558                                                                                        | 1.471                                                                                             | 0.759                                                               |
| F(000)                                         | 1568                                                                                        | 748                                                                                          | 1482                                                                                              | 1264                                                                |
| Crystal size/mm <sup>3</sup>                   | 0.8 × 0.02 × 0.02                                                                           | 0.1 × 0.05 × 0.05                                                                            | 0.6 × 0.5 × 0.1                                                                                   | 0.2 × 0.2 × 0.2                                                     |
| Radiation                                      | Cu Kα (λ =<br>1.54184)                                                                      | Cu Kα (λ =<br>1.54184)                                                                       | Cu Kα (λ =<br>1.54184)                                                                            | Cu Kα (λ =<br>1.54184)                                              |
| 2θ range for data<br>collection/°              | 6.948 to 154.624                                                                            | 6.334 to 156.648                                                                             | 6.638 to 154.986                                                                                  | 8.262 to 156                                                        |
| Index ranges                                   | -12 ≤ h ≤ 14, -15<br>≤ k ≤ 16, -12 ≤ l<br>≤ 29                                              | -11 ≤ h ≤ 11, -16<br>≤ k ≤ 16, -18 ≤ l<br>≤ 14                                               | -14 ≤ h ≤ 14, -28 ≤<br>k ≤ 27, -15 ≤ l ≤ 16                                                       | -11 ≤ h ≤ 13, -15<br>≤ k ≤ 13, -29 ≤ l<br>≤ 29                      |
| Reflections collected                          | 11709                                                                                       | 29356                                                                                        | 34533                                                                                             | 25654                                                               |
| Independent reflections                        | 3719 [R <sub>int</sub> =<br>0.0391, R <sub>sigma</sub> =<br>0.0440]                         | 6698 [R <sub>int</sub> =<br>0.0892, R <sub>sigma</sub> =<br>0.0660]                          | 11655 [R <sub>int</sub> =<br>0.0449, R <sub>sigma</sub> =<br>0.0338]                              | 6203 [R <sub>int</sub> =<br>0.0302, R <sub>sigma</sub> =<br>0.0203] |
| Data/restraints/parameters                     | 3719/3/241                                                                                  | 6698/90/460                                                                                  | 11655/174/861                                                                                     | 6203/0/402                                                          |
| Goodness-of-fit on F <sup>2</sup>              | 1.023                                                                                       | 1.103                                                                                        | 1.082                                                                                             | 1.09                                                                |
| Final R indexes [I] ≥ 2σ<br>(I)]               | R <sub>1</sub> = 0.0410,<br>wR <sub>2</sub> = 0.1020                                        | R <sub>1</sub> = 0.1171,<br>wR <sub>2</sub> = 0.2816                                         | R <sub>1</sub> = 0.0962, wR <sub>2</sub> =<br>0.2736                                              | R <sub>1</sub> = 0.0316,<br>wR <sub>2</sub> = 0.0829                |
| Final R indexes [all data]                     | R <sub>1</sub> = 0.0649,<br>wR <sub>2</sub> = 0.1151                                        | R <sub>1</sub> = 0.1457,<br>wR <sub>2</sub> = 0.2904                                         | R <sub>1</sub> = 0.1012, wR <sub>2</sub> =<br>0.2803                                              | R <sub>1</sub> = 0.0320,<br>wR <sub>2</sub> = 0.0832                |
| Largest diff. peak/hole / e<br>Å <sup>-3</sup> | 0.17/-0.14                                                                                  | 0.53/-0.41                                                                                   | 1.37/-0.62                                                                                        | 0.18/-0.20                                                          |
| Flack parameter                                |                                                                                             |                                                                                              |                                                                                                   | 0.02(5)                                                             |

| Identification code                            | <i>M-15</i> ·5/3CHCl <sub>3</sub>                                                   | <i>P,M-26a</i> ·2THF                                                              | <i>P,P-26b</i>                                                                  | (±)- <b>25b</b> ·H <sub>3</sub> OCl·<br>2DCE·H <sub>2</sub> O                                   |
|------------------------------------------------|-------------------------------------------------------------------------------------|-----------------------------------------------------------------------------------|---------------------------------------------------------------------------------|-------------------------------------------------------------------------------------------------|
| CCDC No.                                       | 2261299                                                                             | 2261294                                                                           | 2261295                                                                         | 2261288                                                                                         |
| Empirical formula                              | C <sub>43.67</sub> H <sub>35.67</sub> Cl <sub>5</sub> N <sub>8</sub> O <sub>6</sub> | C <sub>70</sub> H <sub>56</sub> F <sub>8</sub> N <sub>8</sub> O <sub>11.5</sub> S | C <sub>64</sub> H <sub>44</sub> F <sub>8</sub> N <sub>8</sub> O <sub>10</sub> S | C <sub>68</sub> H <sub>57</sub> Cl <sub>5</sub> F <sub>8</sub> N <sub>8</sub> O <sub>10</sub> S |
|                                                | S <sub>2</sub>                                                                      | 2                                                                                 | 2                                                                               | 4                                                                                               |
| Formula weight                                 | 1009.84                                                                             | 1409.34                                                                           | 1301.19                                                                         | 1603.7                                                                                          |
| Temperature/K                                  | 172.99(10)                                                                          | 173.00(10)                                                                        | 172.99(10)                                                                      | 174(3)                                                                                          |
| Crystal system                                 | trigonal                                                                            | triclinic                                                                         | monoclinic                                                                      | tetragonal                                                                                      |
| Space group                                    | R3                                                                                  | P1                                                                                | P2 <sub>1</sub>                                                                 | P-4c2                                                                                           |
| a/Å                                            | 21.6918(2)                                                                          | 8.9270(2)                                                                         | 10.48012(13)                                                                    | 12.4912(3)                                                                                      |
| b/Å                                            | 21.6918(2)                                                                          | 13.6209(3)                                                                        | 19.7332(2)                                                                      | 12.4912(3)                                                                                      |
| c/Å                                            | 24.6601(2)                                                                          | 14.7225(3)                                                                        | 14.4640(2)                                                                      | 23.9051(7)                                                                                      |
| α/°                                            | 90                                                                                  | 101.208(2)                                                                        | 90                                                                              | 90                                                                                              |
| β/°                                            | 90                                                                                  | 104.314(2)                                                                        | 108.5819(15)                                                                    | 90                                                                                              |
| γ/°                                            | 120                                                                                 | 101.040(2)                                                                        | 90                                                                              | 90                                                                                              |
| Volume/Å <sup>3</sup>                          | 10048.9(2)                                                                          | 1646.58(7)                                                                        | 2835.32(7)                                                                      | 3729.9(2)                                                                                       |
| Z                                              | 9                                                                                   | 1                                                                                 | 2                                                                               | 2                                                                                               |
| ρ <sub>calc</sub> /cm <sup>3</sup>             | 1.502                                                                               | 1.421                                                                             | 1.524                                                                           | 1.428                                                                                           |
| μ/mm <sup>-1</sup>                             | 4.326                                                                               | 1.526                                                                             | 1.702                                                                           | 3.52                                                                                            |
| F(000)                                         | 4668                                                                                | 728                                                                               | 1336                                                                            | 1644                                                                                            |
| Crystal size/mm <sup>3</sup>                   | 0.6 × 0.5 × 0.3                                                                     | 0.5 × 0.3 × 0.3                                                                   | 0.2 × 0.2 × 0.02                                                                | 0.2 × 0.05 × 0.05                                                                               |
| Radiation                                      | Cu Kα (λ =<br>1.54184)                                                              | Cu Kα (λ =<br>1.54184)                                                            | Cu Kα (λ =<br>1.54184)                                                          | Cu Kα (λ =<br>1.54184)                                                                          |
| 2θ range for data<br>collection/°              | 5.914 to 157.244                                                                    | 6.406 to 154.804                                                                  | 6.446 to 156.27                                                                 | 7.396 to 154.822                                                                                |
| Index ranges                                   | -21 ≤ h ≤ 27, -27 ≤ k<br>≤ 24, -31 ≤ l ≤ 31                                         | -11 ≤ h ≤ 11, -17<br>≤ k ≤ 17, -18 ≤ l<br>≤ 18                                    | -12 ≤ h ≤ 13, -<br>24 ≤ k ≤ 24, -18<br>≤ l ≤ 18                                 | -15 ≤ h ≤ 15, -13 ≤<br>k ≤ 15, -29 ≤ l ≤ 30                                                     |
| Reflections collected                          | 64749                                                                               | 58642                                                                             | 53870                                                                           | 17203                                                                                           |
| Independent reflections                        | 9218 [R <sub>int</sub> = 0.0527,<br>R <sub>sigma</sub> = 0.0207]                    | 12534 [R <sub>int</sub> =<br>0.0777, R <sub>sigma</sub> =<br>0.0398]              | 11743 [R <sub>int</sub> =<br>0.0402, R <sub>sigma</sub> =<br>0.0257]            | 3794 [R <sub>int</sub> =<br>0.1085, R <sub>sigma</sub> =<br>0.0591]                             |
| Data/restraints/parameters                     | 9218/1/583                                                                          | 12534/3/919                                                                       | 11743/43/829                                                                    | 3794/39/237                                                                                     |
| Goodness-of-fit on F <sup>2</sup>              | 1.041                                                                               | 0.909                                                                             | 1.03                                                                            | 1.001                                                                                           |
| Final R indexes [I >= 2σ<br>(I)]               | R <sub>1</sub> = 0.0554, wR <sub>2</sub> =<br>0.1649                                | R <sub>1</sub> = 0.0570,<br>wR <sub>2</sub> = 0.1691                              | R <sub>1</sub> = 0.0413,<br>wR <sub>2</sub> = 0.1091                            | R <sub>1</sub> = 0.0922, wR <sub>2</sub> =<br>0.2541                                            |
| Final R indexes [all<br>data]                  | R <sub>1</sub> = 0.0559, wR <sub>2</sub> =<br>0.1658                                | R <sub>1</sub> = 0.0592,<br>wR <sub>2</sub> = 0.1726                              | R <sub>1</sub> = 0.0453,<br>wR <sub>2</sub> = 0.1121                            | R <sub>1</sub> = 0.1088, wR <sub>2</sub> =<br>0.2765                                            |
| Largest diff. peak/hole /<br>e Å <sup>-3</sup> | 0.92/-1.00                                                                          | 0.86/-0.43                                                                        | 0.62/-0.30                                                                      | 1.09/-0.38                                                                                      |
| Flack parameter                                | 0.015(4)                                                                            | 0.043(8)                                                                          | 0.011(10)                                                                       | -                                                                                               |

| Identification code                         | (±)-15·3TTF·<br>0.5DCE                                                                          | (±)-16·TTF·<br>0.5dioxane                                                                   | (±)-16·2TTF·<br>CHCl <sub>3</sub>                                                                            |
|---------------------------------------------|-------------------------------------------------------------------------------------------------|---------------------------------------------------------------------------------------------|--------------------------------------------------------------------------------------------------------------|
| CCDC No.                                    | 2261289                                                                                         | 2261298                                                                                     | 2261290                                                                                                      |
| Empirical formula                           | C <sub>61</sub> H <sub>48</sub> Cl <sub>0.5</sub> N <sub>8</sub> O <sub>6</sub> S <sub>14</sub> | C <sub>50</sub> H <sub>38</sub> F <sub>4</sub> N <sub>8</sub> O <sub>7</sub> S <sub>6</sub> | C <sub>55</sub> H <sub>39</sub> Cl <sub>3</sub> F <sub>4</sub> N <sub>8</sub> O <sub>6</sub> S <sub>10</sub> |
| Formula weight                              | 1455.64                                                                                         | 1131.24                                                                                     | 1410.89                                                                                                      |
| Temperature/K                               | 99.98(10)                                                                                       | 100.00(10)                                                                                  | 100.00(10)                                                                                                   |
| Crystal system                              | triclinic                                                                                       | triclinic                                                                                   | triclinic                                                                                                    |
| Space group                                 | P-1                                                                                             | P-1                                                                                         | P-1                                                                                                          |
| a/Å                                         | 13.7566(3)                                                                                      | 10.4191(2)                                                                                  | 10.46661(10)                                                                                                 |
| b/Å                                         | 14.5509(3)                                                                                      | 18.3885(3)                                                                                  | 23.8858(3)                                                                                                   |
| c/Å                                         | 18.1357(4)                                                                                      | 26.4258(6)                                                                                  | 24.0457(2)                                                                                                   |
| α/°                                         | 83.2409(18)                                                                                     | 73.686(2)                                                                                   | 86.0189(9)                                                                                                   |
| β/°                                         | 87.432(2)                                                                                       | 88.364(2)                                                                                   | 82.6961(8)                                                                                                   |
| γ/°                                         | 63.772(2)                                                                                       | 89.8450(10)                                                                                 | 88.0689(9)                                                                                                   |
| Volume/Å <sup>3</sup>                       | 3233.74(14)                                                                                     | 4857.05(17)                                                                                 | 5946.46(11)                                                                                                  |
| Z                                           | 2                                                                                               | 4                                                                                           | 4                                                                                                            |
| ρ <sub>calc</sub> /cm <sup>3</sup>          | 1.495                                                                                           | 1.547                                                                                       | 1.576                                                                                                        |
| μ/mm <sup>-1</sup>                          | 5.036                                                                                           | 3.281                                                                                       | 5.287                                                                                                        |
| F(000)                                      | 1501                                                                                            | 2328                                                                                        | 2880                                                                                                         |
| Crystal size/mm <sup>3</sup>                | 1 × 0.8 × 0.03                                                                                  | 0.2 × 0.1 × 0.02                                                                            | 0.4 × 0.05 × 0.05                                                                                            |
| Radiation                                   | Cu Kα (λ = 1.54184)                                                                             | Cu Kα (λ = 1.54184)                                                                         | Cu Kα (λ = 1.54184)                                                                                          |
| 2θ range for data collection/°              | 4.906 to 156.35                                                                                 | 5.008 to 155.986                                                                            | 3.71 to 157.104                                                                                              |
| Index ranges                                | -17 ≤ h ≤ 17, -14 ≤ k ≤ 18, -21 ≤ l ≤ 22                                                        | -11 ≤ h ≤ 13, -23 ≤ k ≤ 22, -33 ≤ l ≤ 32                                                    | -13 ≤ h ≤ 11, -29 ≤ k ≤ 30, -30 ≤ l ≤ 30                                                                     |
| Reflections collected                       | 44015                                                                                           | 55744                                                                                       | 112360                                                                                                       |
| Independent reflections                     | 13170 [R <sub>int</sub> = 0.0818, R <sub>sigma</sub> = 0.0562]                                  | 19059 [R <sub>int</sub> = 0.0507, R <sub>sigma</sub> = 0.0380]                              | 24377 [R <sub>int</sub> = 0.0705, R <sub>sigma</sub> = 0.0379]                                               |
| Data/restraints/parameters                  | 13170/93/912                                                                                    | 19059/2/1351                                                                                | 24377/0/1586                                                                                                 |
| Goodness-of-fit on F <sup>2</sup>           | 1.086                                                                                           | 1.068                                                                                       | 1.084                                                                                                        |
| Final R indexes [I ≥ 2σ (I)]                | R <sub>1</sub> = 0.0743, wR <sub>2</sub> = 0.2201                                               | R <sub>1</sub> = 0.1140, wR <sub>2</sub> = 0.3014                                           | R <sub>1</sub> = 0.0869, wR <sub>2</sub> = 0.2143                                                            |
| Final R indexes [all data]                  | R <sub>1</sub> = 0.0835, wR <sub>2</sub> = 0.2322                                               | R <sub>1</sub> = 0.1215, wR <sub>2</sub> = 0.3080                                           | R <sub>1</sub> = 0.0940, wR <sub>2</sub> = 0.2175                                                            |
| Largest diff. peak/hole / e Å <sup>-3</sup> | 1.16/-0.74                                                                                      | 2.73/-1.25                                                                                  | 1.44/-1.07                                                                                                   |



| Identification code                                   | <i>M</i> -16·TTF·0.5 DCE                                                                      | <i>P</i> -16·TTF·0.5 DCE                                                                      |
|-------------------------------------------------------|-----------------------------------------------------------------------------------------------|-----------------------------------------------------------------------------------------------|
| CCDC No.                                              | 2261292                                                                                       | 2261293                                                                                       |
| Empirical formula                                     | C <sub>49</sub> H <sub>36</sub> ClF <sub>4</sub> N <sub>8</sub> O <sub>6</sub> S <sub>6</sub> | C <sub>49</sub> H <sub>36</sub> ClF <sub>4</sub> N <sub>8</sub> O <sub>6</sub> S <sub>6</sub> |
| Formula weight                                        | 1136.67                                                                                       | 1136.67                                                                                       |
| Temperature/K                                         | 172.99(10)                                                                                    | 100.01(10)                                                                                    |
| Crystal system                                        | monoclinic                                                                                    | monoclinic                                                                                    |
| Space group                                           | P2 <sub>1</sub>                                                                               | P2 <sub>1</sub>                                                                               |
| <i>a</i> /Å                                           | 10.6988(4)                                                                                    | 10.6362(5)                                                                                    |
| <i>b</i> /Å                                           | 17.9646(7)                                                                                    | 18.0095(11)                                                                                   |
| <i>c</i> /Å                                           | 27.0532(16)                                                                                   | 26.978(2)                                                                                     |
| $\alpha$ /°                                           | 90                                                                                            | 90                                                                                            |
| $\beta$ /°                                            | 94.936(5)                                                                                     | 94.741(6)                                                                                     |
| $\gamma$ /°                                           | 90                                                                                            | 90                                                                                            |
| Volume/Å <sup>3</sup>                                 | 5180.3(4)                                                                                     | 5150.1(6)                                                                                     |
| <i>Z</i>                                              | 4                                                                                             | 4                                                                                             |
| $\rho_{\text{calc}}$ /cm <sup>3</sup>                 | 1.457                                                                                         | 1.466                                                                                         |
| $\mu$ /mm <sup>-1</sup>                               | 3.528                                                                                         | 3.549                                                                                         |
| F(000)                                                | 2332                                                                                          | 2332                                                                                          |
| Crystal size/mm <sup>3</sup>                          | 0.3 × 0.05 × 0.005                                                                            | 0.6 × 0.1 × 0.05                                                                              |
| Radiation                                             | CuK $\alpha$ ( $\lambda$ = 1.54184)                                                           | Cu K $\alpha$ ( $\lambda$ = 1.54184)                                                          |
| 2 $\theta$ range for data collection/°                | 4.92 to 155.812                                                                               | 8.208 to 179.436                                                                              |
| Index ranges                                          | -13 ≤ <i>h</i> ≤ 13, -22 ≤ <i>k</i> ≤ 22, -32 ≤ <i>l</i> ≤ 34                                 | -13 ≤ <i>h</i> ≤ 13, -22 ≤ <i>k</i> ≤ 22, 0 ≤ <i>l</i> ≤ 34                                   |
| Reflections collected                                 | 97629                                                                                         | 20346                                                                                         |
| Independent reflections                               | 19867 [R <sub>int</sub> = 0.1474, R <sub>sigma</sub> = 0.0648]                                | 20346 [R <sub>int</sub> = ?, R <sub>sigma</sub> = 0.0768]                                     |
| Data/restraints/parameters                            | 19867/721/1286                                                                                | 20346/893/1364                                                                                |
| Goodness-of-fit on F <sup>2</sup>                     | 1.063                                                                                         | 1.019                                                                                         |
| Final R indexes [ <i>I</i> ≥ 2 $\sigma$ ( <i>I</i> )] | R <sub>1</sub> = 0.1347, wR <sub>2</sub> = 0.3117                                             | R <sub>1</sub> = 0.1335, wR <sub>2</sub> = 0.2780                                             |
| Final R indexes [all data]                            | R <sub>1</sub> = 0.1556, wR <sub>2</sub> = 0.3245                                             | R <sub>1</sub> = 0.1602, wR <sub>2</sub> = 0.2956                                             |
| Largest diff. peak/hole / e Å <sup>-3</sup>           | 1.06/-0.68                                                                                    | 1.27/-0.97                                                                                    |
| Flack parameter                                       | 0.105(13)                                                                                     | 0.069(13)                                                                                     |

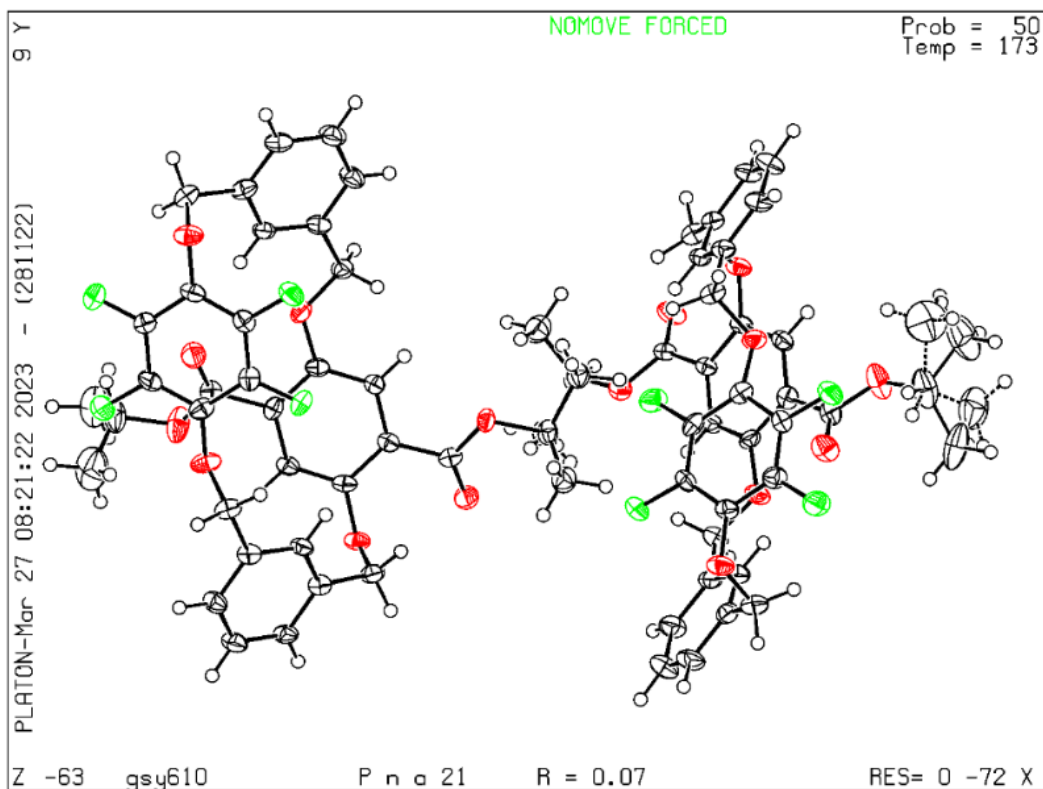

**Figure S14A.** X-ray molecular structure of *race-7a* (CCDC 2261277). The molecular is depicted in stick-ellipsoid style at 50% probability level for all atoms.

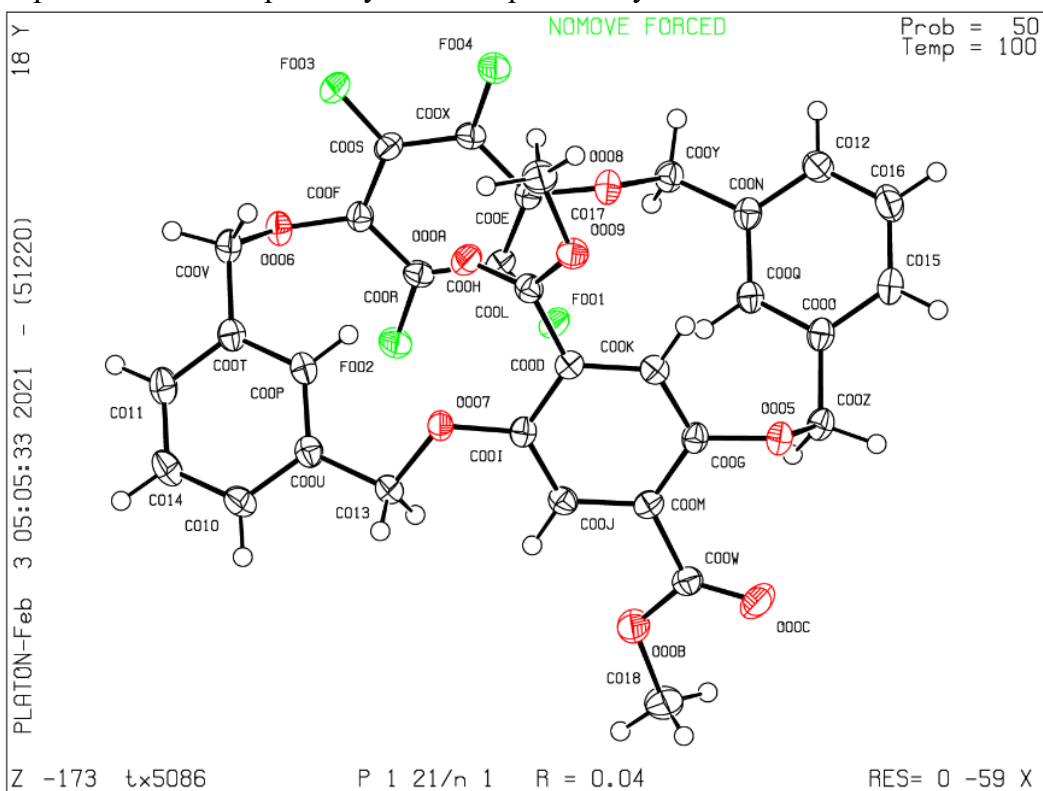

**Figure S14B.** X-ray molecular structure of **7b** (CCDC 2261278). The molecular is depicted in stick-ellipsoid style at 50% probability level for all atoms.

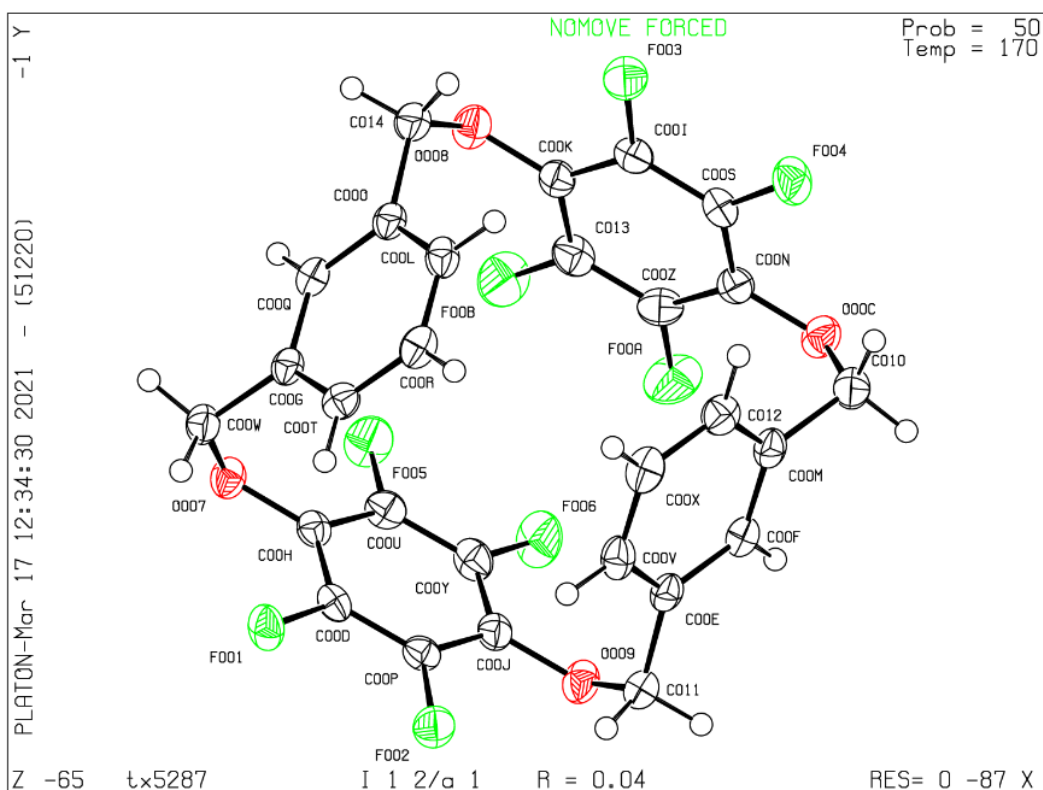

**Figure S14C.** X-ray molecular structure of **7c** (CCDC 2261279). The molecular is depicted in stick-ellipsoid style at 50% probability level for all atoms.

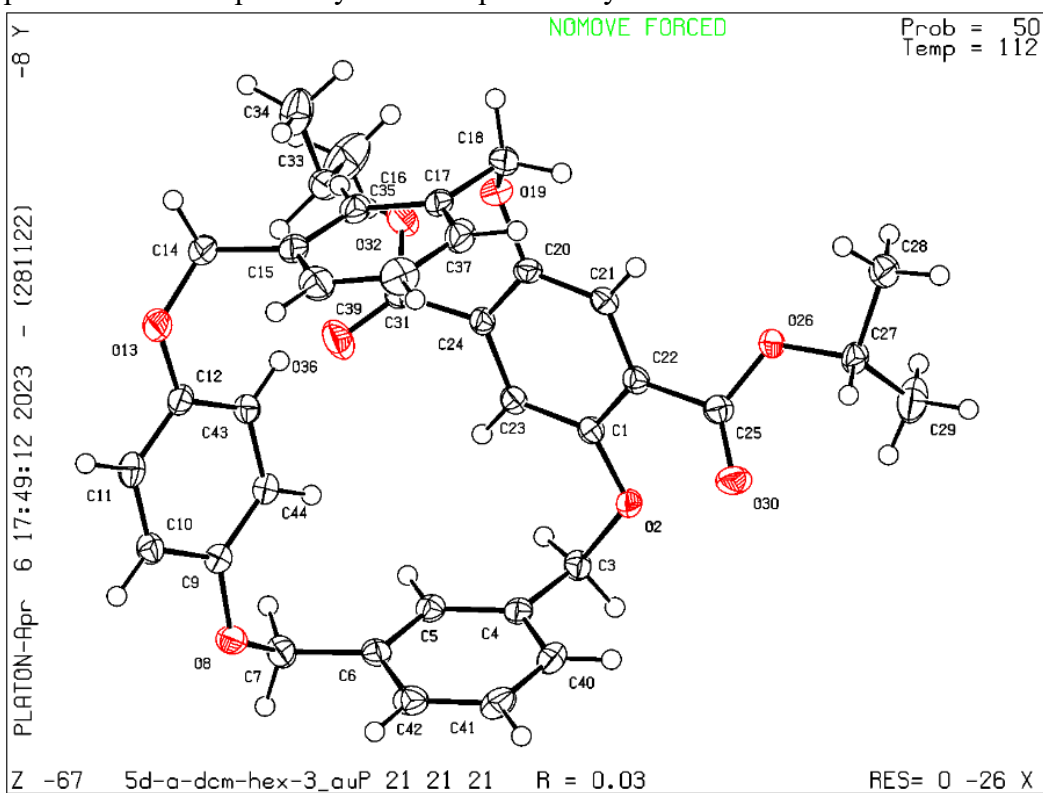

**Figure S14D.** X-ray molecular structure of *P*-**7d** (CCDC 2261291). The molecular is depicted in stick-ellipsoid style at 50% probability level for all atoms.

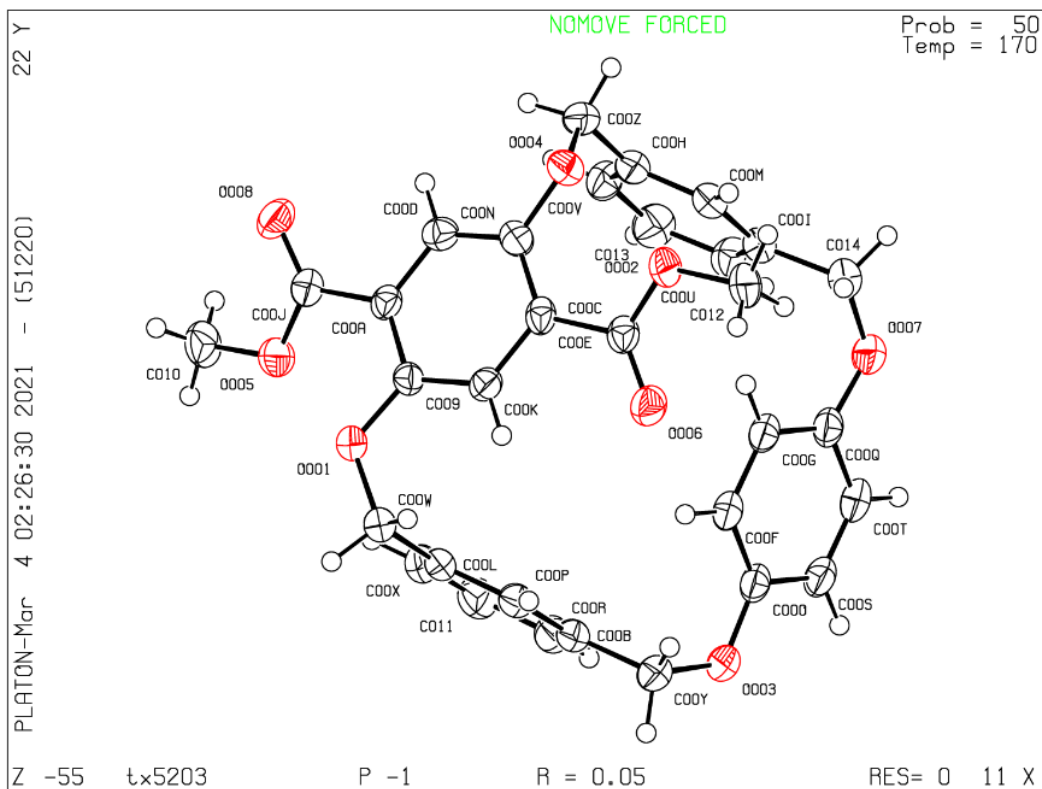

**Figure S14E.** X-ray molecular structure of **7e** (CCDC 2261280). The molecular is depicted in stick-ellipsoid style at 50% probability level for all atoms.

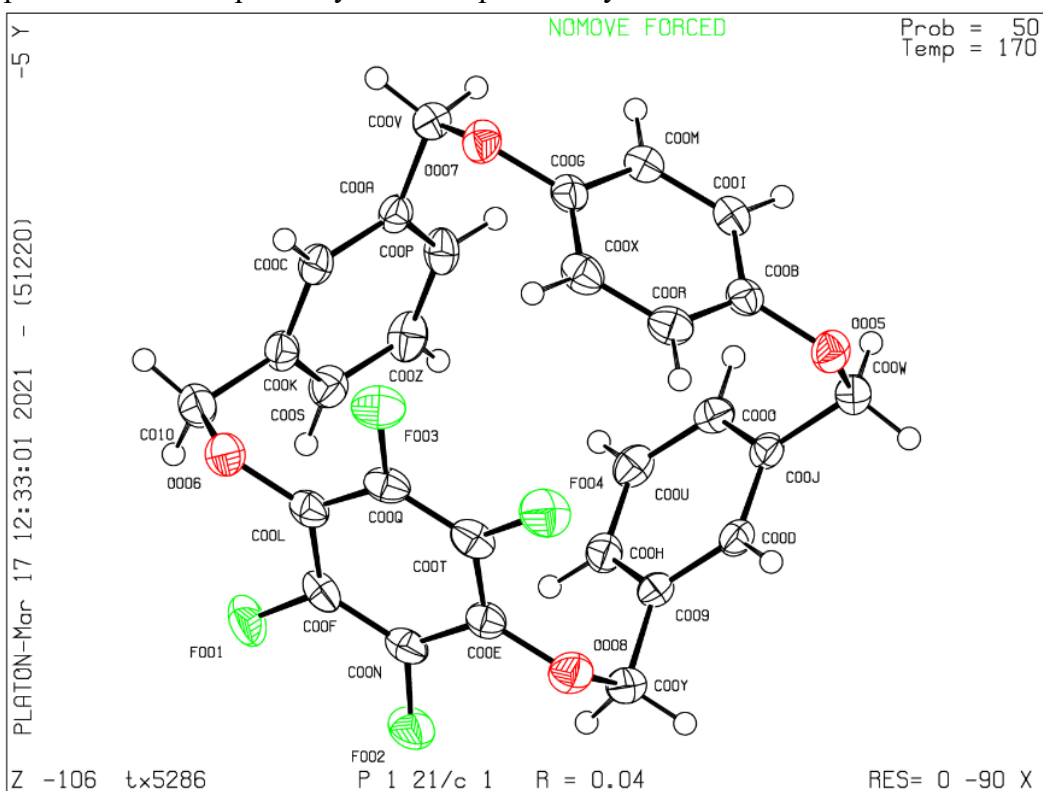

**Figure S14F.** X-ray molecular structure of **7f** (CCDC 2261281). The molecular is depicted in stick-ellipsoid style at 50% probability level for all atoms.

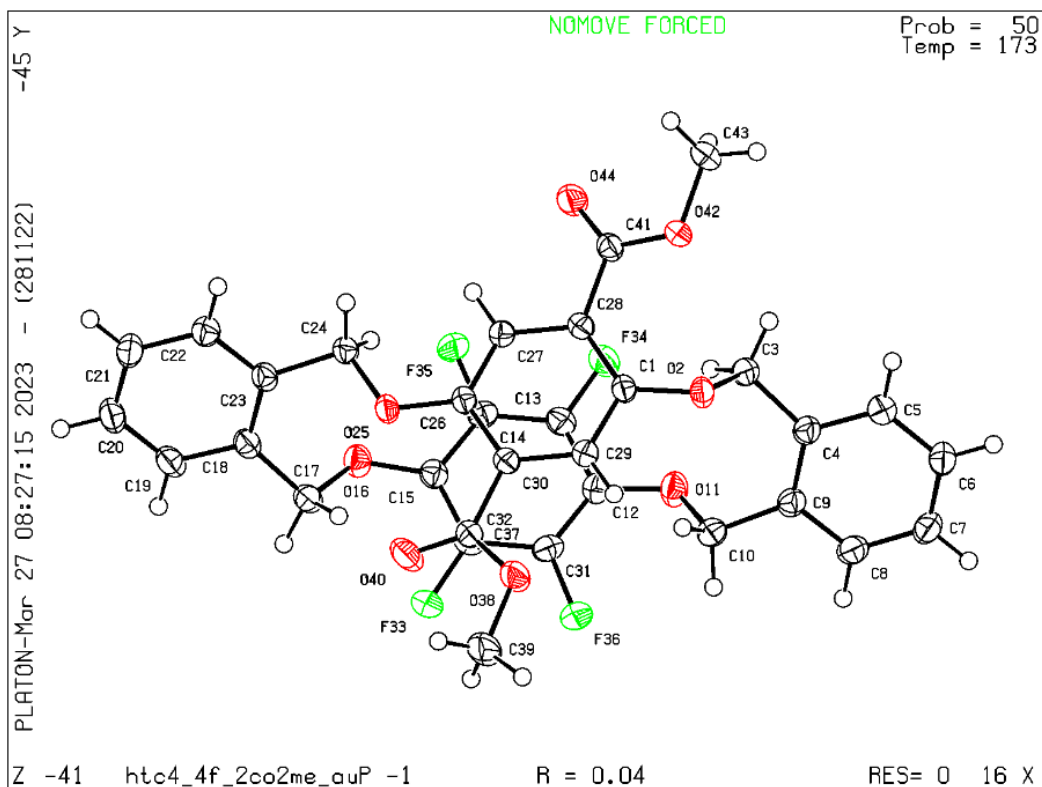

**Figure S14G.** X-ray molecular structure of *race-8* (CCDC 2261282). The molecular is depicted in stick-ellipsoid style at 50% probability level for all atoms.

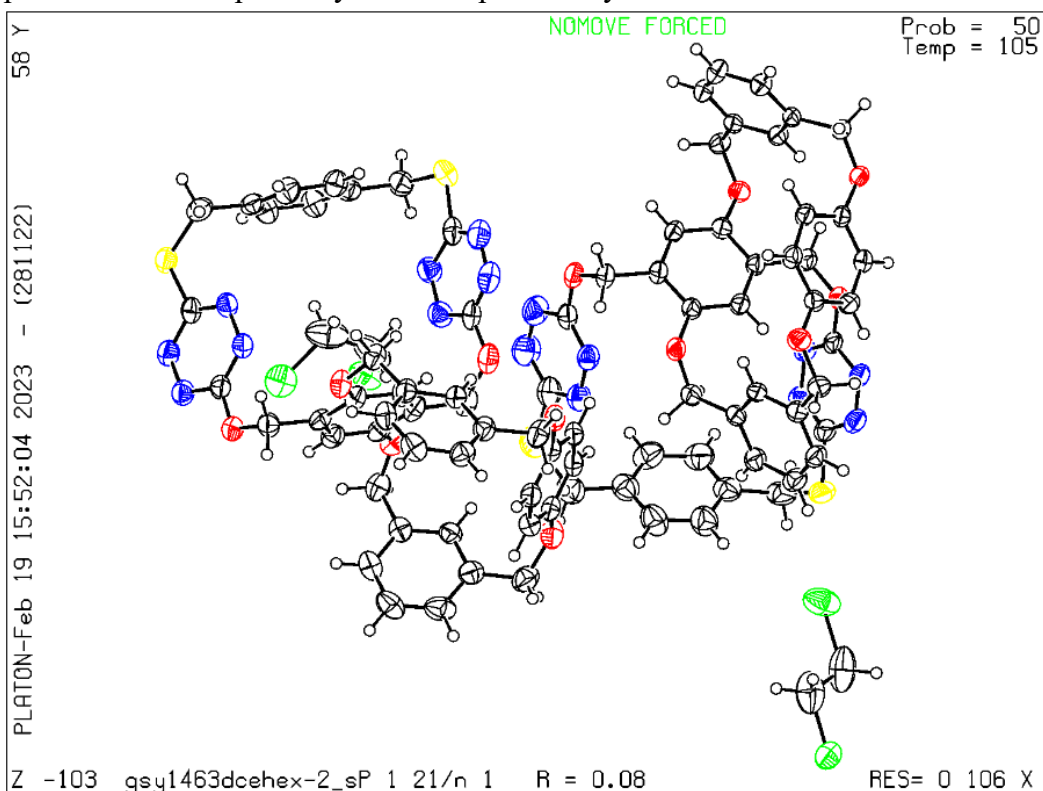

**Figure S14H.** X-ray molecular structure of *race-15* (CCDC 2261283). The molecular is depicted in stick-ellipsoid style at 50% probability level for all atoms.

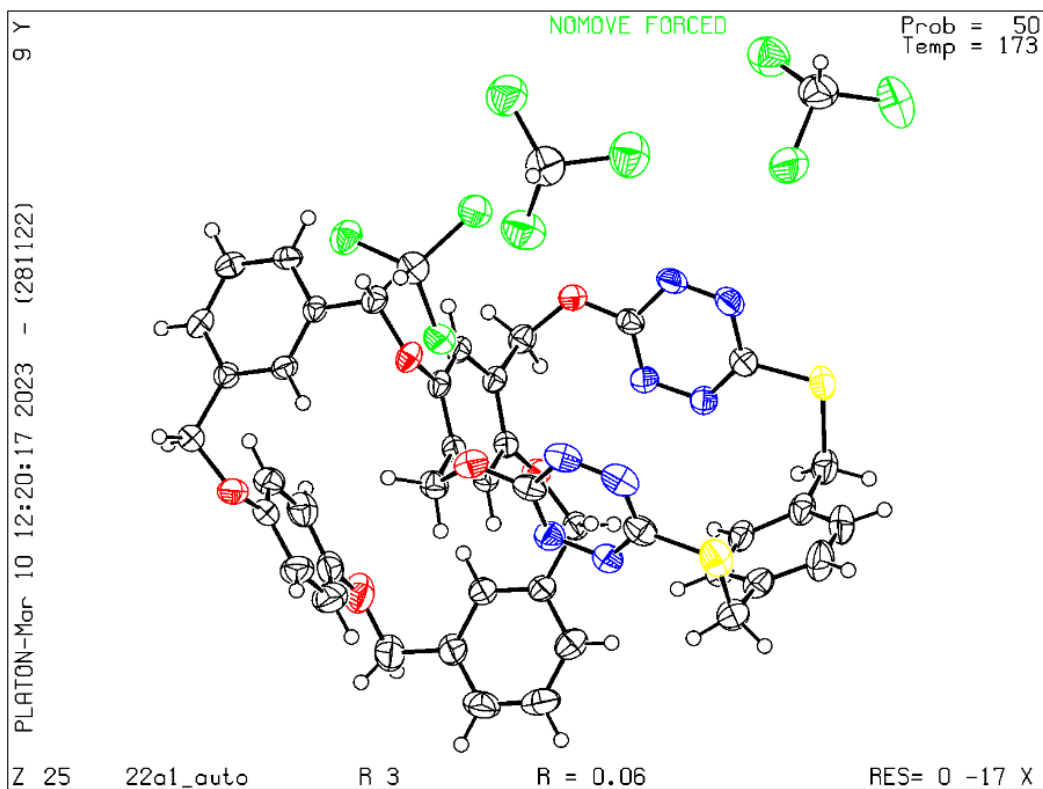

**Figure S14I.** X-ray molecular structure of *M-15* (CCDC 2261299). The molecular is depicted in stick-ellipsoid style at 50% probability level for all atoms.

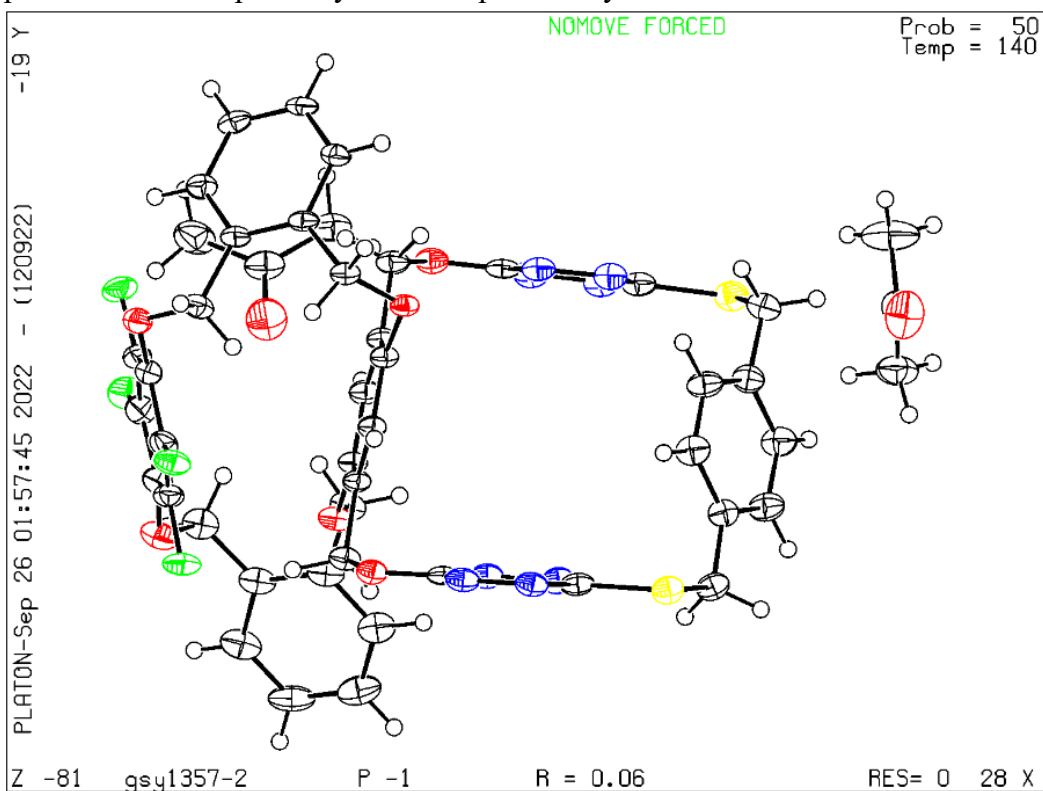

**Figure S14J.** X-ray molecular structure of *race-16* (CCDC 2261284). The molecular is depicted in stick-ellipsoid style at 50% probability level for all atoms.

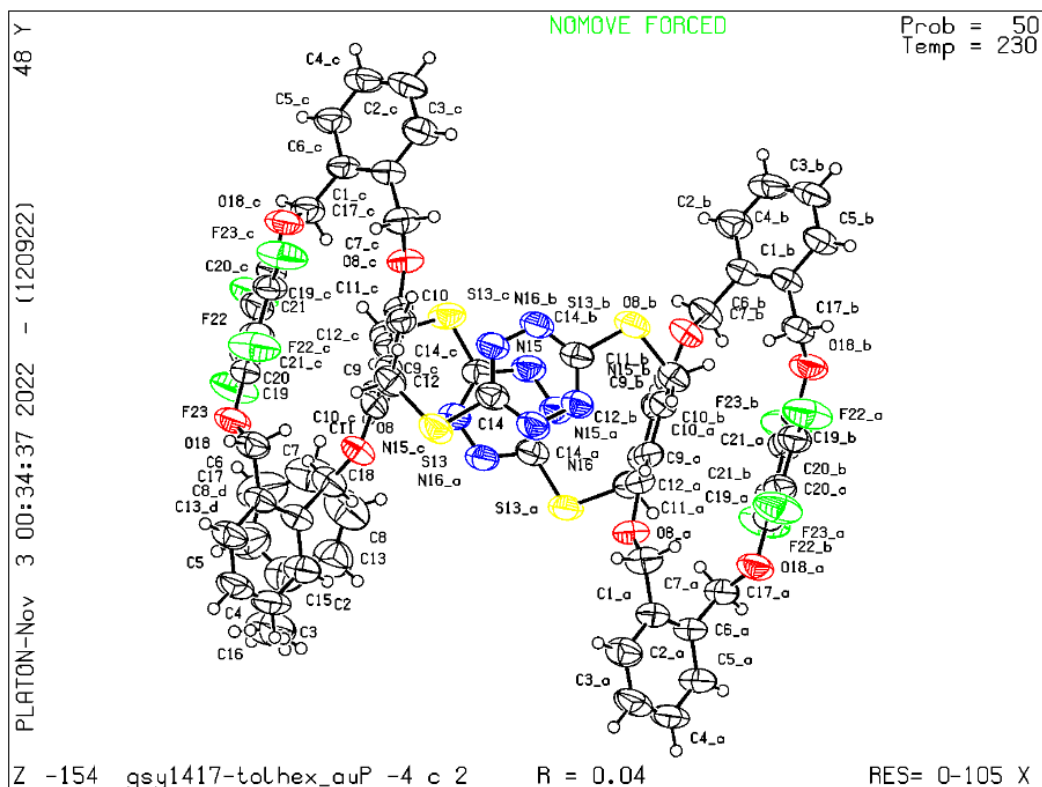

**Figure S14K.** X-ray molecular structure of *race-25b* (CCDC 2261285). The molecular is depicted in stick-ellipsoid style at 50% probability level for all atoms.

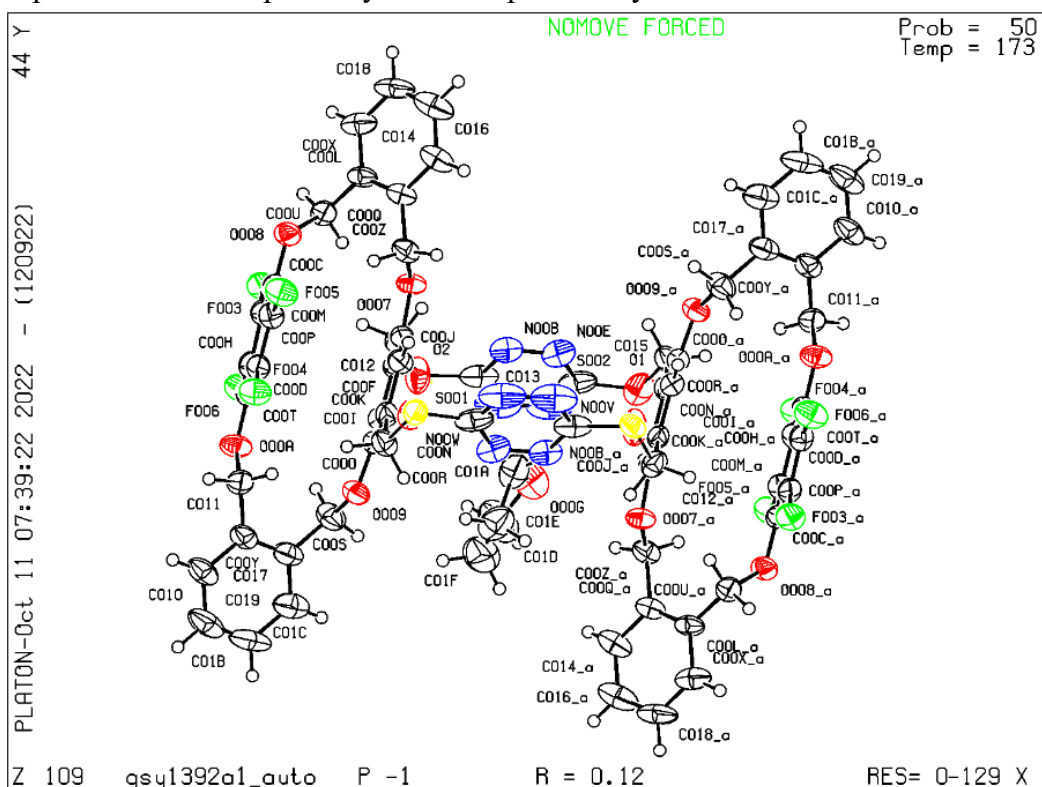

**Figure S14L.** X-ray molecular structure of *race-26a* (CCDC 2261286). The molecular is depicted in stick-ellipsoid style at 50% probability level for all atoms.

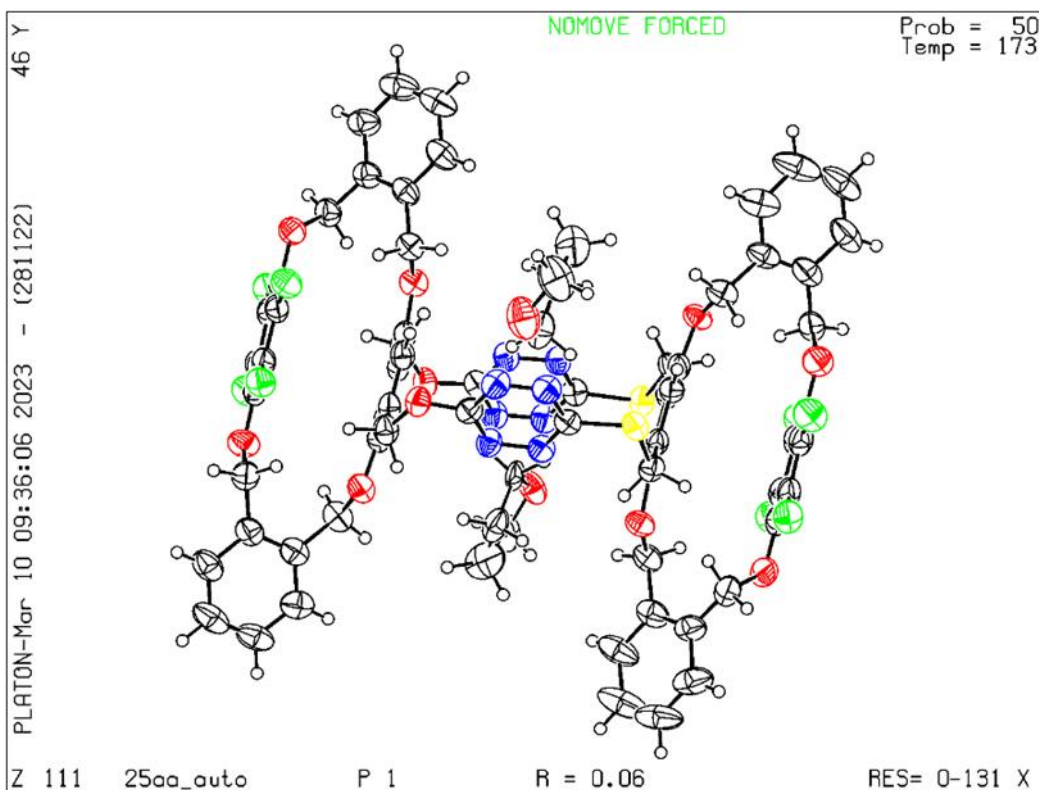

**Figure S14M.** X-ray molecular structure of *P,M*-**26a** (CCDC 2261294). The molecular is depicted in stick-ellipsoid style at 50% probability level for all atoms.

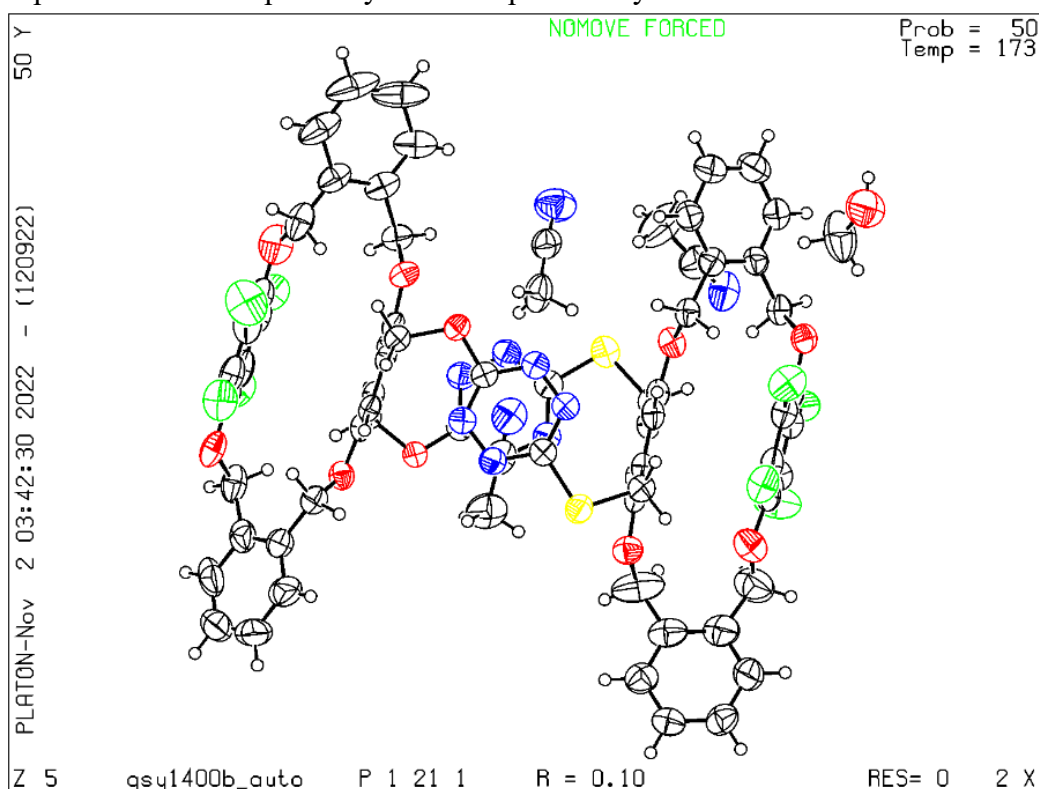

**Figure S14N.** X-ray molecular structure of *race*-**26b** (CCDC 2261287). The molecular is depicted in stick-ellipsoid style at 50% probability level for all atoms.



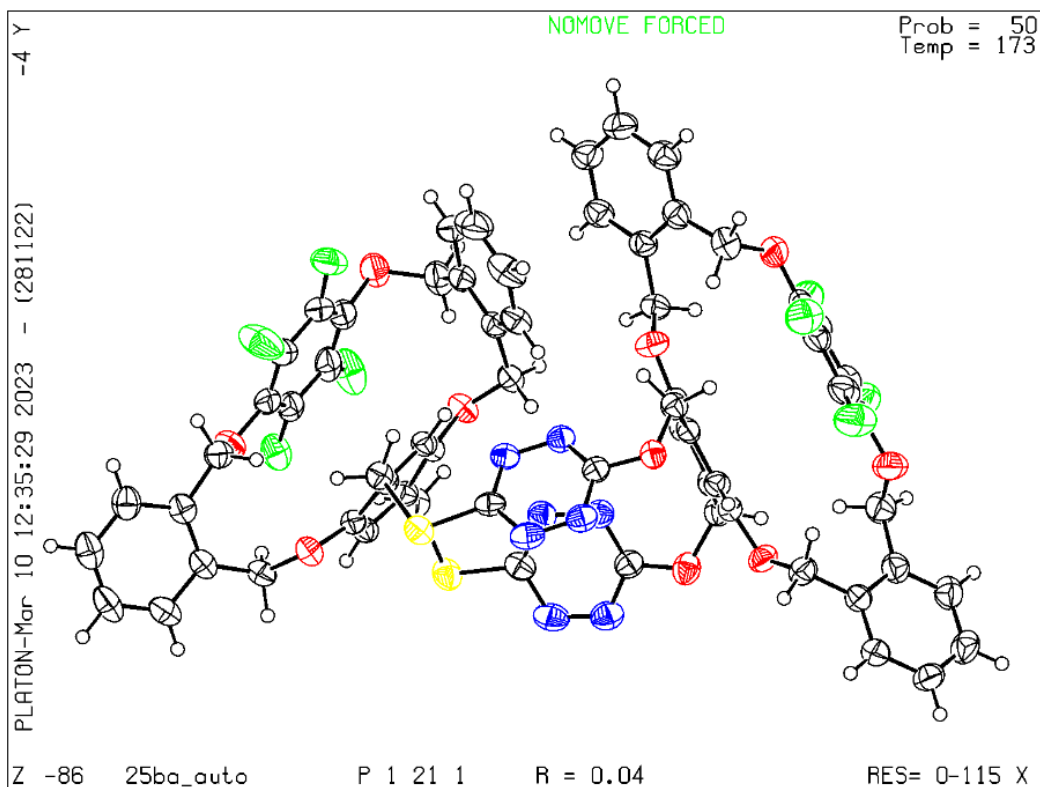

**Figure S14O.** X-ray molecular structure of *P,P*-**26b** (CCDC 2261295). The molecular is depicted in stick-ellipsoid style at 50% probability level for all atoms.

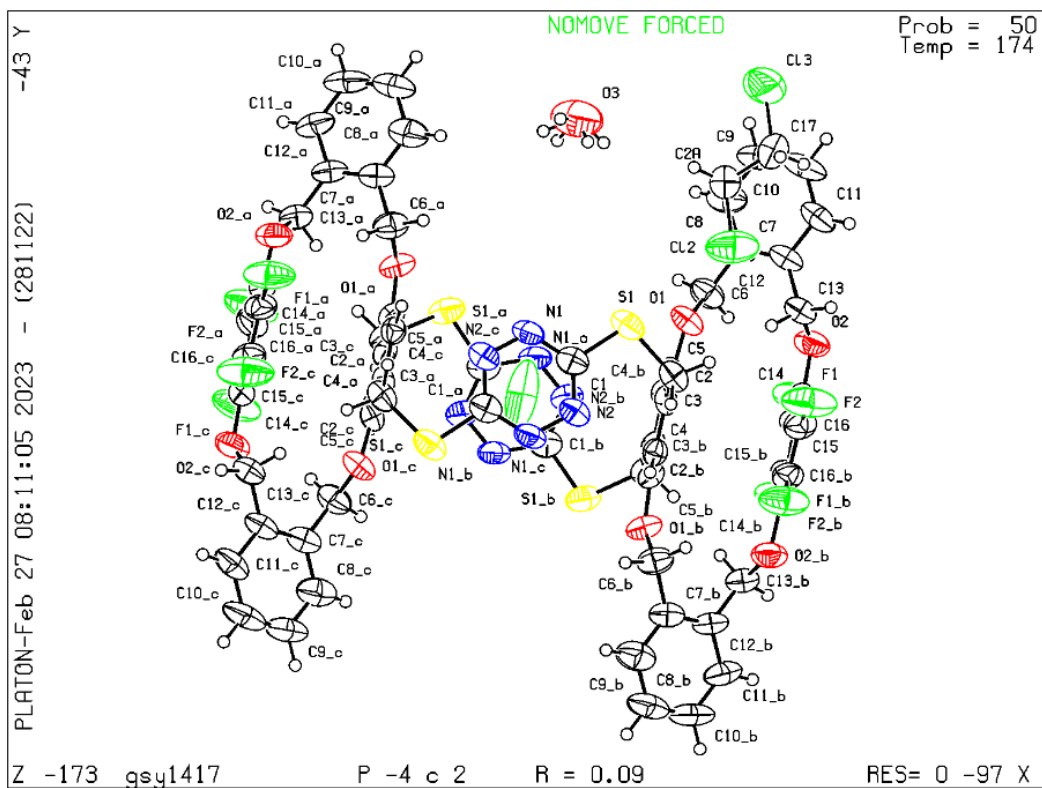

**Figure S14P.** X-ray molecular structure of [*rac*-**25b**·H<sub>3</sub>O<sup>+</sup>Cl<sup>-</sup>] (CCDC 2261288). The molecular is depicted in stick-ellipsoid style at 50% probability level for all atoms.

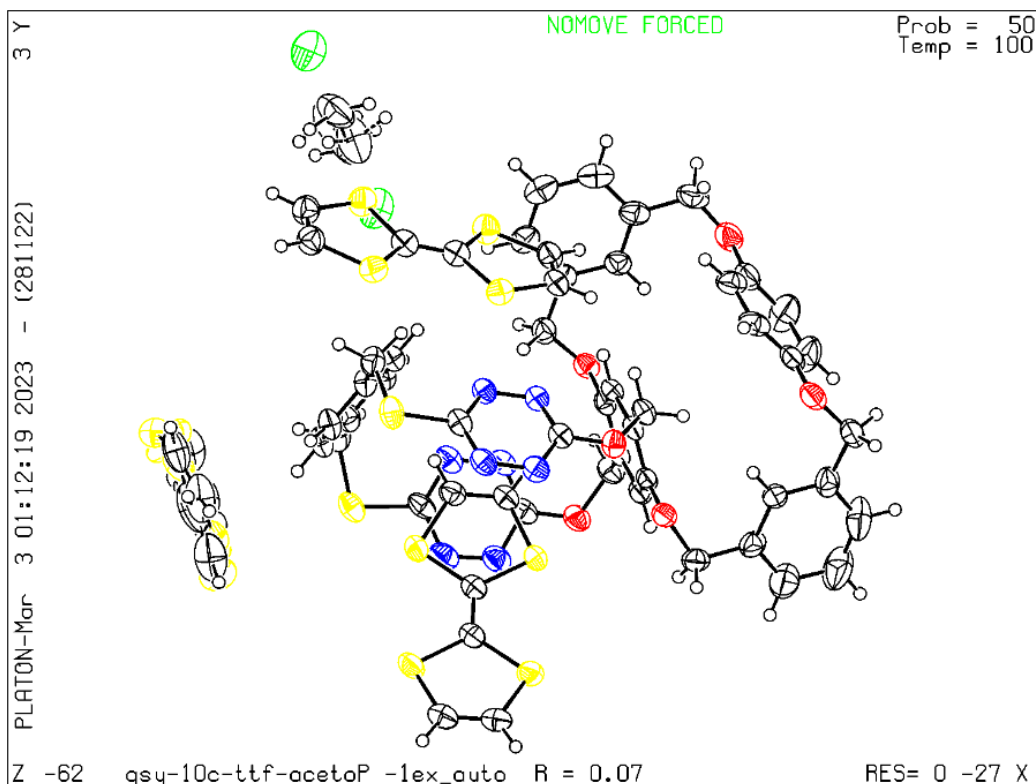

**Figure S14Q.** X-ray molecular structure of [*race-15*·3TTF] (CCDC 2261229). The molecular is depicted in stick-ellipsoid style at 50% probability level for all atoms.

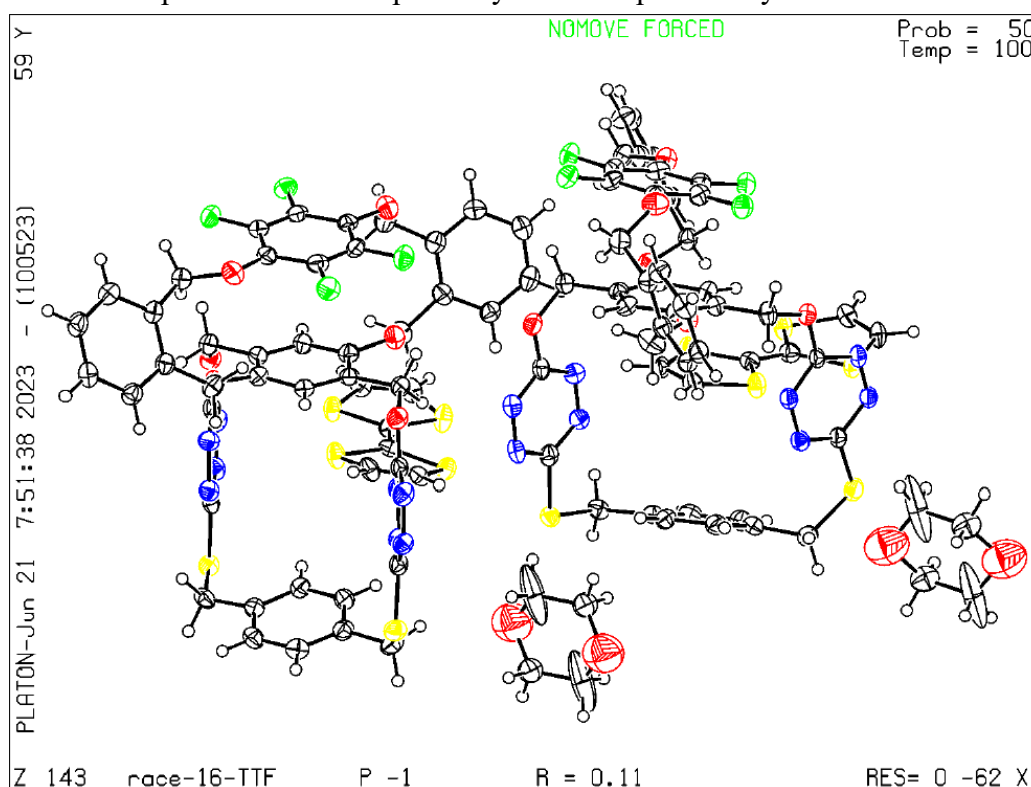

**Figure S14R.** X-ray molecular structure of [*race-16*·TTF] (CCDC 2261298). The molecular is depicted in stick-ellipsoid style at 50% probability level for all atoms.

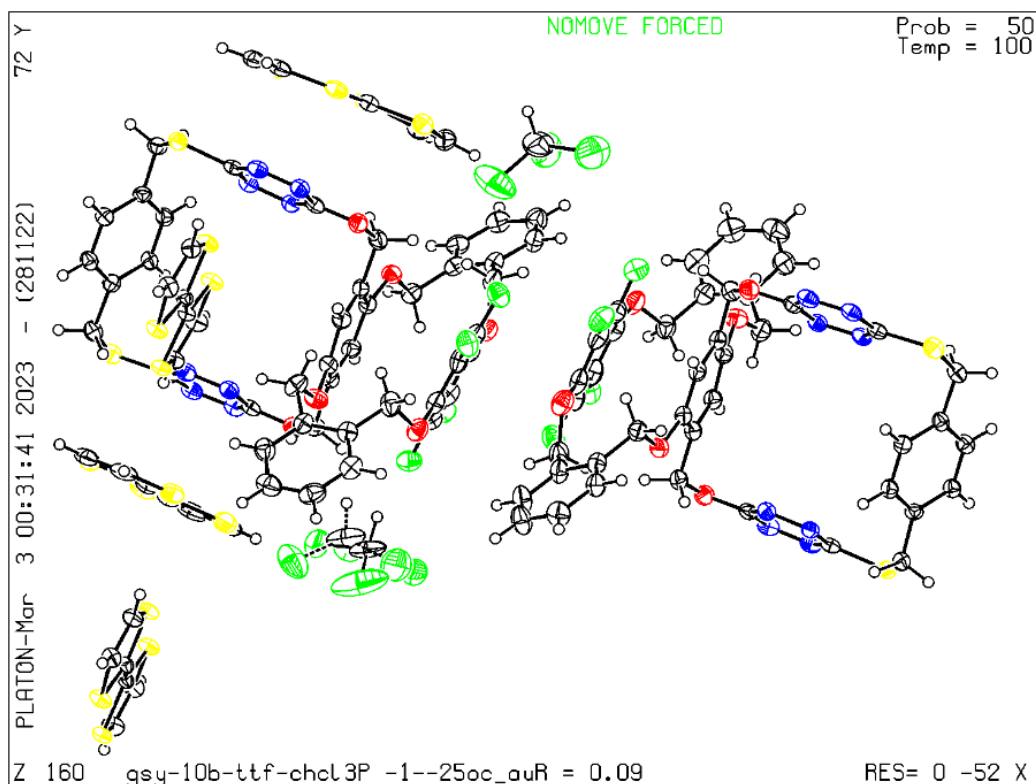

**Figure S14S.** X-ray molecular structure of [*race*-16·2TTF] (CCDC 2261290). The molecular is depicted in stick-ellipsoid style at 50% probability level for all atoms.

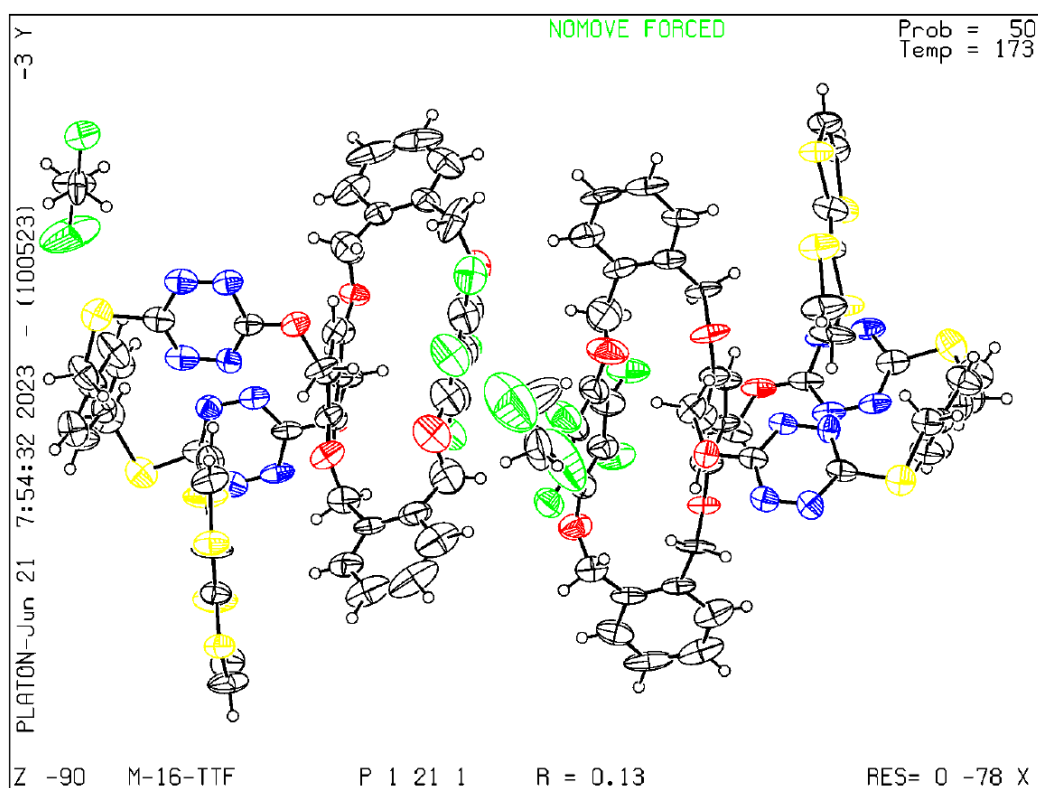

**Figure S14T.** X-ray molecular structure of [*M*-16·TTF] (CCDC 2261292). The molecular is depicted in stick-ellipsoid style at 50% probability level for all atoms.

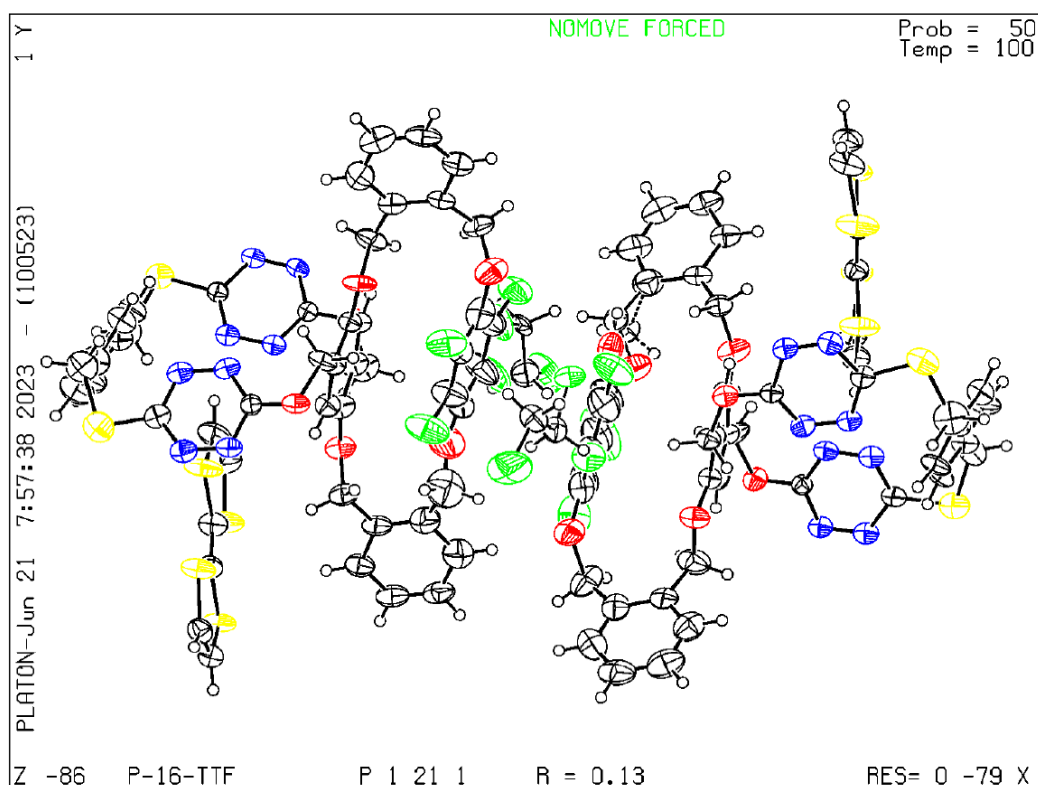

**Figure S14U.** X-ray molecular structure of [P-16·TTF] (CCDC 2261293). The molecular is depicted in stick-ellipsoid style at 50% probability level for all atoms.

#### 4. HPLC Resolution of Chiral Macrocycles

**Table S13.** HPLC resolution of chiral macrocycles

| Compound   | Column     | Speed      | Mobile phase                                              | Retention time (min)                                       |
|------------|------------|------------|-----------------------------------------------------------|------------------------------------------------------------|
| <b>7a</b>  | Daciel® IA | 0.5 mL/min | CHCl <sub>3</sub> : <i>i</i> PrOH : Hexane = 3 : 1 : 21   | <i>t</i> <sub>1</sub> = 16.9, <i>t</i> <sub>2</sub> = 20.0 |
| <b>7d</b>  | Daciel® IA | 0.5 mL/min | CHCl <sub>3</sub> : <i>i</i> PrOH : Hexane = 3 : 1 : 21   | <i>t</i> <sub>1</sub> = 21.3, <i>t</i> <sub>2</sub> = 24.2 |
| <b>8</b>   | Daciel® IA | 0.5 mL/min | CHCl <sub>3</sub> : <i>i</i> PrOH : Hexane = 3 : 1 : 21   | <i>t</i> <sub>1</sub> = 16.5, <i>t</i> <sub>2</sub> = 40.0 |
| <b>10</b>  | Daciel® ID | 0.5 mL/min | <i>i</i> PrOH : Hexane = 2 : 3                            | <i>t</i> <sub>1</sub> = 19.1, <i>t</i> <sub>2</sub> = 25.4 |
| <b>12</b>  | Daciel® IB | 0.5 mL/min | DCM : Hexane = 2 : 3                                      | <i>t</i> <sub>1</sub> = 17.0, <i>t</i> <sub>2</sub> = 18.3 |
| <b>13</b>  | Daciel® IB | 0.5 mL/min | DCM : Hexane = 2 : 3                                      | <i>t</i> <sub>1</sub> = 15.7, <i>t</i> <sub>2</sub> = 22.5 |
| <b>15</b>  | Daciel® ID | 0.5 mL/min | CHCl <sub>3</sub> : <i>i</i> PrOH : Hexane = 3 : 1 : 6    | <i>t</i> <sub>1</sub> = 28.3, <i>t</i> <sub>2</sub> = 33.9 |
| <b>16</b>  | Daciel® ID | 0.5 mL/min | DCM : Hexane = 2 : 1                                      | <i>t</i> <sub>1</sub> = 11.9, <i>t</i> <sub>2</sub> = 15.7 |
| <b>18</b>  | Daciel® IB | 0.5 mL/min | <i>i</i> PrOH : Hexane = 1 : 4                            | <i>t</i> <sub>1</sub> = 15.2, <i>t</i> <sub>2</sub> = 16.3 |
| <b>20</b>  | Daciel® IA | 0.5 mL/min | CHCl <sub>3</sub> : <i>i</i> PrOH : Hexane = 27 : 9 : 164 | <i>t</i> <sub>1</sub> = 11.3, <i>t</i> <sub>2</sub> = 16.1 |
| <b>21</b>  | Daciel® IB | 0.5 mL/min | DCM : Hexane = 2 : 3                                      | <i>t</i> <sub>1</sub> = 11.2, <i>t</i> <sub>2</sub> = 12.2 |
| <b>22</b>  | Daciel® IB | 0.5 mL/min | DCM : Hexane = 2 : 3                                      | <i>t</i> <sub>1</sub> = 11.8, <i>t</i> <sub>2</sub> = 12.8 |
| <b>23b</b> | Daciel® IA | 0.5 mL/min | CHCl <sub>3</sub> : <i>i</i> PrOH : Hexane = 3 : 1 : 12   | <i>t</i> <sub>1</sub> = 18.6, <i>t</i> <sub>2</sub> = 24.1 |
| <b>24b</b> | Daciel® IA | 0.5 mL/min | CHCl <sub>3</sub> : <i>i</i> PrOH : Hexane = 9 : 3 : 28   | <i>t</i> <sub>1</sub> = 14.4, <i>t</i> <sub>2</sub> = 22.5 |
| <b>26a</b> | Daciel® IA | 0.5 mL/min | CHCl <sub>3</sub> : <i>i</i> PrOH : Hexane = 1 : 1 : 8    | <i>t</i> <sub>1</sub> = 18.3, <i>t</i> <sub>2</sub> = 24.0 |
| <b>26b</b> | Daciel® IA | 0.5 mL/min | CHCl <sub>3</sub> : <i>i</i> PrOH : Hexane = 3 : 1 : 21   | <i>t</i> <sub>1</sub> = 22.4, <i>t</i> <sub>2</sub> = 27.8 |

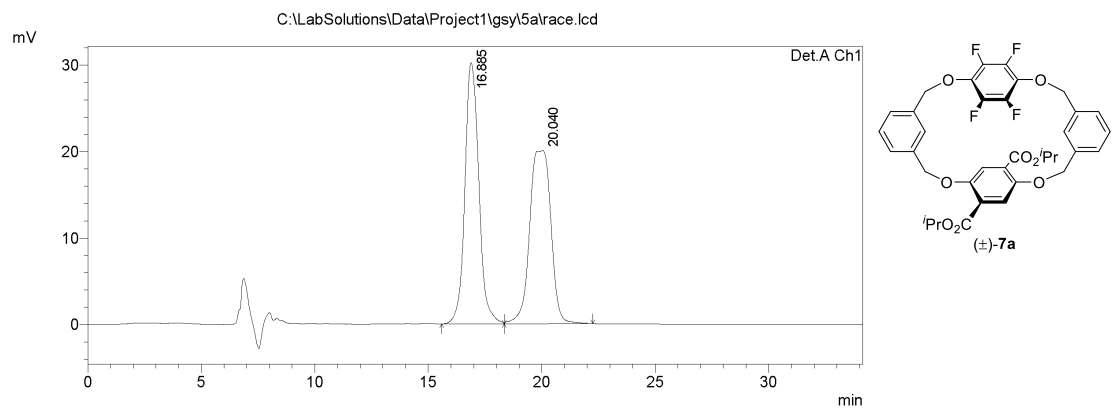

1 Det.A Ch1/254nm

PeakTable

| Peak# | Ret. Time | Area    | Height | Area %  | Height % |
|-------|-----------|---------|--------|---------|----------|
| 1     | 16.885    | 1296314 | 30227  | 49.843  | 60.140   |
| 2     | 20.040    | 1304499 | 20034  | 50.157  | 39.860   |
| Total |           | 2600812 | 50261  | 100.000 | 100.000  |

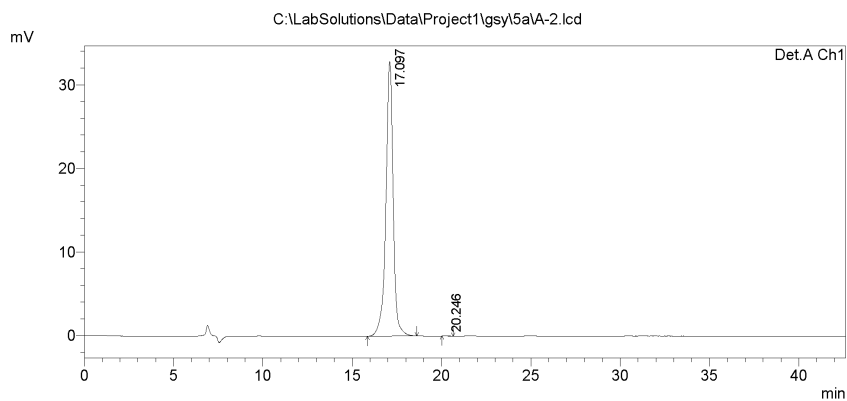

1 Det.A Ch1/254nm

PeakTable

| Peak# | Ret. Time | Area   | Height | Area %  | Height % |
|-------|-----------|--------|--------|---------|----------|
| 1     | 17.097    | 931331 | 32816  | 99.883  | 99.847   |
| 2     | 20.246    | 1086   | 50     | 0.117   | 0.153    |
| Total |           | 932417 | 32866  | 100.000 | 100.000  |

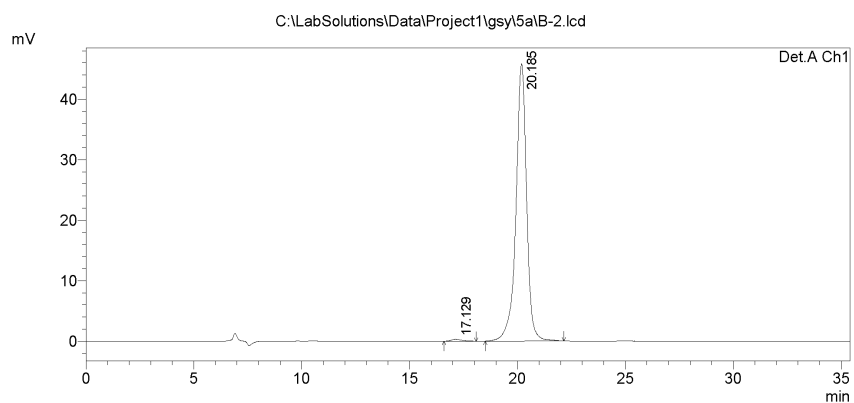

1 Det.A Ch1/254nm

PeakTable

| Peak# | Ret. Time | Area    | Height | Area %  | Height % |
|-------|-----------|---------|--------|---------|----------|
| 1     | 17.129    | 10847   | 312    | 0.683   | 0.676    |
| 2     | 20.185    | 1577863 | 45813  | 99.317  | 99.324   |
| Total |           | 1588711 | 46125  | 100.000 | 100.000  |

Figure S15. HPLC spectra of racemic, P-, and M-7a

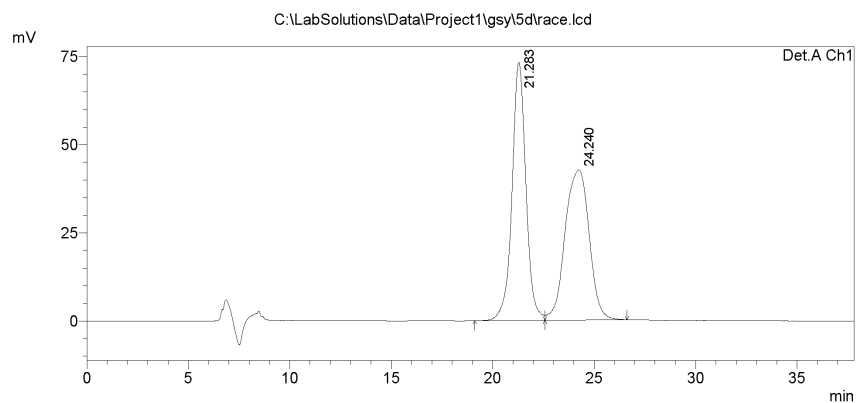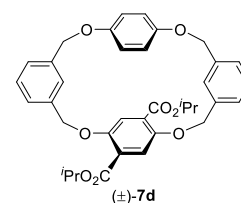

PeakTable

检测器 A Ch1 254nm

| Peak# | Ret. Time | Area    | Height | Area %  | Height % |
|-------|-----------|---------|--------|---------|----------|
| 1     | 21.283    | 3479477 | 73205  | 49.778  | 63.221   |
| 2     | 24.240    | 3510502 | 42587  | 50.222  | 36.779   |
| Total |           | 6989979 | 115792 | 100.000 | 100.000  |

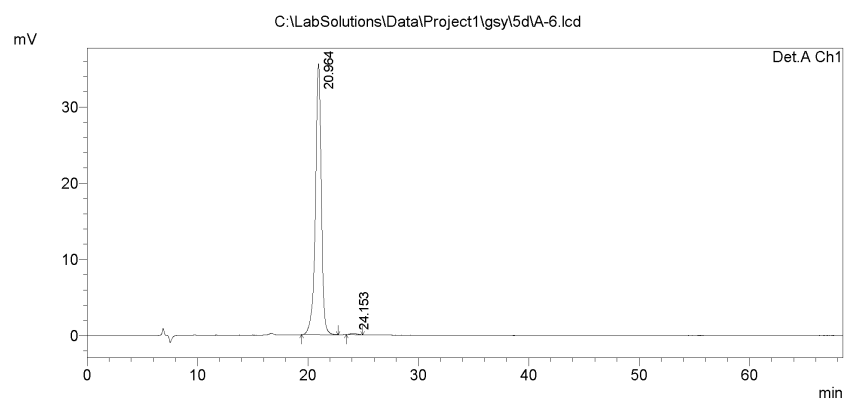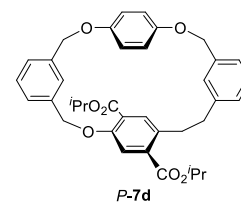

PeakTable

检测器 A Ch1 254nm

| Peak# | Ret. Time | Area    | Height | Area %  | Height % |
|-------|-----------|---------|--------|---------|----------|
| 1     | 20.964    | 1317140 | 35536  | 99.473  | 99.548   |
| 2     | 24.153    | 6978    | 161    | 0.527   | 0.452    |
| Total |           | 1324118 | 35698  | 100.000 | 100.000  |

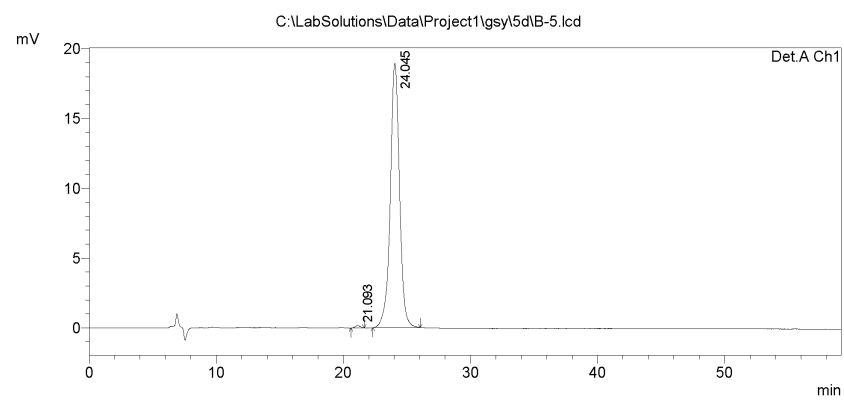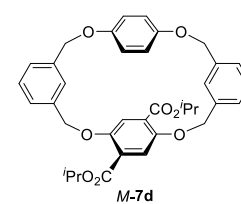

PeakTable

检测器 A Ch1 254nm

| Peak# | Ret. Time | Area   | Height | Area %  | Height % |
|-------|-----------|--------|--------|---------|----------|
| 1     | 21.083    | 5050   | 164    | 0.522   | 0.856    |
| 2     | 24.045    | 961606 | 18935  | 99.478  | 99.144   |
| Total |           | 966657 | 19098  | 100.000 | 100.000  |

Figure S16. HPLC spectra of racemic, P-, and M-7d

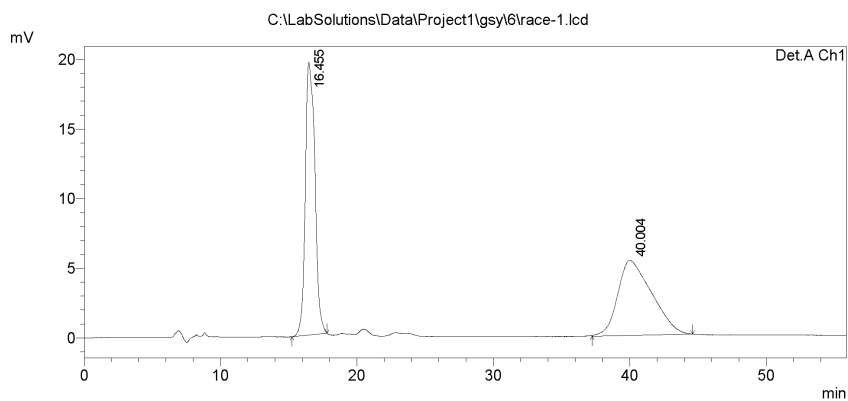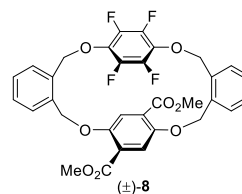

1 Det.A Ch1/335nm

PeakTable

| Peak# | Ret. Time | Area    | Height | Area %  | Height % |
|-------|-----------|---------|--------|---------|----------|
| 1     | 16.455    | 954986  | 19595  | 50.651  | 78.439   |
| 2     | 40.004    | 930446  | 5386   | 49.349  | 21.561   |
| Total |           | 1885433 | 24981  | 100.000 | 100.000  |

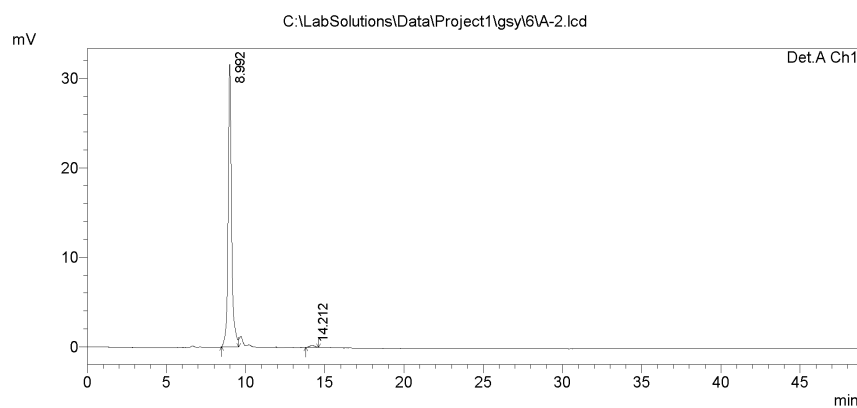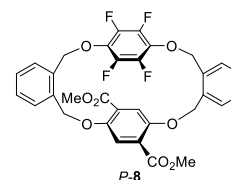

1 Det.A Ch1/335nm

PeakTable

| Peak# | Ret. Time | Area   | Height | Area %  | Height % |
|-------|-----------|--------|--------|---------|----------|
| 1     | 8.992     | 480802 | 31597  | 98.947  | 99.319   |
| 2     | 14.212    | 5118   | 217    | 1.053   | 0.681    |
| Total |           | 485919 | 31814  | 100.000 | 100.000  |

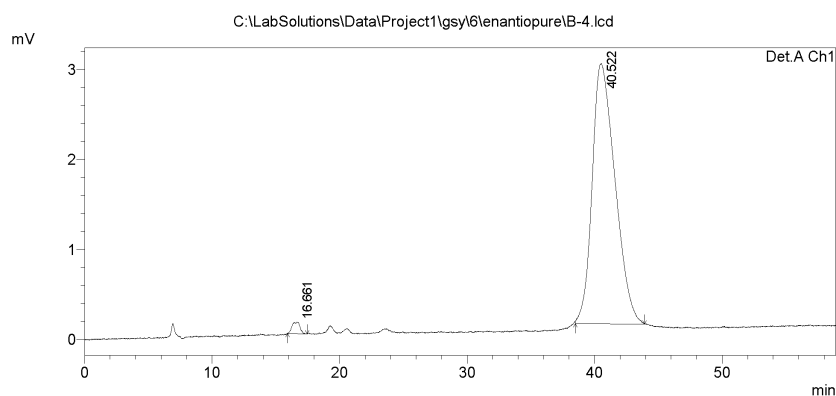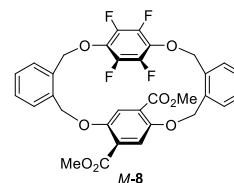

1 Det.A Ch1/335nm

PeakTable

| Peak# | Ret. Time | Area   | Height | Area %  | Height % |
|-------|-----------|--------|--------|---------|----------|
| 1     | 16.661    | 5335   | 126    | 1.456   | 4.182    |
| 2     | 40.522    | 361049 | 2896   | 98.544  | 95.818   |
| Total |           | 366384 | 3022   | 100.000 | 100.000  |

Figure S17. HPLC spectra of racemic, P-, and M-8

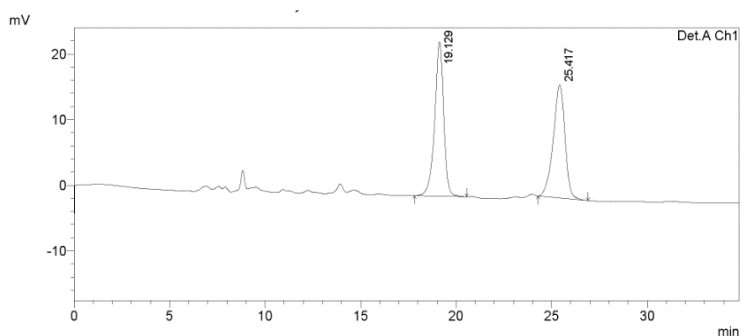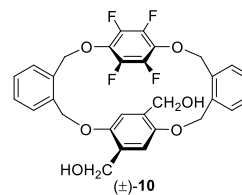

1 Det.A Ch1/254nm

PeakTable

| Peak# | Ret. Time | Area    | Height | Area %  | Height % |
|-------|-----------|---------|--------|---------|----------|
| 1     | 19.129    | 772861  | 23532  | 51.104  | 57.670   |
| 2     | 25.417    | 739463  | 17272  | 48.896  | 42.330   |
| Total |           | 1512324 | 40804  | 100.000 | 100.000  |

**Figure S18. HPLC spectra of racemic 10**

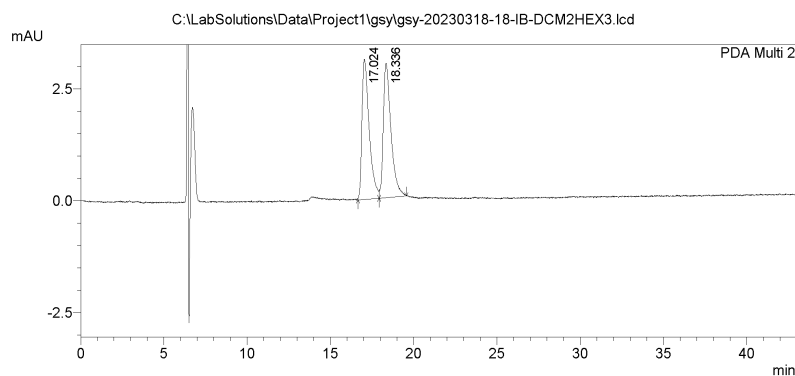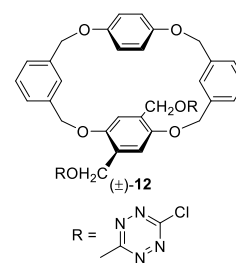

1 PDA Multi 2/525nm 4nm

PeakTable

| Peak# | Ret. Time | Area   | Height | Area %  | Height % |
|-------|-----------|--------|--------|---------|----------|
| 1     | 17.024    | 94503  | 3132   | 49.548  | 51.050   |
| 2     | 18.336    | 96227  | 3003   | 50.452  | 48.950   |
| Total |           | 190730 | 6134   | 100.000 | 100.000  |

**Figure S19. HPLC spectra of racemic 12**

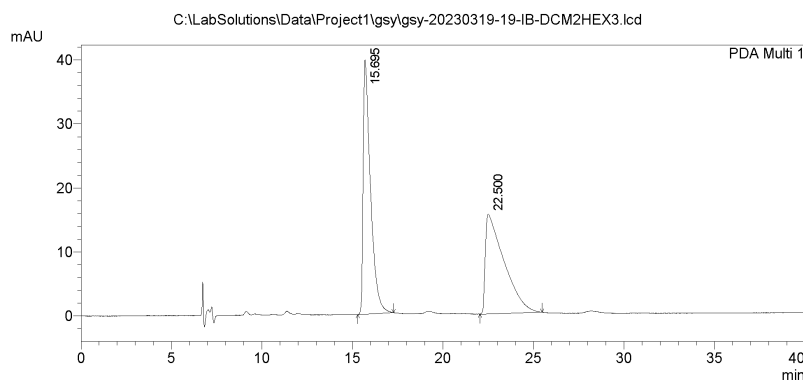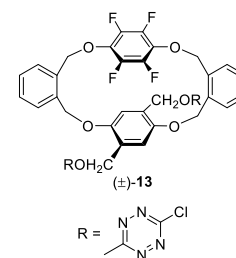

1 PDA Multi 1/525nm 4nm

PeakTable

| Peak# | Ret. Time | Area    | Height | Area %  | Height % |
|-------|-----------|---------|--------|---------|----------|
| 1     | 15.695    | 1117848 | 39709  | 50.011  | 71.831   |
| 2     | 22.500    | 1117352 | 15572  | 49.989  | 28.169   |
| Total |           | 2235200 | 55281  | 100.000 | 100.000  |

**Figure S20. HPLC spectra of racemic 13**



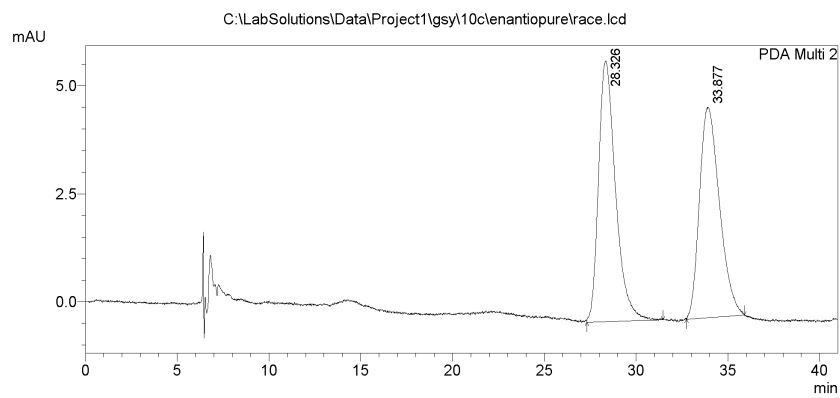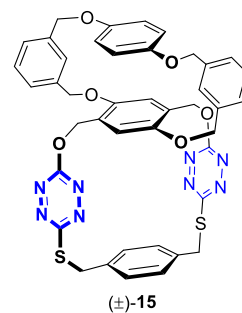

PeakTable

| Peak# | Ret. Time | Area   | Height | Area %  | Height % |
|-------|-----------|--------|--------|---------|----------|
| 1     | 28.326    | 388294 | 6037   | 51.219  | 55.307   |
| 2     | 33.877    | 369816 | 4878   | 48.781  | 44.693   |
| Total |           | 758110 | 10915  | 100.000 | 100.000  |

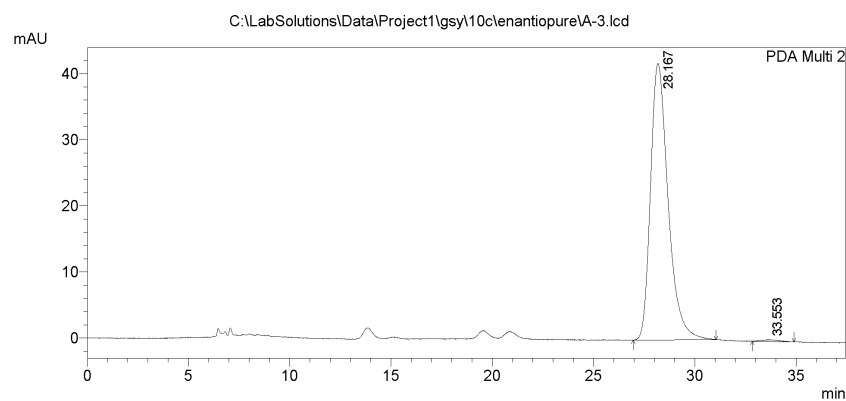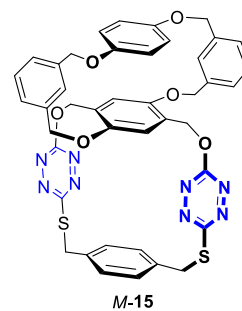

PeakTable

| Peak# | Ret. Time | Area    | Height | Area %  | Height % |
|-------|-----------|---------|--------|---------|----------|
| 1     | 28.167    | 2536390 | 41854  | 99.384  | 99.374   |
| 2     | 33.553    | 15710   | 264    | 0.616   | 0.626    |
| Total |           | 2552100 | 42118  | 100.000 | 100.000  |

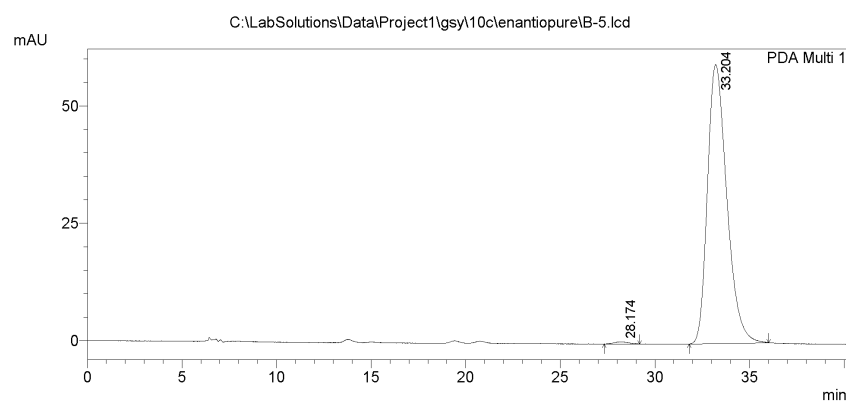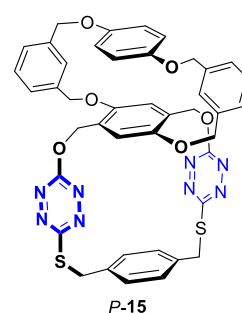

PeakTable

| Peak# | Ret. Time | Area    | Height | Area %  | Height % |
|-------|-----------|---------|--------|---------|----------|
| 1     | 28.174    | 24543   | 473    | 0.576   | 0.791    |
| 2     | 33.204    | 4234723 | 59390  | 99.424  | 99.209   |
| Total |           | 4259266 | 59864  | 100.000 | 100.000  |

Figure S21. HPLC spectra of racemic, *M*-, and *P*-15

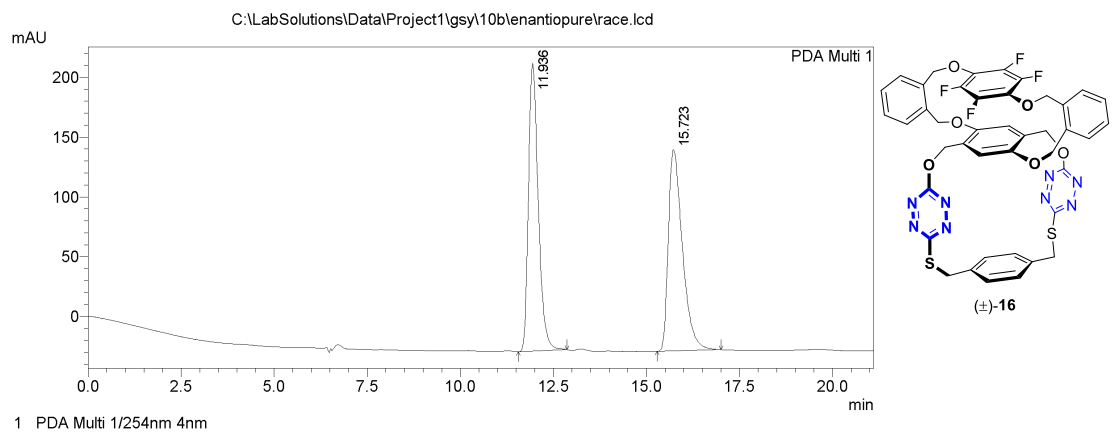

PeakTable

| Peak# | Ret. Time | Area    | Height | Area %  | Height % |
|-------|-----------|---------|--------|---------|----------|
| 1     | 11.936    | 4408380 | 240579 | 49.879  | 58.854   |
| 2     | 15.723    | 4429851 | 168193 | 50.121  | 41.146   |
| Total |           | 8838231 | 408772 | 100.000 | 100.000  |

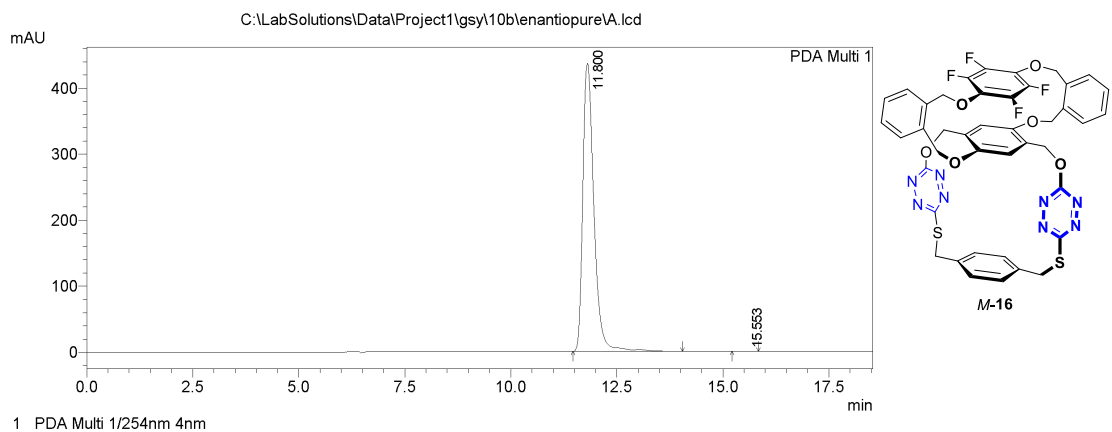

PeakTable

| Peak# | Ret. Time | Area    | Height | Area %  | Height % |
|-------|-----------|---------|--------|---------|----------|
| 1     | 11.800    | 7770324 | 436182 | 99.939  | 99.943   |
| 2     | 15.553    | 4718    | 251    | 0.061   | 0.057    |
| Total |           | 7775042 | 436433 | 100.000 | 100.000  |

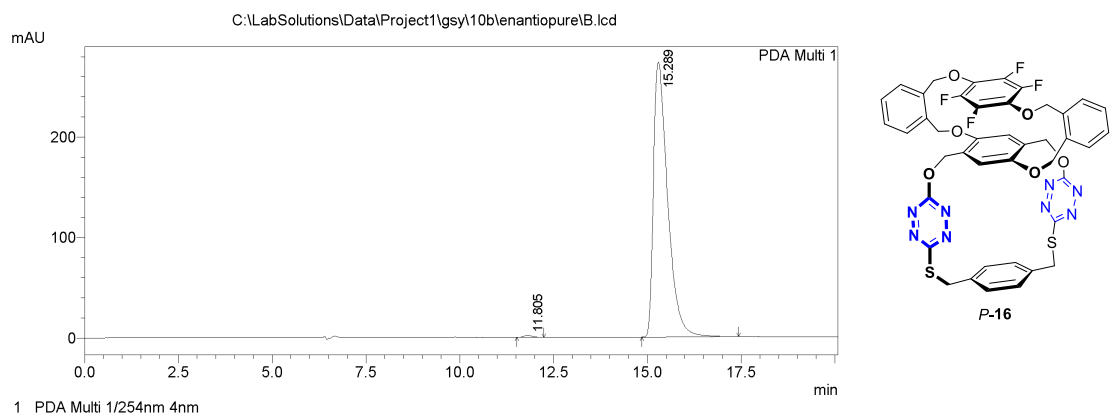

PeakTable

| Peak# | Ret. Time | Area    | Height | Area %  | Height % |
|-------|-----------|---------|--------|---------|----------|
| 1     | 11.805    | 33869   | 2012   | 0.470   | 0.730    |
| 2     | 15.289    | 7178965 | 273598 | 99.530  | 99.270   |
| Total |           | 7212834 | 275610 | 100.000 | 100.000  |

Figure S22. HPLC spectra of racemic, *M*-, and *P*-16

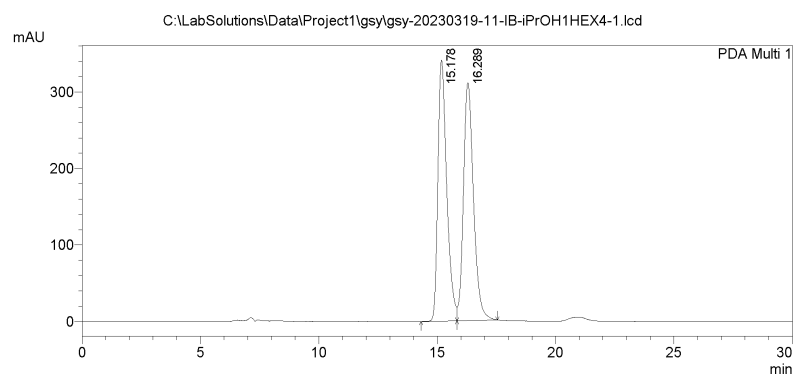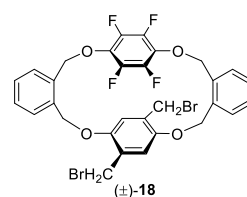

PeakTable

| Peak# | Ret. Time | Area     | Height | Area %  | Height % |
|-------|-----------|----------|--------|---------|----------|
| 1     | 15.178    | 8858471  | 340976 | 49.148  | 52.283   |
| 2     | 16.289    | 9165489  | 311201 | 50.852  | 47.717   |
| Total |           | 18023960 | 652176 | 100.000 | 100.000  |

**Figure S23. HPLC spectra of racemic 18**

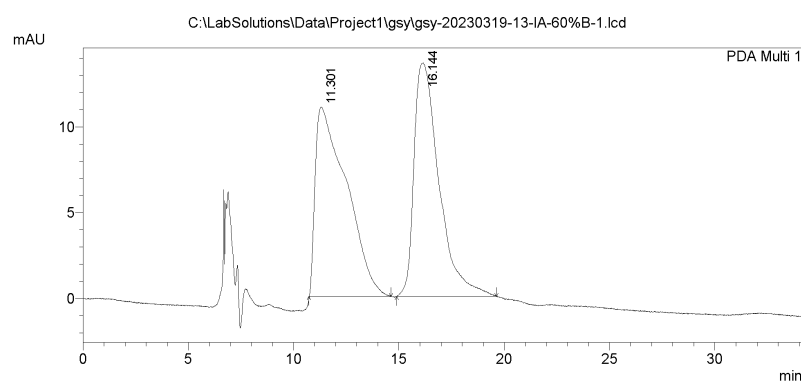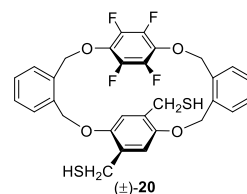

PeakTable

| Peak# | Ret. Time | Area    | Height | Area %  | Height % |
|-------|-----------|---------|--------|---------|----------|
| 1     | 11.301    | 1141642 | 11061  | 50.282  | 44.800   |
| 2     | 16.144    | 1128833 | 13629  | 49.718  | 55.200   |
| Total |           | 2270475 | 24690  | 100.000 | 100.000  |

**Figure S24. HPLC spectra of racemic 20**

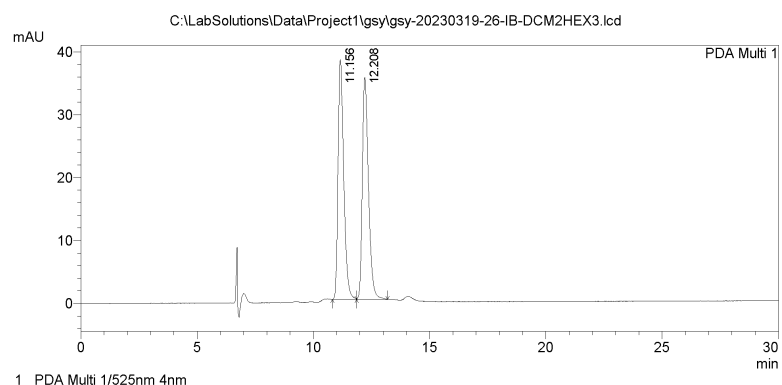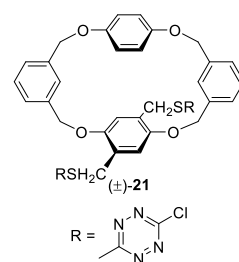

PeakTable

| Peak# | Ret. Time | Area    | Height | Area %  | Height % |
|-------|-----------|---------|--------|---------|----------|
| 1     | 11.156    | 650981  | 38123  | 50.014  | 51.916   |
| 2     | 12.208    | 650604  | 35309  | 49.986  | 48.084   |
| Total |           | 1301585 | 73432  | 100.000 | 100.000  |

**Figure S25. HPLC spectra of racemic 21**

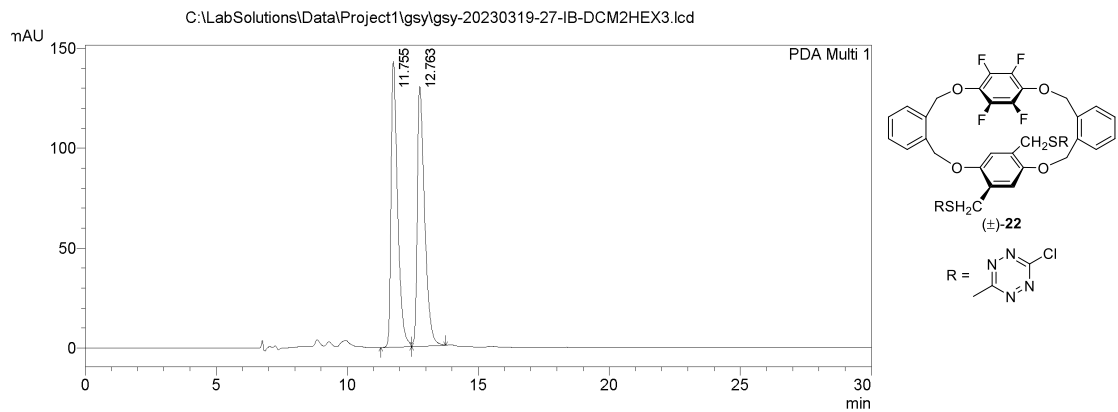

PeakTable

| Peak# | Ret. Time | Area    | Height | Area %  | Height % |
|-------|-----------|---------|--------|---------|----------|
| 1     | 11.755    | 2500298 | 143008 | 49.994  | 52.356   |
| 2     | 12.763    | 2500860 | 130139 | 50.006  | 47.644   |
| Total |           | 5001157 | 273147 | 100.000 | 100.000  |

**Figure S26. HPLC spectra of racemic 22**

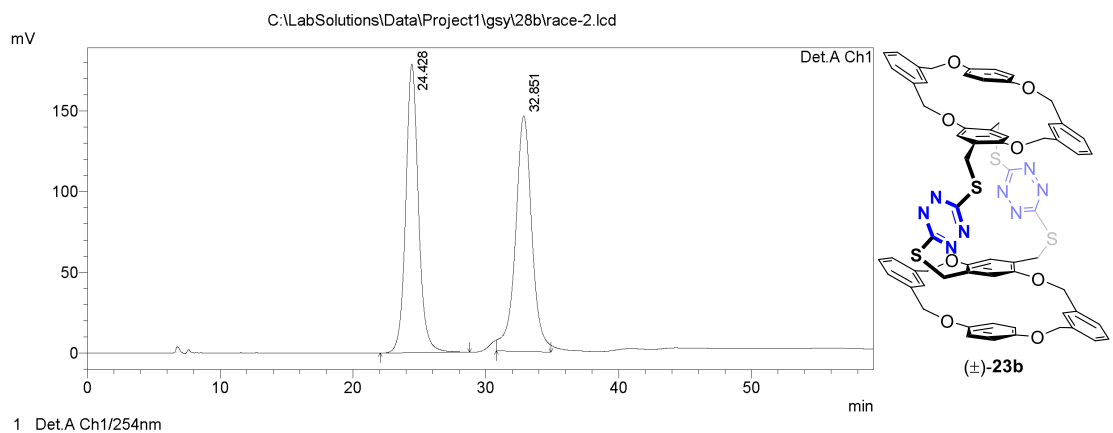

PeakTable

| Peak# | Ret. Time | Area     | Height | Area %  | Height % |
|-------|-----------|----------|--------|---------|----------|
| 1     | 24.428    | 11908107 | 178747 | 48.809  | 55.052   |
| 2     | 32.851    | 12489161 | 145940 | 51.191  | 44.948   |
| Total |           | 24397268 | 324687 | 100.000 | 100.000  |

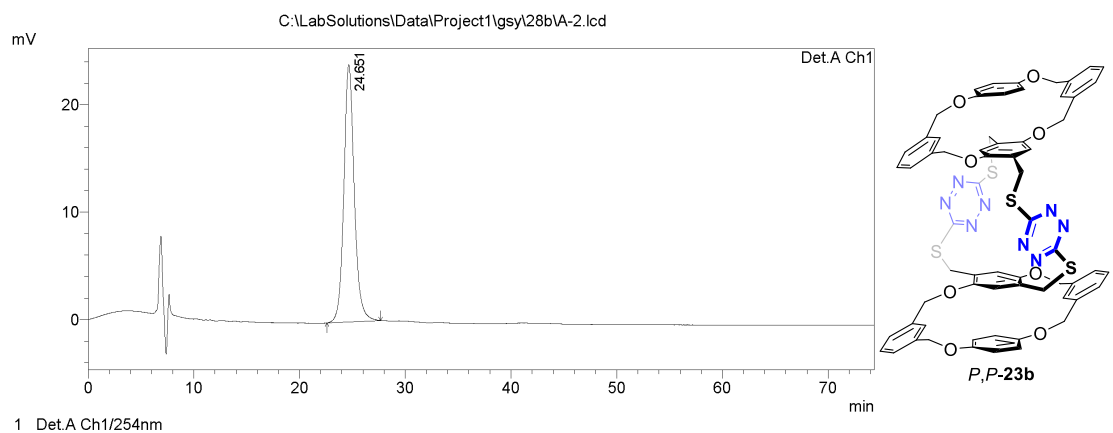

PeakTable

| Peak# | Ret. Time | Area    | Height | Area %  | Height % |
|-------|-----------|---------|--------|---------|----------|
| 1     | 24.651    | 1641249 | 23948  | 100.000 | 100.000  |
| Total |           | 1641249 | 23948  | 100.000 | 100.000  |

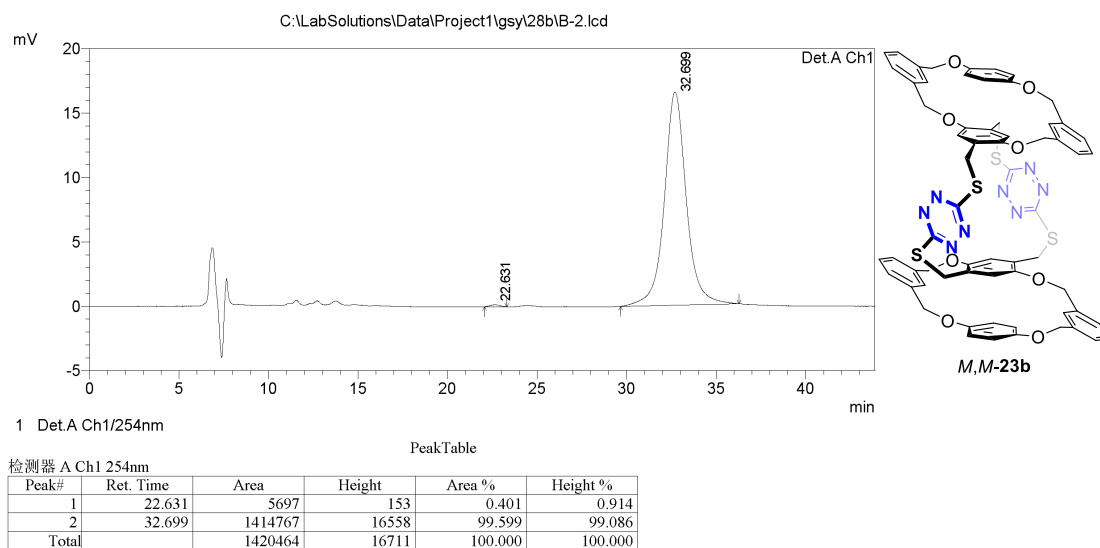

**Figure S27. HPLC spectra of racemic, *P,P*-, and *M,M*-23b**

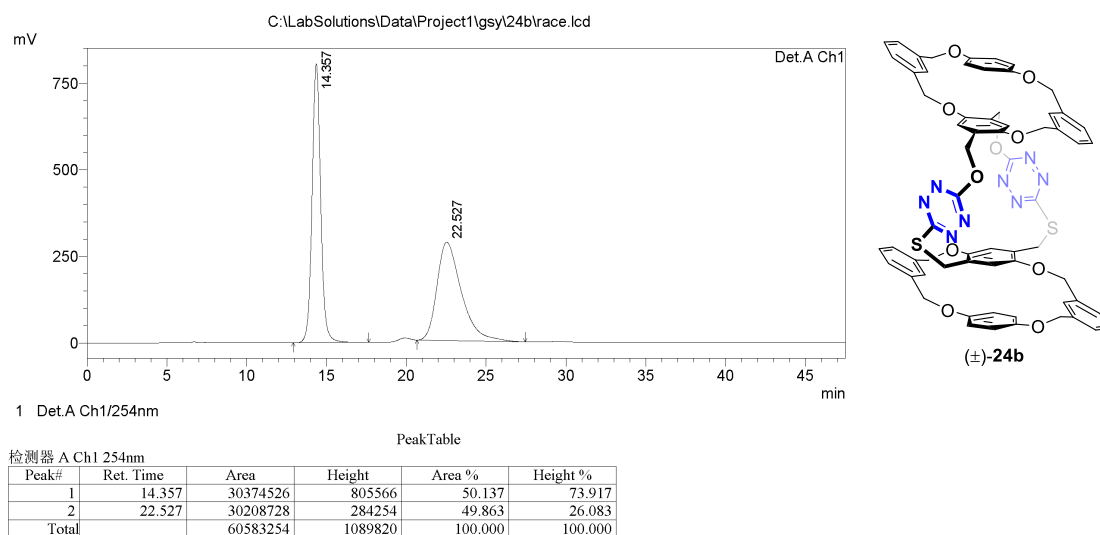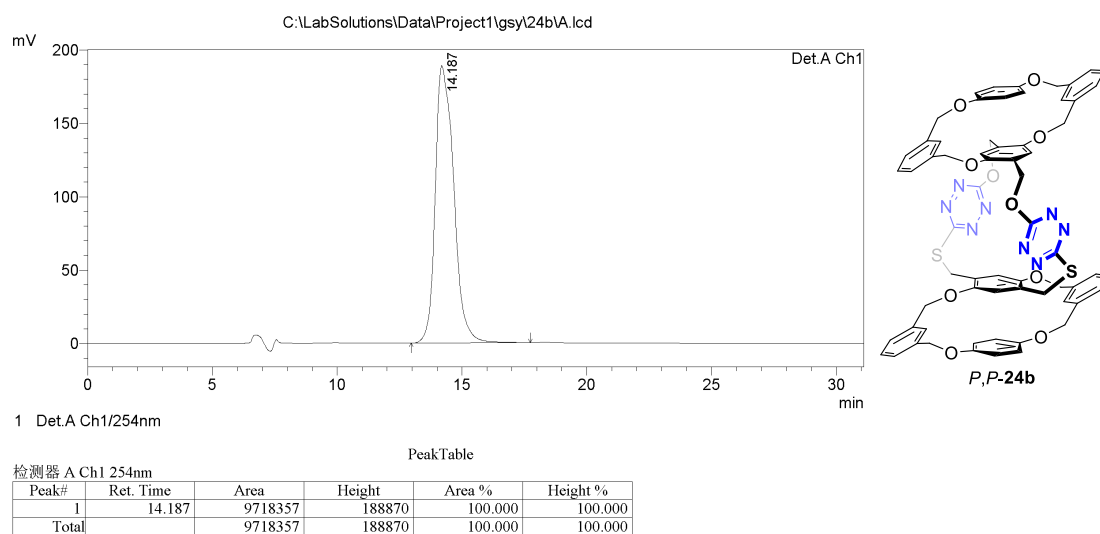

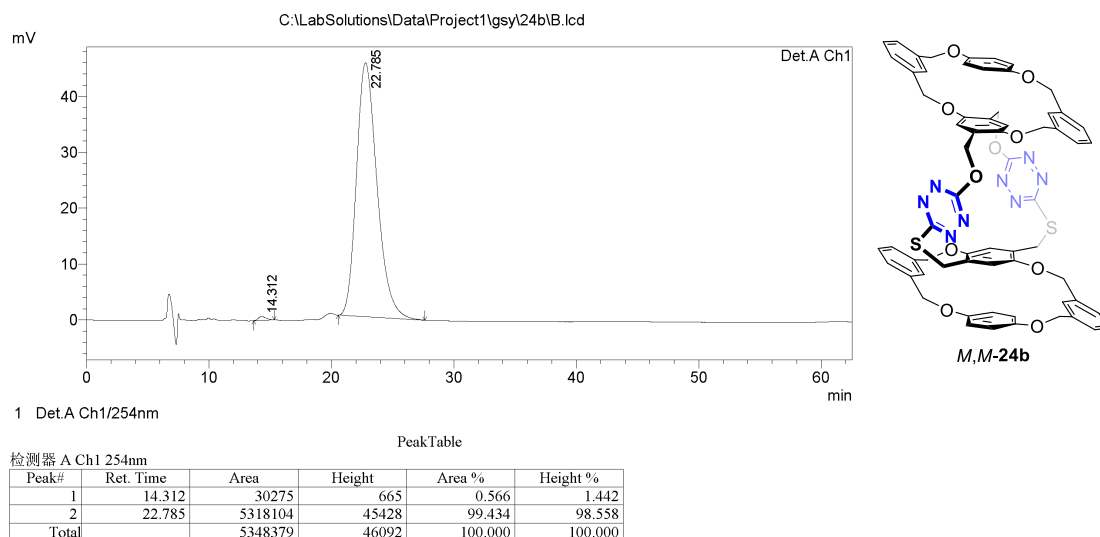

**Figure S28.** HPLC spectra of racemic, *P,P*-, and *M,M*-24b

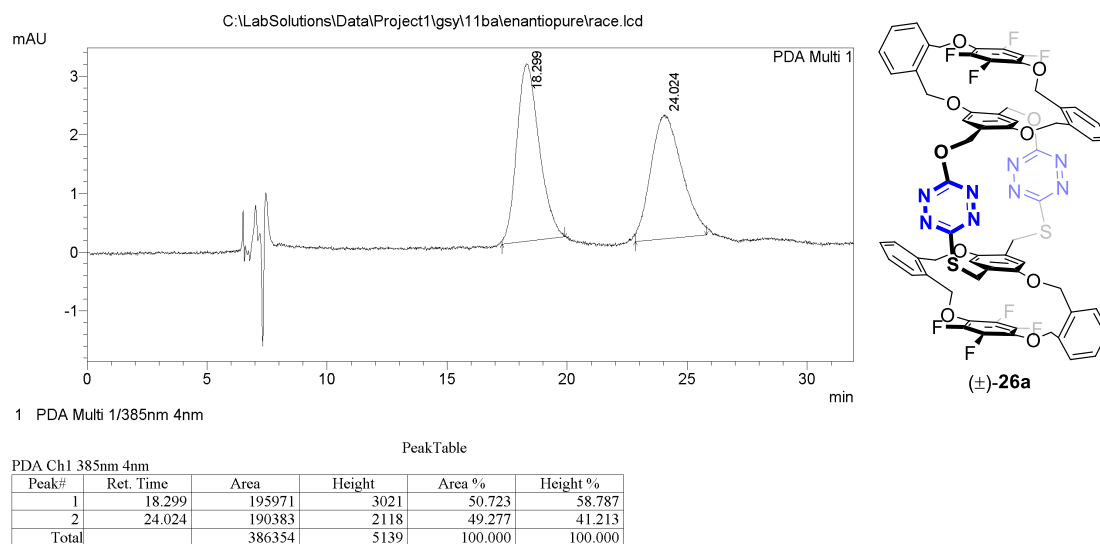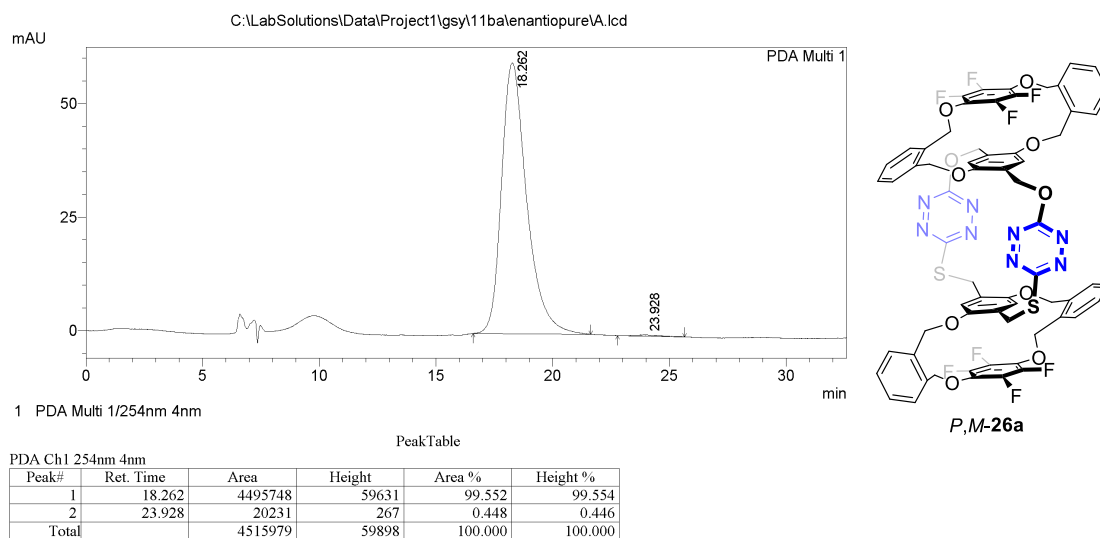

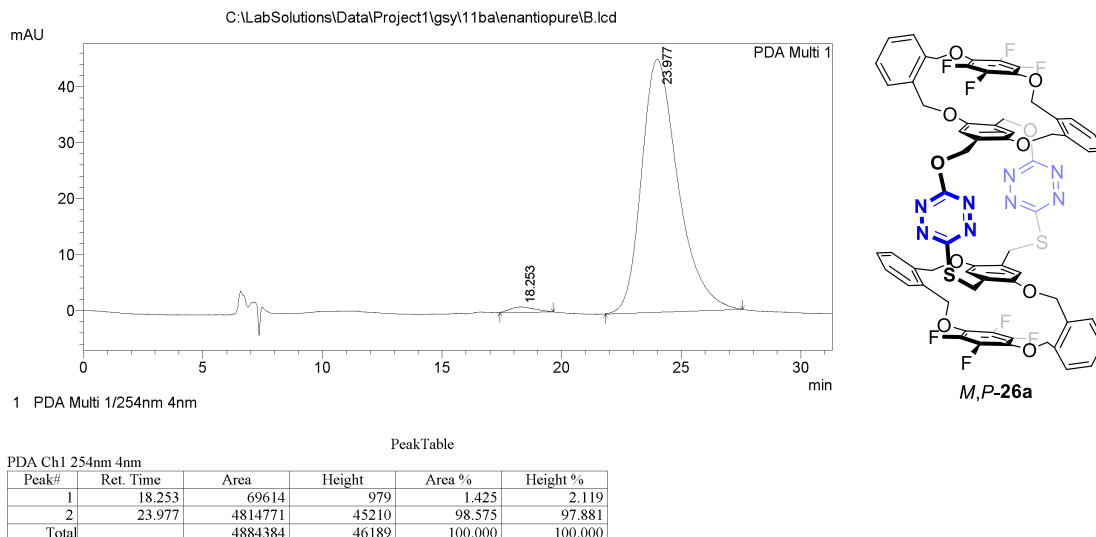

**Figure S29. HPLC spectra of racemic, *P,M*-, and *M,P*-26a**

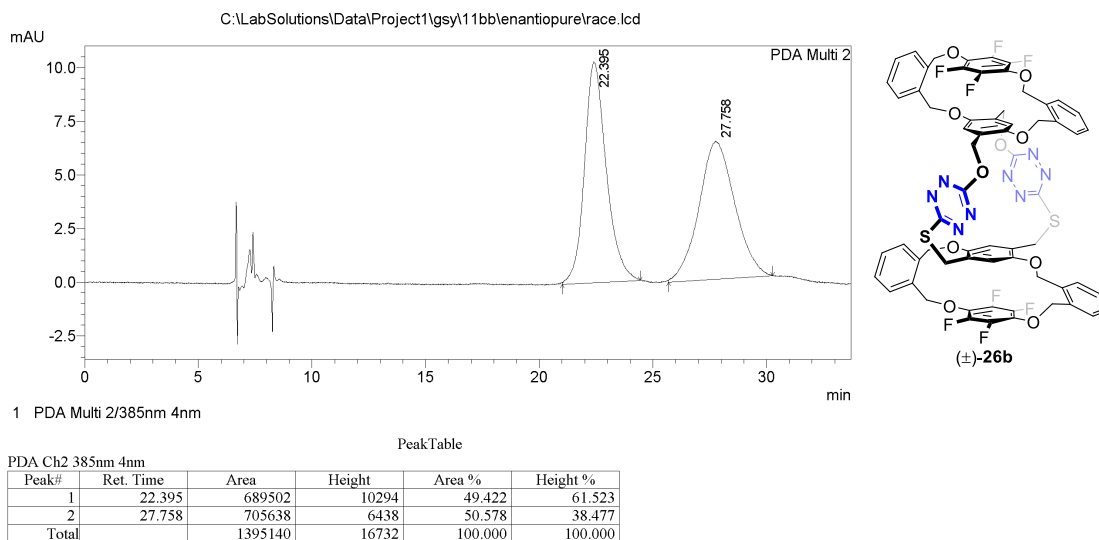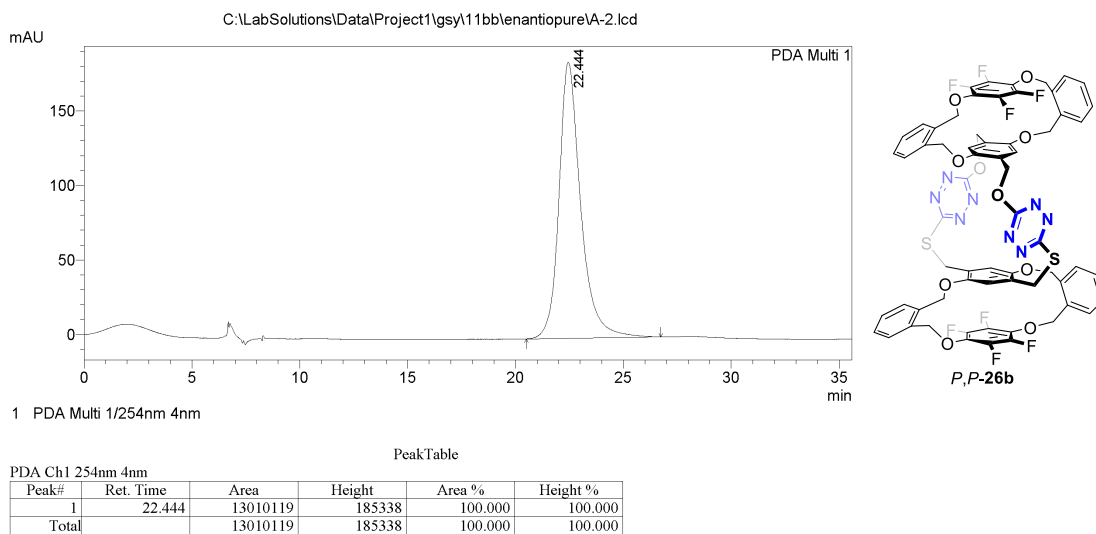

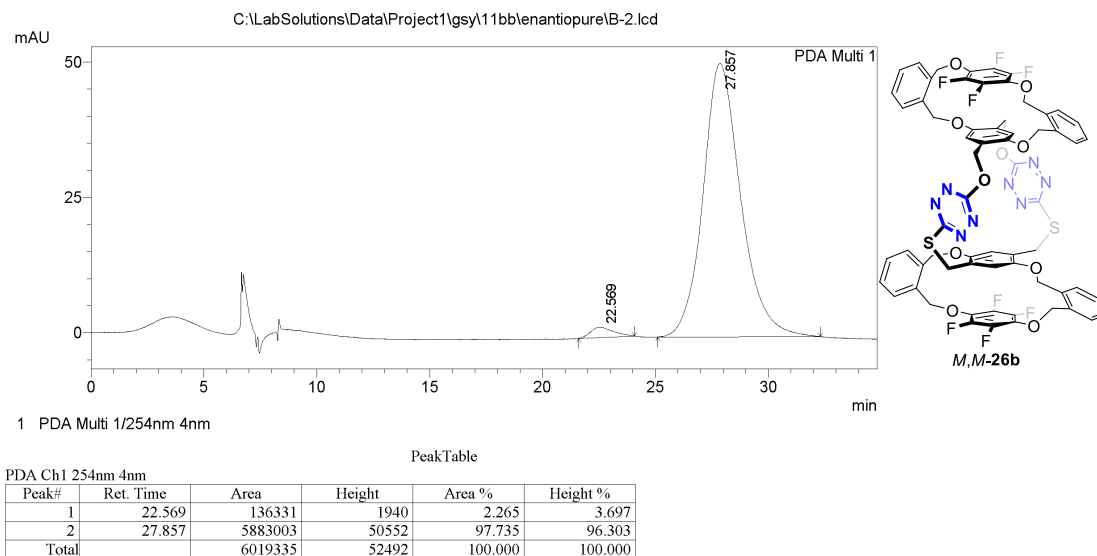

Figure S30. HPLC spectra of racemic, *P,P*-, and *M,M*-26b

## 5. Photophysical Data

### 5.1 UV-vis and fluorescence spectra

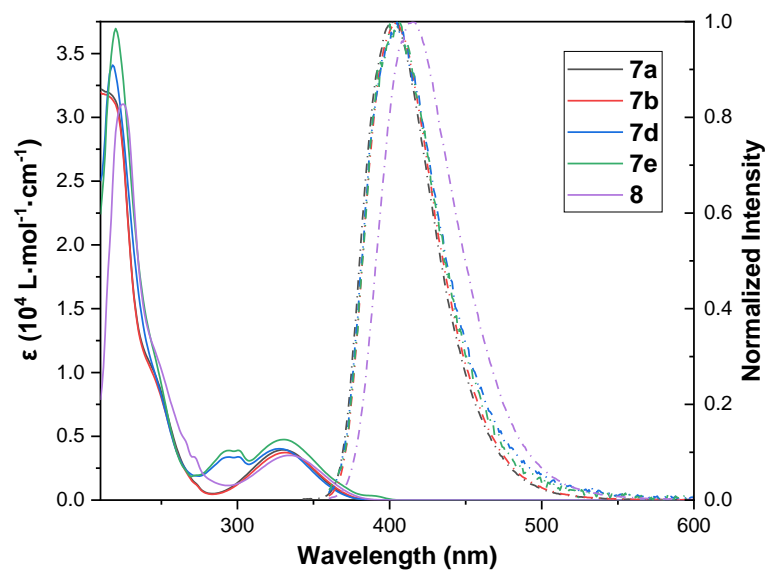

Figure S31. UV-vis spectra ( $1 \times 10^{-4}$  M) and normalized fluorescence spectra ( $1.0 \times 10^{-5}$  M) of **7a**, **7b**, **7d**, **7e**, and **8** in acetonitrile at 22 °C.



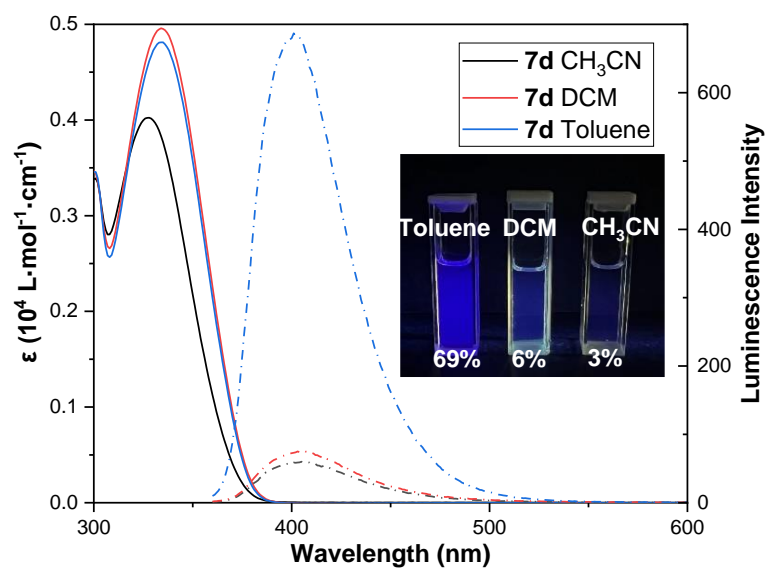

**Figure S32.** UV-vis ( $1 \times 10^{-4}$  M) and fluorescence spectra ( $1.0 \times 10^{-5}$  M) of **7d** in acetonitrile, dichloromethane, and toluene at 22 °C. The inset shows the fluorescence of **7d** ( $1.0 \times 10^{-8}$  M) under the irradiation of UV light (365 nm).

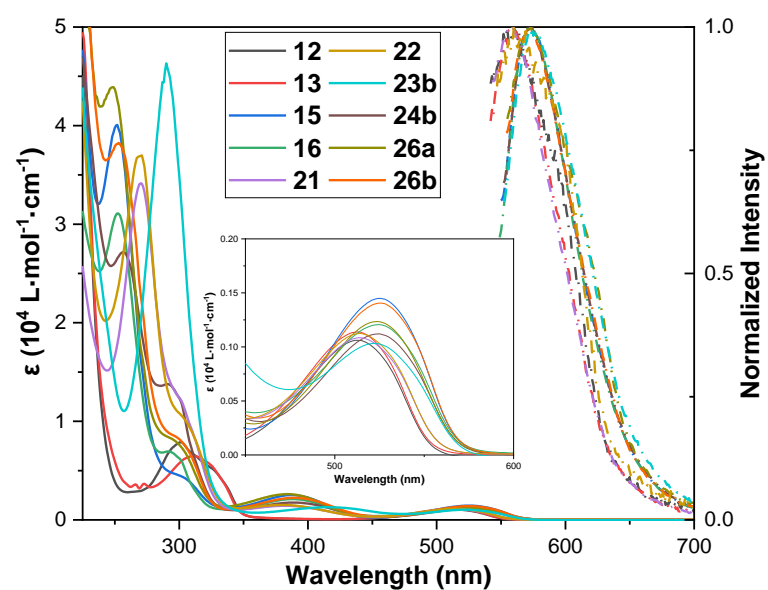

**Figure S33.** UV-vis spectra ( $1 \times 10^{-4}$  M) and normalized fluorescence spectra ( $1.0 \times 10^{-4}$  M) of **12**, **13**, **15**, **16**, **21-24**, and **26** in acetonitrile at 22 °C.

**Table S14.** Data of UV-vis and fluorescence spectra

| Compound | Solv.              | $\lambda_{\max}$ (nm)                                                        | $\lambda_{\text{ex}}$ (nm) | $\lambda_{\text{em}}$ (nm) | $\phi$         |
|----------|--------------------|------------------------------------------------------------------------------|----------------------------|----------------------------|----------------|
|          |                    | ( $\epsilon, \times 10^4 \text{ L}\cdot\text{mol}^{-1}\cdot\text{cm}^{-1}$ ) |                            |                            |                |
| 7a       | Toluene            | 333 (0.42)                                                                   | 335                        | 402                        | 67.3%          |
| 7a       | DCM                | 335 (0.42), 249 (1.02)                                                       | 335                        | 402                        | 64.1%          |
| 7a       | CH <sub>3</sub> CN | 330 (0.39), 243 (1.06), 216 (3.19)                                           | 335                        | 403                        | 64.5%          |
| 7b       | Toluene            | 337 (0.41)                                                                   | 340                        | 402                        | 65.8%          |
| 7b       | DCM                | 337 (0.42), 248 (1.04)                                                       | 338                        | 403                        | 61.3%          |
| 7b       | CH <sub>3</sub> CN | 331 (0.37), 244 (1.00), 215 (3.17)                                           | 335                        | 405                        | 69.9%          |
| 7d       | Toluene            | 334 (0.48), 300 (0.35), 293 (0.36)                                           | 337                        | 402                        | 69.4%          |
| 7d       | DCM                | 334 (0.50), 300 (0.35), 292 (0.36)                                           | 332                        | 406                        | 5.7%           |
| 7d       | CH <sub>3</sub> CN | 328 (0.40), 301 (0.34), 294 (0.34), 218 (3.41)                               | 330                        | 405                        | 3.1%           |
| 7e       | Toluene            | 337 (0.57), 300 (0.39), 294 (0.41)                                           | 340                        | 403                        | 61.6%          |
| 7e       | DCM                | 337 (0.57), 300 (0.38), 293 (0.40)                                           | 337                        | 410                        | 2.2%           |
| 7e       | CH <sub>3</sub> CN | 330 (0.47), 301 (0.39), 294 (0.39), 220 (3.70)                               | 333                        | 407                        | 1.5%           |
| 8        | Toluene            | 335 (0.38)                                                                   | 336                        | 414                        | 61.5%          |
| 8        | DCM                | 337 (0.40), 273 (0.40), 232 (2.39)                                           | 337                        | 413                        | 55.0%          |
| 8        | CH <sub>3</sub> CN | 334 (0.35), 272 (0.34), 266 (0.46), 225 (3.10)                               | 335                        | 415                        | 57.8%          |
| 12       | Toluene            | 522 (0.15), 330 (0.47), 299 (0.96)                                           | 530                        | 568                        | - <sup>a</sup> |
| 12       | DCM                | 522 (0.13), 338 (0.70), 325 (0.98)                                           | 524                        | 563                        | - <sup>a</sup> |
| 12       | CH <sub>3</sub> CN | 513 (0.11), 327 (0.51), 301 (0.79), 221 (4.90)                               | 514                        | 560                        | - <sup>a</sup> |
| 13       | Toluene            | 522 (0.15), 307 (0.69)                                                       | 527                        | 567                        | - <sup>a</sup> |
| 13       | DCM                | 521 (0.14), 313 (0.73), 273 (0.43), 267 (0.44)                               | 528                        | 566                        | - <sup>a</sup> |
| 13       | CH <sub>3</sub> CN | 513 (0.11), 311 (0.65), 273 (0.37), 266 (0.36), 224 (5.09)                   | 515                        | 558                        | - <sup>a</sup> |
| 15       | Toluene            | 532 (0.14), 389 (0.22), 293 (0.86)                                           | 535                        | 576                        | 1.7%           |
| 15       | DCM                | 530 (0.13), 392 (0.22), 292 (0.73), 255 (3.11)                               | 531                        | 575                        | - <sup>a</sup> |

**Table S14.** Data of UV-vis and fluorescence spectra

|            |                    |                                                                        |     |     |                |
|------------|--------------------|------------------------------------------------------------------------|-----|-----|----------------|
| <b>15</b>  | CH <sub>3</sub> CN | 524 (0.12), 387 (0.21), 291 (0.69), 252 (3.11)                         | 528 | 573 | - <sup>a</sup> |
| <b>16</b>  | Toluene            | 532 (0.17), 389 (0.25), 300 (0.56)                                     | 537 | 574 | 1.8%           |
| <b>16</b>  | DCM                | 530 (0.16), 392 (0.26), 305 (0.46), 254 (4.03)                         | 531 | 575 | - <sup>a</sup> |
| <b>16</b>  | CH <sub>3</sub> CN | 525 (0.15), 388 (0.25), 304 (0.43), 252 (4.00), 220 (5.22)             | 525 | 571 | - <sup>a</sup> |
| <b>21</b>  | Toluene            | 524 (0.15), 385 (0.14), 300 (1.47)                                     | 533 | 570 | - <sup>a</sup> |
| <b>21</b>  | DCM                | 524 (0.12), 391 (0.14), 307 (1.11), 274 (3.32)                         | 519 | 571 | - <sup>a</sup> |
| <b>21</b>  | CH <sub>3</sub> CN | 514 (0.11), 382 (0.14), 302 (1.20), 270 (3.42)                         | 513 | 558 | - <sup>a</sup> |
| <b>22</b>  | Toluene            | 523 (0.14), 387 (0.14), 308 (1.03)                                     | 529 | 570 | - <sup>a</sup> |
| <b>22</b>  | DCM                | 523 (0.13), 386 (0.16), 309 (1.04), 272 (3.88)                         | 519 | 575 | - <sup>a</sup> |
| <b>22</b>  | CH <sub>3</sub> CN | 514 (0.11), 380 (0.15), 304 (1.02), 271 (3.70), 224 (5.03)             | 518 | 563 | - <sup>a</sup> |
| <b>23b</b> | Toluene            | 532 (0.12), 411 (0.15)                                                 | 533 | 582 | - <sup>a</sup> |
| <b>23b</b> | DCM                | 529 (0.11), 415 (0.14), 292 (4.45)                                     | 529 | 580 | - <sup>a</sup> |
| <b>23b</b> | CH <sub>3</sub> CN | 523 (0.10), 416 (0.13), 290 (4.63)                                     | 524 | 573 | - <sup>a</sup> |
| <b>24b</b> | Toluene            | 533 (0.14), 389 (0.20), 301 (1.52), 290 (1.73)                         | 524 | 578 | - <sup>a</sup> |
| <b>24b</b> | DCM                | 530 (0.11), 392 (0.18), 301 (1.23), 290 (1.44), 257 (2.06)             | 513 | 565 | - <sup>a</sup> |
| <b>24b</b> | CH <sub>3</sub> CN | 525 (0.11), 389 (0.18), 301 (1.20), 391 (1.38), 257 (2.72), 219 (5.10) | 525 | 572 | - <sup>a</sup> |
| <b>26a</b> | Toluene            | 532 (0.15), 389 (0.26), 296 (0.99)                                     | 535 | 576 | - <sup>a</sup> |
| <b>26a</b> | DCM                | 528 (0.15), 389 (0.28), 307 (0.76), 252 (4.25)                         | 525 | 576 | - <sup>a</sup> |
| <b>26a</b> | CH <sub>3</sub> CN | 524 (0.12), 384 (0.26), 304 (0.70), 249 (4.39), 221 (5.21)             | 527 | 573 | - <sup>a</sup> |
| <b>26b</b> | Toluene            | 532 (0.18), 389 (0.26), 303 (1.02)                                     | 535 | 574 | - <sup>a</sup> |
| <b>26b</b> | DCM                | 530 (0.15), 392 (0.24), 307 (0.74), 254 (3.81)                         | 526 | 574 | - <sup>a</sup> |
| <b>26b</b> | CH <sub>3</sub> CN | 526 (0.14), 390 (0.22), 302 (0.79), 253 (3.82), 221 (5.32)             | 526 | 572 | - <sup>a</sup> |

<sup>a</sup> Fluorescence was too weak to calculate the quantum yield.

## 5.2 CD and CPL spectra

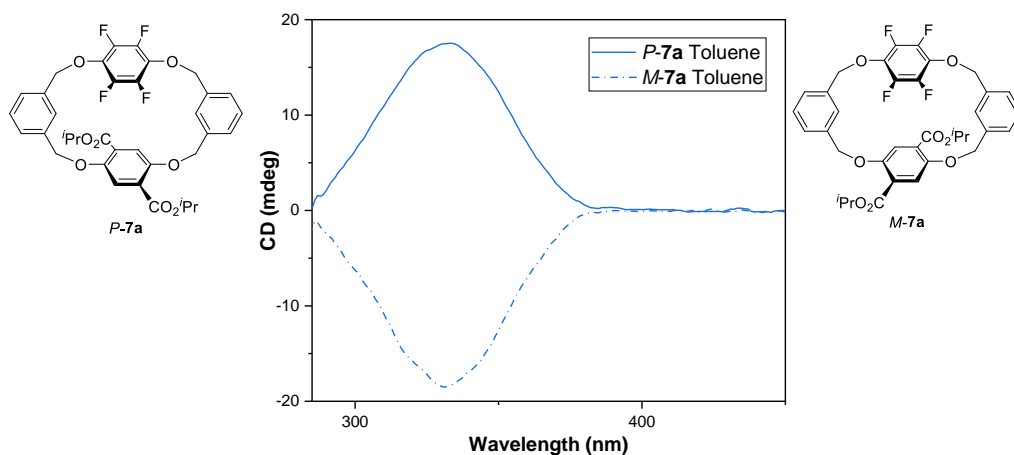

Figure S34A. CD spectra of *P-7a* and *M-7a* in toluene at 25 °C (ca.  $5 \times 10^{-5}$  M)

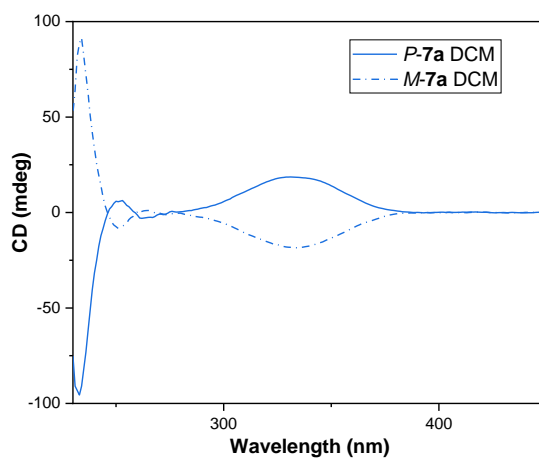

Figure S34B. CD spectra of *P-7a* and *M-7a* in dichloromethane at 25 °C (ca.  $6 \times 10^{-5}$  M)

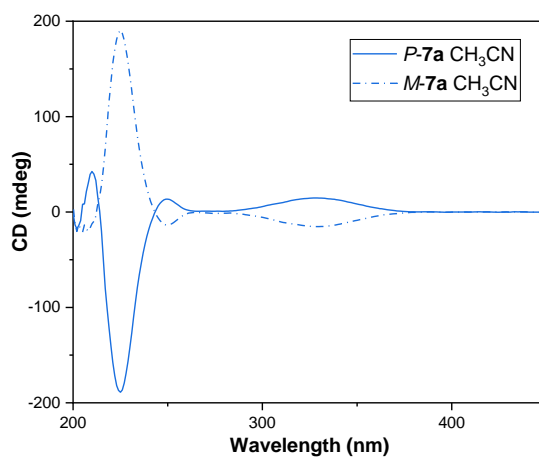

Figure S34C. CD spectra of *P-7a* and *M-7a* in acetonitrile at 25 °C (ca.  $5 \times 10^{-5}$  M)

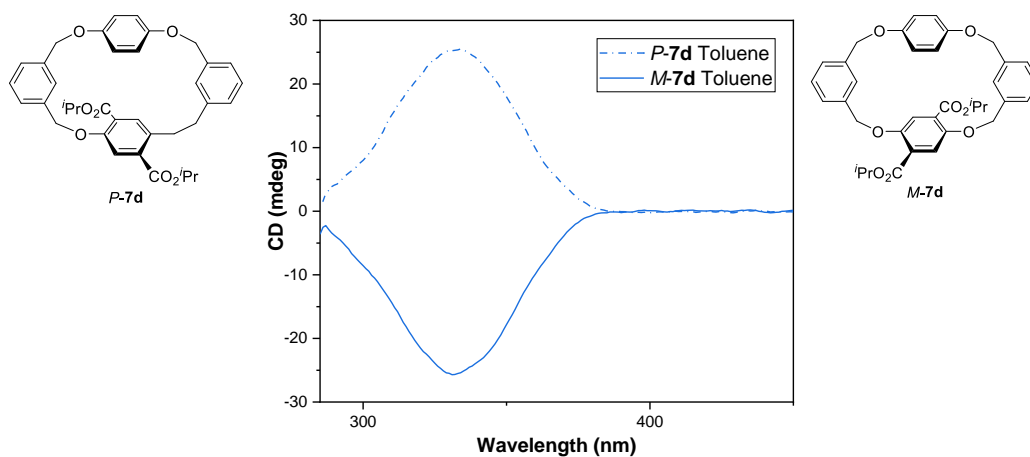

**Figure S34D.** CD spectra of *P-7d* and *M-7d* in toluene at 25 °C (ca.  $7 \times 10^{-5}$  M)

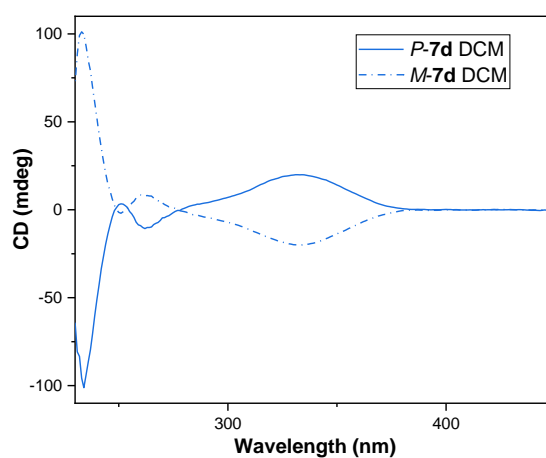

**Figure S34E.** CD spectra of *P-7d* and *M-7d* in dichloromethane at 25 °C (ca.  $5 \times 10^{-5}$  M)

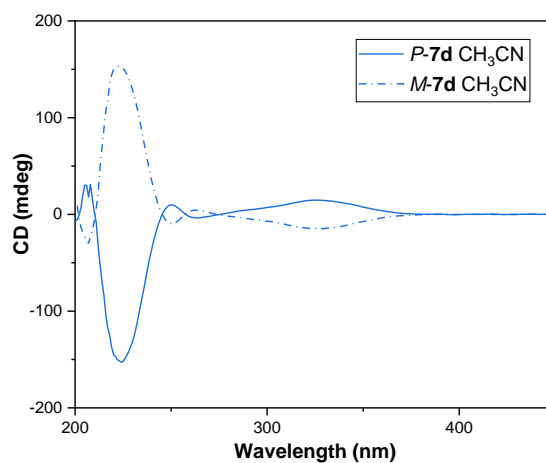

**Figure S34F.** CD spectra of *P-7d* and *M-7d* in acetonitrile at 25 °C (ca.  $5 \times 10^{-5}$  M)

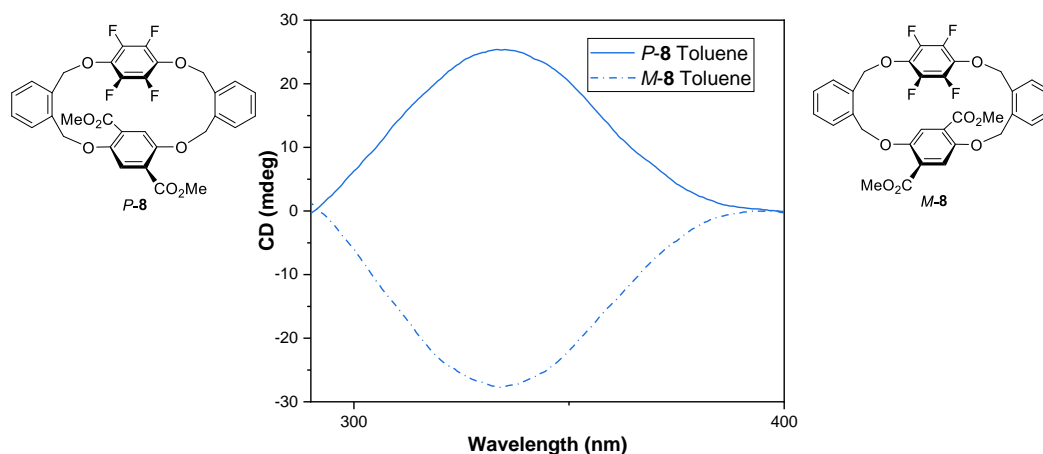

**Figure S34G.** CD spectra of *P-8* and *M-8* in toluene at 25 °C (ca.  $1.0 \times 10^{-4}$  M)

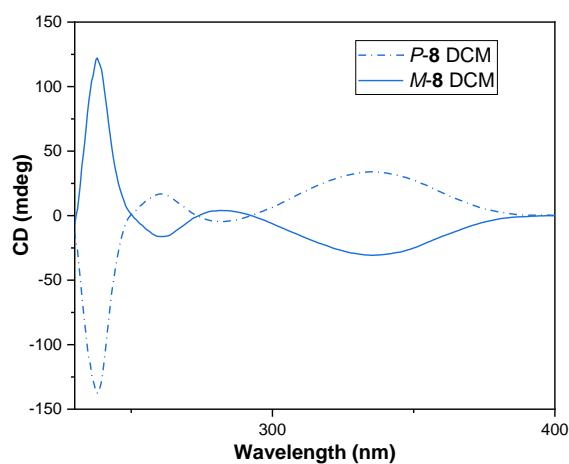

**Figure S34H.** CD spectra of *P-8* and *M-8* in dichloromethane at 25 °C (ca.  $1.2 \times 10^{-4}$  M)

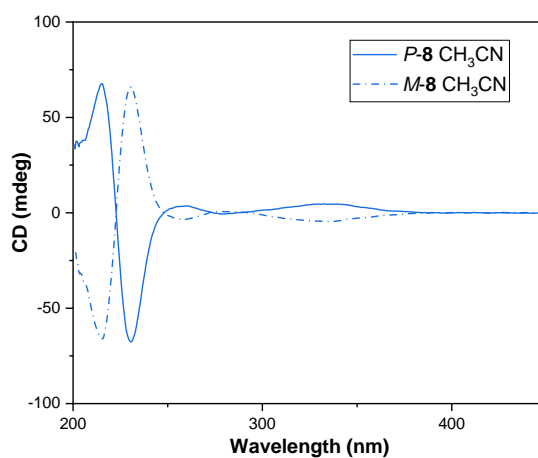

**Figure S34I.** CD spectra of *P-8* and *M-8* in acetonitrile at 25 °C (ca.  $3 \times 10^{-5}$  M)

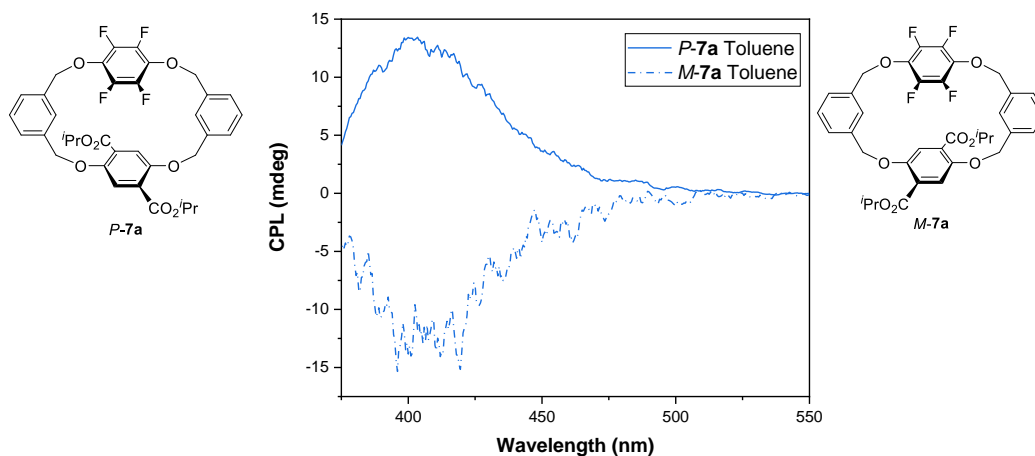

**Figure S35A.** CPL spectra of *P-7a* and *M-7a* in toluene at 25 °C (ca.  $1 \times 10^{-4}$  M)

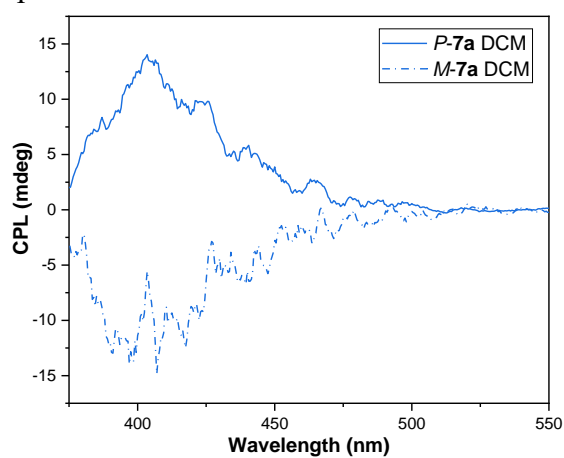

**Figure S35B.** CPL spectra of *P-7a* and *M-7a* in dichloromethane at 25 °C (ca.  $1 \times 10^{-4}$  M)

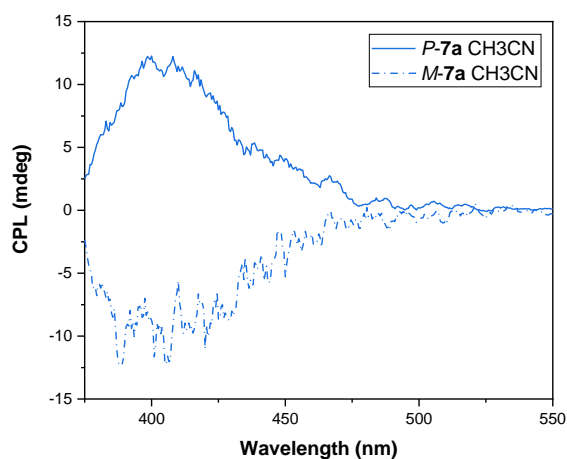

**Figure S35C.** CPL spectra of *P-7a* and *M-7a* in acetonitrile at 25 °C (ca.  $1 \times 10^{-4}$  M)

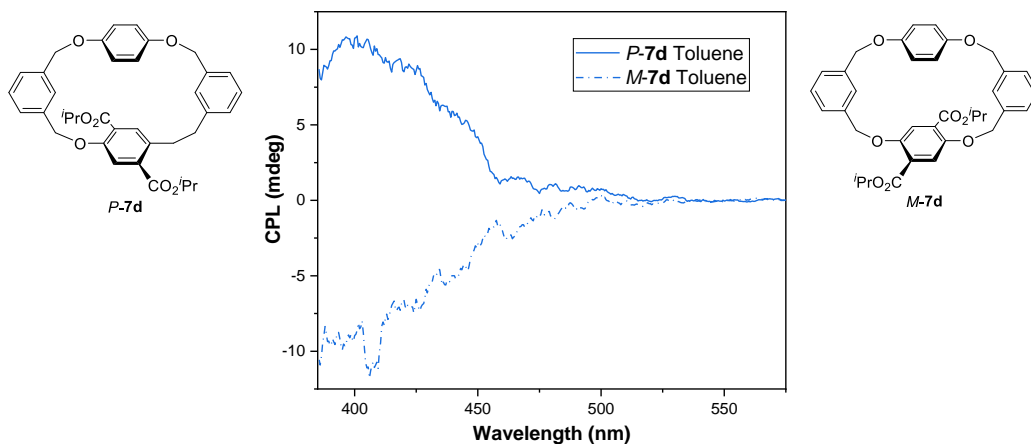

**Figure S35D.** CPL spectra of *P-7d* and *M-7d* in toluene at 25 °C (ca.  $1 \times 10^{-4}$  M)

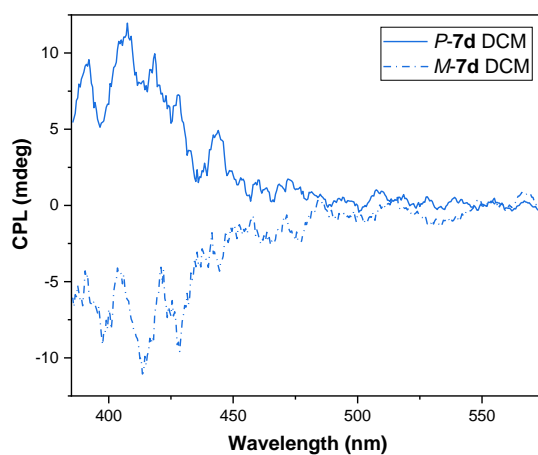

**Figure S35E.** CPL spectra of *P-7d* and *M-7d* in dichloromethane at 25 °C (ca.  $1 \times 10^{-4}$  M)

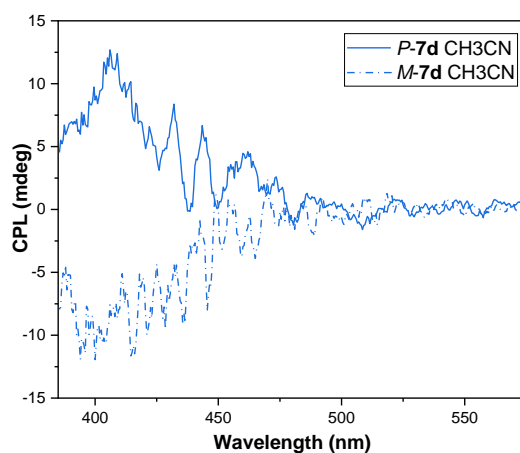

**Figure S35F.** CPL spectra of *P-7d* and *M-7d* in acetonitrile at 25 °C (ca.  $1 \times 10^{-4}$  M)



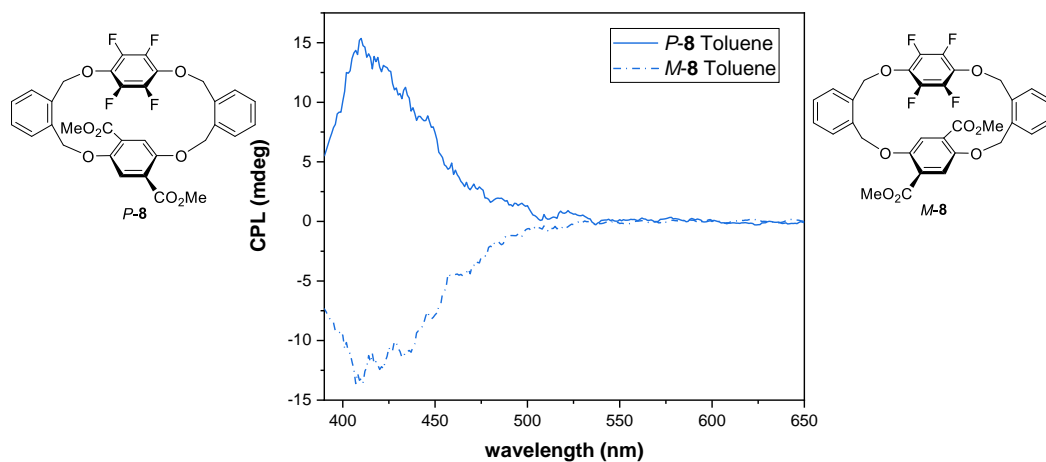

**Figure S35G.** CPL spectra of *P-8* and *M-8* in toluene at 25 °C (ca.  $1 \times 10^{-4}$  M)

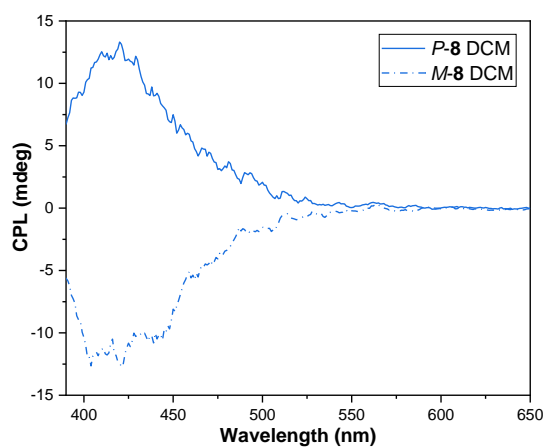

**Figure S35H.** CPL spectra of *P-8* and *M-8* in chloromethane at 25 °C (ca.  $1 \times 10^{-4}$  M)

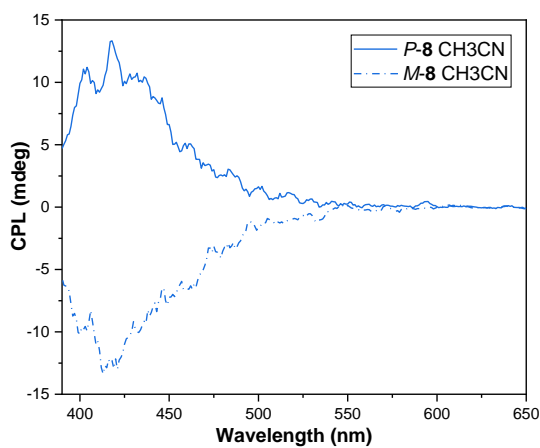

**Figure S35I.** CPL spectra of *P-8* and *M-8* in acetonitrile at 25 °C (ca.  $1 \times 10^{-4}$  M)

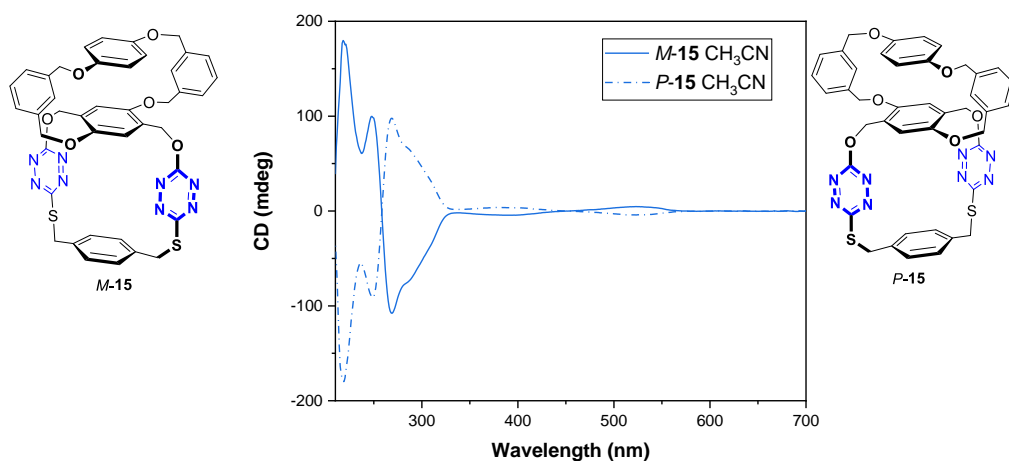

**Figure S36A.** CD spectra of *M-15* and *P-15* in acetonitrile at 25 °C (ca.  $8 \times 10^{-5}$  M)

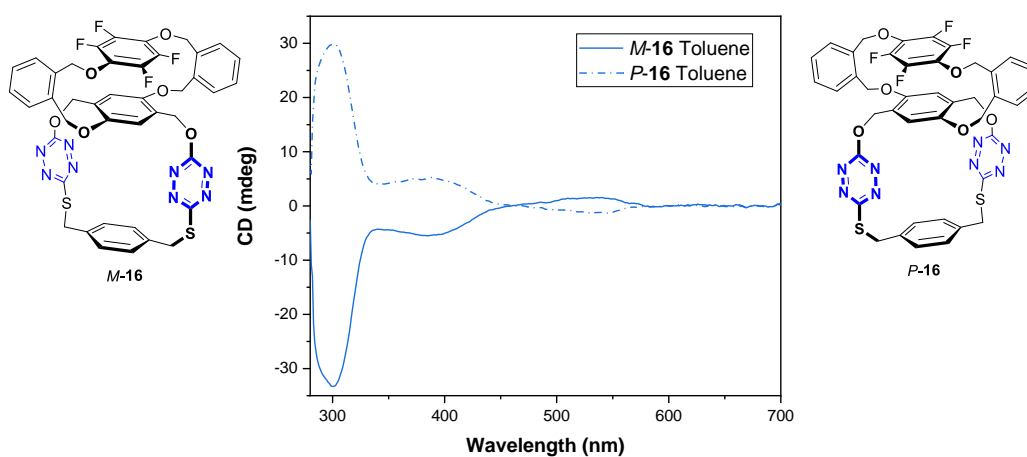

**Figure S36B.** CD spectra of *M-16* and *P-16* in toluene at 25 °C (ca.  $6 \times 10^{-5}$  M)

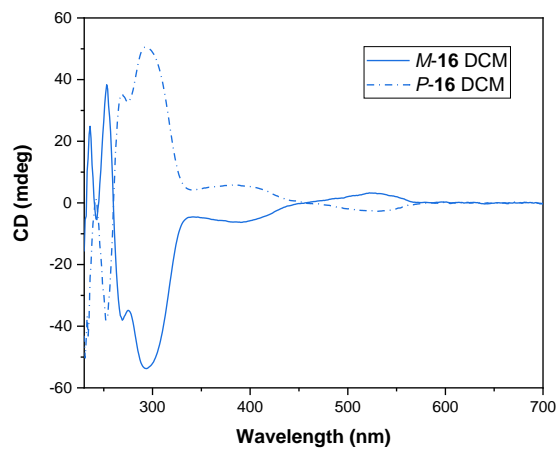

**Figure S36C.** CD spectra of *M-16* and *P-16* in chloromethane at 25 °C (ca.  $8 \times 10^{-5}$  M)

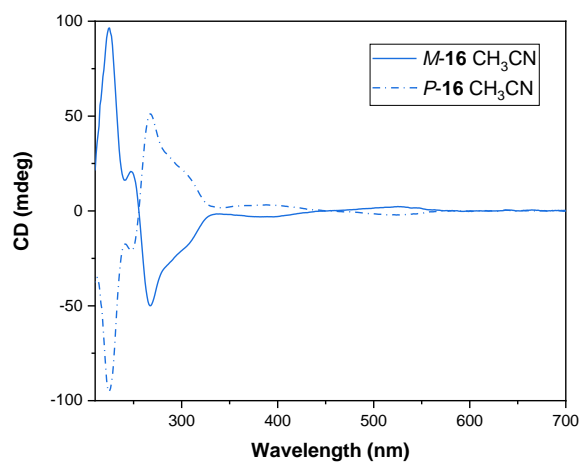

**Figure S36D.** CD spectra of *M*-16 and *P*-16 in acetonitrile at 25 °C (ca.  $4 \times 10^{-5}$  M)

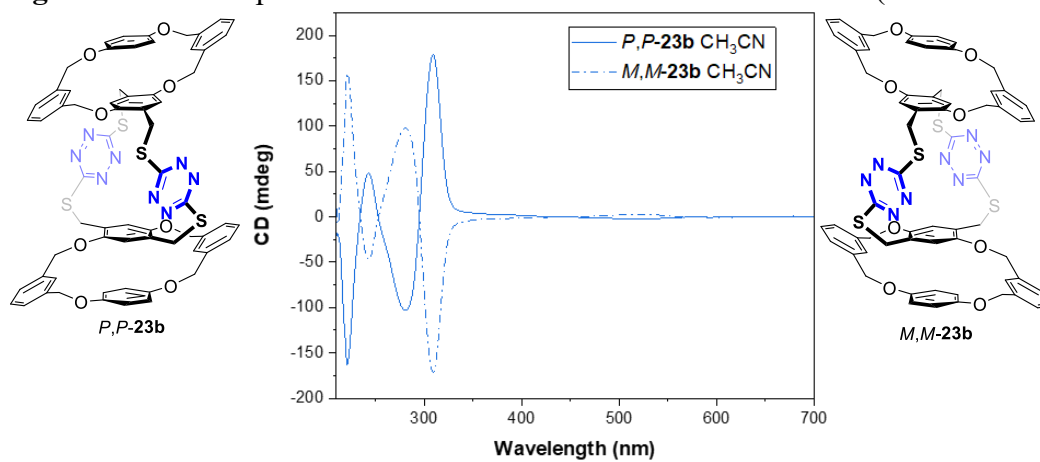

**Figure S36E.** CD spectra of *P,P*-23b and *M,M*-23b in acetonitrile at 25 °C (ca.  $4 \times 10^{-5}$  M)

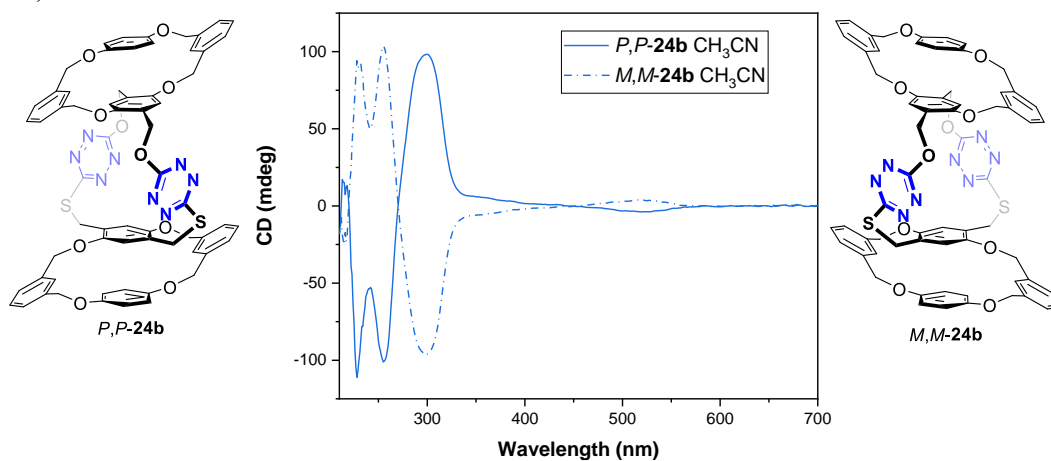

**Figure S36F.** CD spectra of *P,P*-24b and *M,M*-24b in acetonitrile at 25 °C (ca.  $9 \times 10^{-5}$  M)

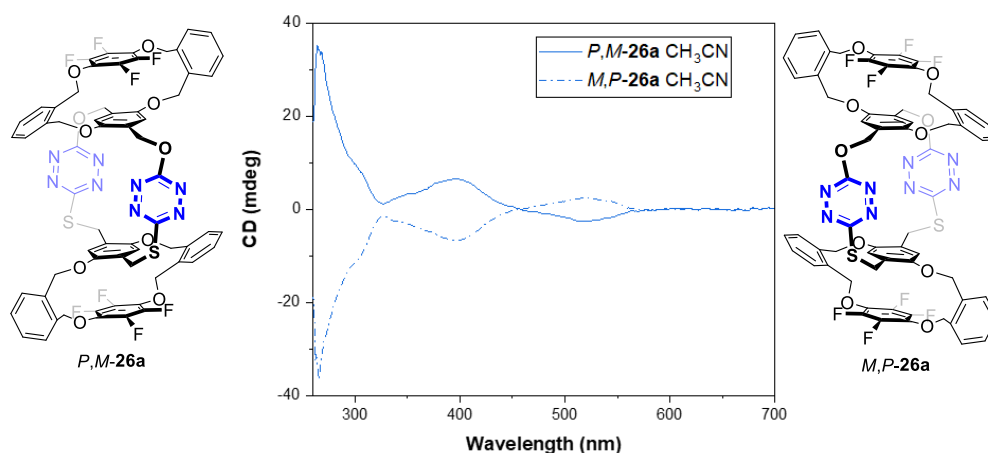

**Figure S36G.** CD spectra of *P,M-26a* and *M,P-26a* in acetonitrile at 25 °C (ca.  $2 \times 10^{-5}$  M)

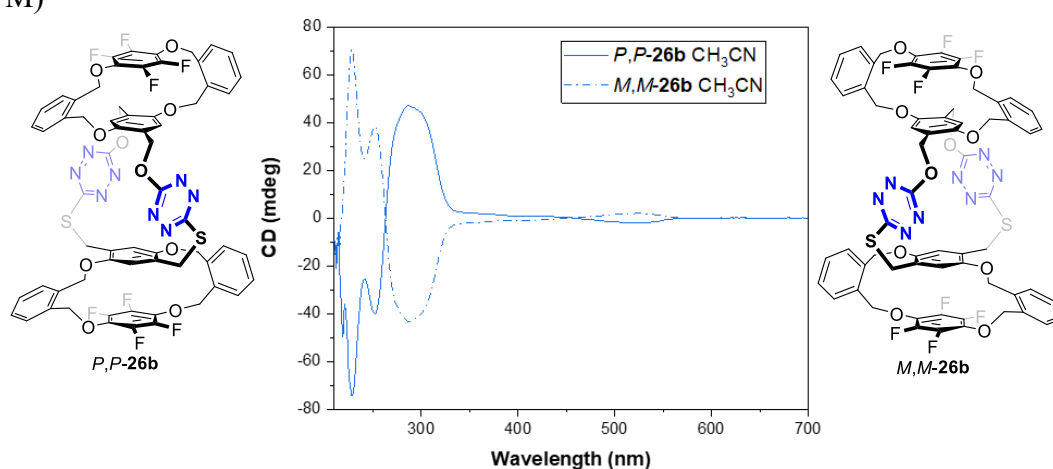

**Figure S36H.** CD spectra of *P,P-26b* and *M,M-26b* in acetonitrile at 25 °C (ca.  $5 \times 10^{-5}$  M)

**Table S15.** Data of CD and CPL spectra

| Compound    | Solv.              | CD $g_{abs}$                   | CPL $g_{lum}$                  |
|-------------|--------------------|--------------------------------|--------------------------------|
| <i>P-7a</i> | Toluene            | $2.5 \times 10^{-3}$ (333 nm)  | $1.9 \times 10^{-3}$ (403 nm)  |
| <i>M-7a</i> | Toluene            | $-2.6 \times 10^{-3}$ (331 nm) | $-2.0 \times 10^{-3}$ (401 nm) |
| <i>P-7a</i> | DCM                | $2.3 \times 10^{-3}$ (331 nm)  | $2.0 \times 10^{-3}$ (404 nm)  |
| <i>M-7a</i> | DCM                | $-2.4 \times 10^{-3}$ (334 nm) | $-2.1 \times 10^{-3}$ (407 nm) |
| <i>P-7a</i> | CH <sub>3</sub> CN | $2.3 \times 10^{-3}$ (327 nm)  | $1.7 \times 10^{-3}$ (408 nm)  |
| <i>M-7a</i> | CH <sub>3</sub> CN | $-2.3 \times 10^{-3}$ (329 nm) | $-1.7 \times 10^{-3}$ (406 nm) |
| <i>P-7d</i> | Toluene            | $2.2 \times 10^{-3}$ (334 nm)  | $1.5 \times 10^{-3}$ (401 nm)  |
| <i>M-7d</i> | Toluene            | $-2.3 \times 10^{-3}$ (331 nm) | $-1.6 \times 10^{-3}$ (406 nm) |
| <i>P-7d</i> | DCM                | $2.2 \times 10^{-3}$ (331 nm)  | $1.6 \times 10^{-3}$ (408 nm)  |
| <i>M-7d</i> | DCM                | $-2.3 \times 10^{-3}$ (333 nm) | $-1.6 \times 10^{-3}$ (413 nm) |
| <i>P-7d</i> | CH <sub>3</sub> CN | $2.2 \times 10^{-3}$ (325 nm)  | $1.7 \times 10^{-3}$ (406 nm)  |
| <i>M-7d</i> | CH <sub>3</sub> CN | $-2.2 \times 10^{-3}$ (328 nm) | $-1.6 \times 10^{-3}$ (400 nm) |
| <i>P-8</i>  | Toluene            | $1.8 \times 10^{-3}$ (332 nm)  | $2.1 \times 10^{-3}$ (410 nm)  |
| <i>M-8</i>  | Toluene            | $-1.9 \times 10^{-3}$ (335 nm) | $-1.9 \times 10^{-3}$ (411 nm) |

**Table S15.** Data of CD and CPL spectra

|                |                    |                                |                                |
|----------------|--------------------|--------------------------------|--------------------------------|
| <i>P-8</i>     | DCM                | $1.9 \times 10^{-3}$ (335 nm)  | $1.9 \times 10^{-3}$ (420 nm)  |
| <i>M-8</i>     | DCM                | $-1.9 \times 10^{-3}$ (335 nm) | $-1.8 \times 10^{-3}$ (421 nm) |
| <i>P-8</i>     | CH <sub>3</sub> CN | $2.1 \times 10^{-3}$ (334 nm)  | $1.9 \times 10^{-3}$ (418 nm)  |
| <i>M-8</i>     | CH <sub>3</sub> CN | $-2.1 \times 10^{-3}$ (335 nm) | $-1.8 \times 10^{-3}$ (419 nm) |
| <i>M-15</i>    | CH <sub>3</sub> CN | $1.5 \times 10^{-3}$ (523 nm)  | -                              |
| <i>P-15</i>    | CH <sub>3</sub> CN | $-1.5 \times 10^{-3}$ (523 nm) | -                              |
| <i>M-16</i>    | Toluene            | $4.2 \times 10^{-4}$ (531 nm)  | -                              |
| <i>P-16</i>    | Toluene            | $-4.2 \times 10^{-4}$ (531 nm) | -                              |
| <i>M-16</i>    | DCM                | $6.7 \times 10^{-4}$ (529 nm)  | -                              |
| <i>P-16</i>    | DCM                | $-6.2 \times 10^{-4}$ (529 nm) | -                              |
| <i>M-16</i>    | CH <sub>3</sub> CN | $1.3 \times 10^{-3}$ (525 nm)  | -                              |
| <i>P-16</i>    | CH <sub>3</sub> CN | $-1.2 \times 10^{-3}$ (524 nm) | -                              |
| <i>M,P-23b</i> | CH <sub>3</sub> CN | $-2.0 \times 10^{-3}$ (518 nm) | -                              |
| <i>P,M-23b</i> | CH <sub>3</sub> CN | $2.0 \times 10^{-3}$ (517 nm)  | -                              |
| <i>P,P-24b</i> | CH <sub>3</sub> CN | $-1.0 \times 10^{-3}$ (520 nm) | -                              |
| <i>M,M-24b</i> | CH <sub>3</sub> CN | $1.1 \times 10^{-3}$ (521 nm)  | -                              |
| <i>M,P-26a</i> | CH <sub>3</sub> CN | $-5.5 \times 10^{-4}$ (521 nm) | -                              |
| <i>P,M-26a</i> | CH <sub>3</sub> CN | $5.0 \times 10^{-4}$ (521 nm)  | -                              |
| <i>P,P-26b</i> | CH <sub>3</sub> CN | $-1.2 \times 10^{-3}$ (523 nm) | -                              |
| <i>M,M-26b</i> | CH <sub>3</sub> CN | $1.5 \times 10^{-3}$ (522 nm)  | -                              |

## 6. References

- [1] J. R. Lakowicz, *Principle of fluorescence spectroscopy*. Springer. Boston, **1999**.
- [2] R. F. Kubin, A. N. Fletcher, *J. Lumin.* **1982**, *27*, 255.
- [3] H.-L. Liu, Q.-Z. Wang, *Asian J. Chem.* **2014**, *26*, 5165.
- [4] G. Clavier, P. Audebert, *Chem. Rev.* **2010**, *110*, 3299.
- [5] H.-B. Liu, Q. Zhang, M.-X. Wang, *Angew. Chem. Int. Ed.* **2018**, *57*, 6536.

## 7. Copies of NMR Spectra

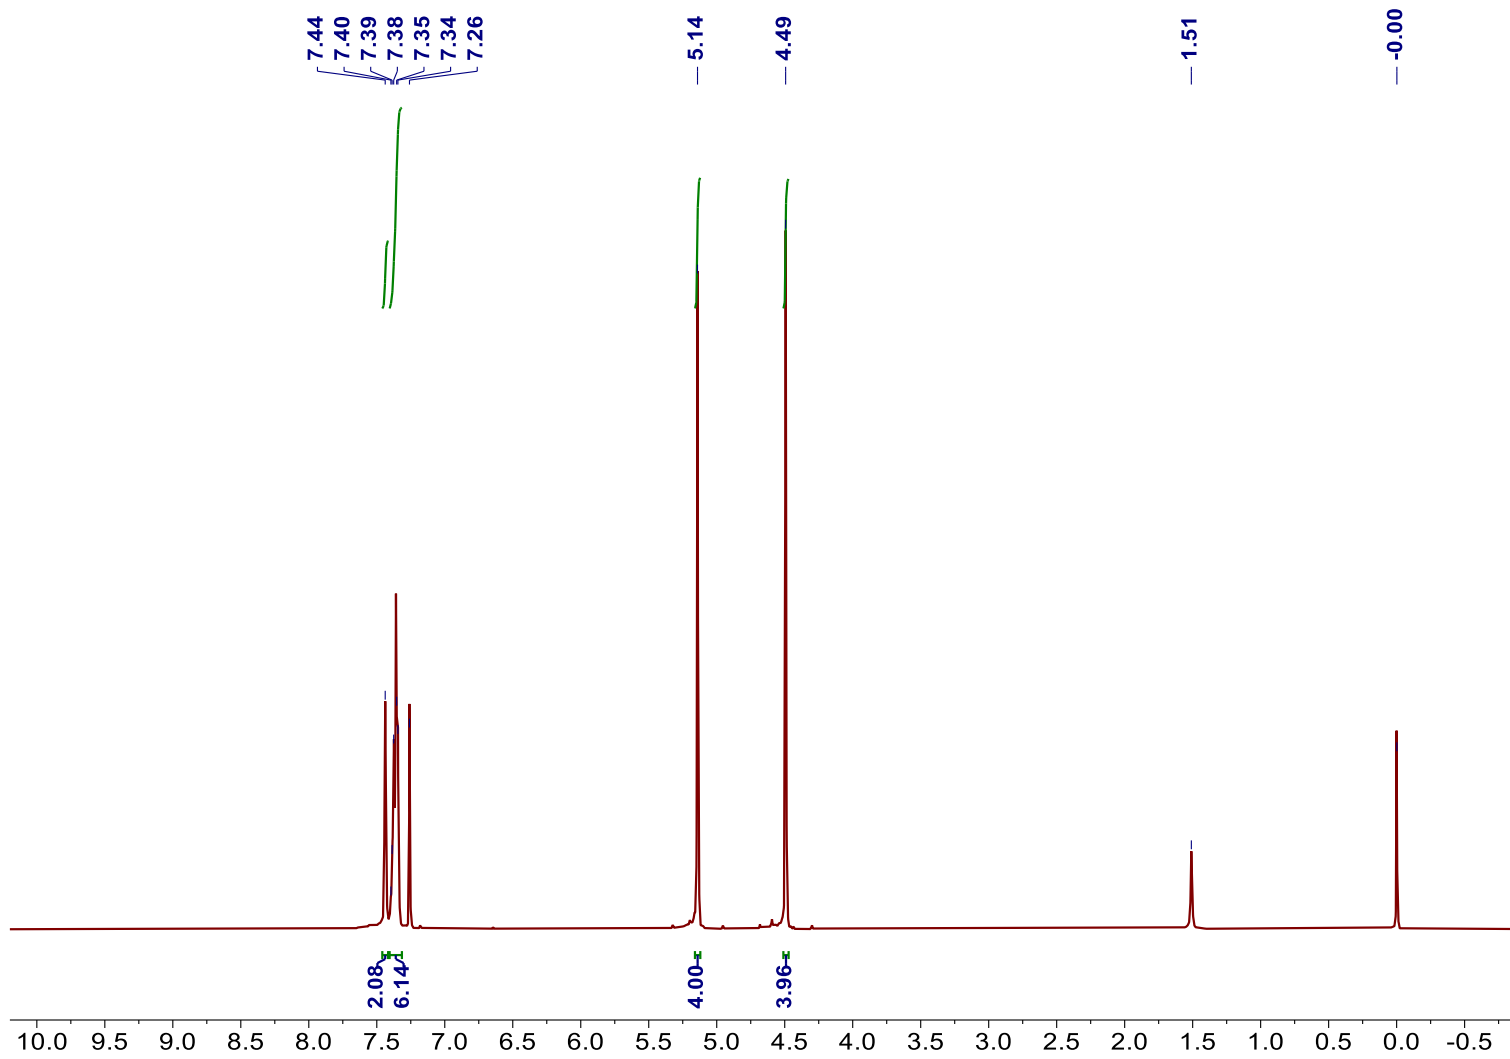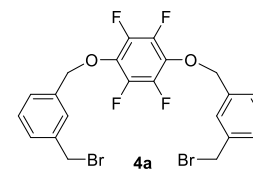

<sup>1</sup>H NMR  
CDCl<sub>3</sub>

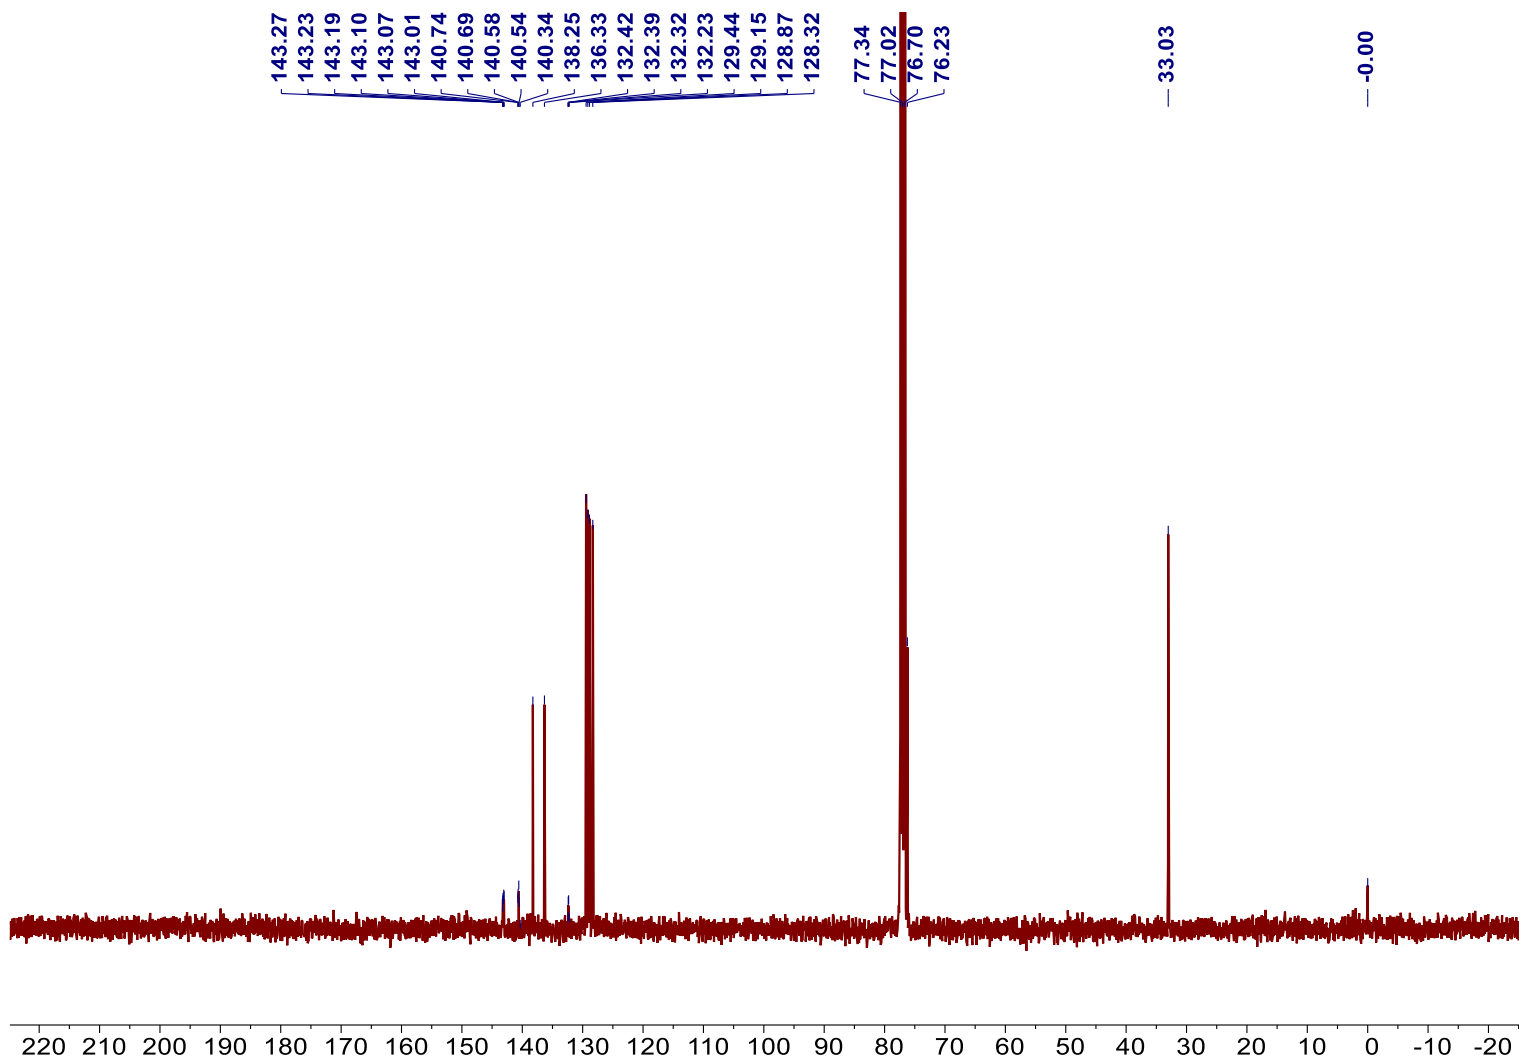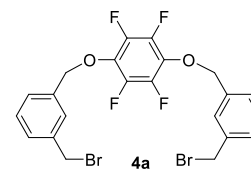

<sup>13</sup>C NMR

CDCl<sub>3</sub>

S87



<sup>19</sup>F NMR

CDCl<sub>3</sub>

-156.85

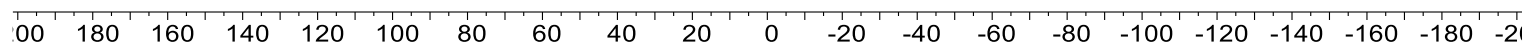

S88



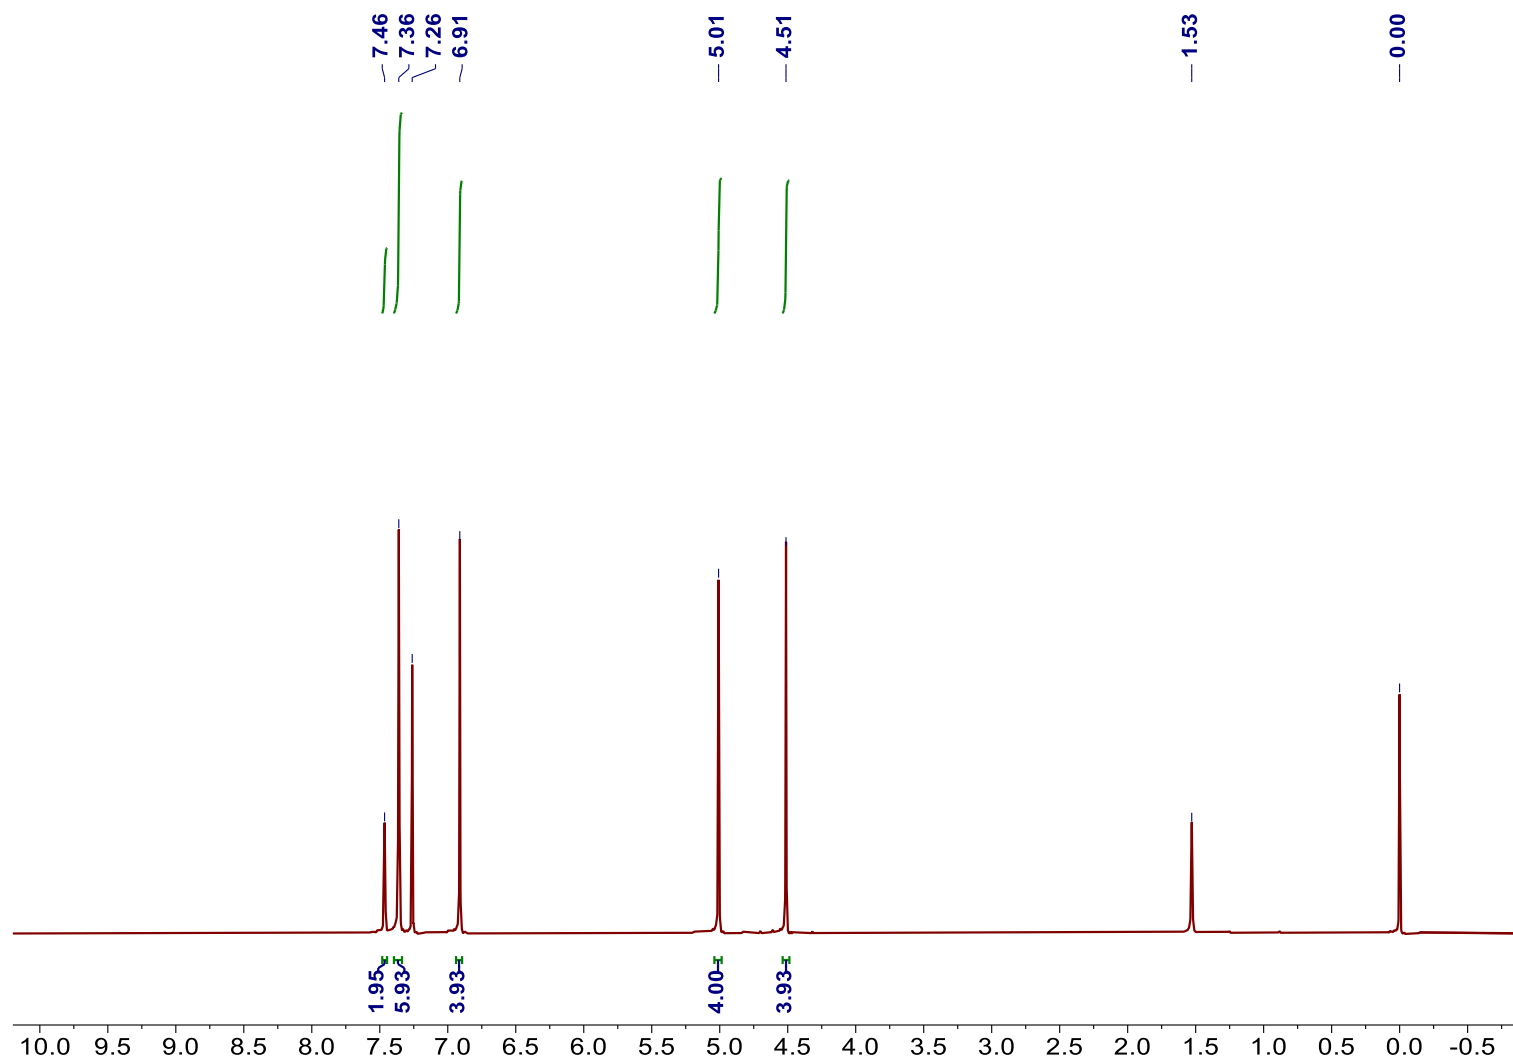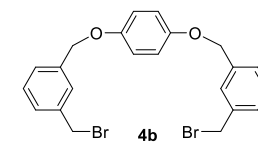

$^1\text{H}$  NMR  
 $\text{CDCl}_3$

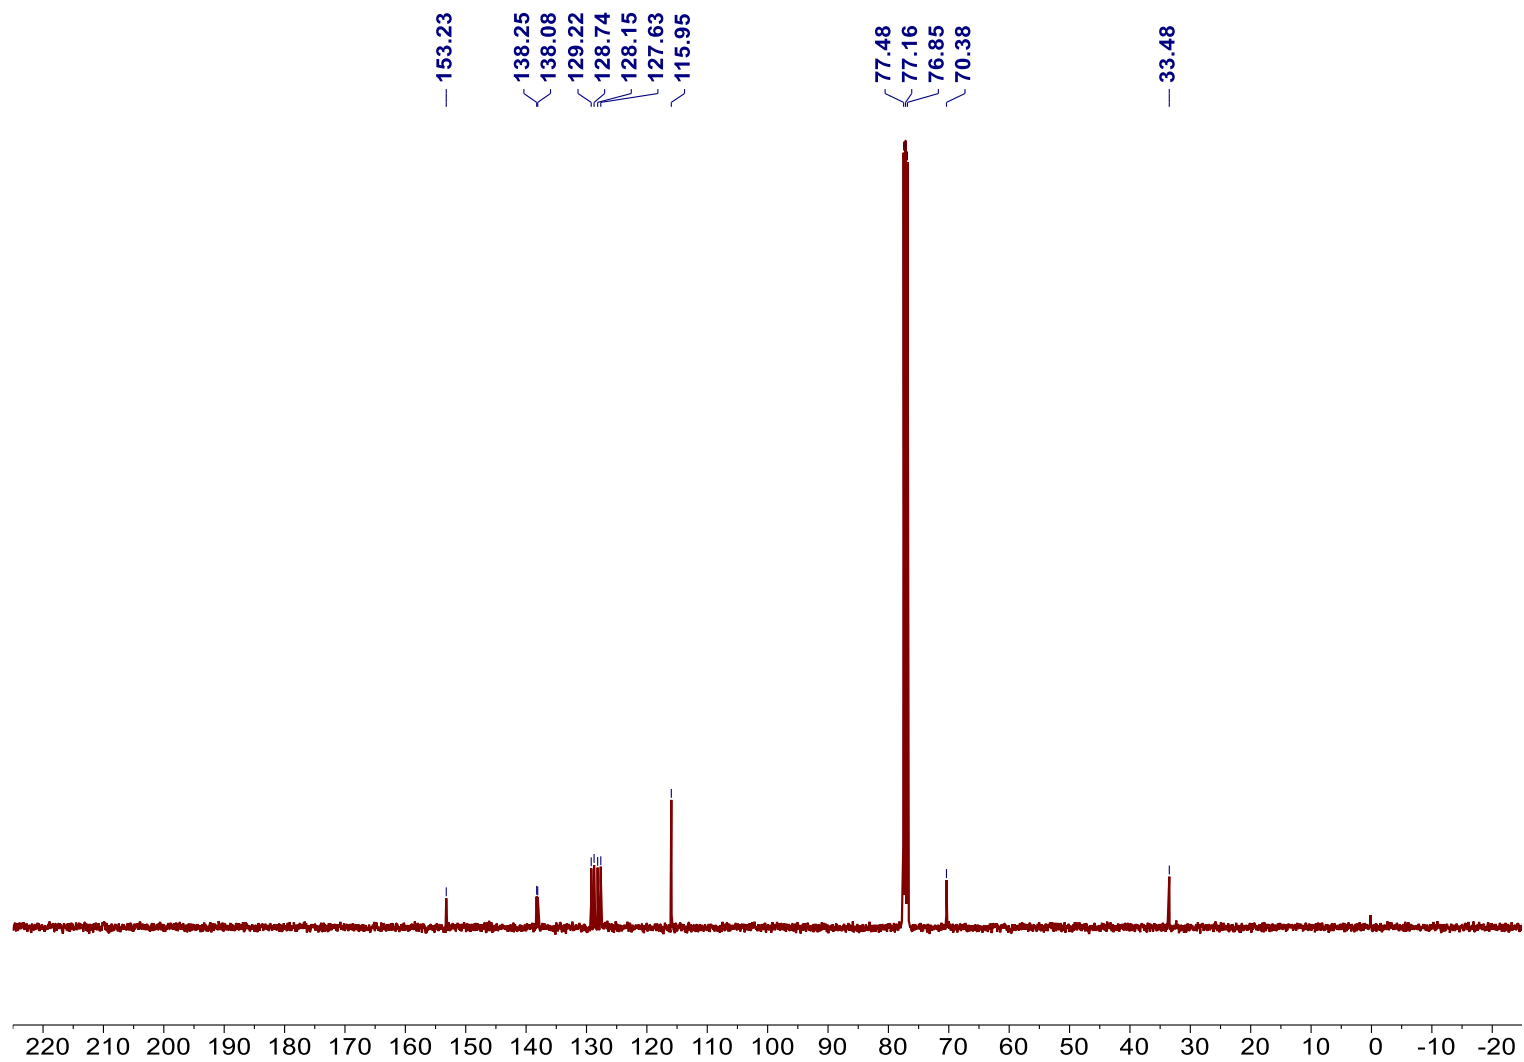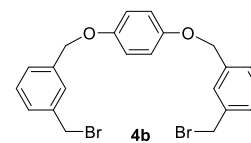

$^{13}\text{C}$  NMR  
 $\text{CDCl}_3$

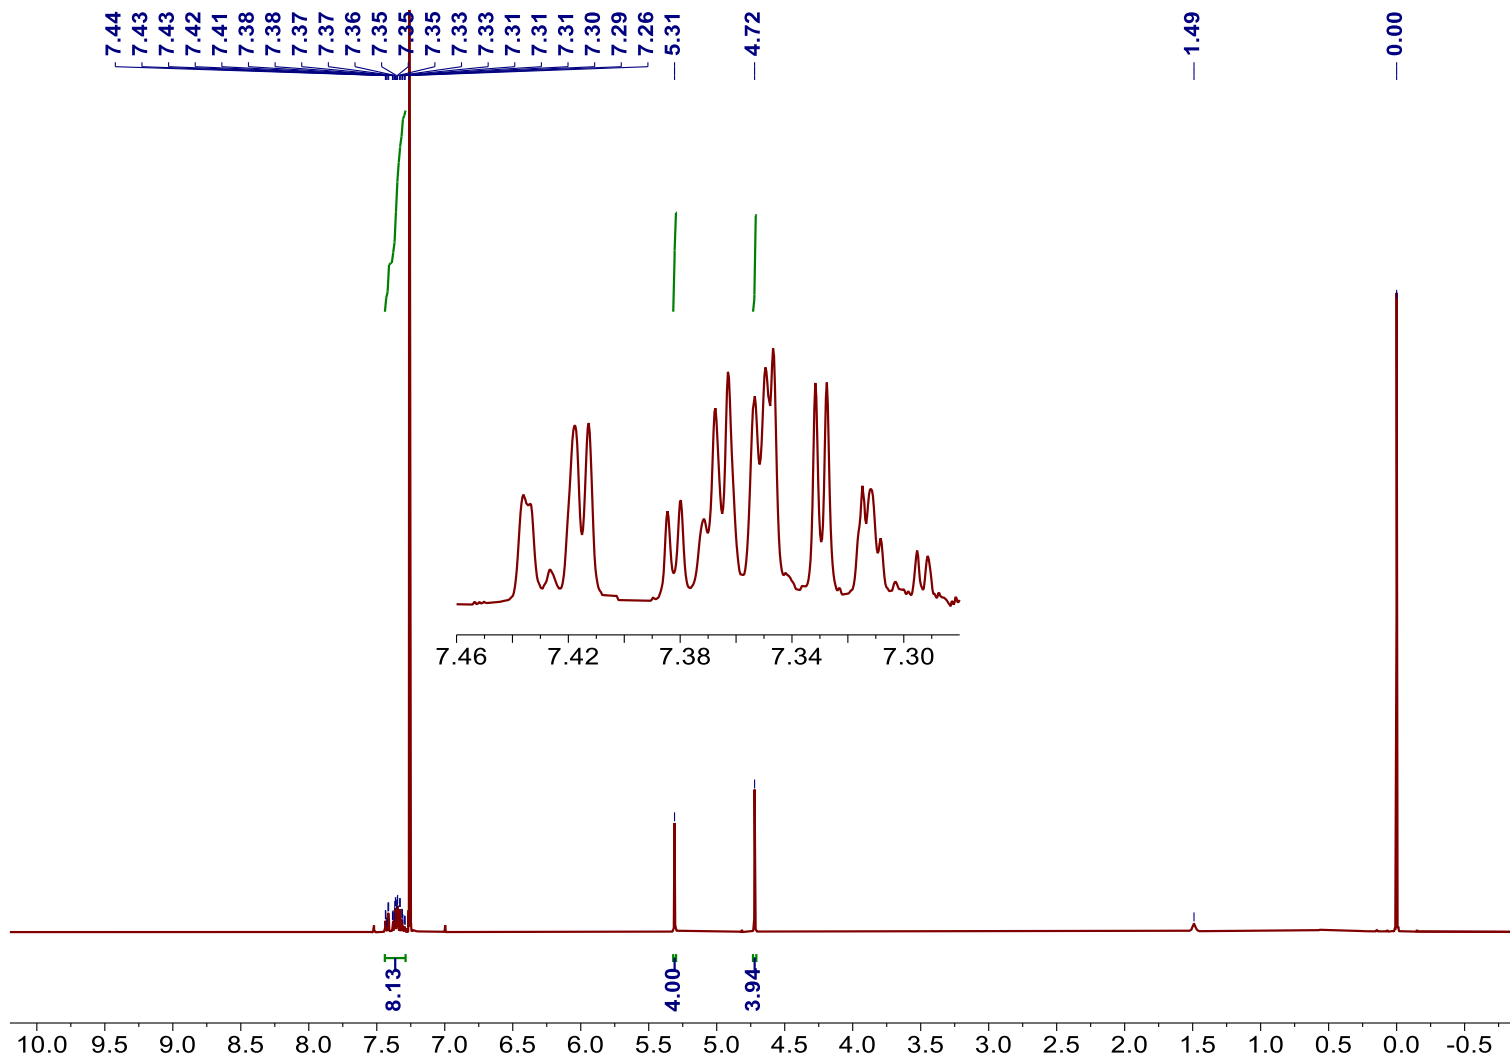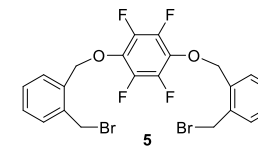

$^1\text{H}$  NMR  
 $\text{CDCl}_3$

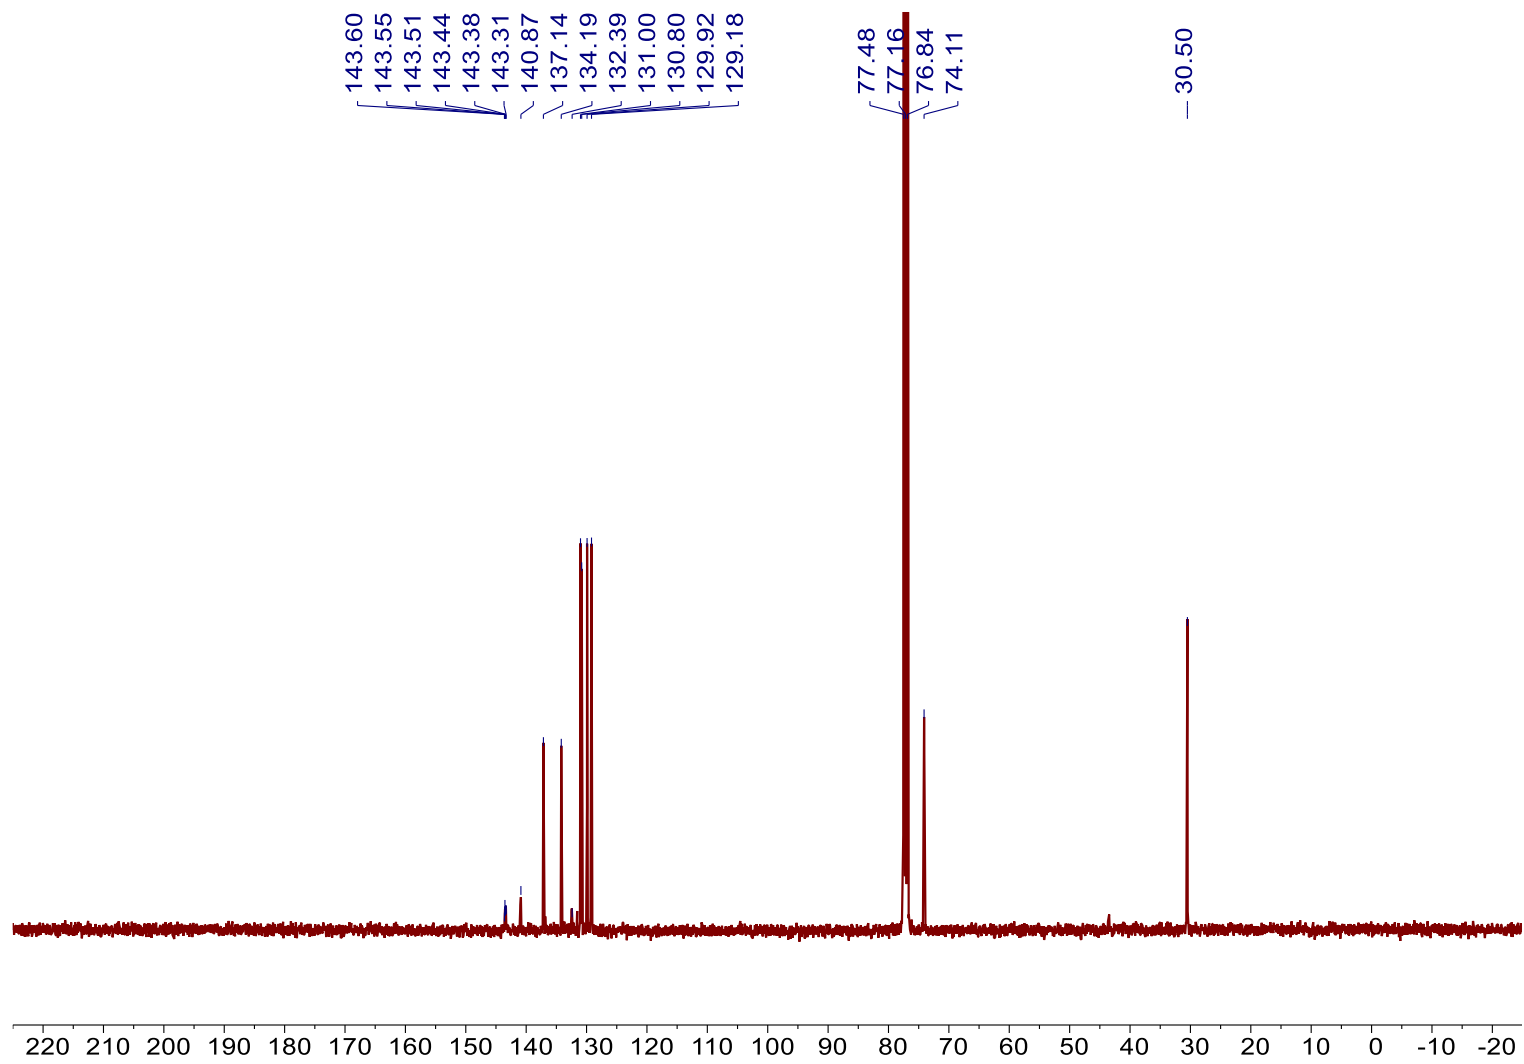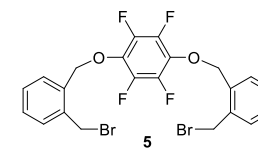

$^{13}\text{C}$  NMR  
 $\text{CDCl}_3$

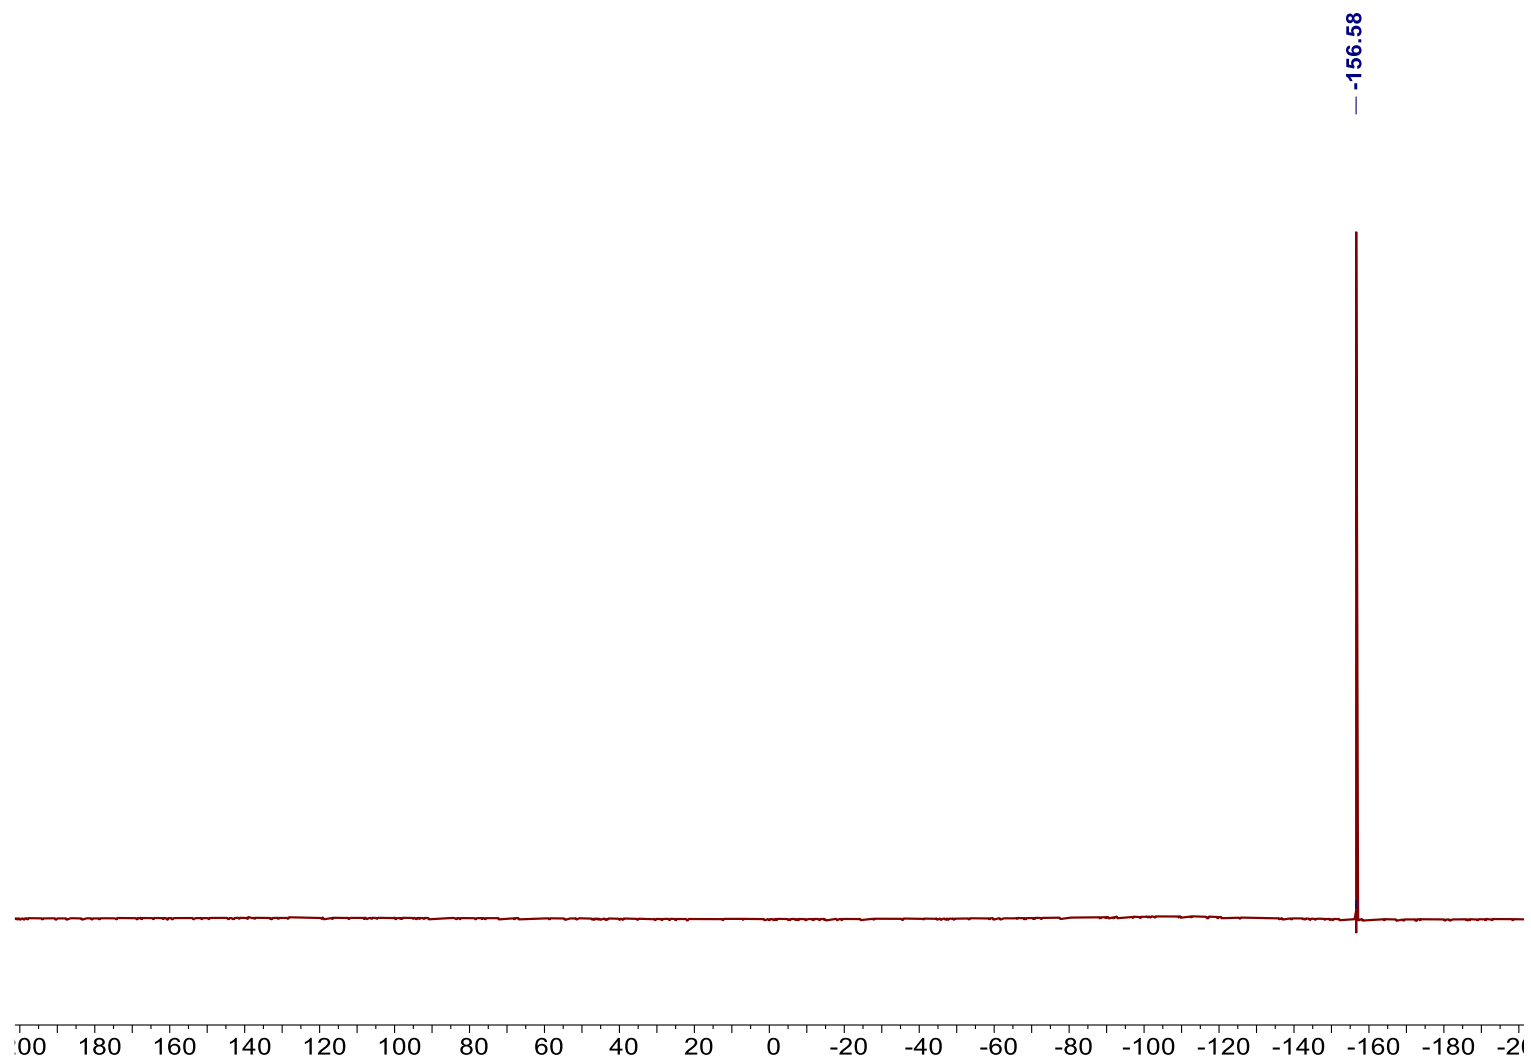

S93

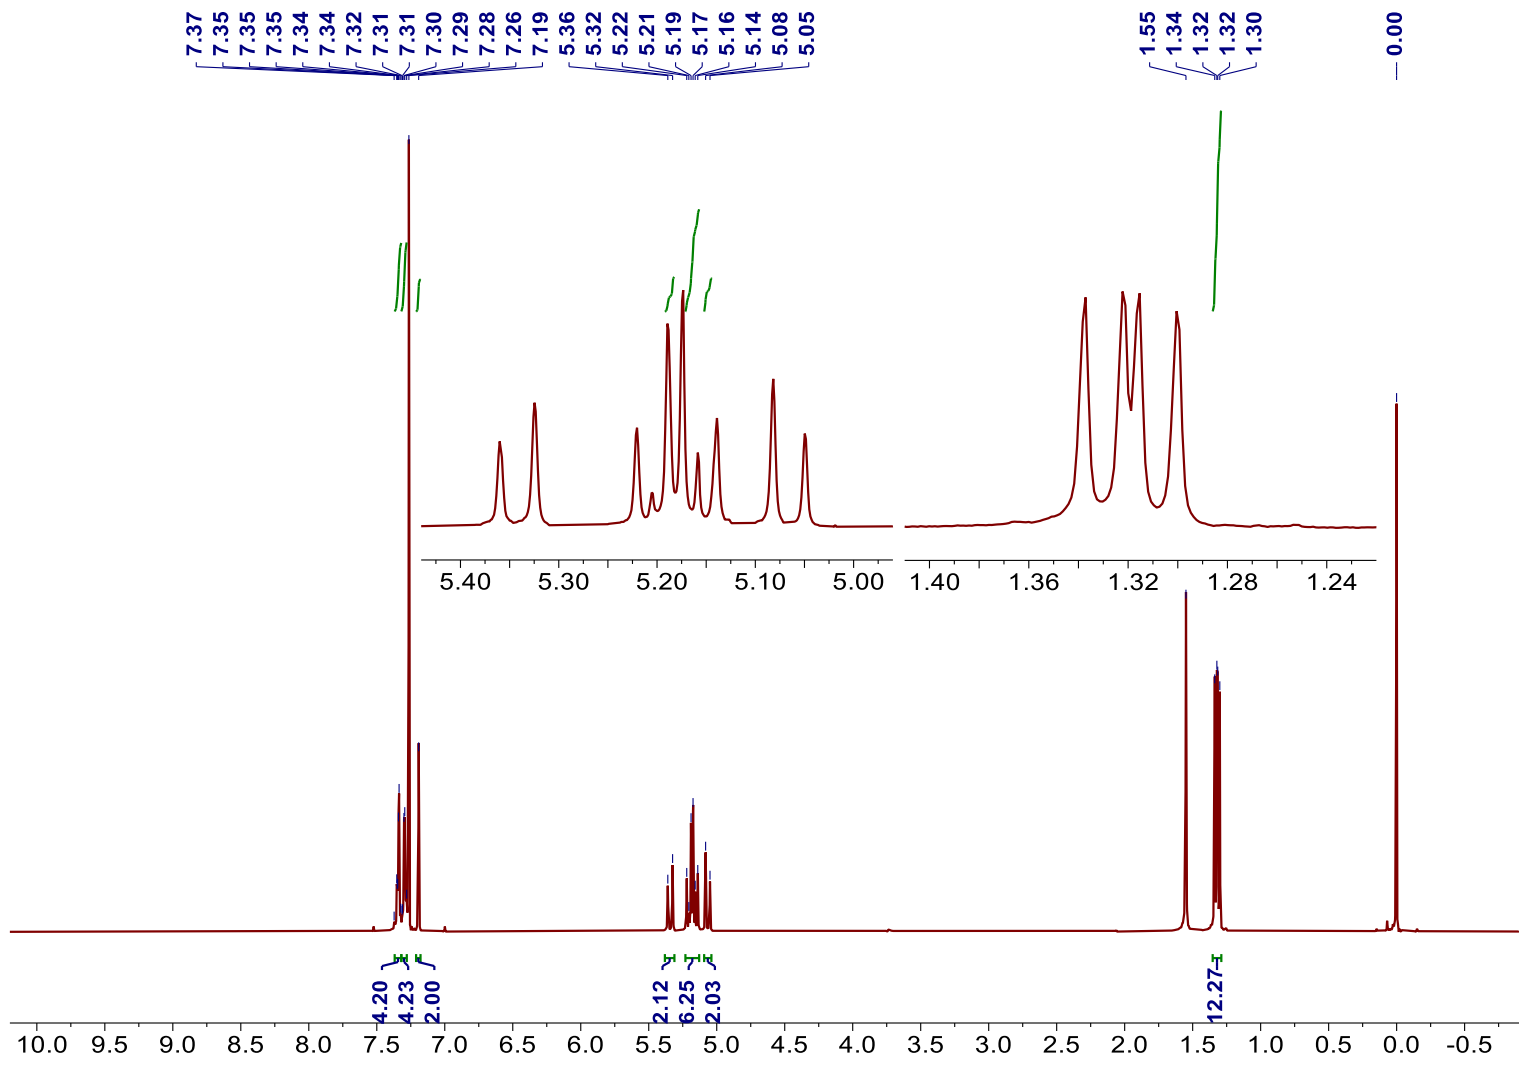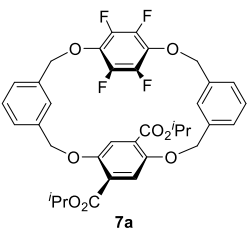

<sup>1</sup>H NMR  
CDCl<sub>3</sub>

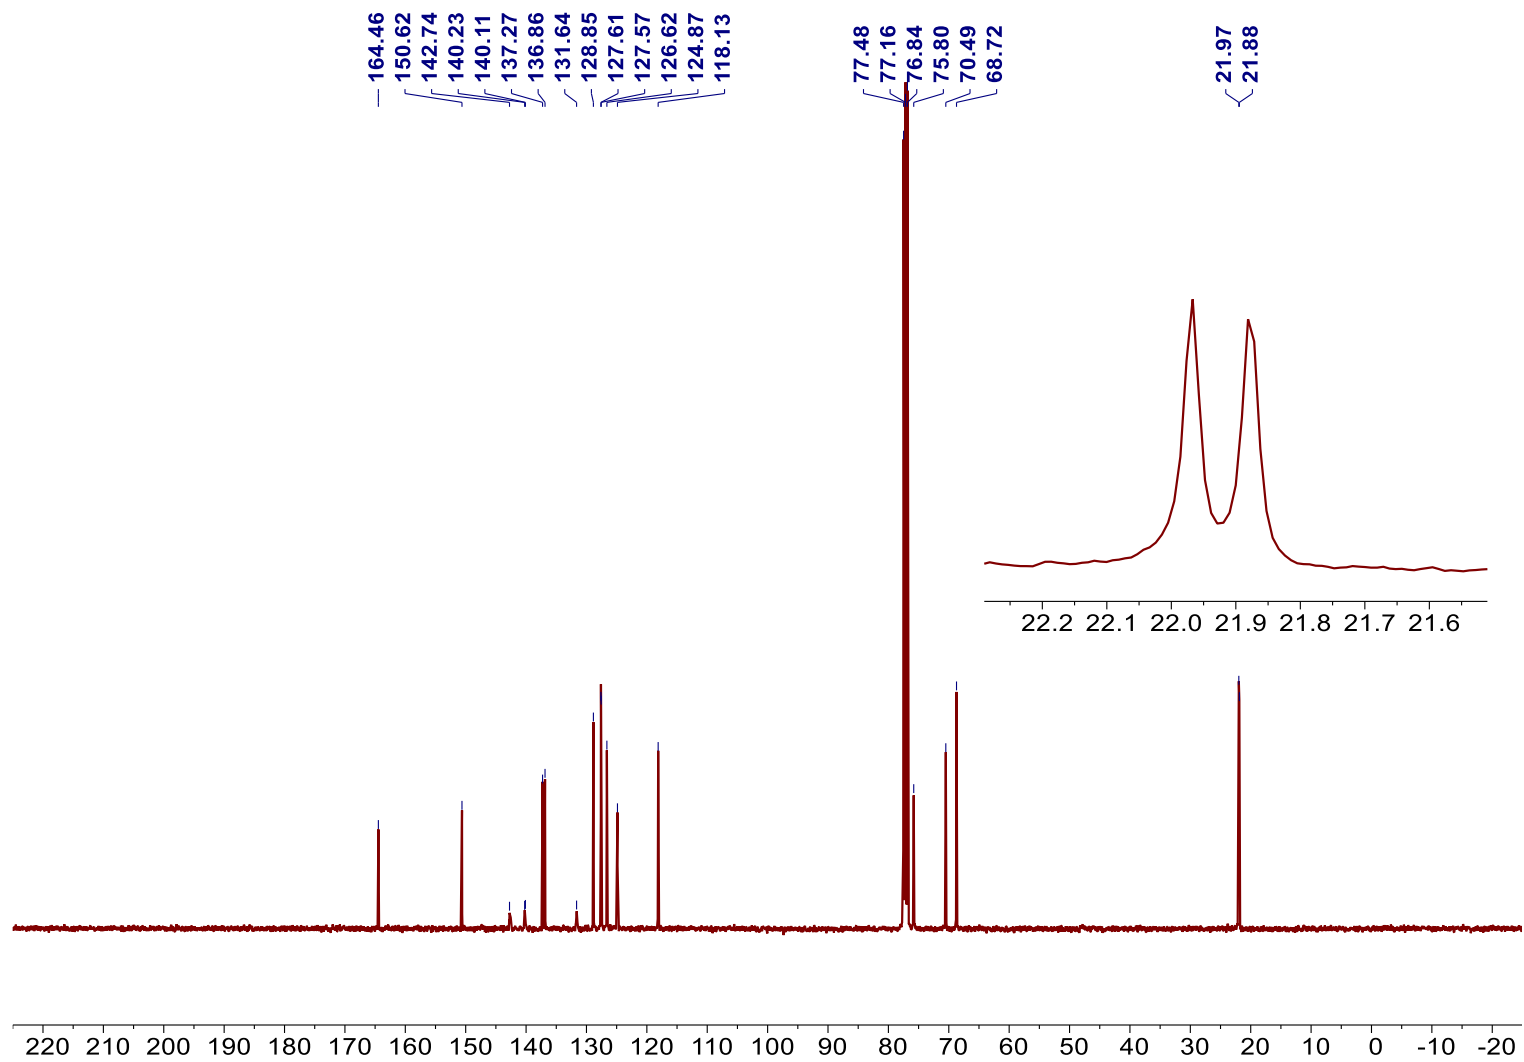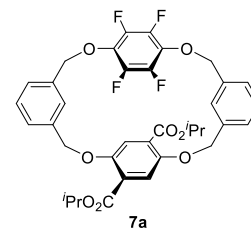

$^{13}\text{C}$  NMR  
 $\text{CDCl}_3$

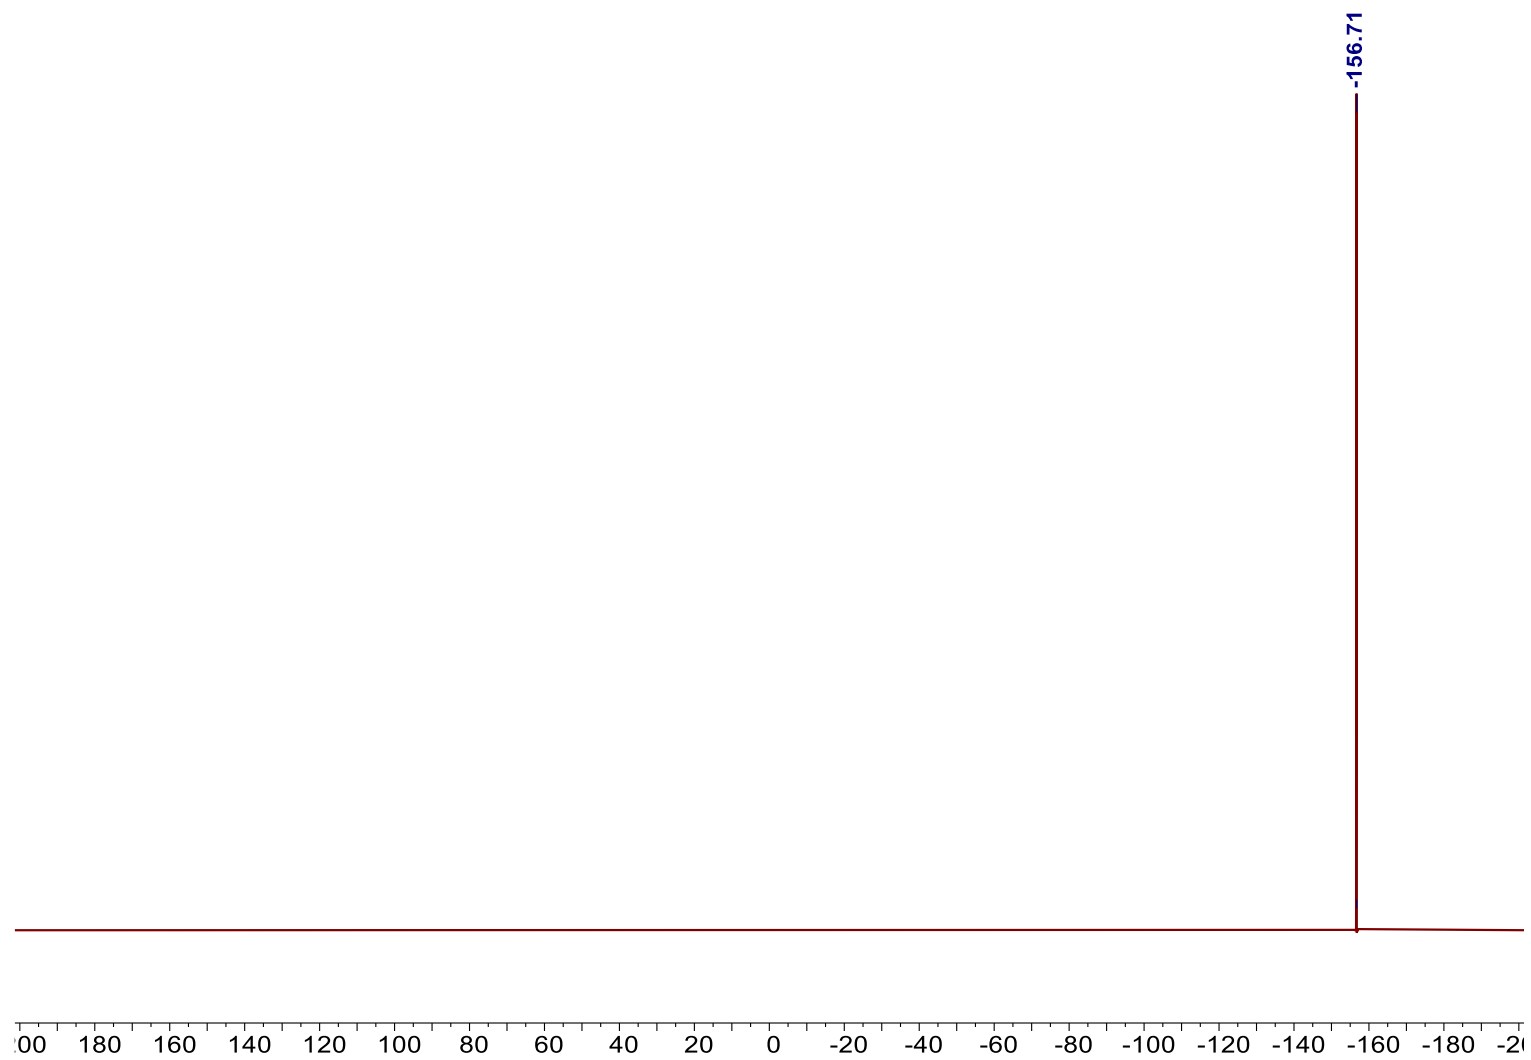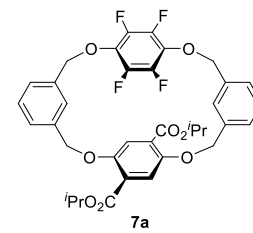

$^{19}\text{F}$  NMR  
 $\text{CDCl}_3$



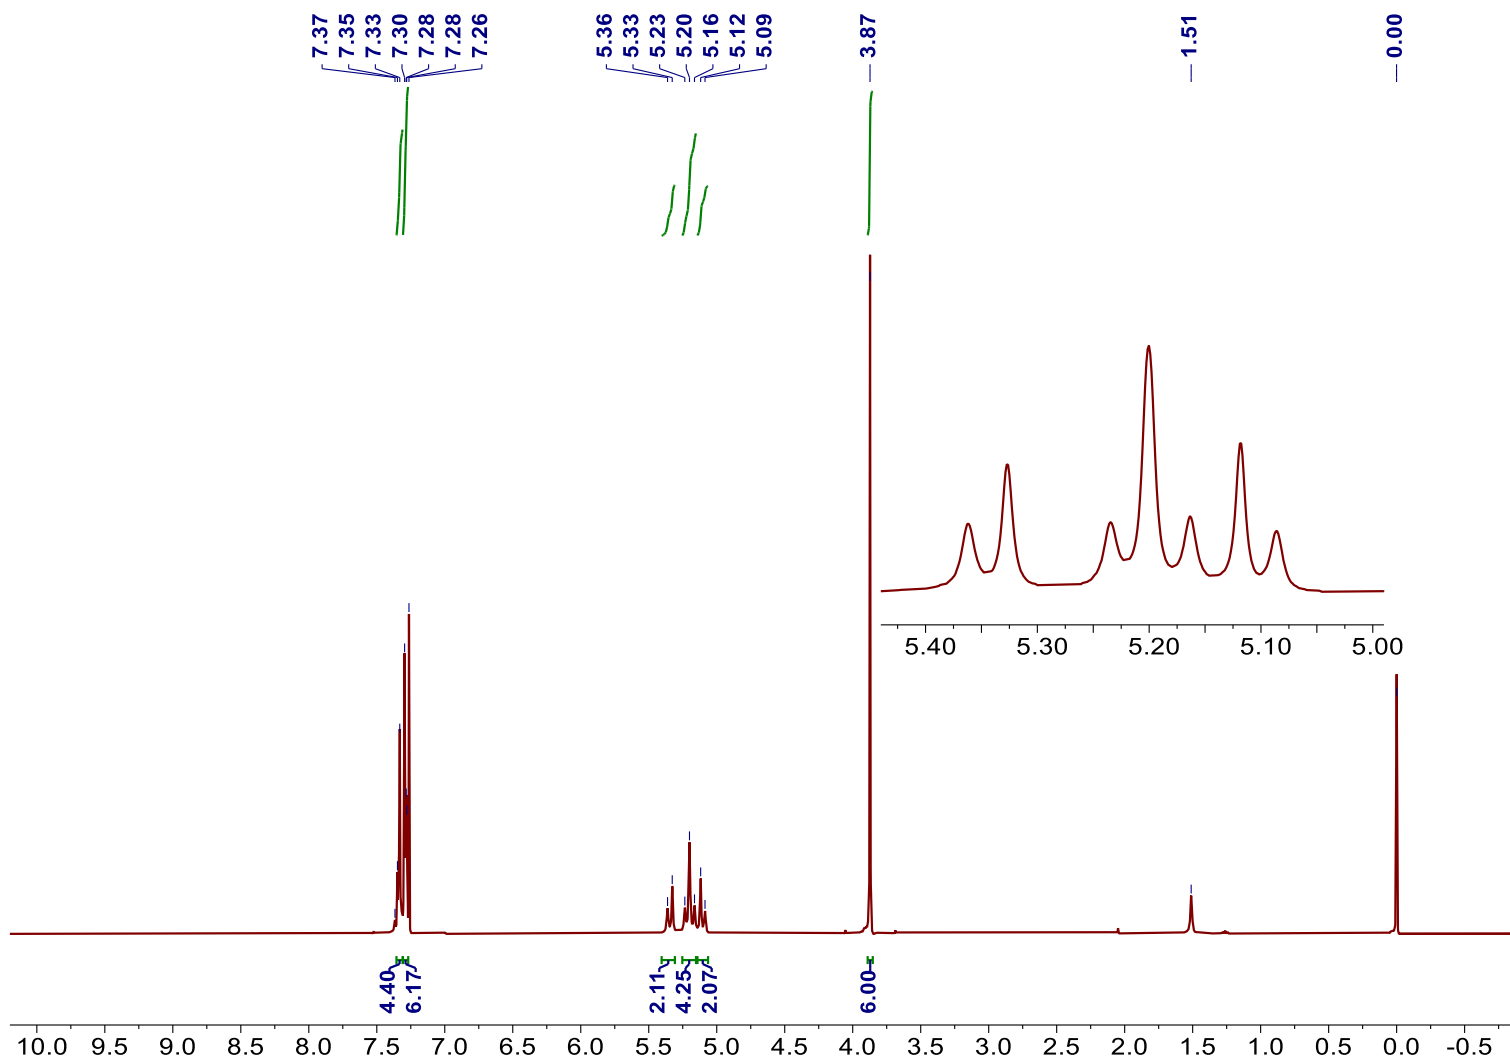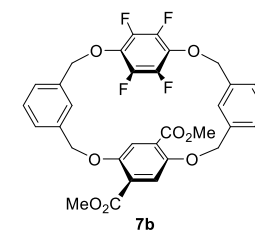

$^1\text{H}$  NMR  
 $\text{CDCl}_3$

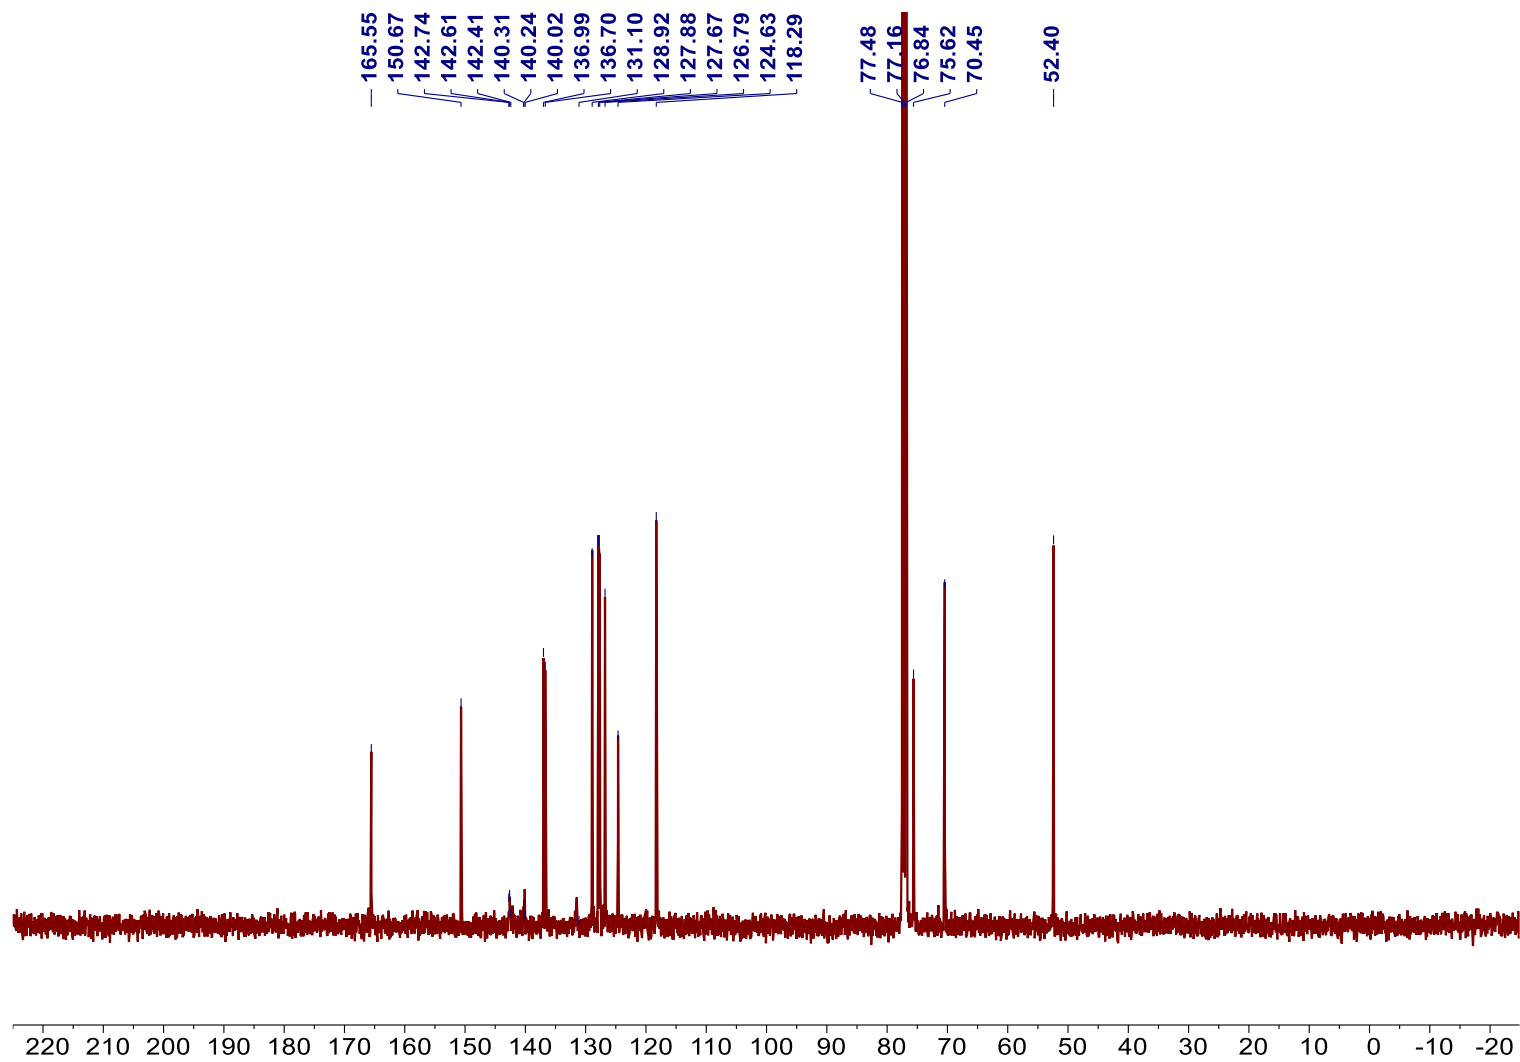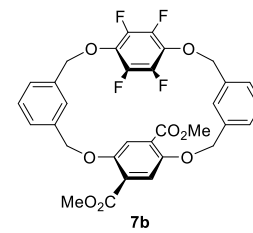

$^{13}\text{C}$  NMR  
 $\text{CDCl}_3$

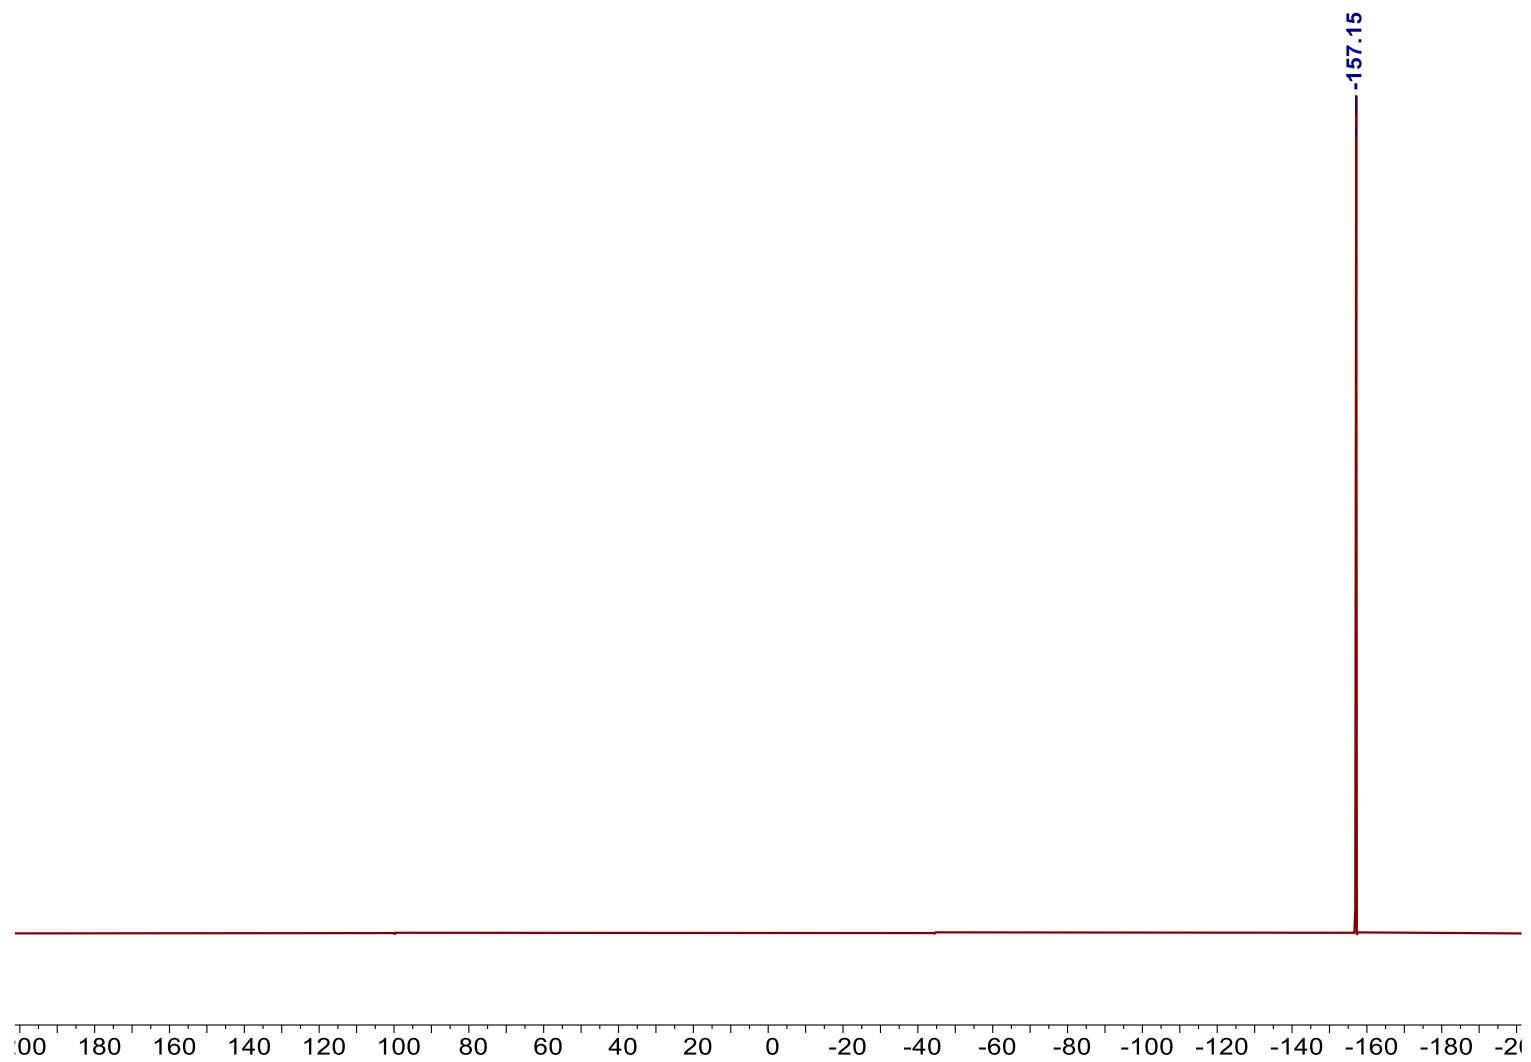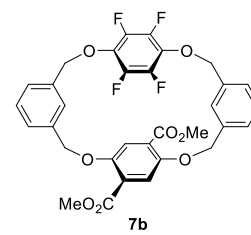

$^{19}\text{F}$  NMR  
 $\text{CDCl}_3$

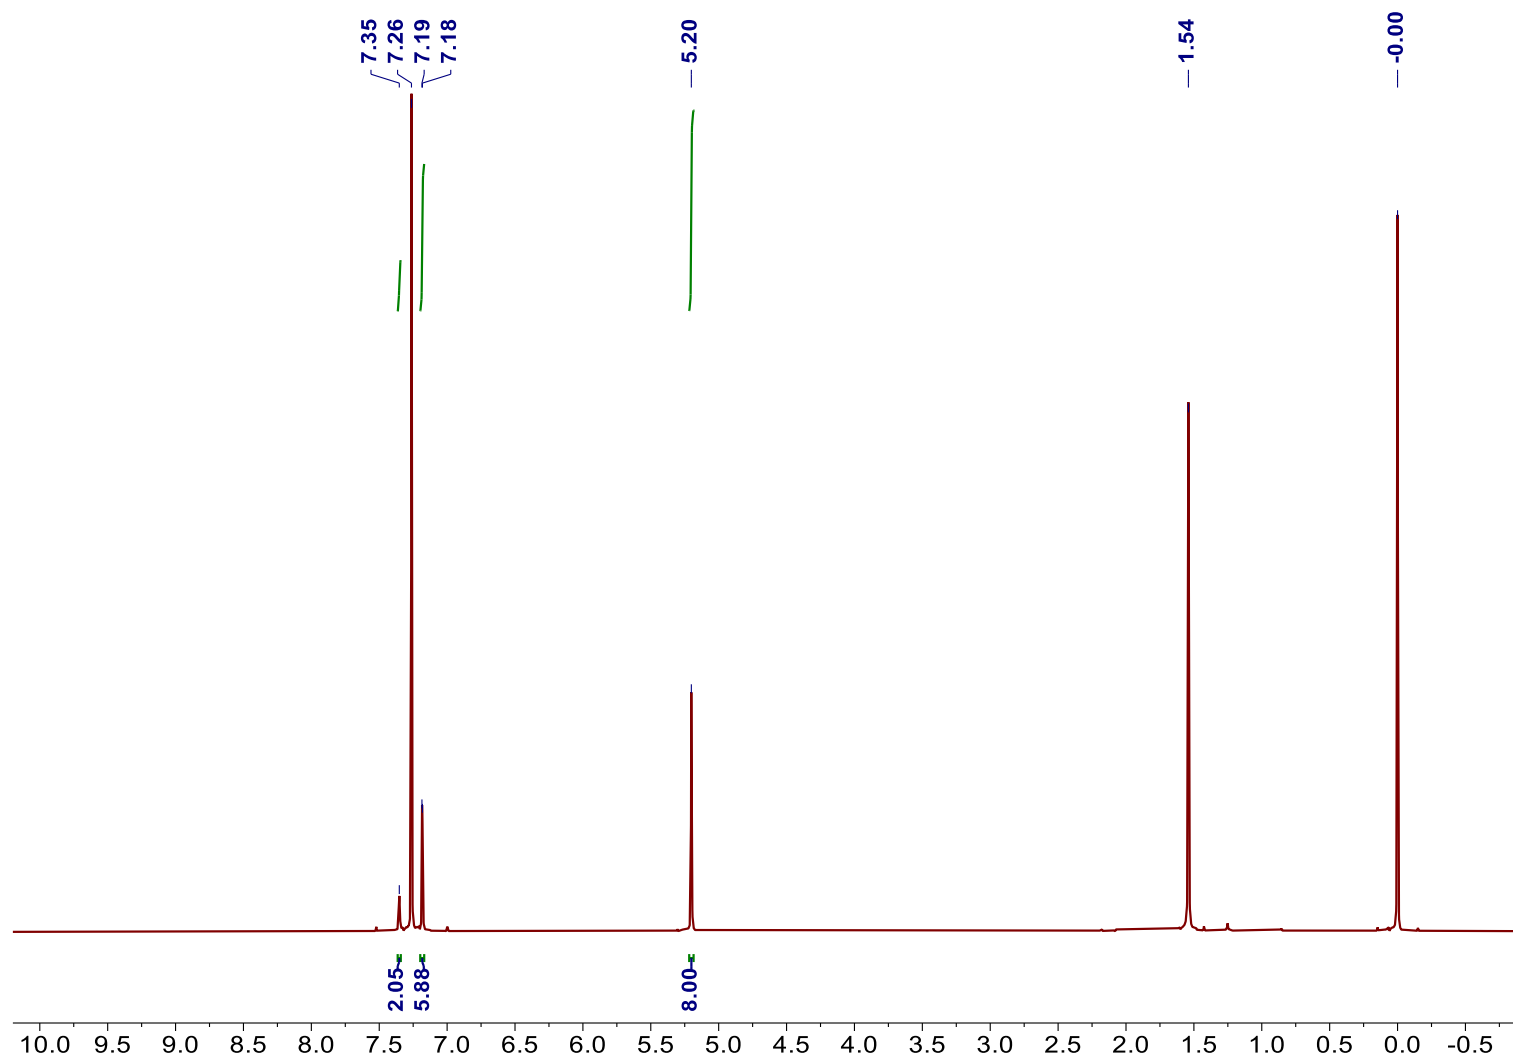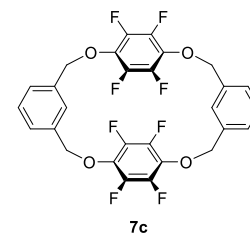

<sup>1</sup>H NMR  
CDCl<sub>3</sub>

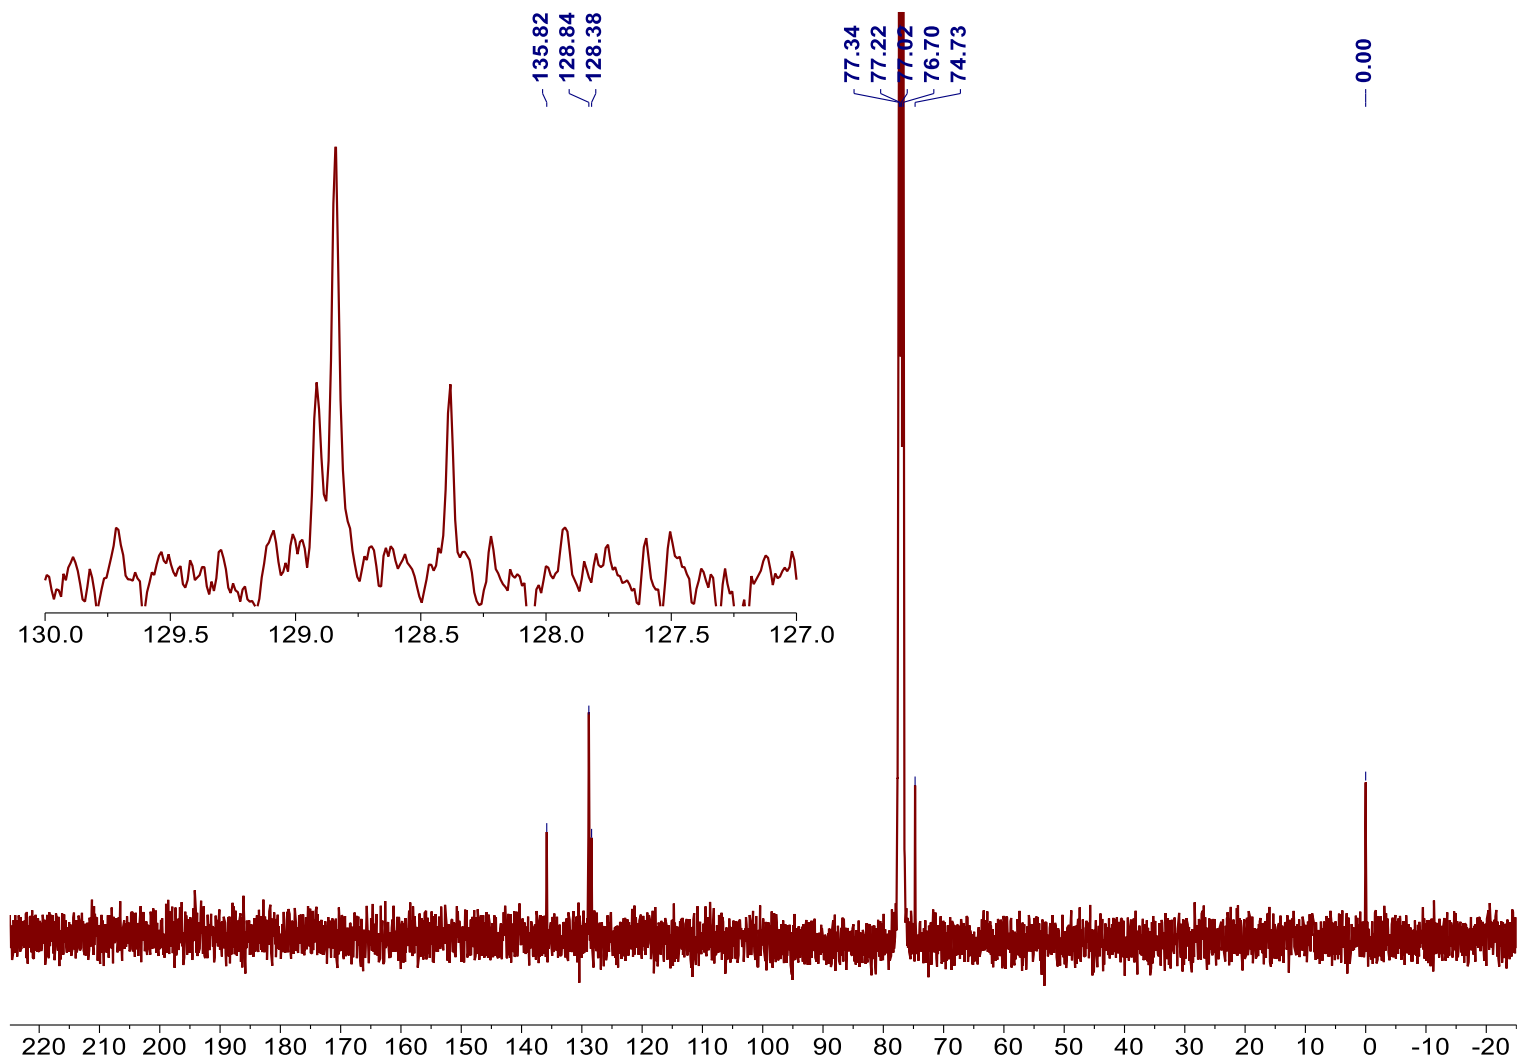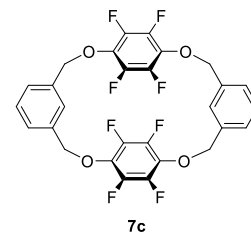

<sup>13</sup>C NMR  
CDCl<sub>3</sub>

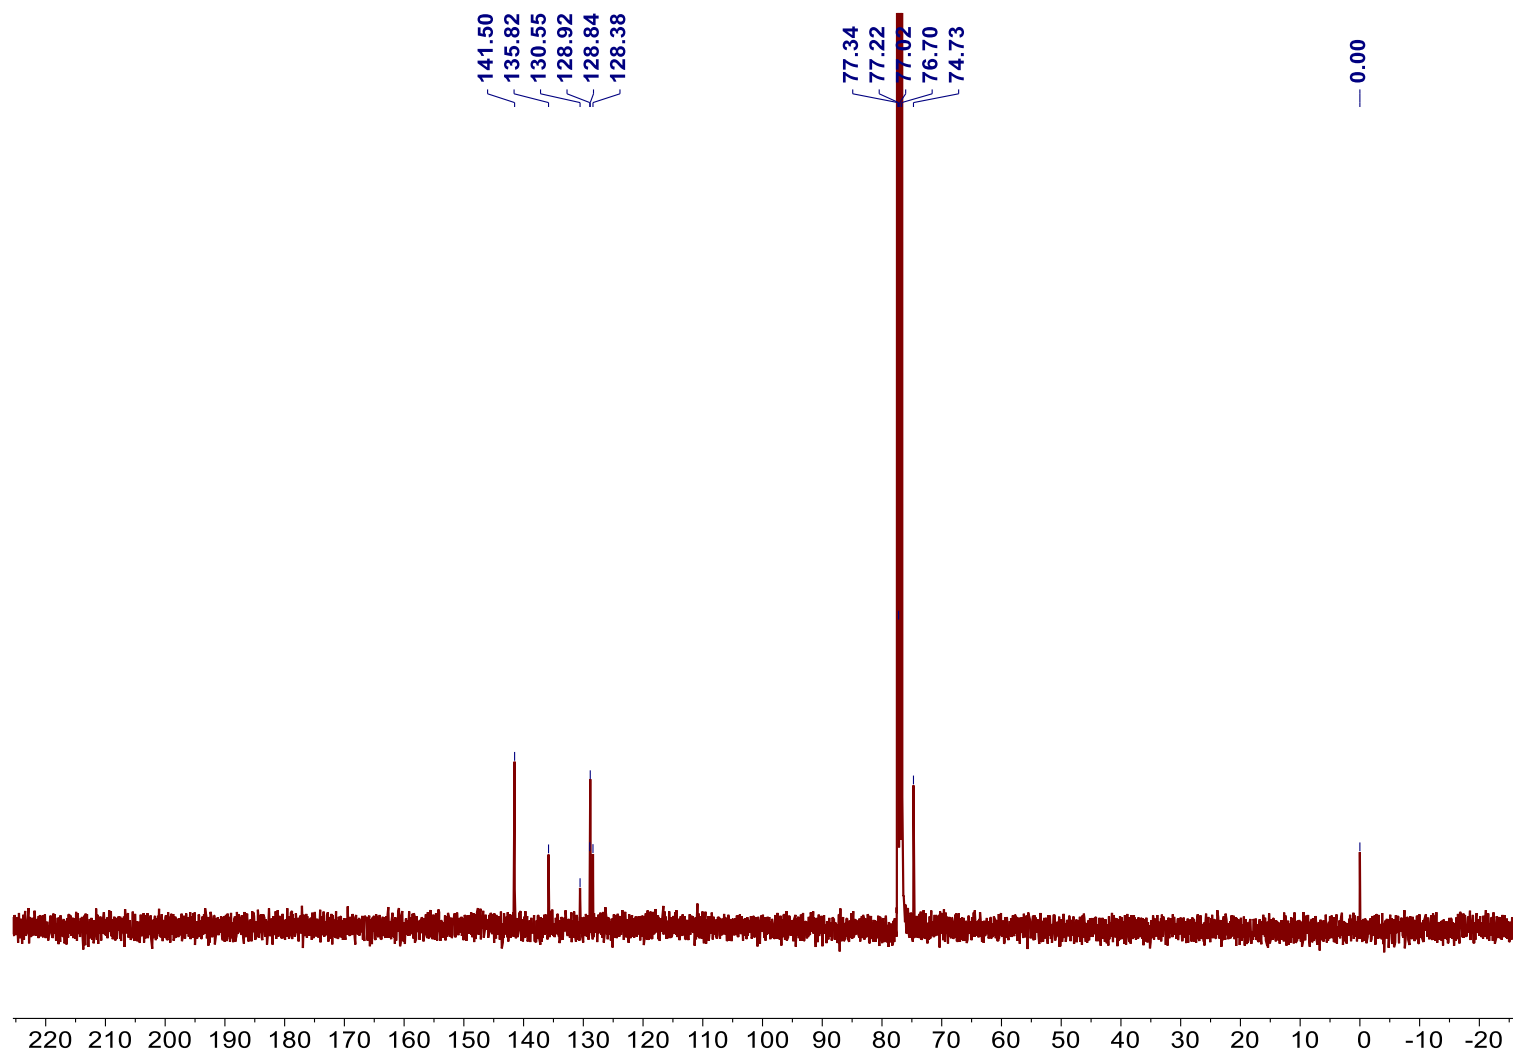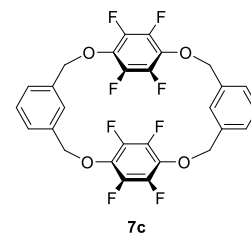

$^{13}\text{C}$ - $^{19}\text{F}$  decoupled  
NMR  
 $\text{CDCl}_3$

S102



$^{19}\text{F}$  NMR  
 $\text{CDCl}_3$

156.94

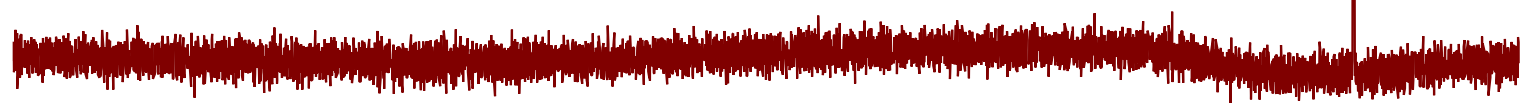

200 180 160 140 120 100 80 60 40 20 0 -20 -40 -60 -80 -100 -120 -140 -160 -180 -200

S103

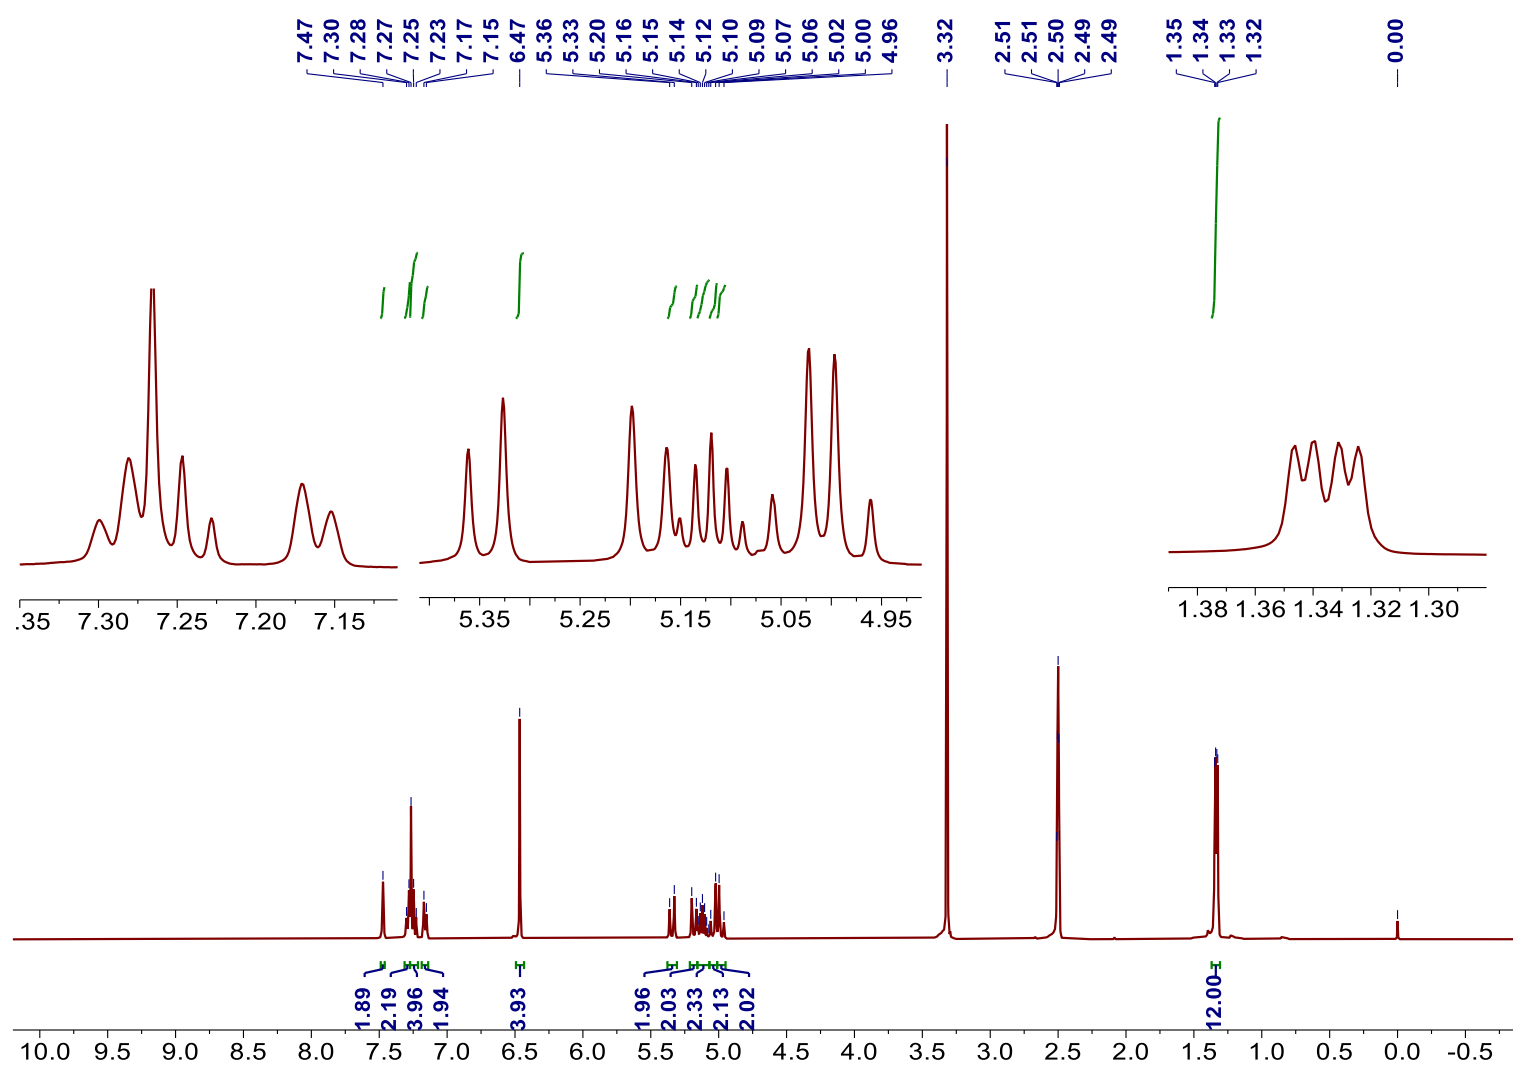

S104



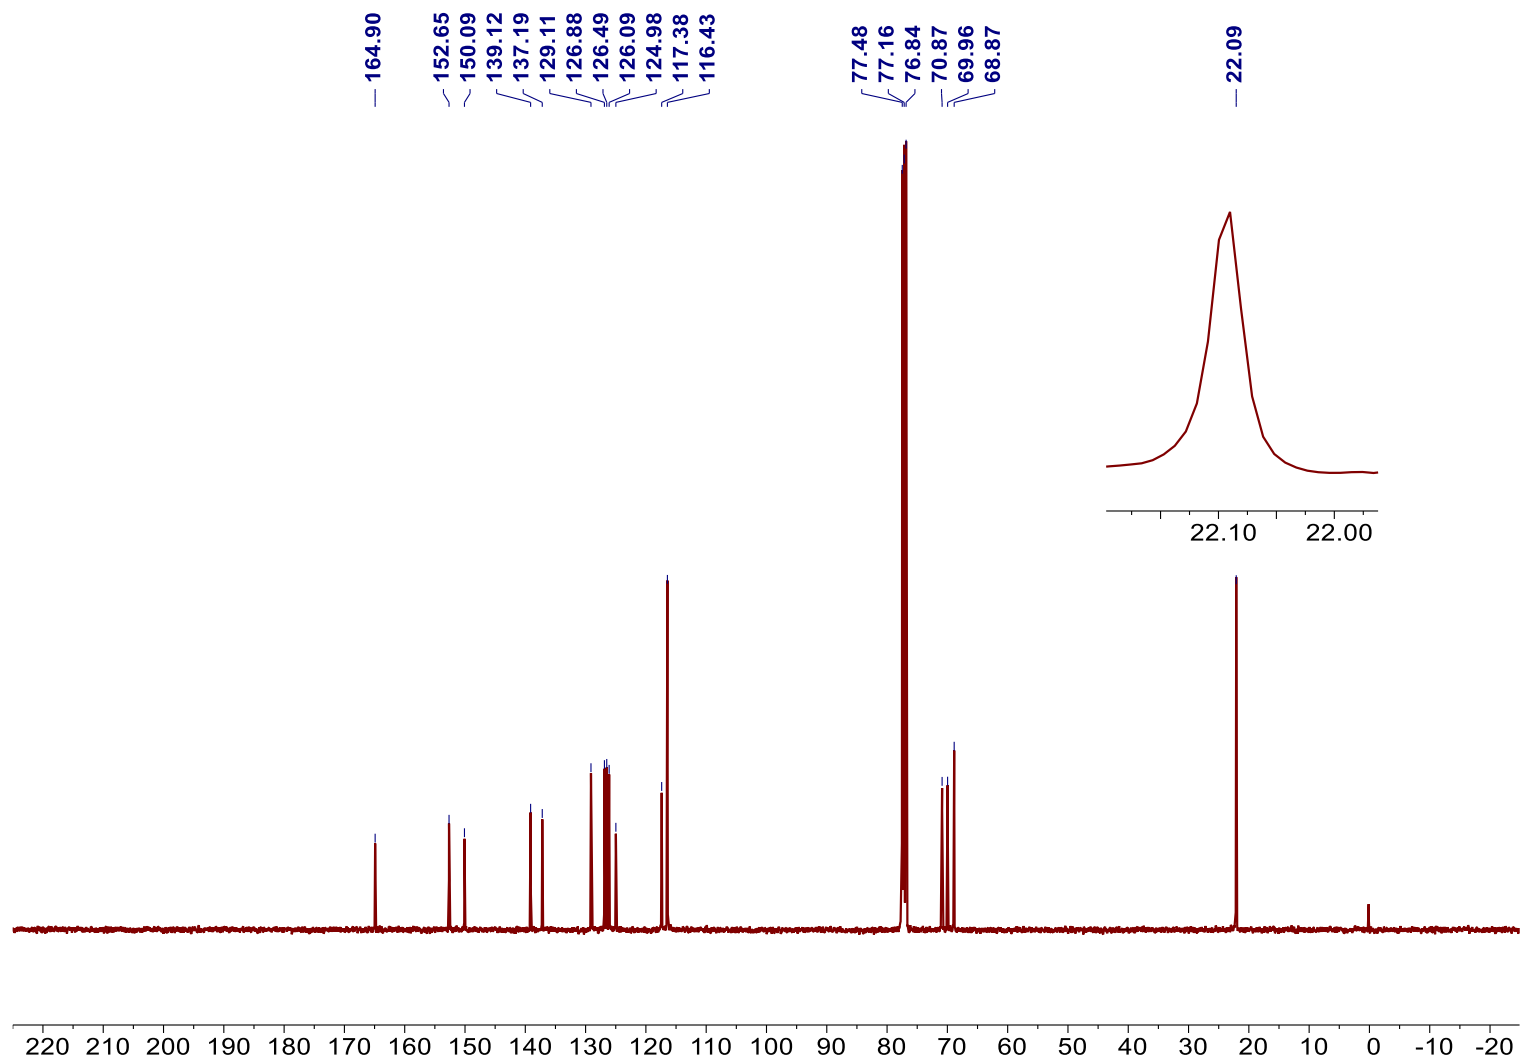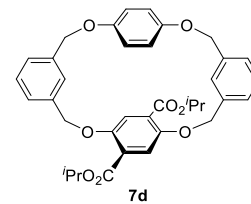

$^{13}\text{C}$  NMR  
 $\text{CDCl}_3$

S105

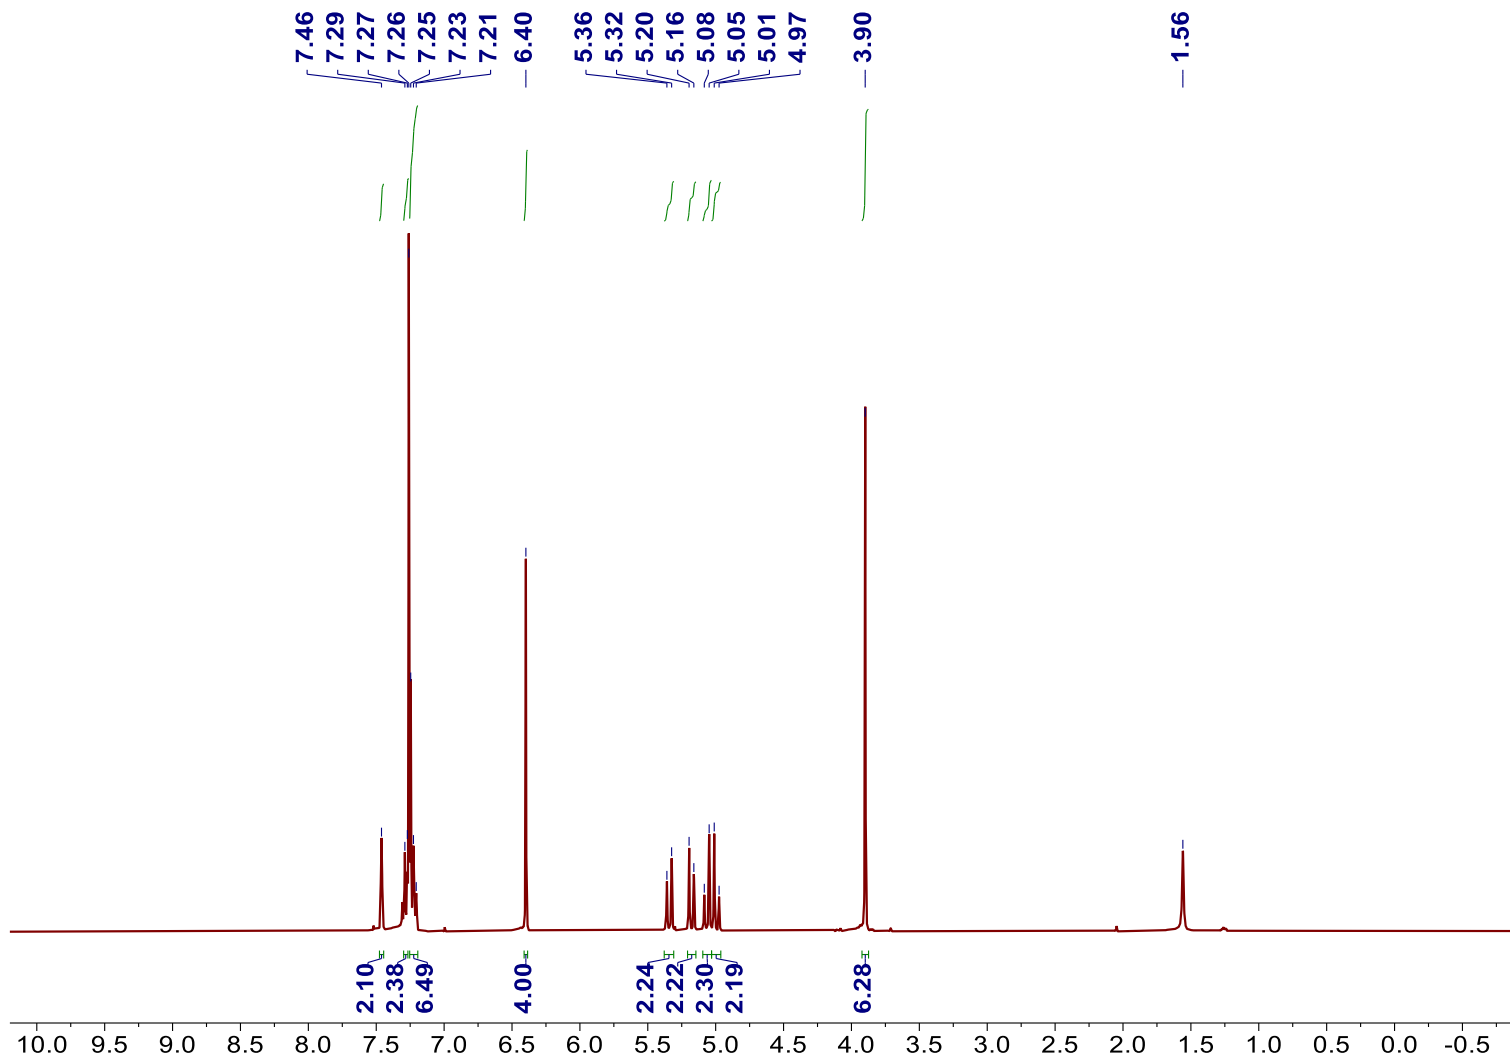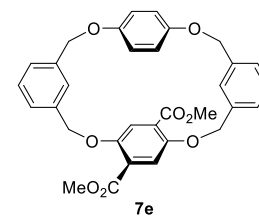

$^1\text{H}$  NMR  
 $\text{CDCl}_3$

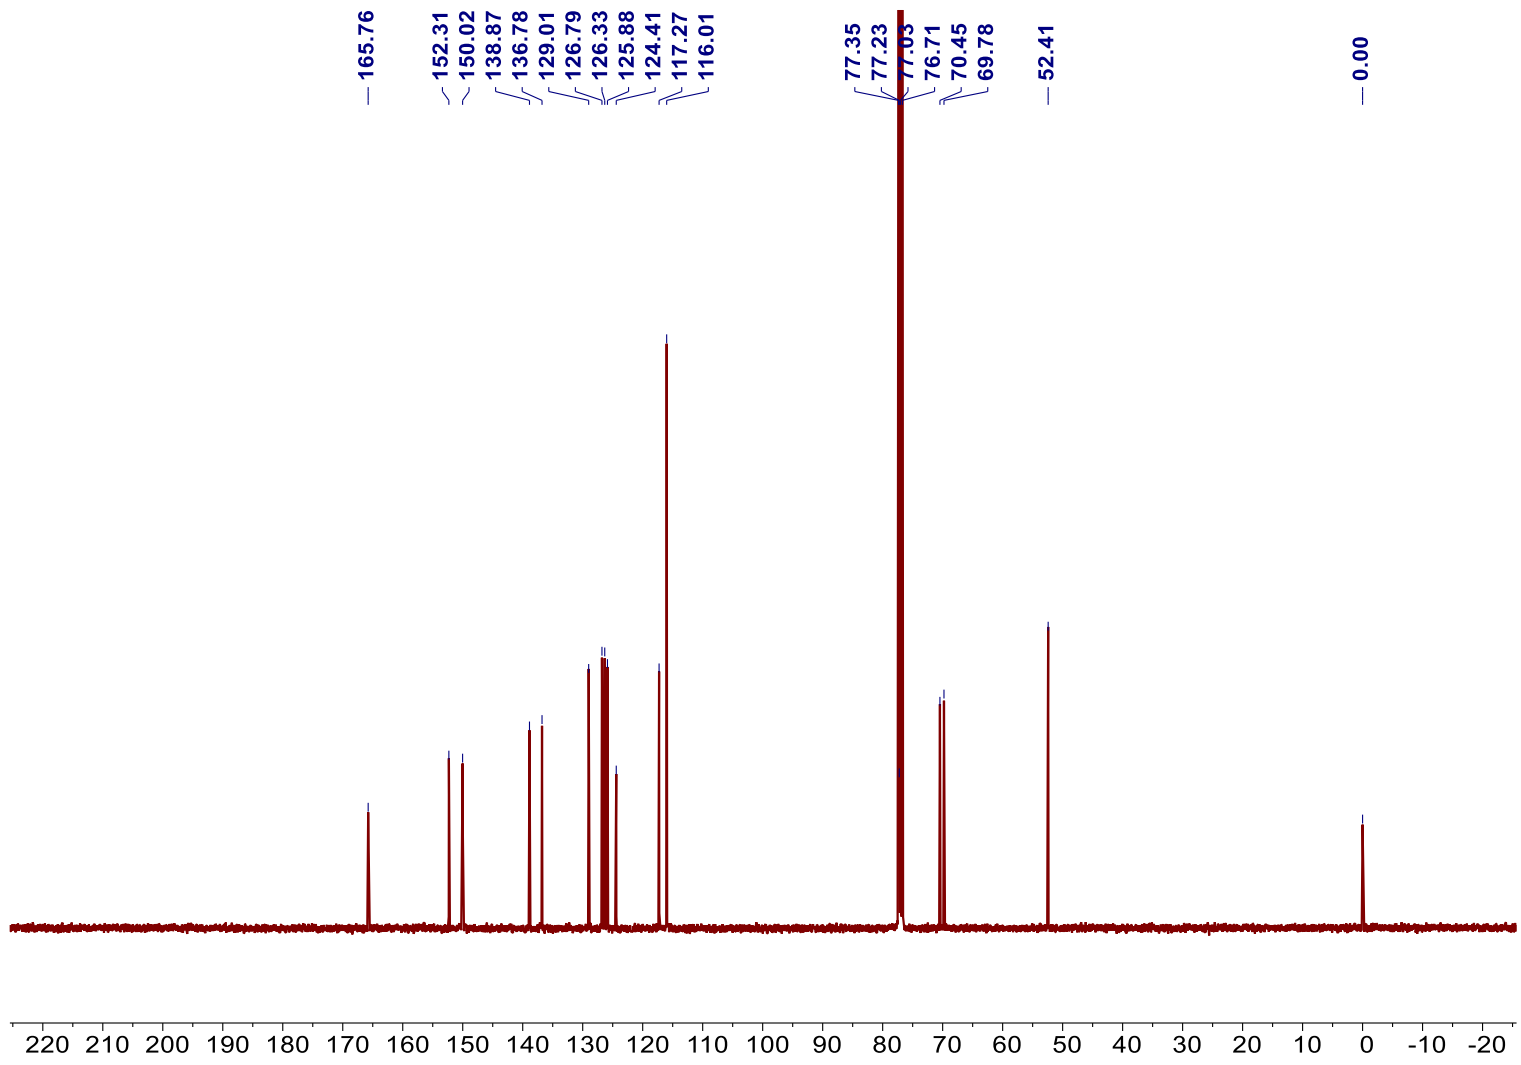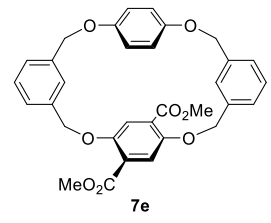

<sup>13</sup>C NMR  
CDCl<sub>3</sub>

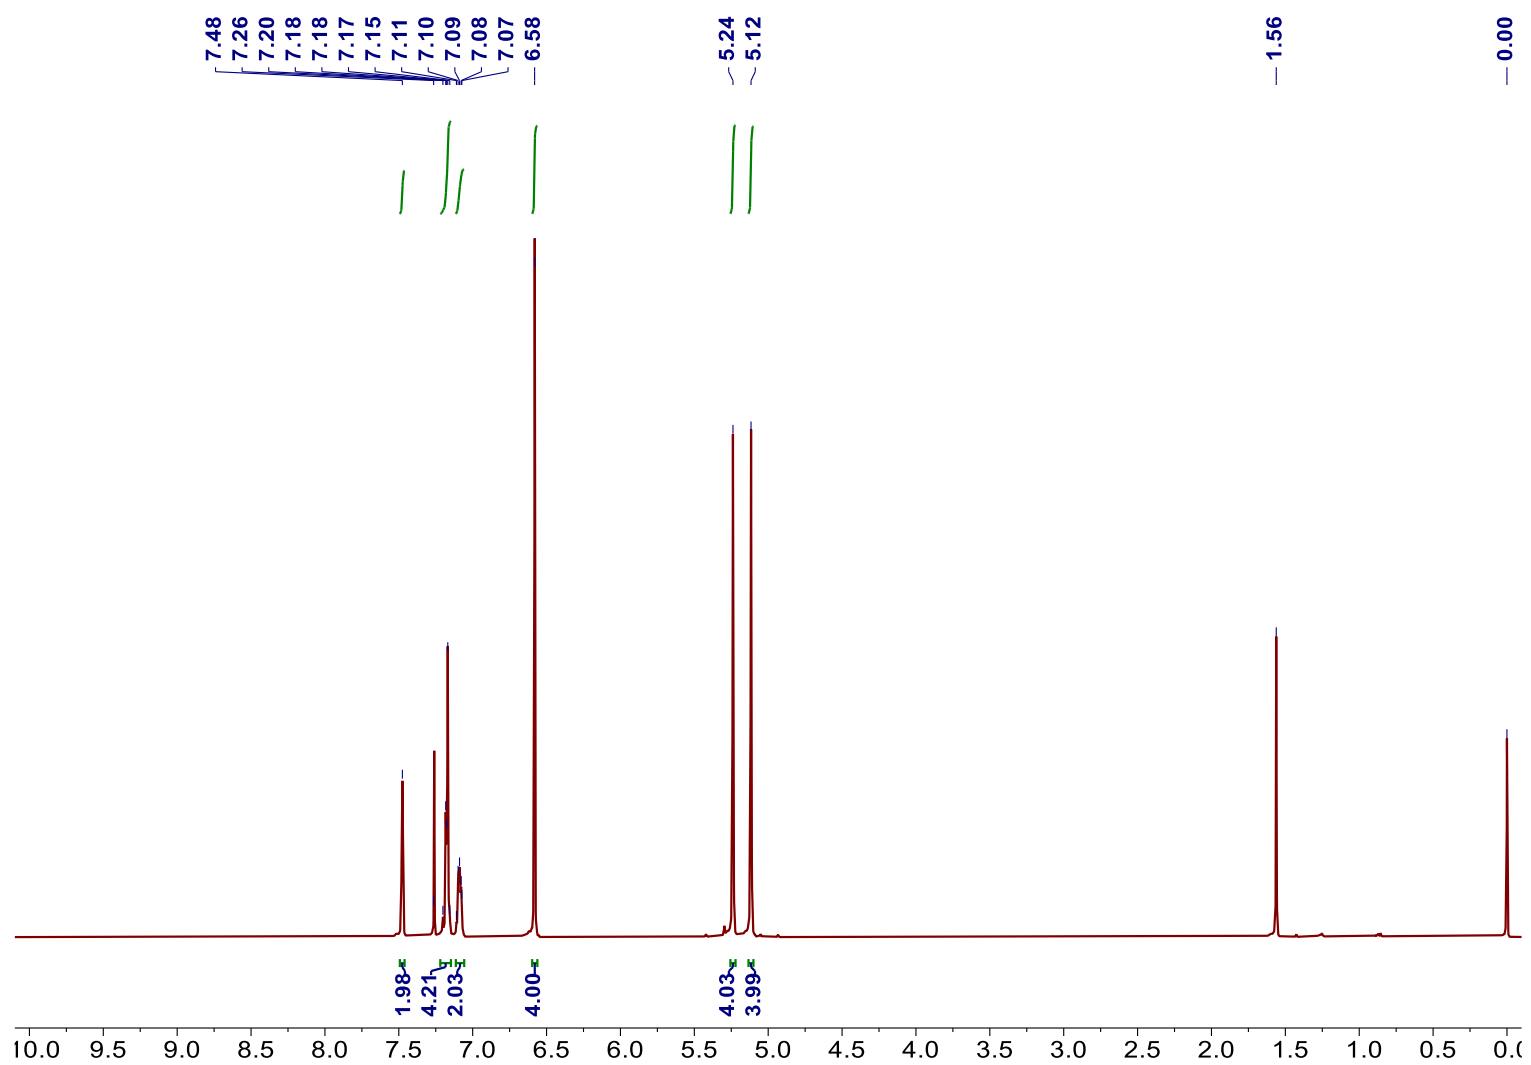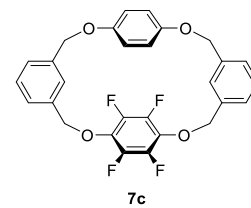

$^1\text{H NMR}$   
 $\text{CDCl}_3$

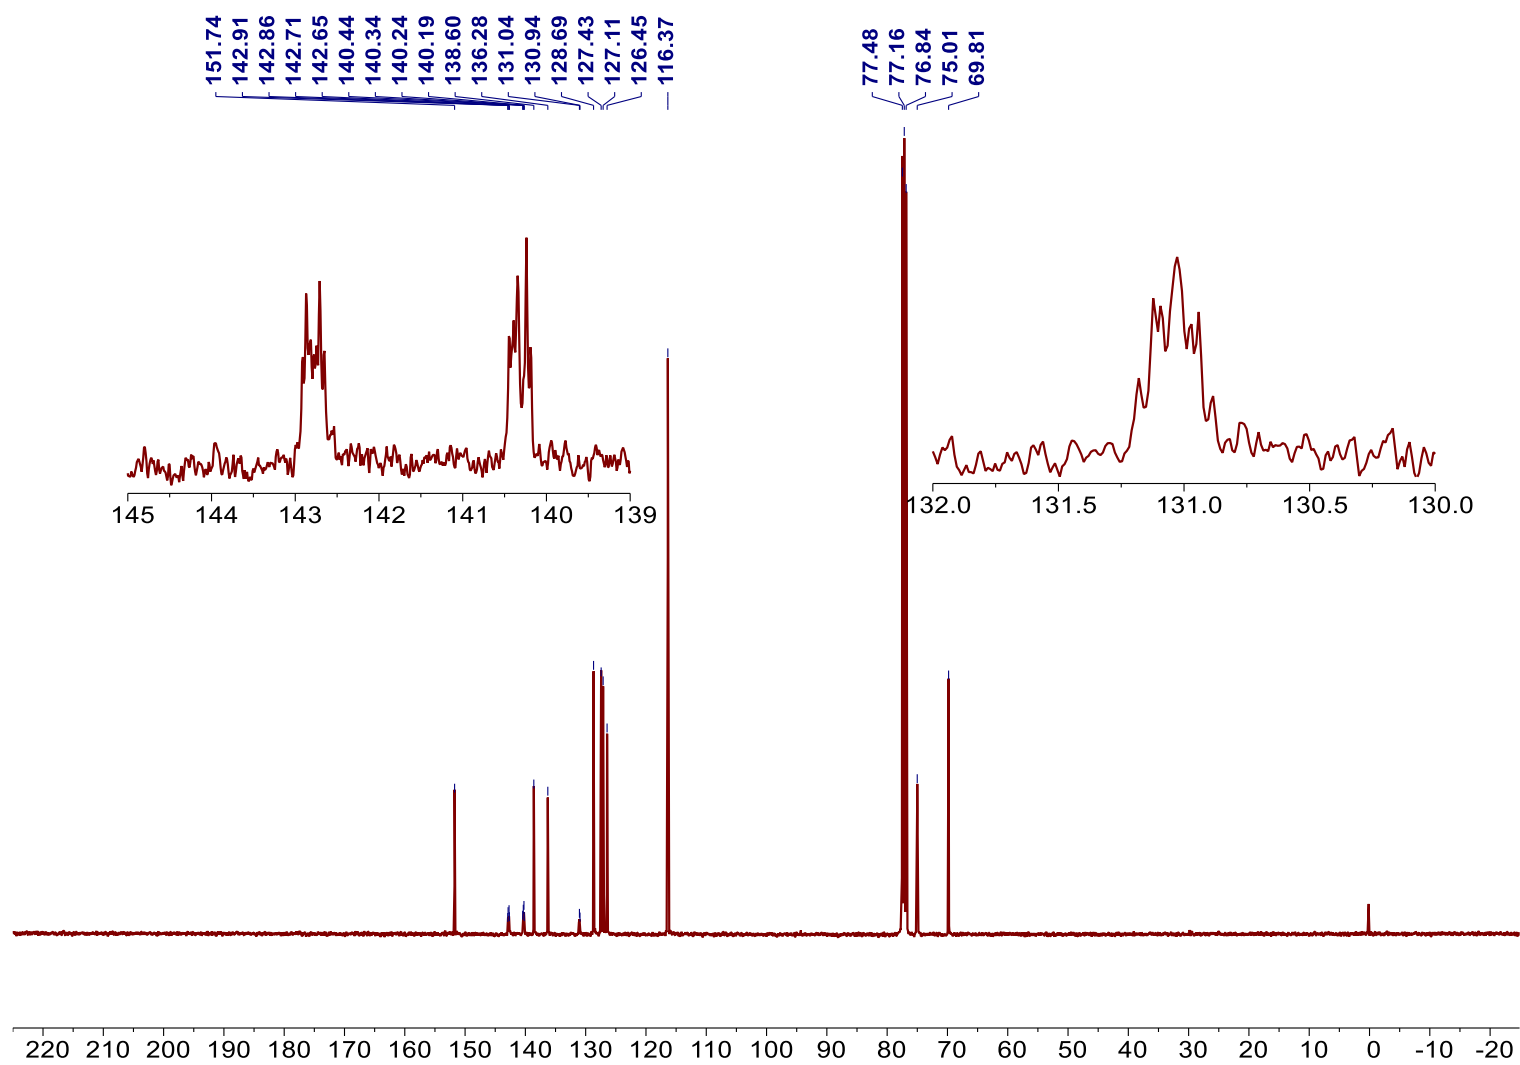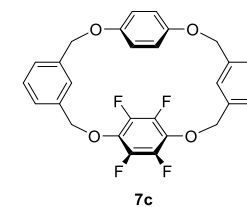

<sup>13</sup>C NMR  
CDCl<sub>3</sub>

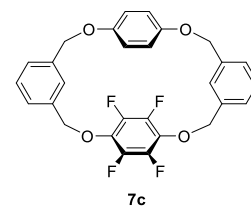

$^{19}\text{F}$  NMR  
 $\text{CDCl}_3$

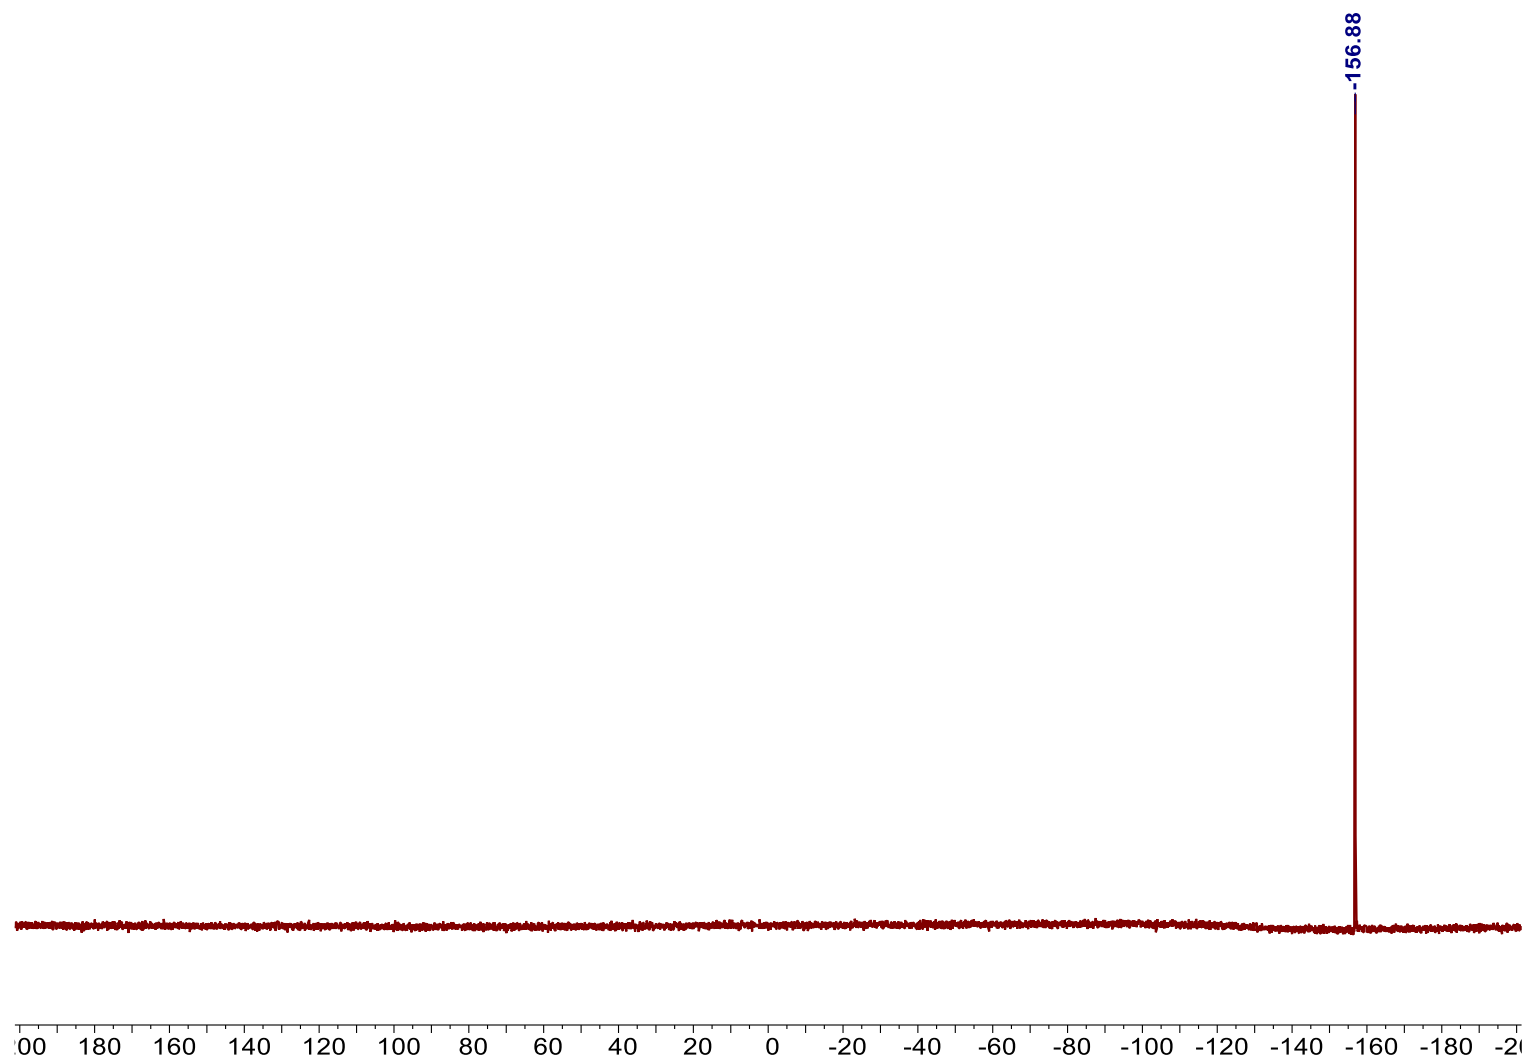

S110

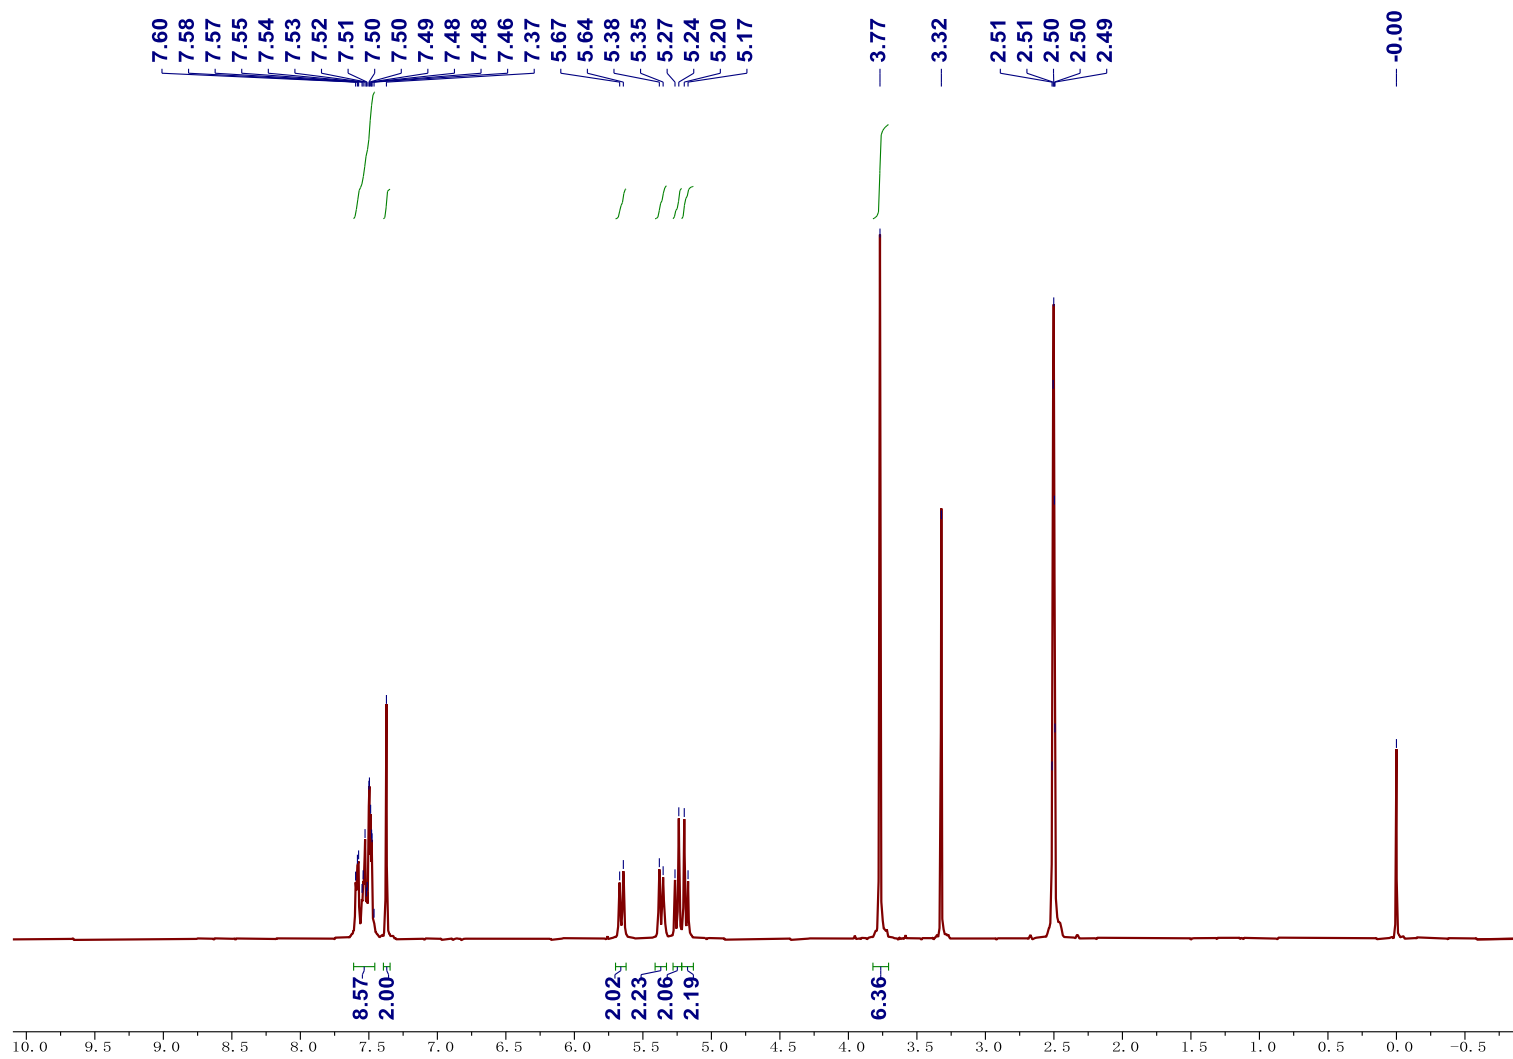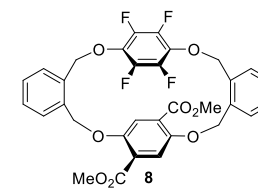

<sup>1</sup>H NMR  
DMSO-*d*<sub>6</sub>

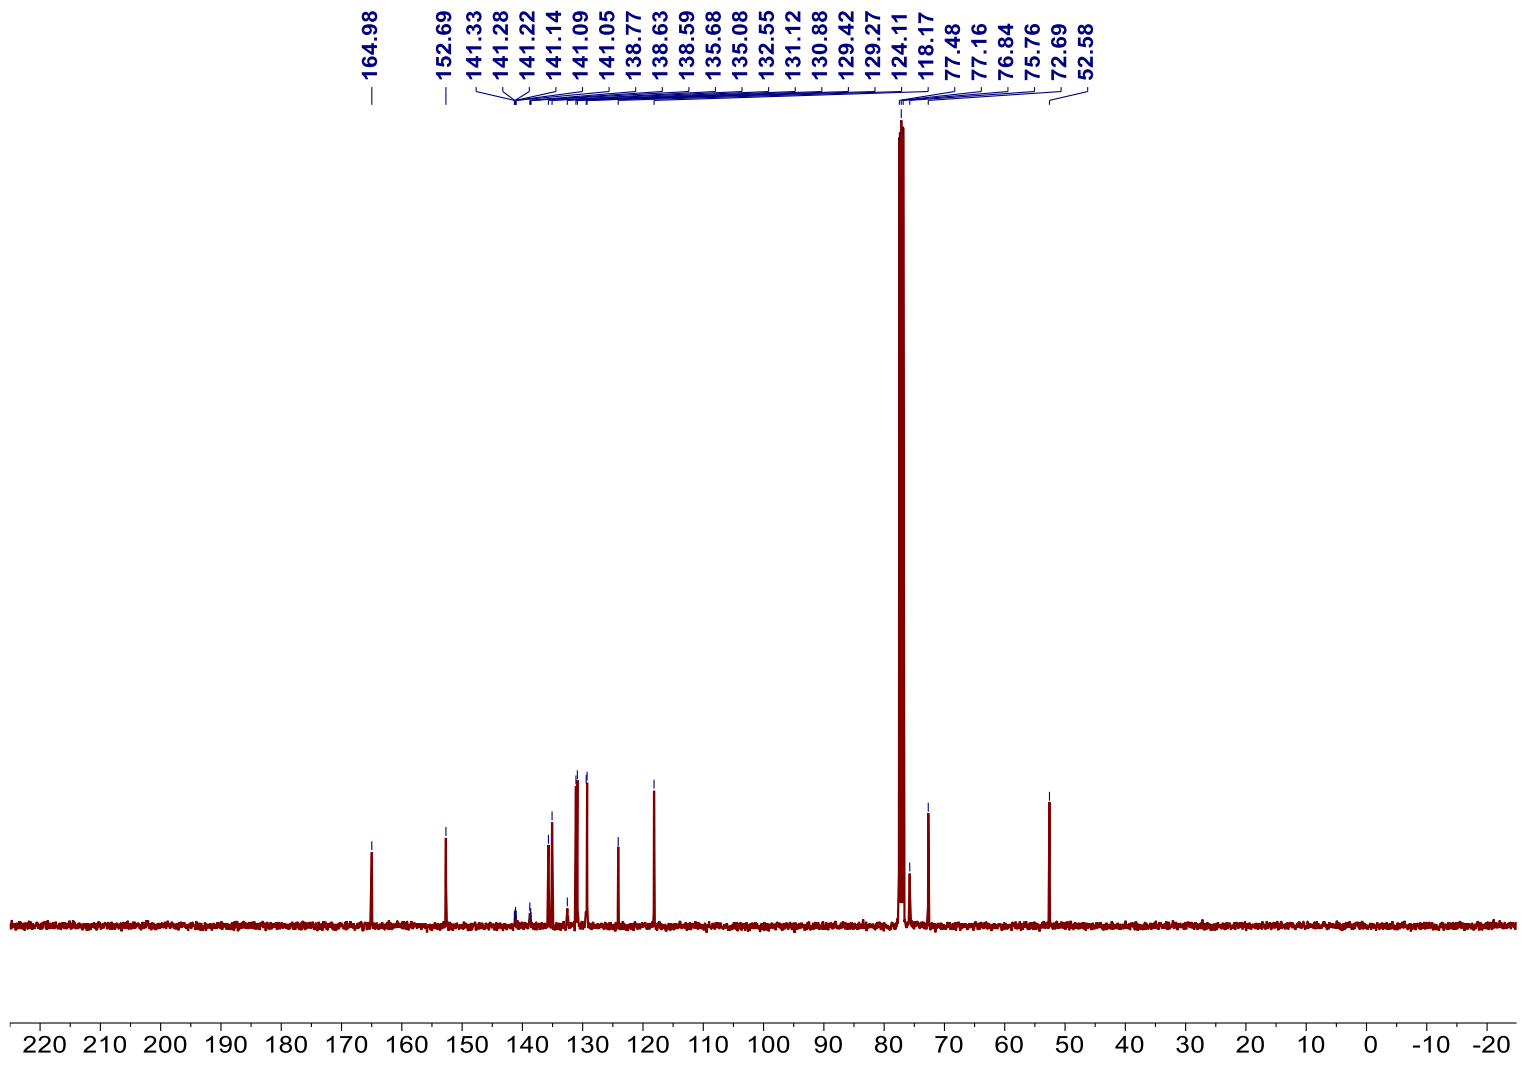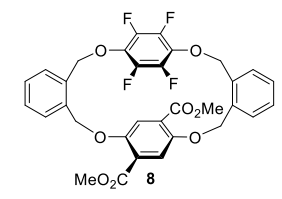

<sup>13</sup>C NMR  
CDCl<sub>3</sub>



— -157.51



<sup>19</sup>F NMR

DMSO-*d*<sub>6</sub> (120 °C)

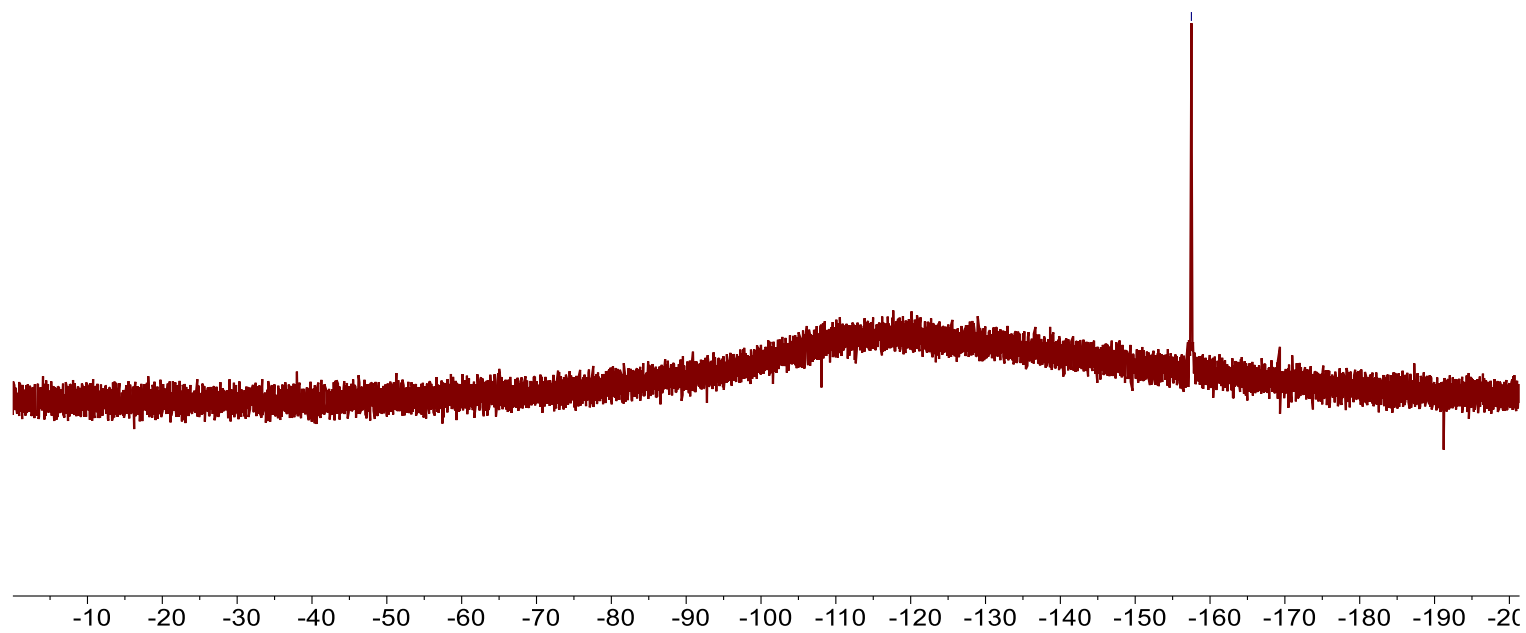

S113

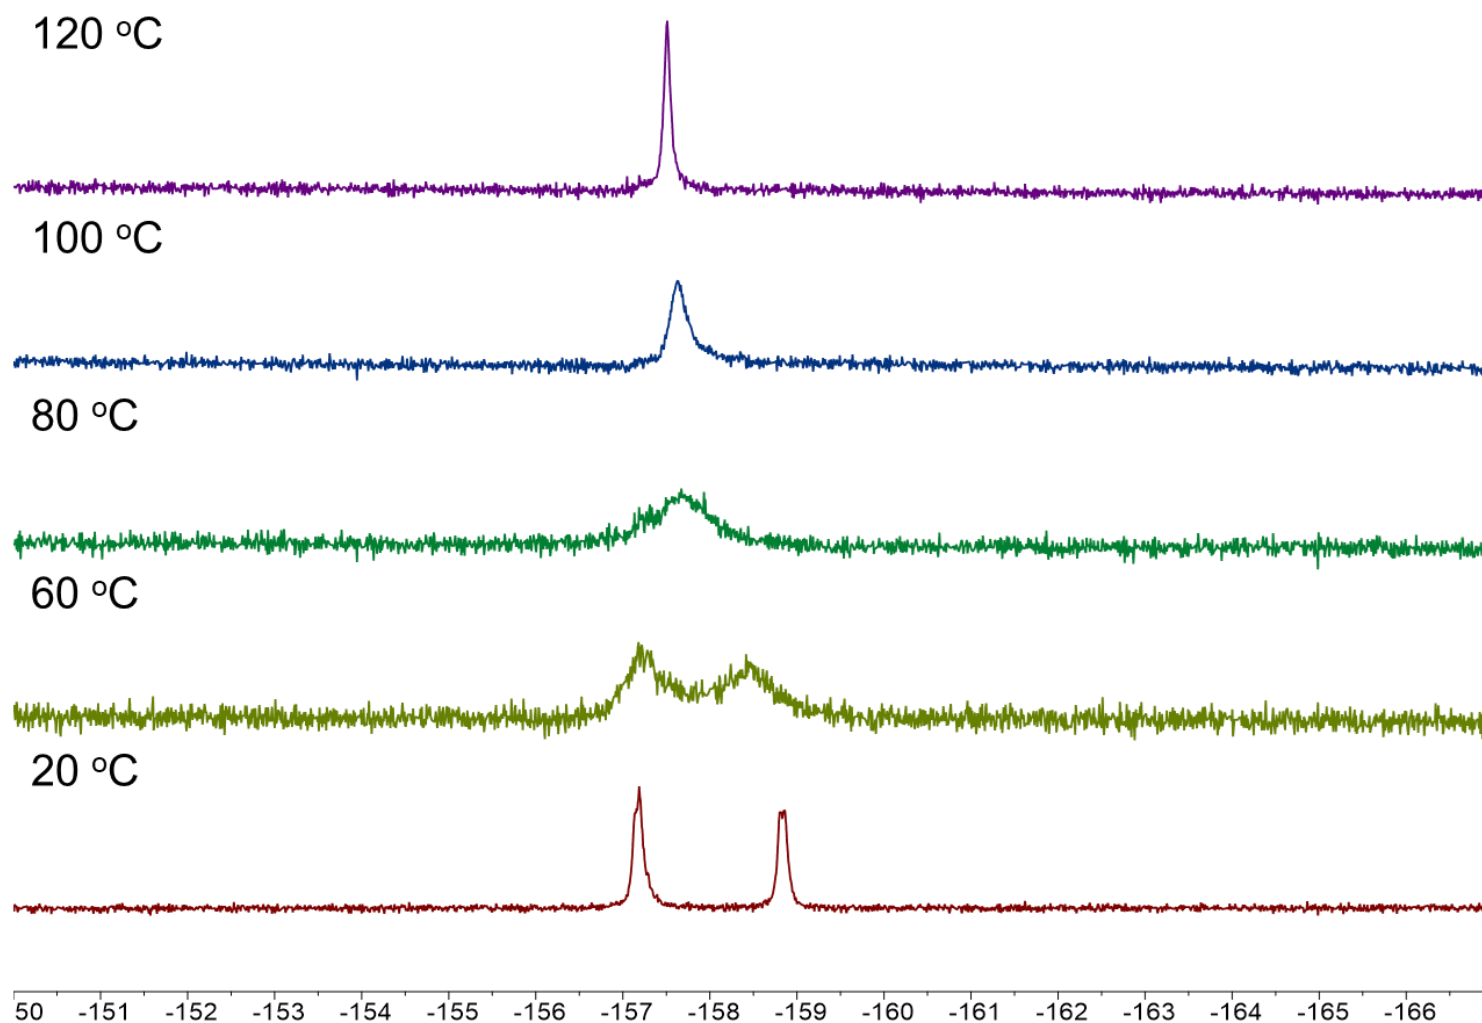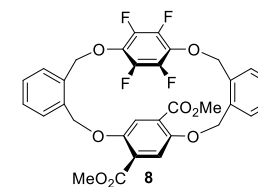

VT  $^{19}\text{F}$  NMR

DMSO- $d_6$

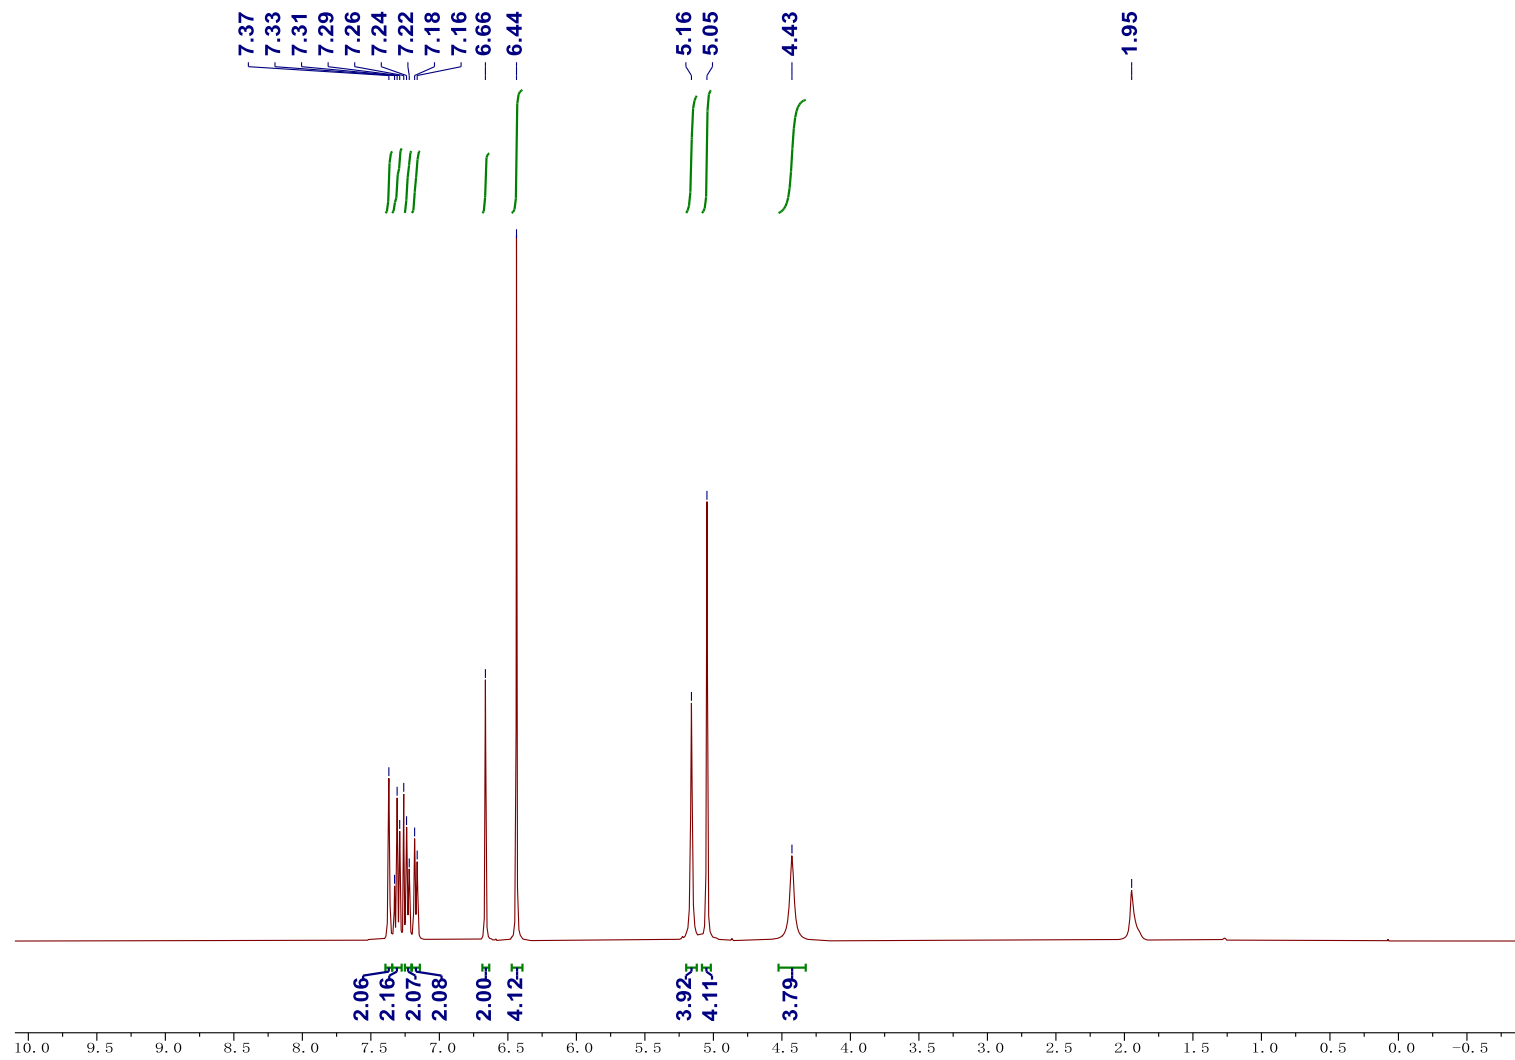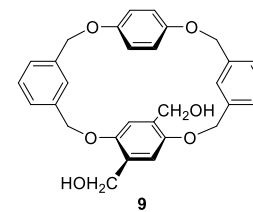

$^1\text{H NMR}$

$\text{CDCl}_3$

152.48  
148.68  
138.88  
137.87  
129.40  
129.07  
126.90  
125.91  
125.39  
116.08  
112.92

77.48  
77.16  
76.84  
70.35  
69.21  
61.76



$^{13}\text{C}$  NMR

$\text{CDCl}_3$

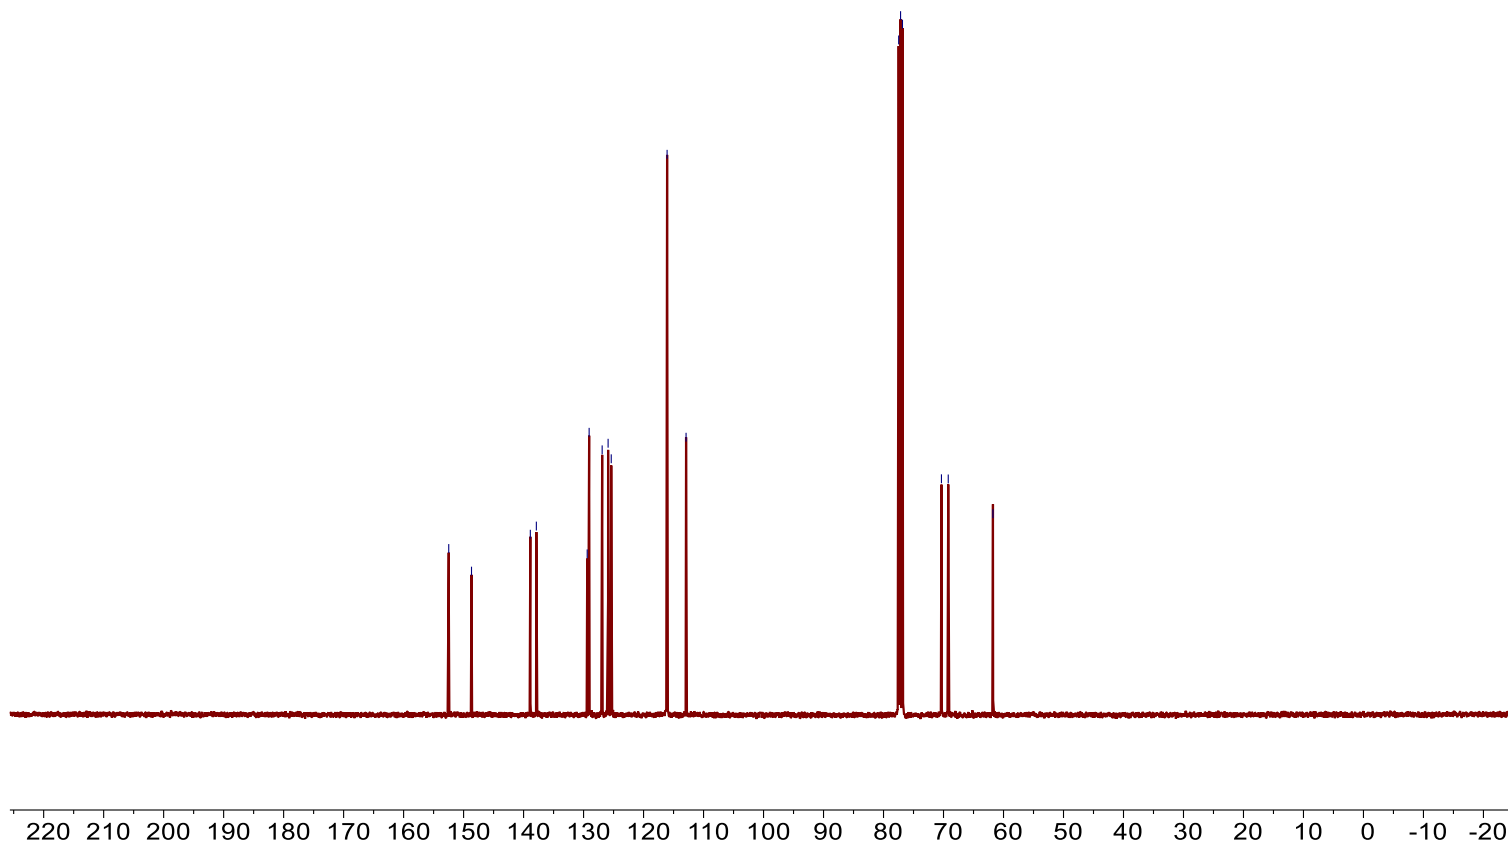

S116

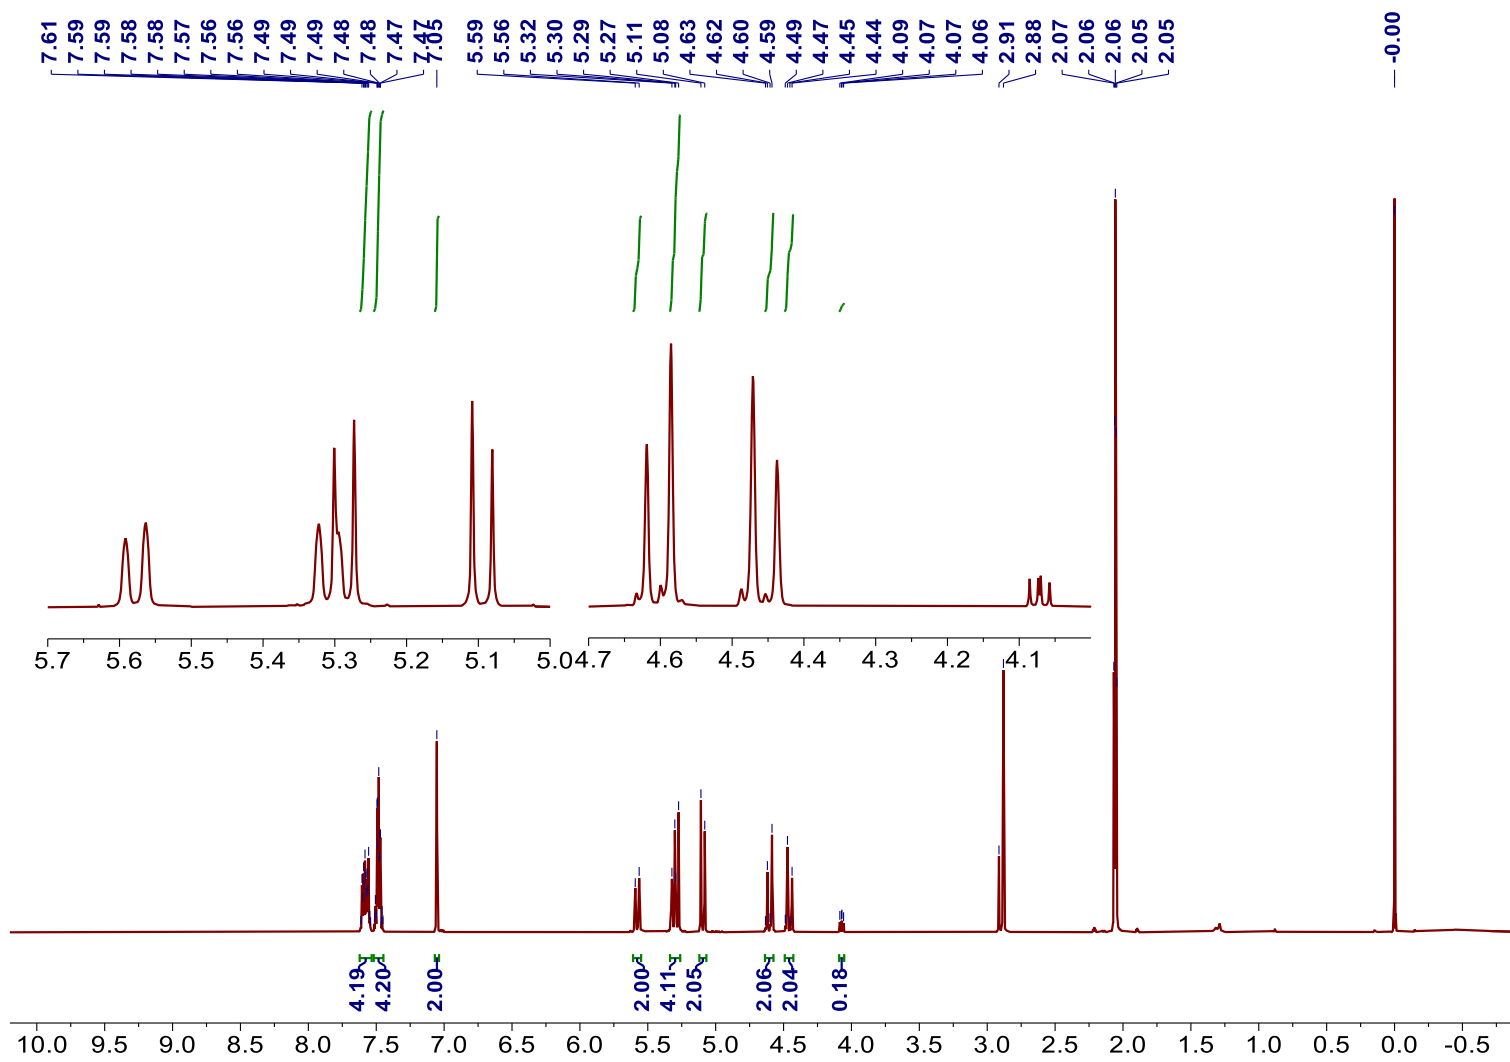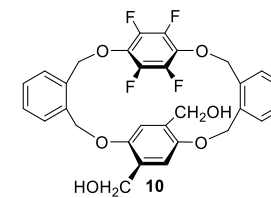

<sup>1</sup>H NMR  
acetone-*d*<sub>6</sub>

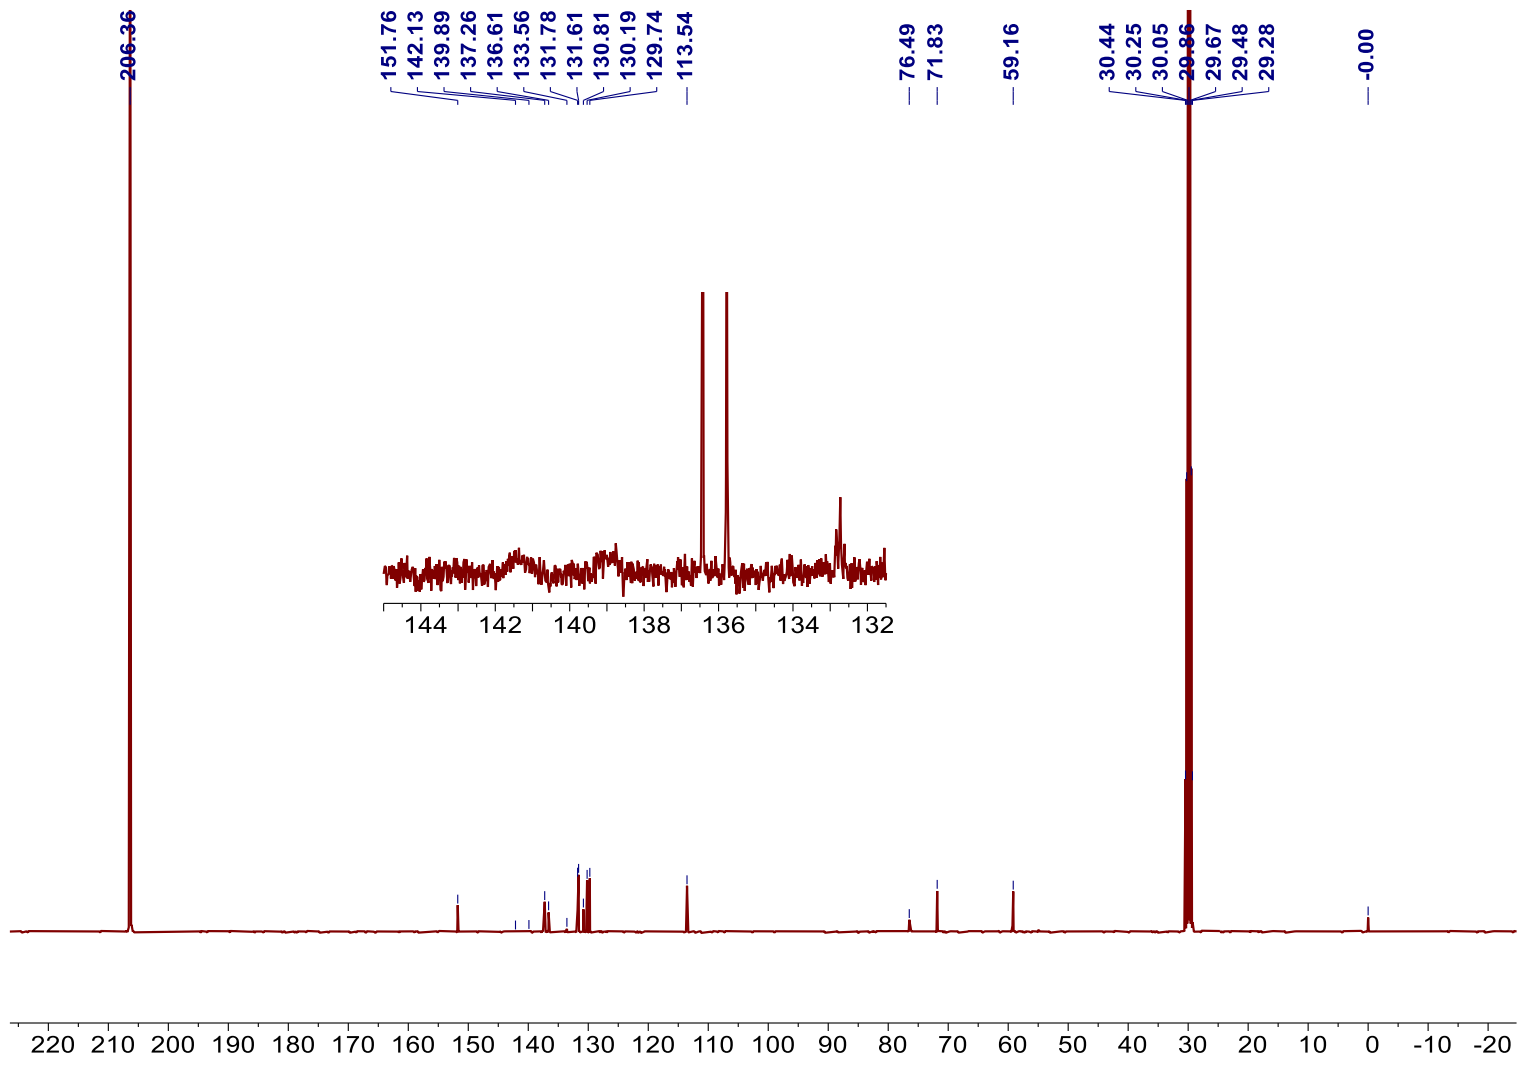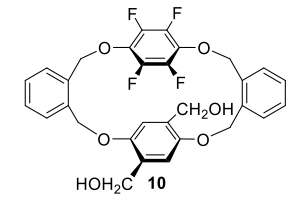

<sup>13</sup>C NMR  
acetone-*d*<sub>6</sub>

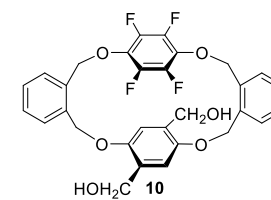

<sup>19</sup>F NMR

DMSO-*d*<sub>6</sub> (120 °C)

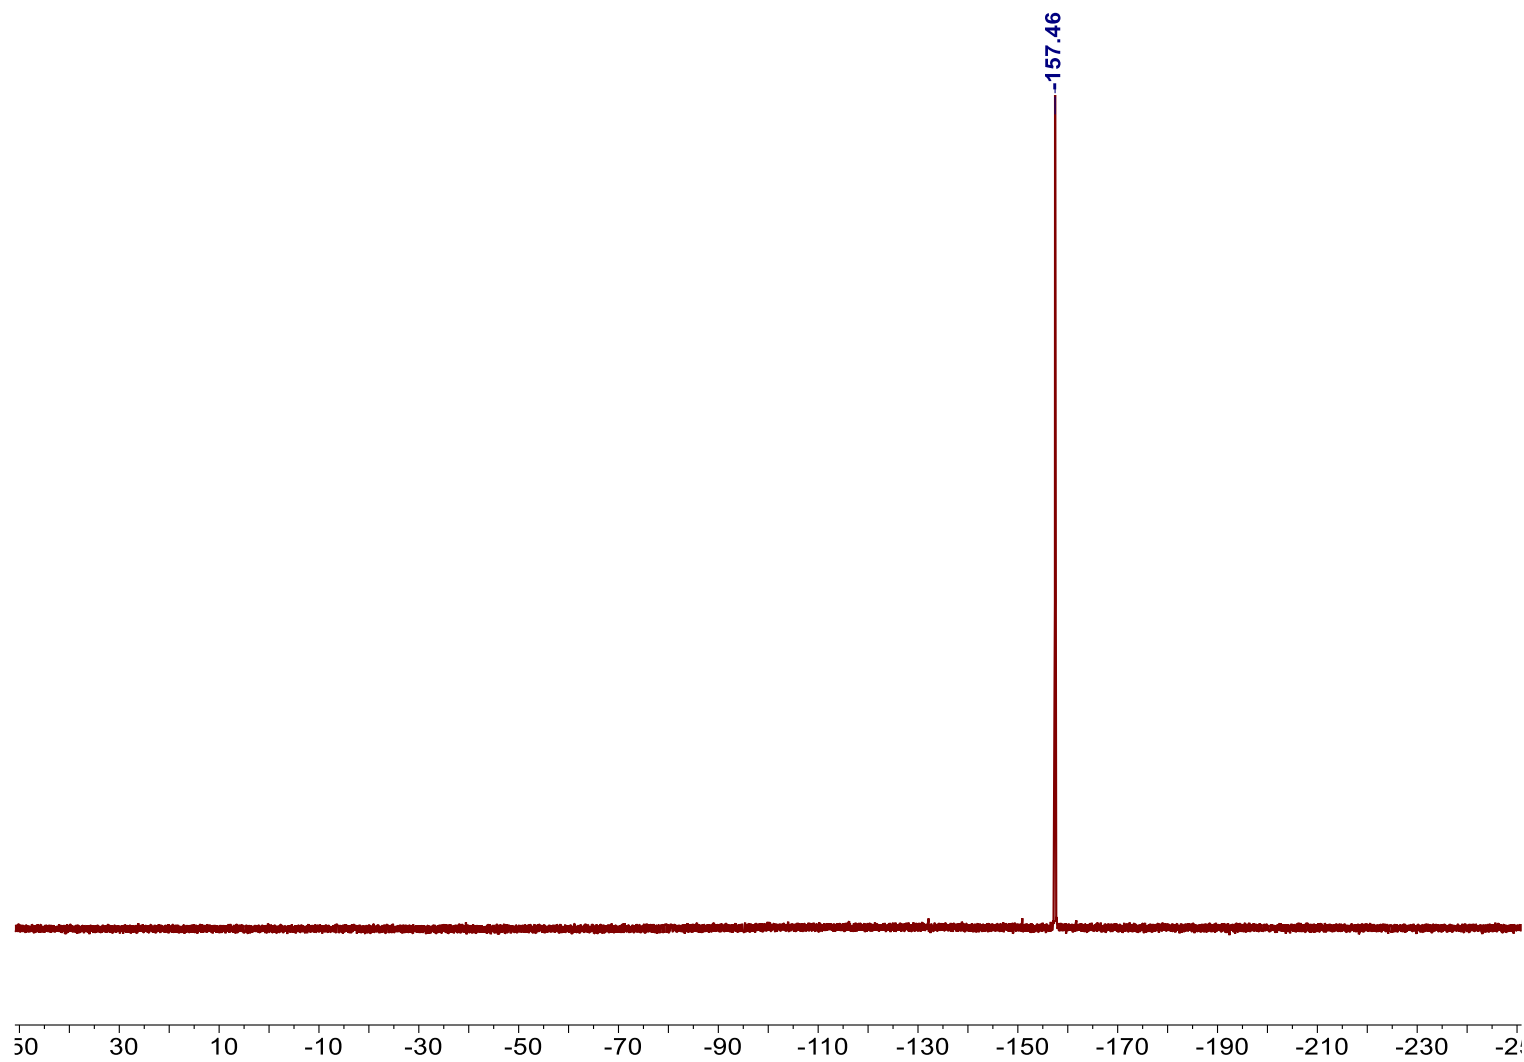

S119

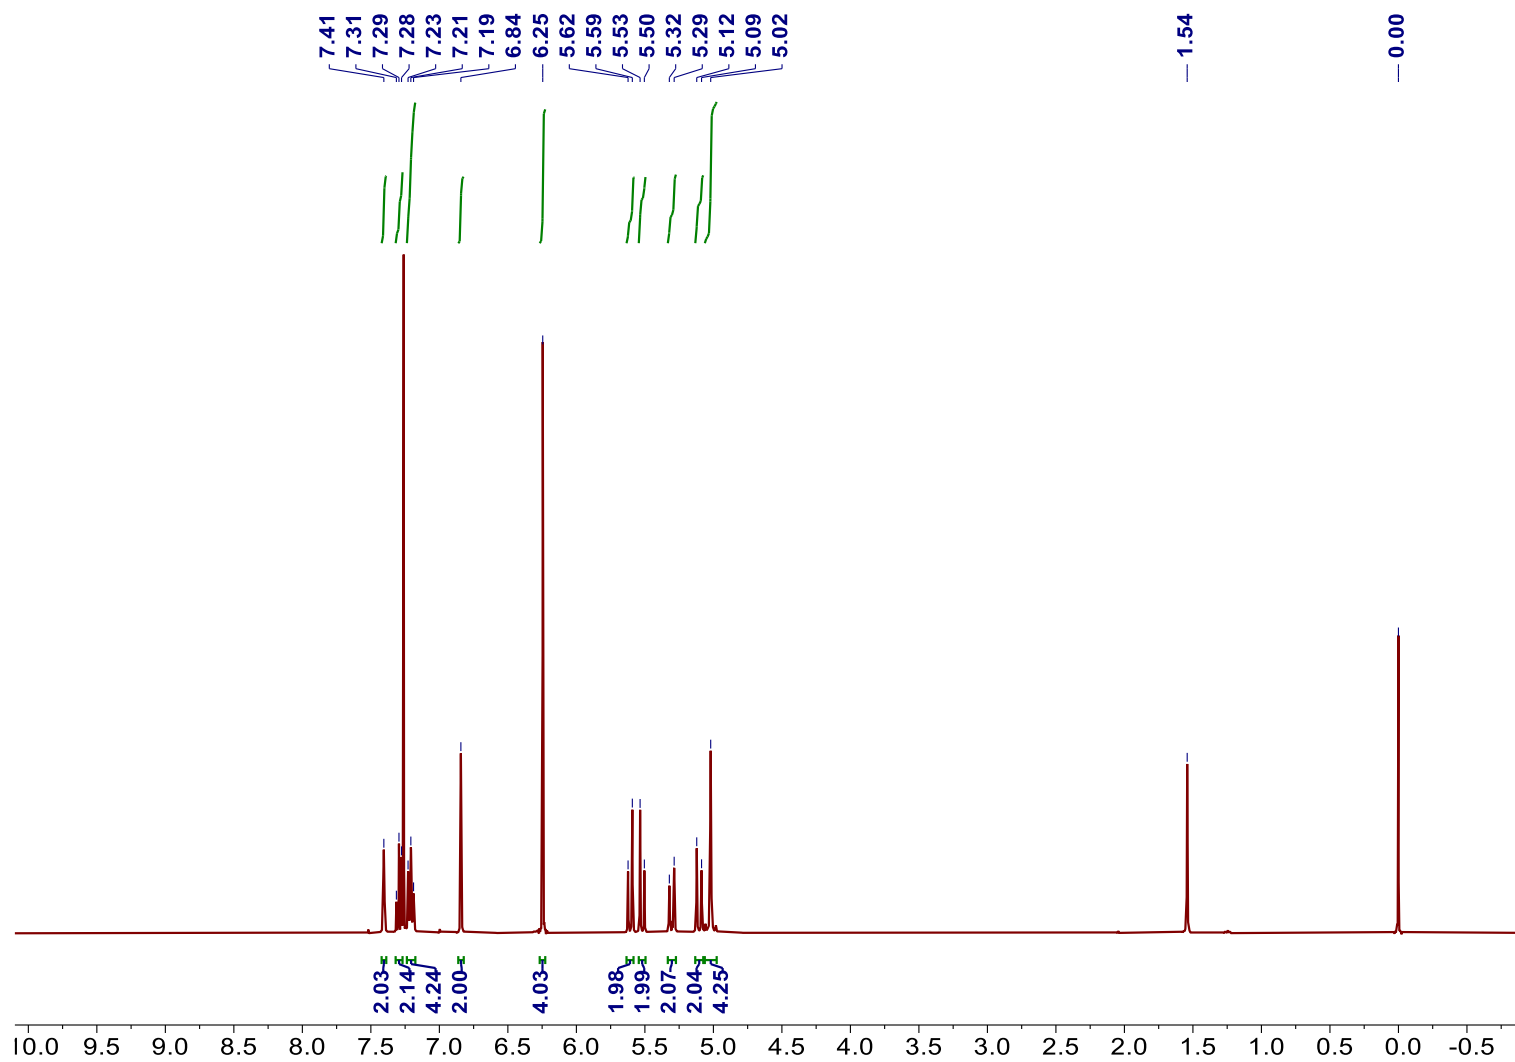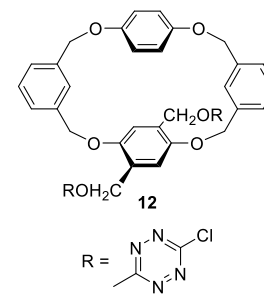

$^1\text{H NMR}$   
 $\text{CDCl}_3$



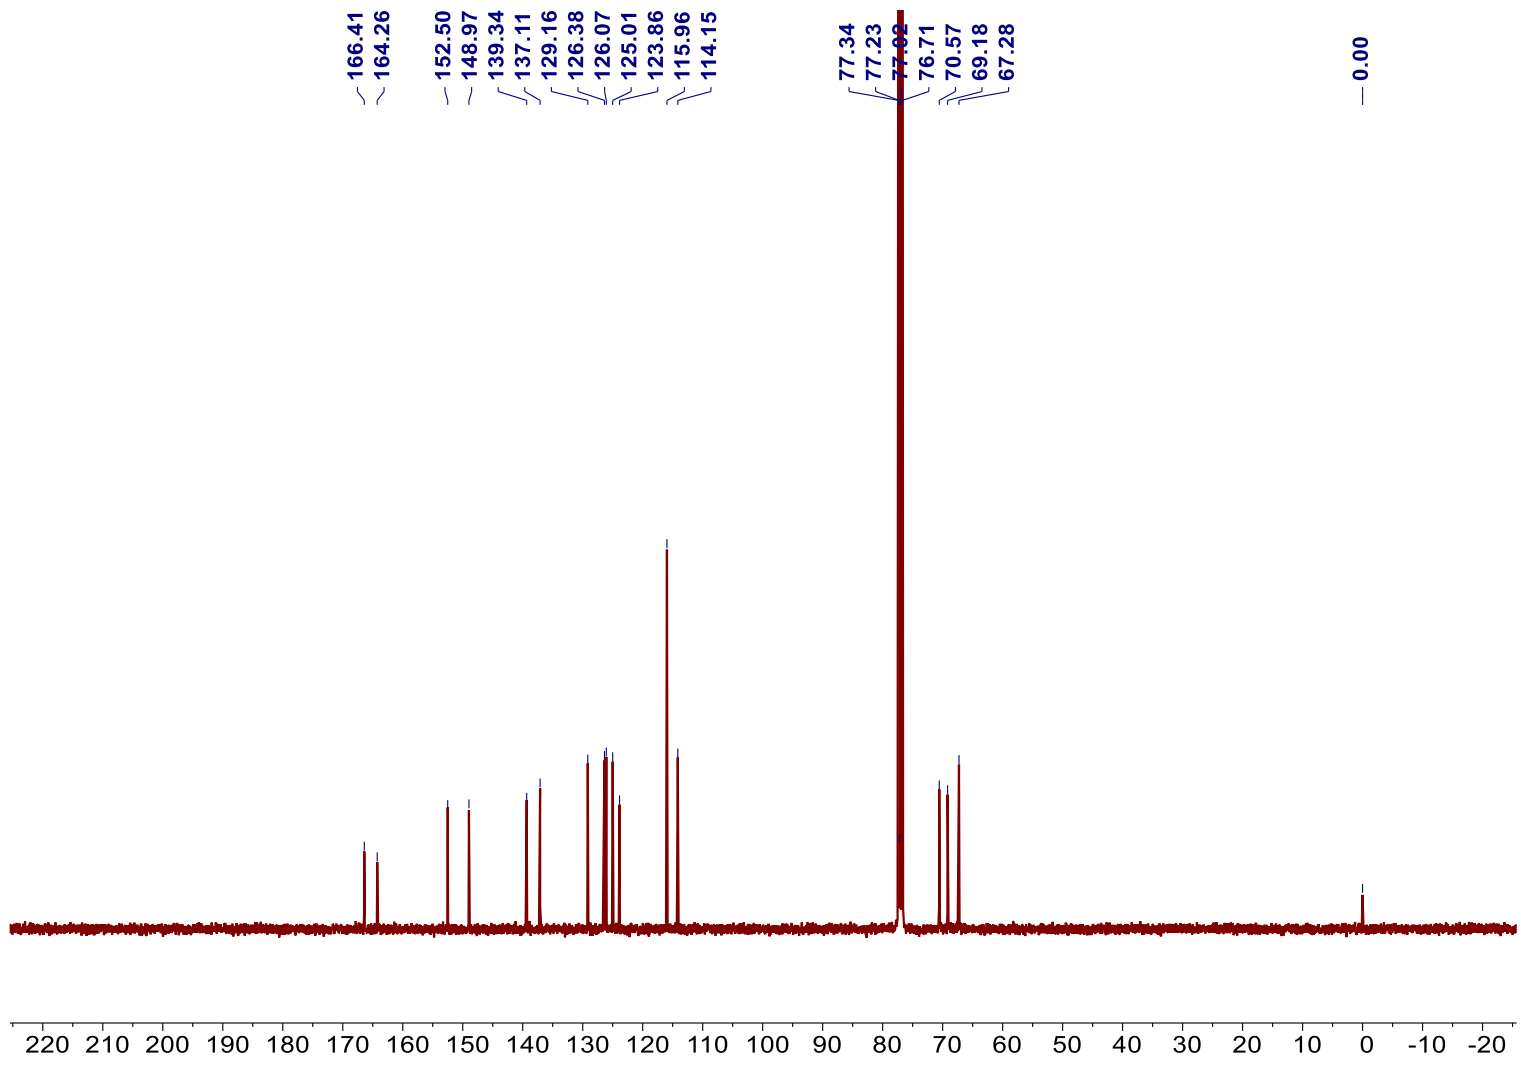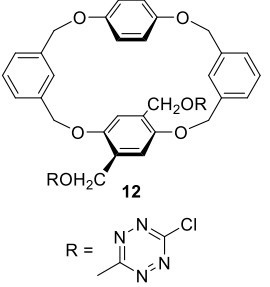

<sup>13</sup>C NMR  
CDCl<sub>3</sub>

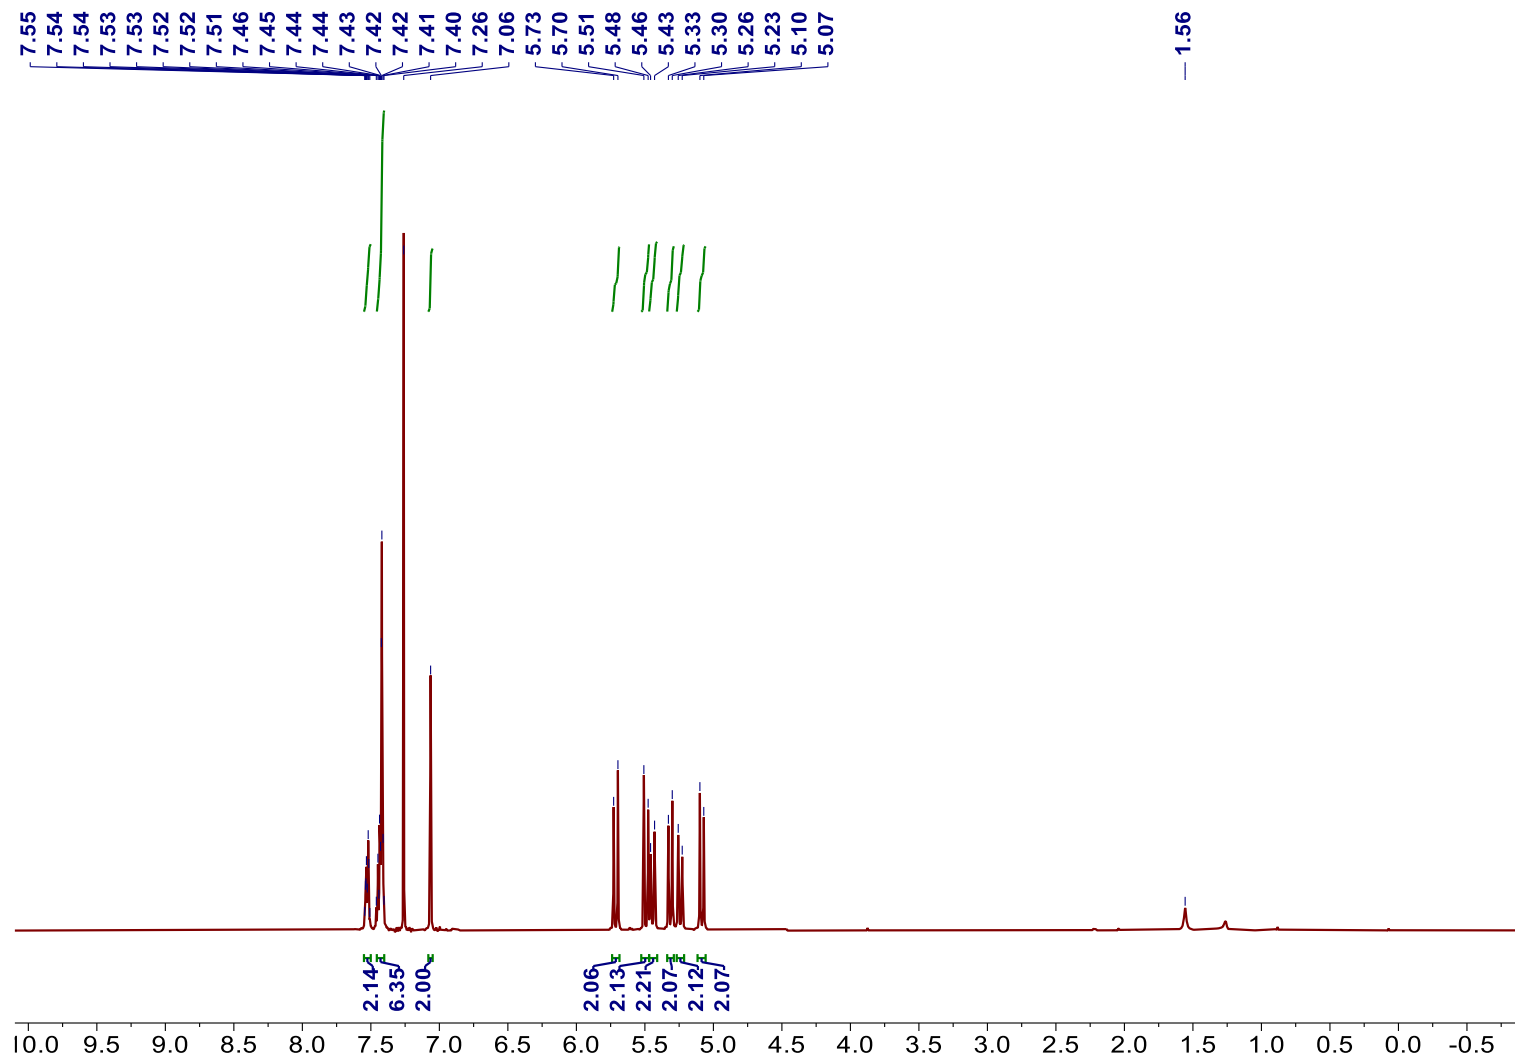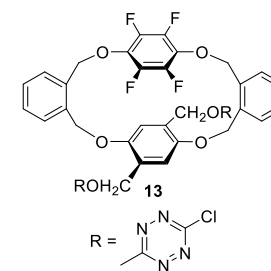

<sup>1</sup>H NMR  
CDCl<sub>3</sub>

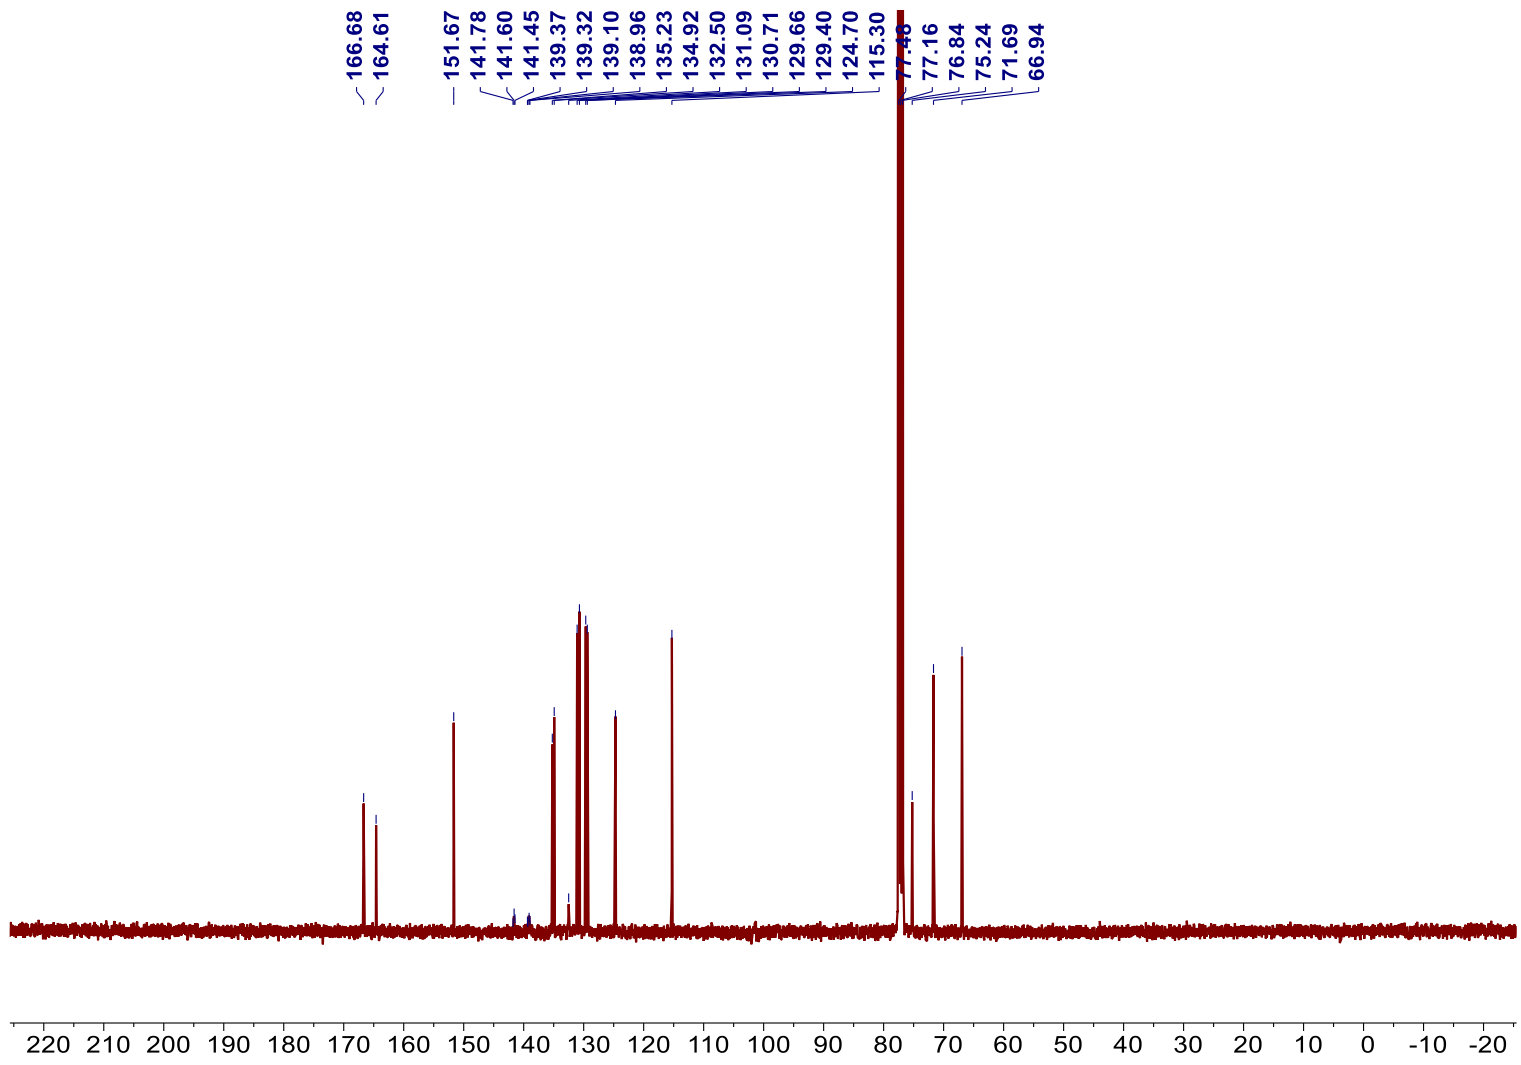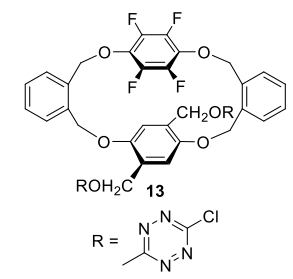

<sup>13</sup>C NMR  
CDCl<sub>3</sub>

200 180 160 140 120 100 80 60 40 20 0 -20 -40 -60 -80 -100 -120 -140 -160 -180 -200

-156.92



<sup>19</sup>F NMR  
CDCl<sub>3</sub>

S124

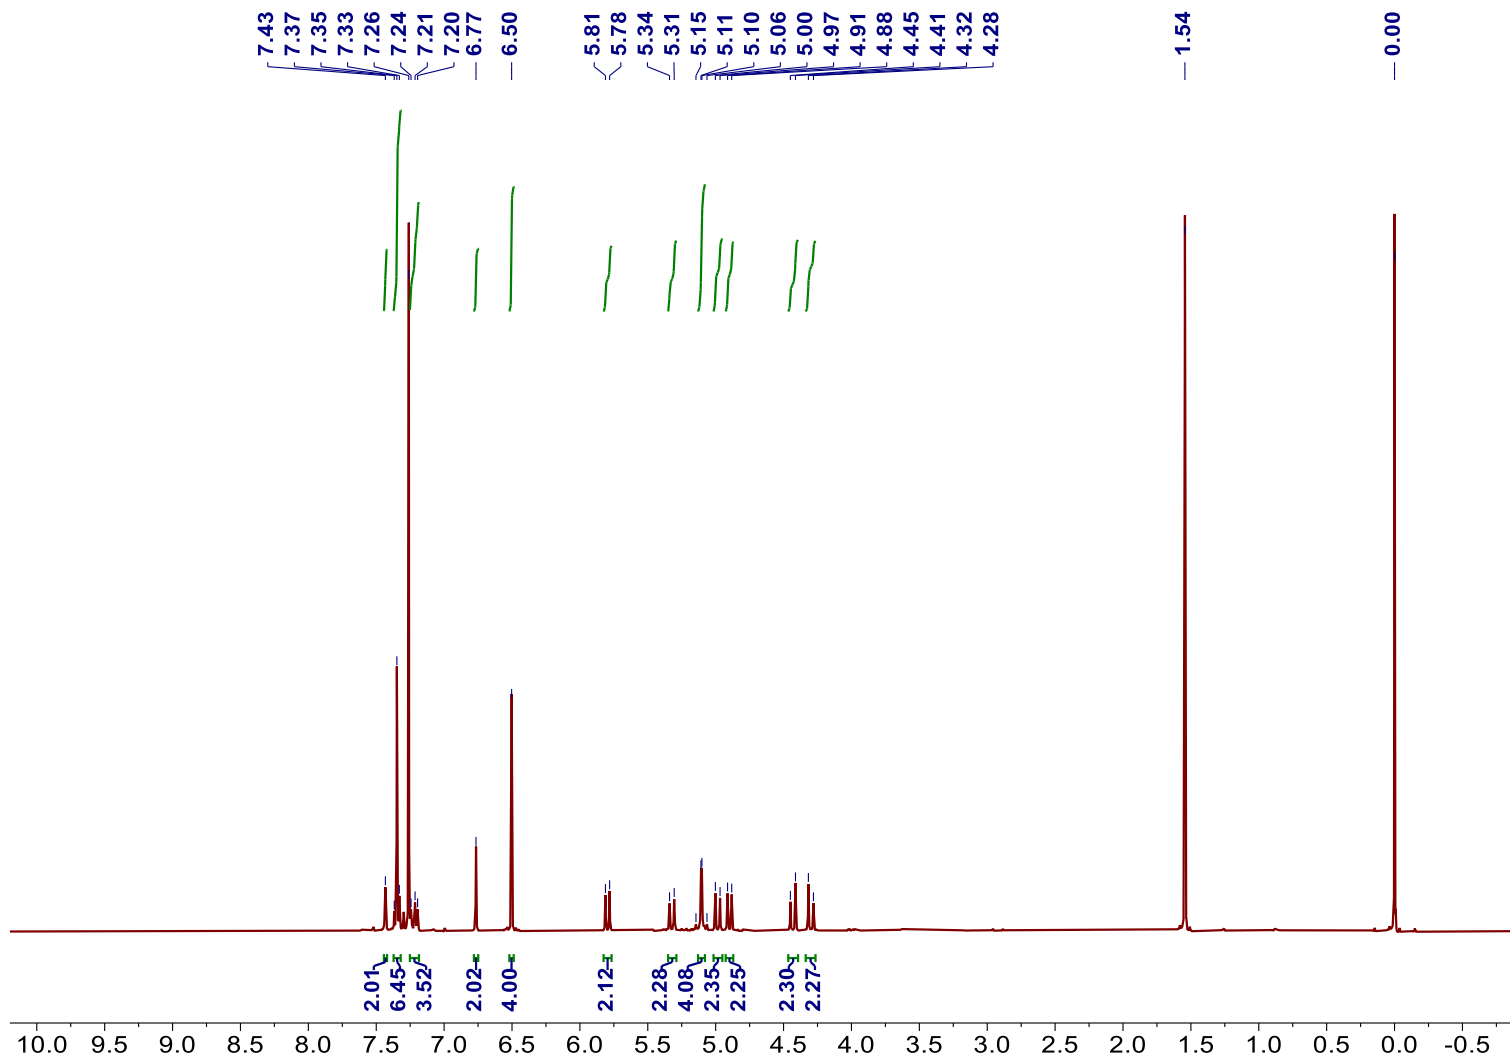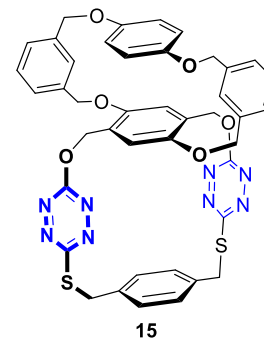

$^1\text{H NMR}$   
 $\text{CDCl}_3$

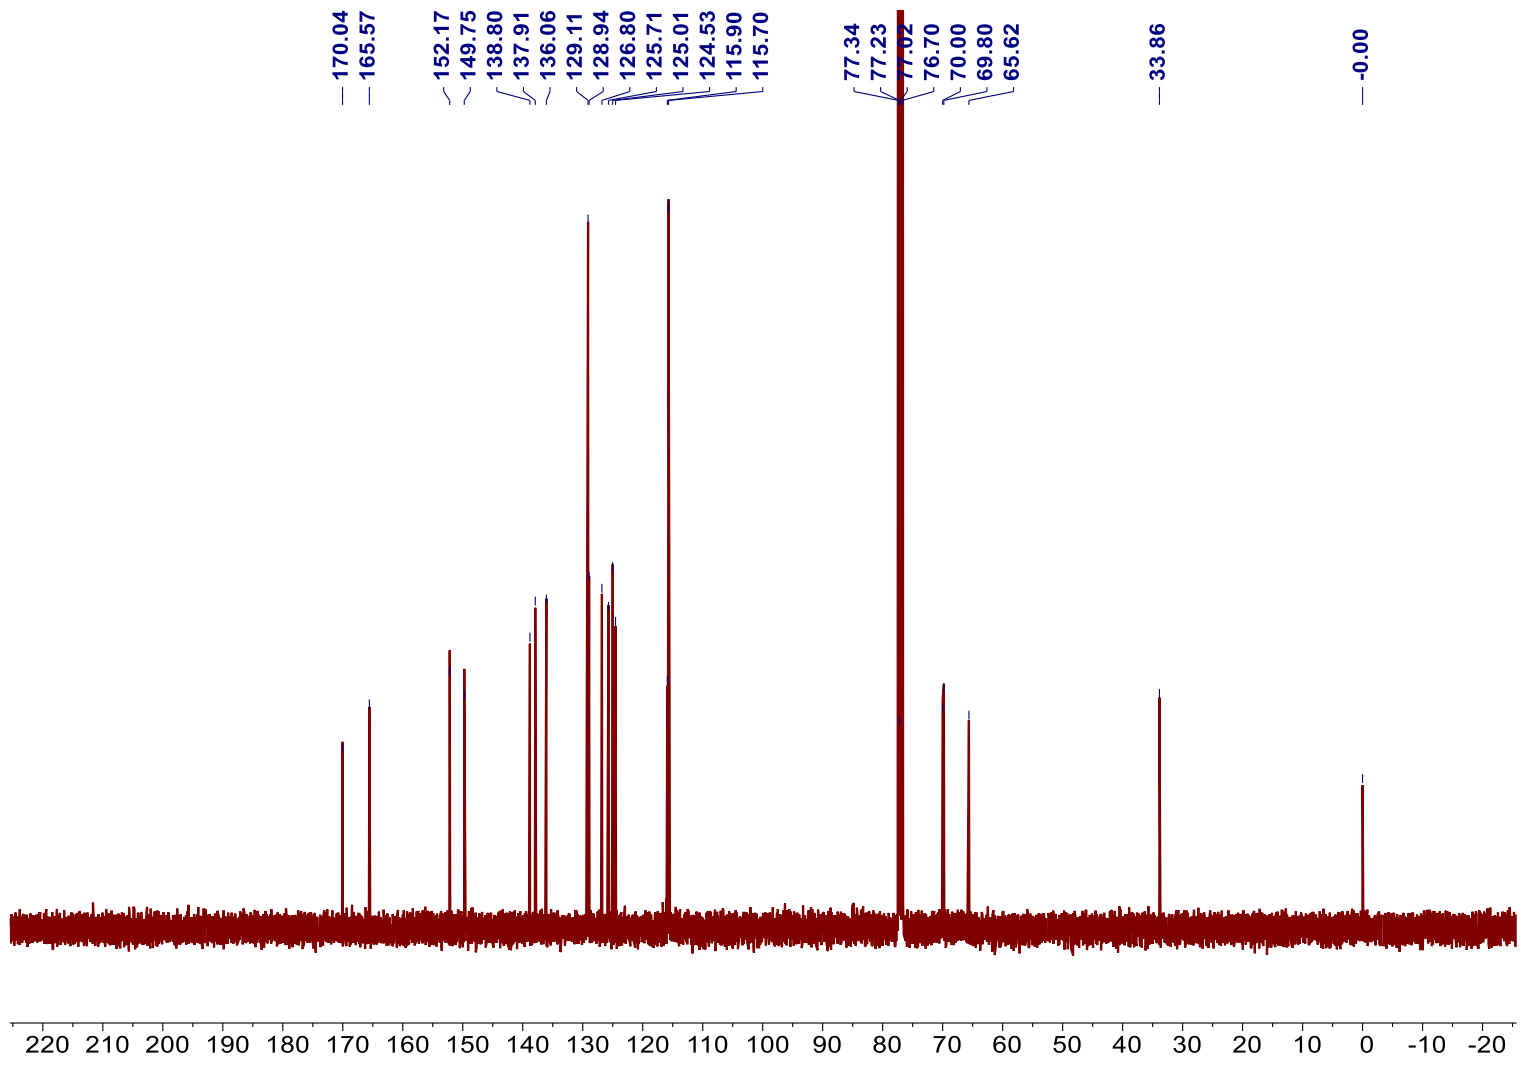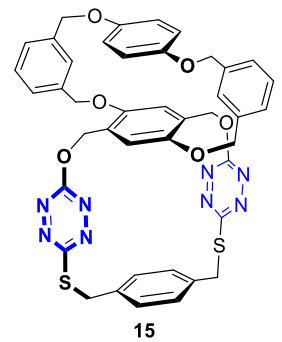

<sup>13</sup>C NMR  
CDCl<sub>3</sub>

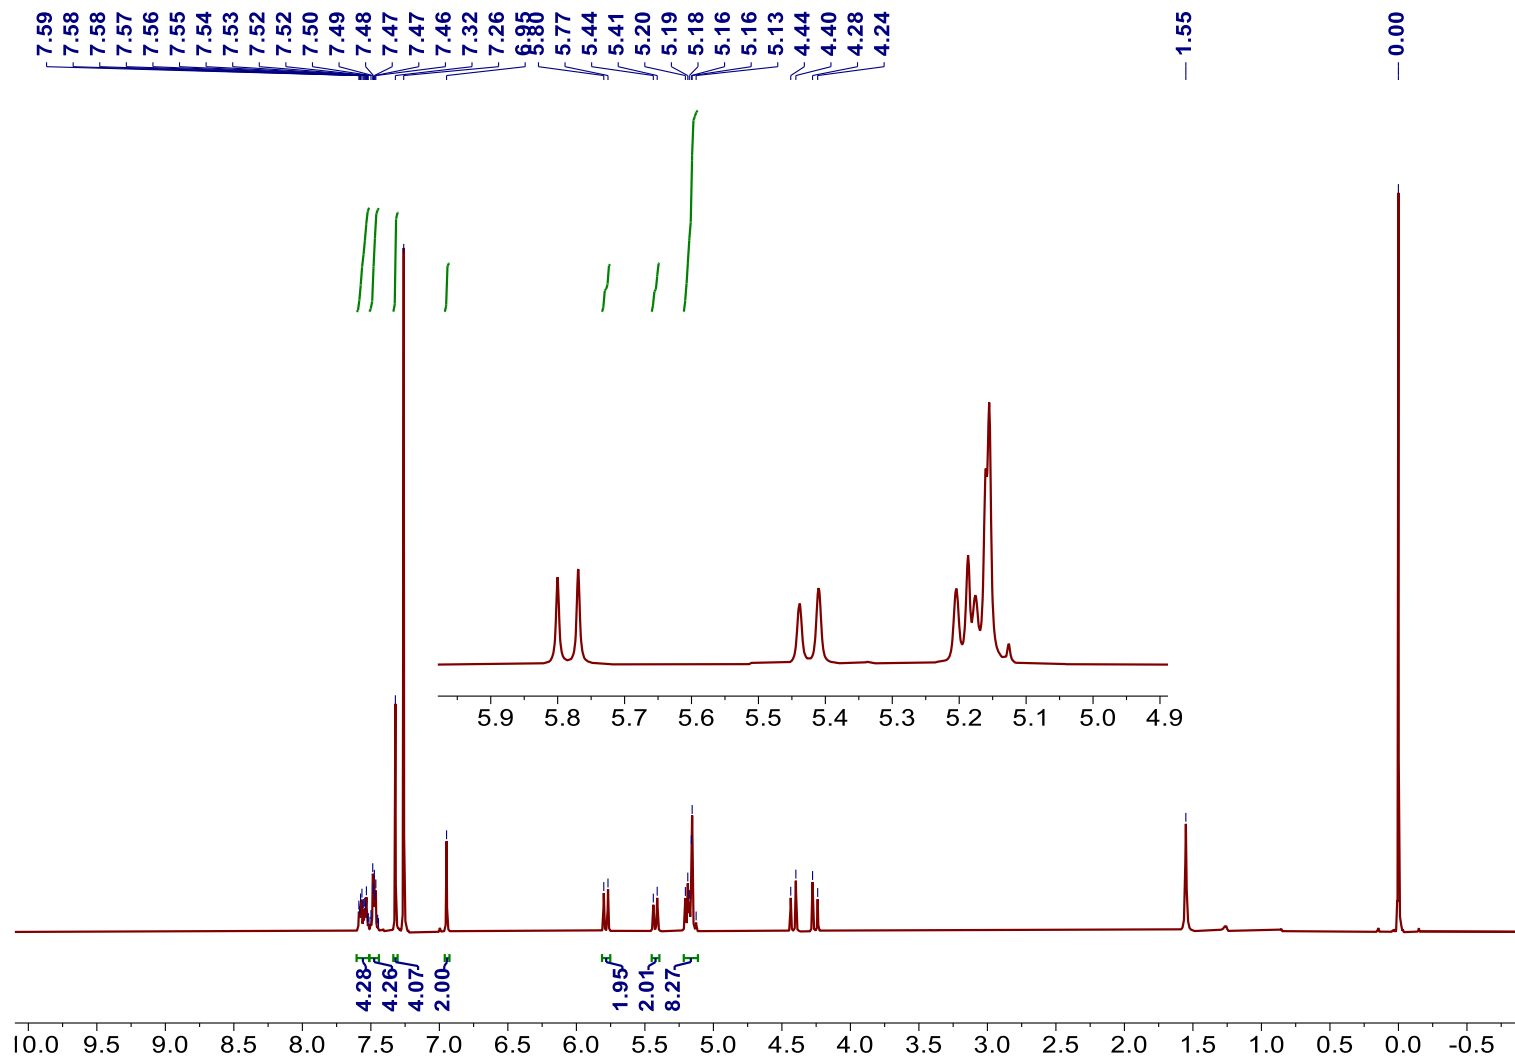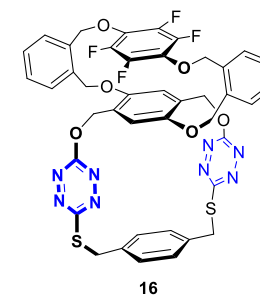

<sup>1</sup>H NMR  
CDCl<sub>3</sub>

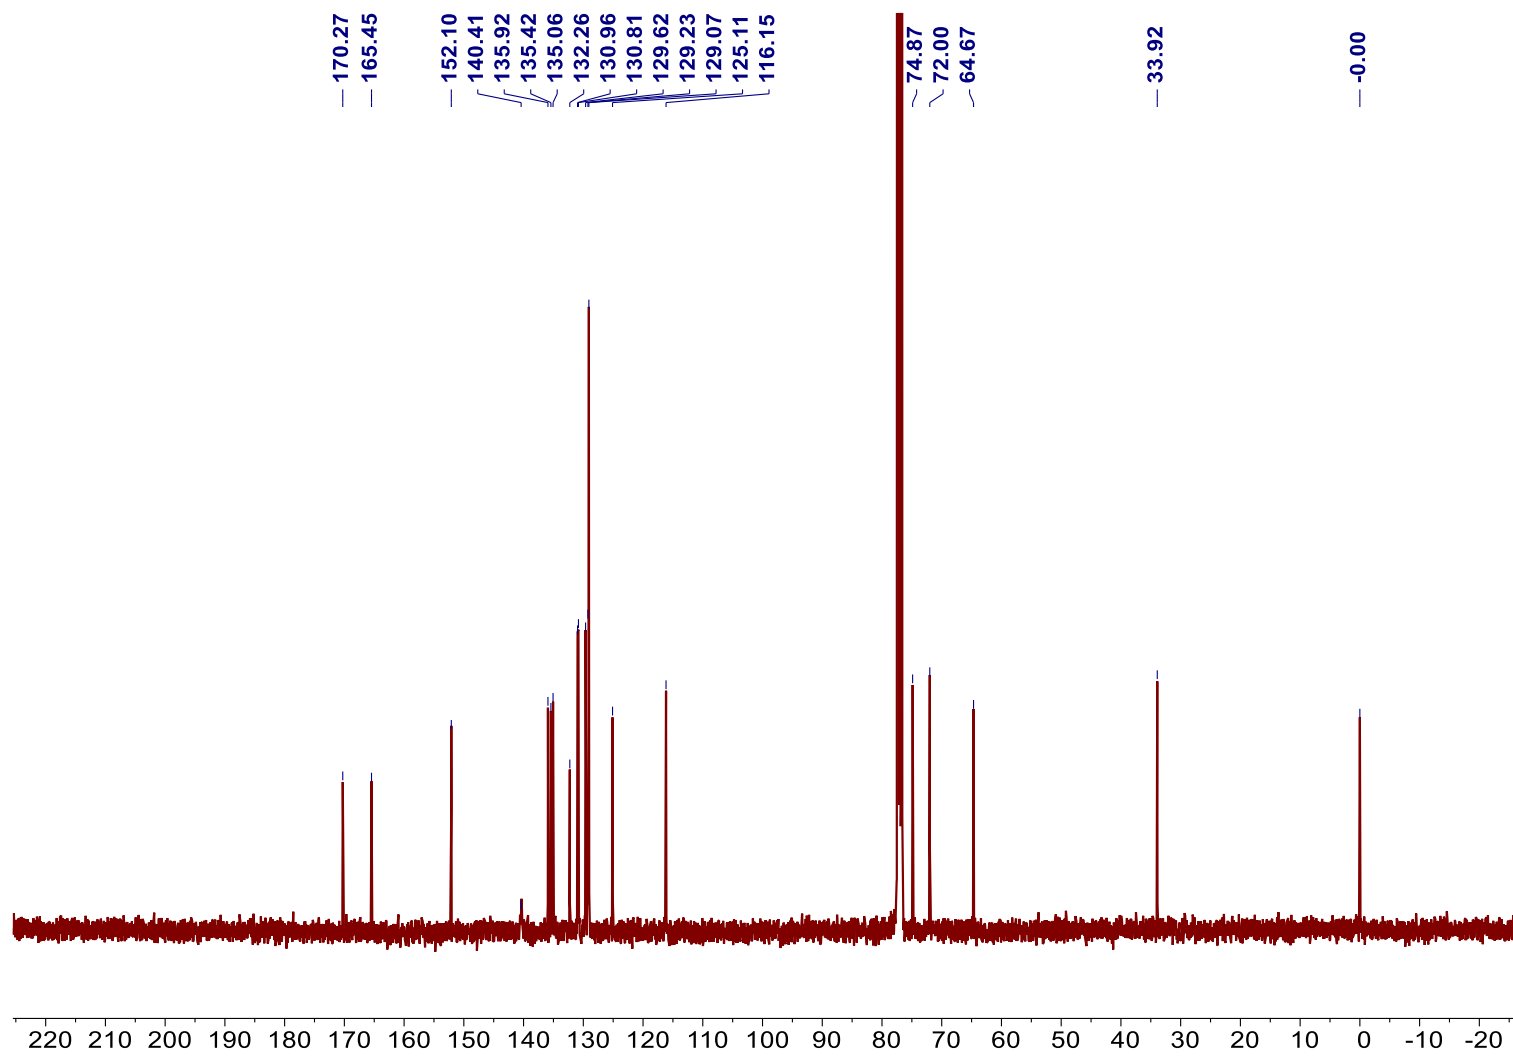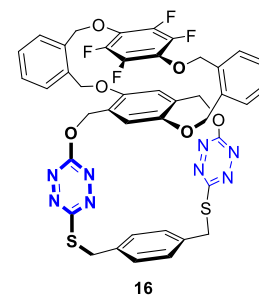

$^{13}\text{C}$ - $^{19}\text{F}$  decoupled  
NMR  
 $\text{CDCl}_3$



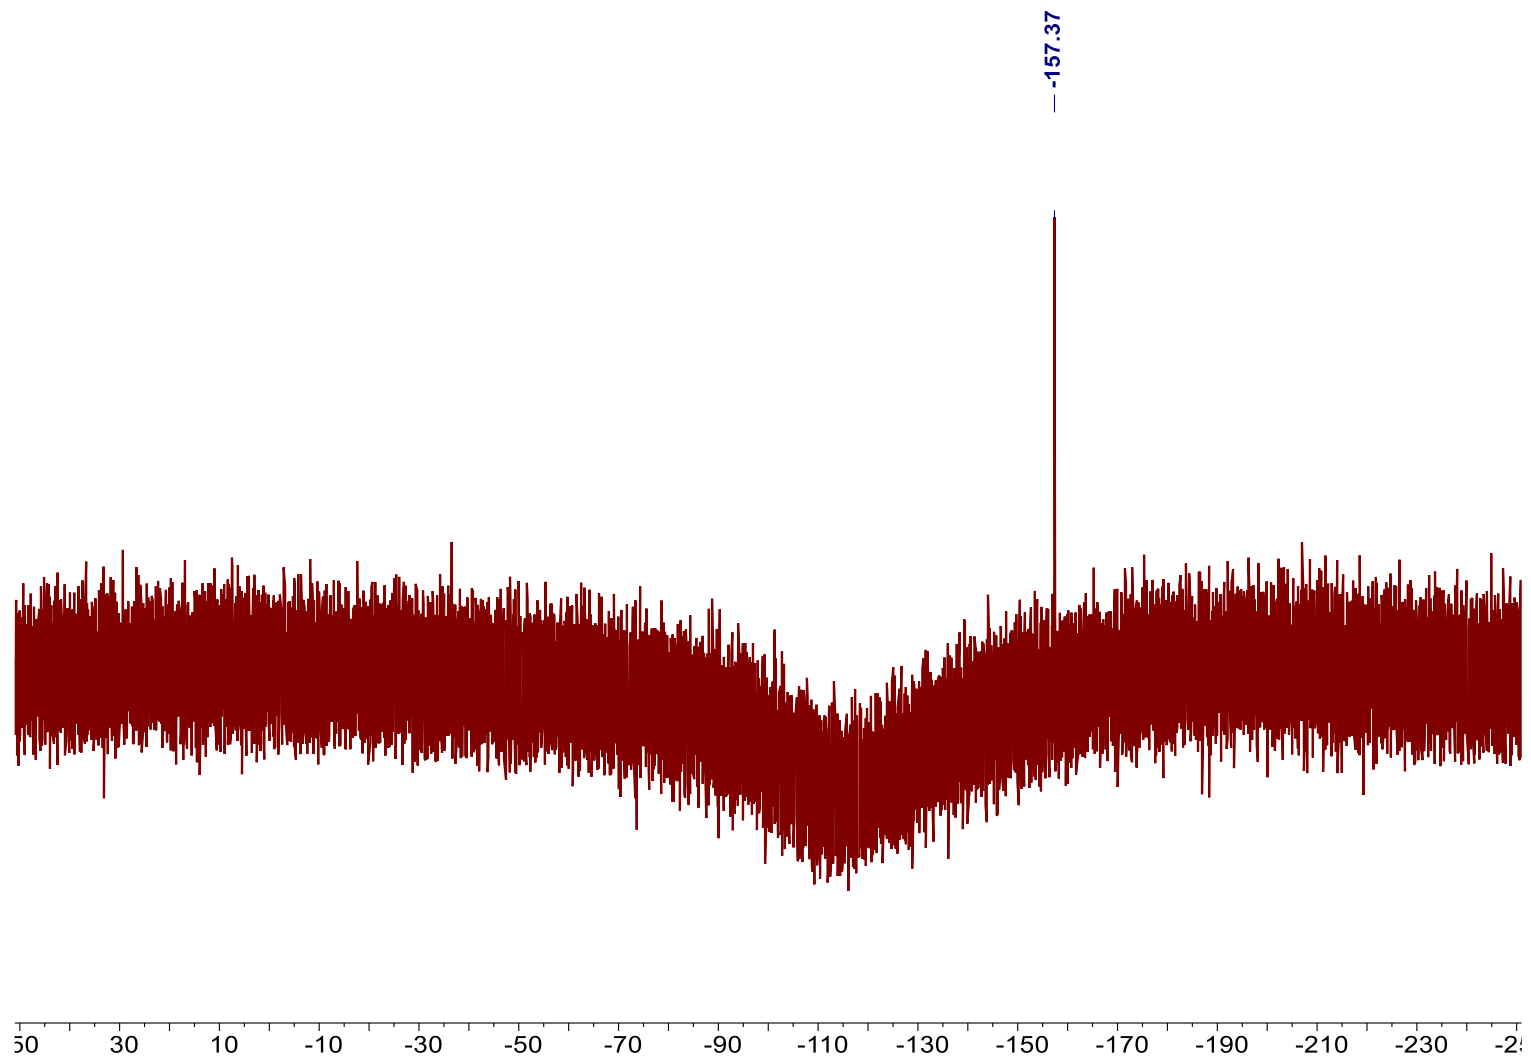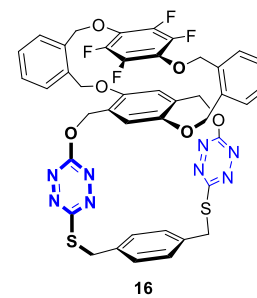

$^{19}\text{F}$  NMR  
DMSO- $d_6$  (120 °C)

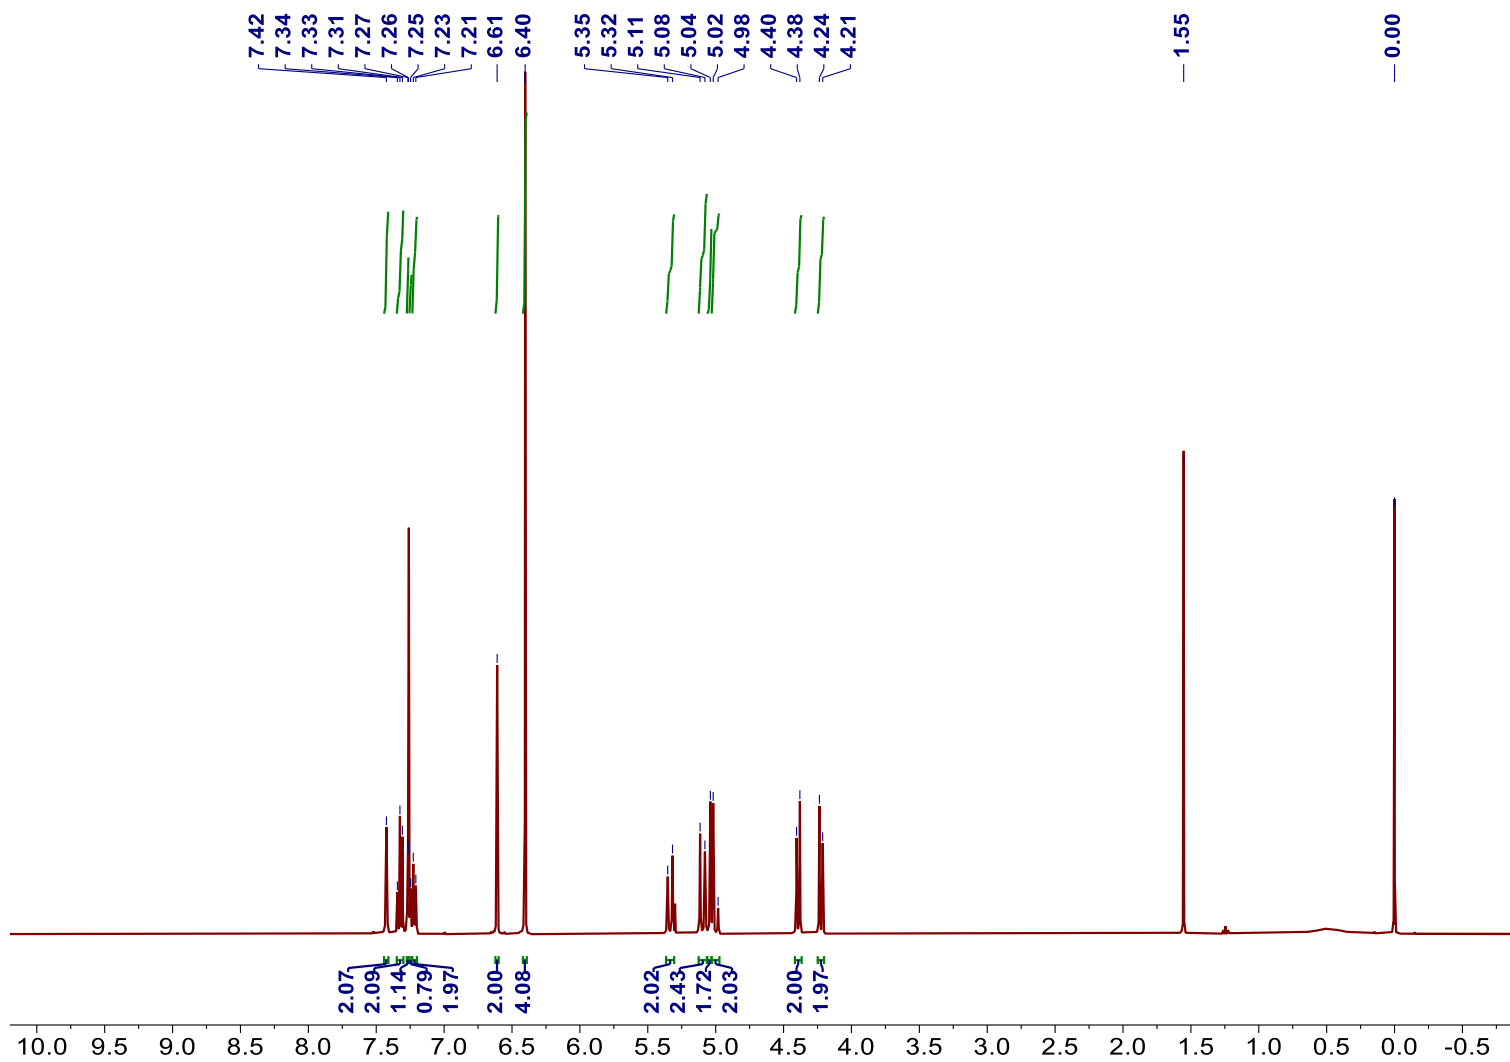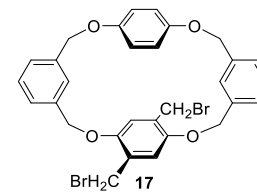

<sup>1</sup>H NMR  
CDCl<sub>3</sub>

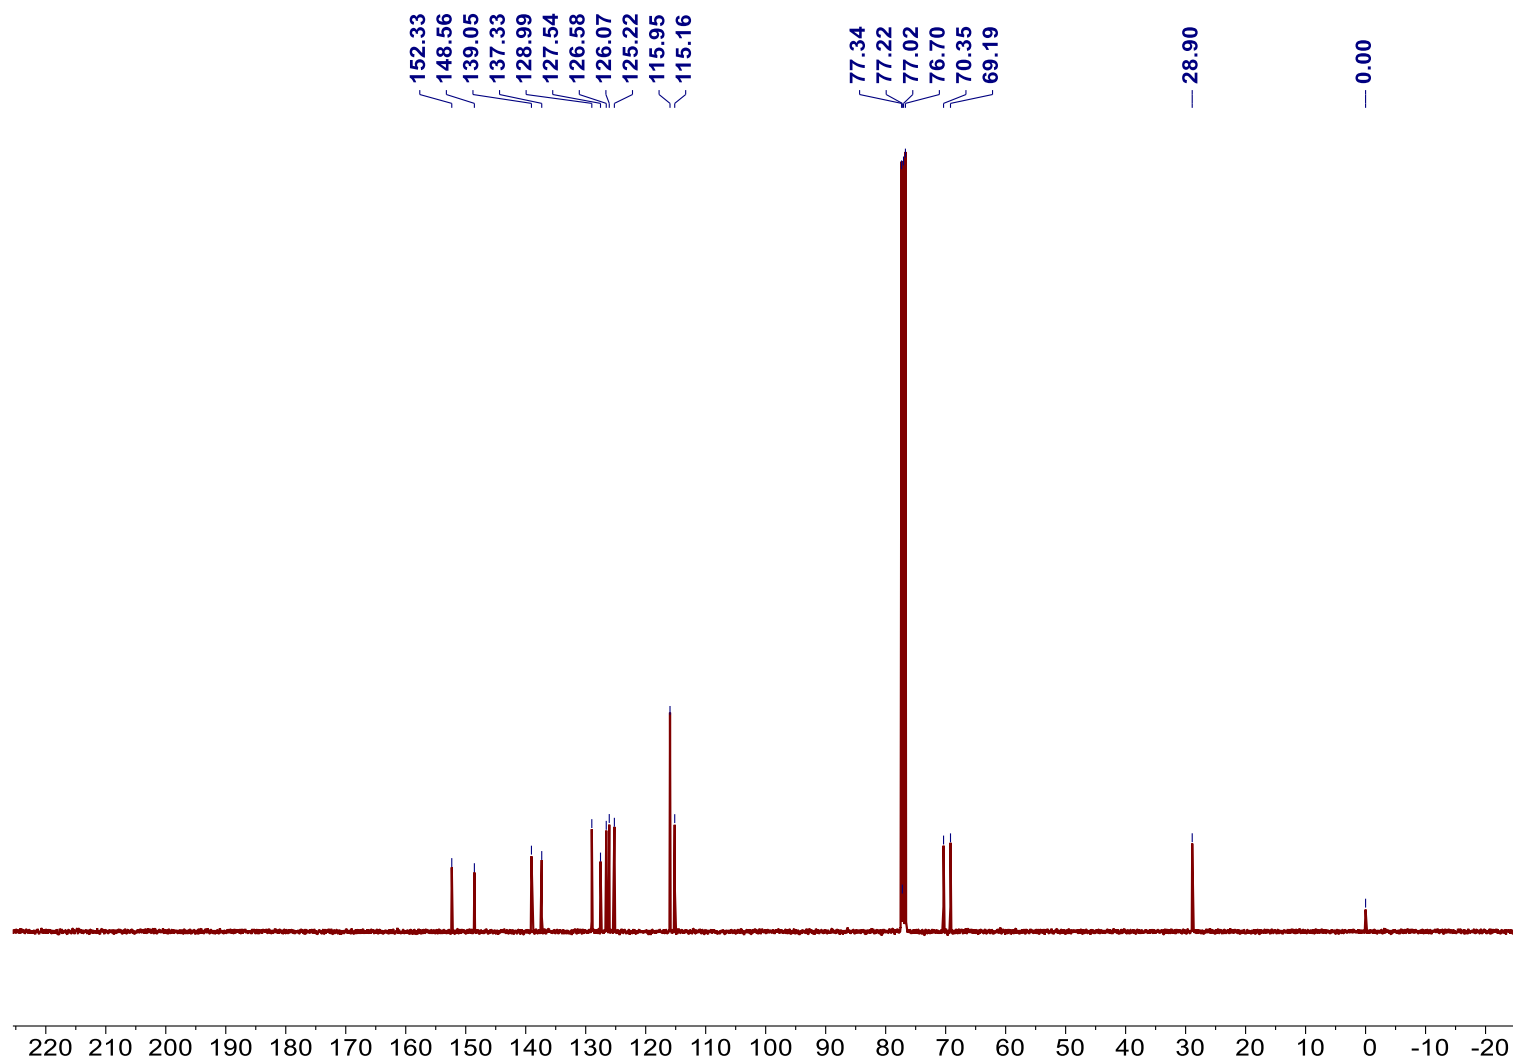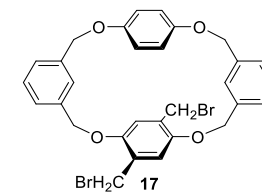

<sup>13</sup>C NMR  
CDCl<sub>3</sub>

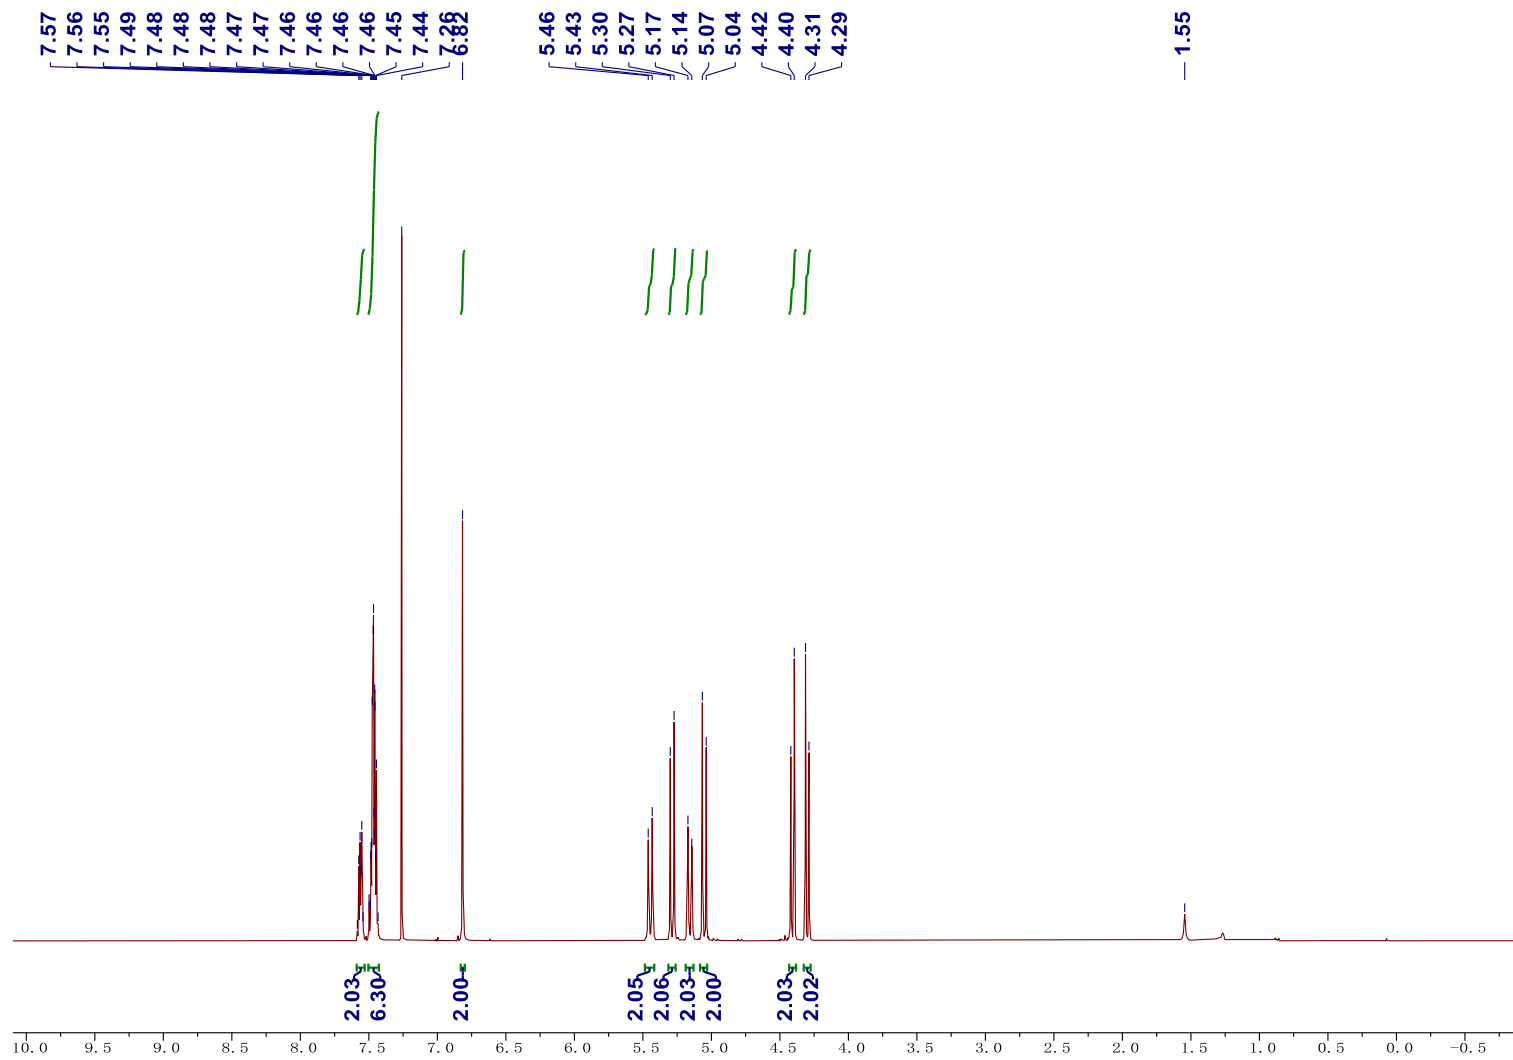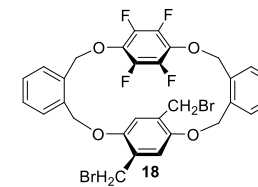

$^1\text{H NMR}$   
 $\text{CDCl}_3$

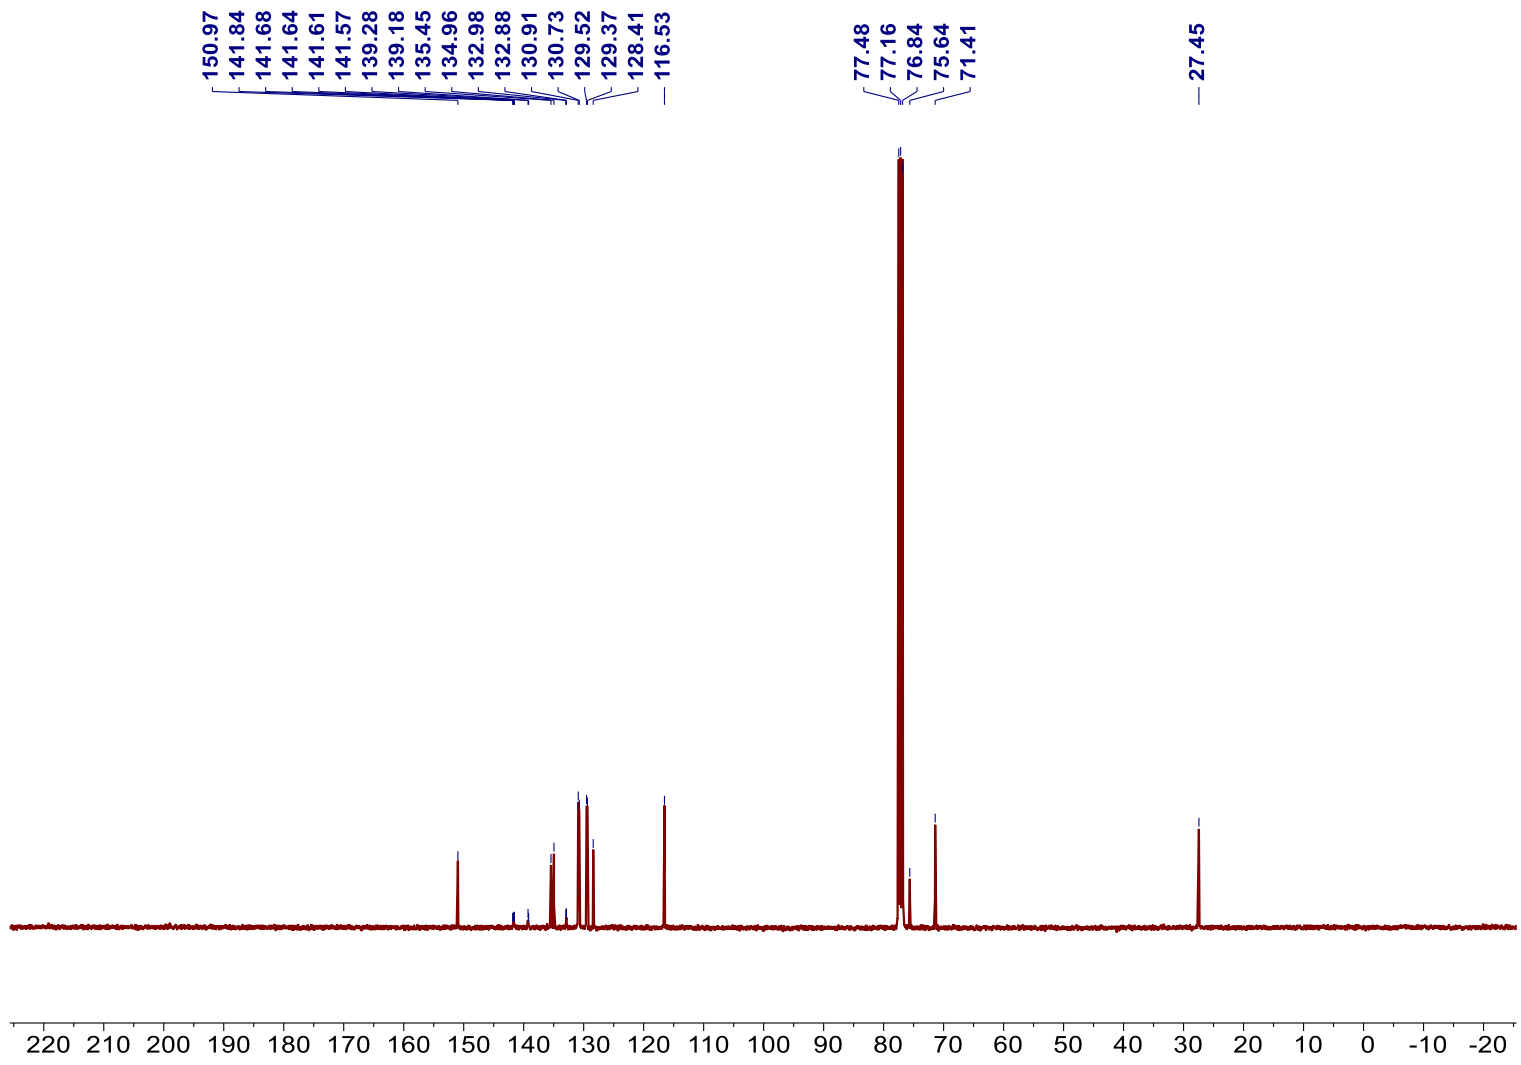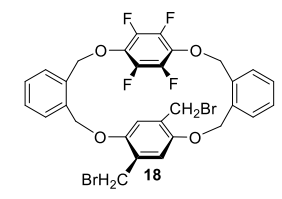

<sup>13</sup>C NMR  
CDCl<sub>3</sub>



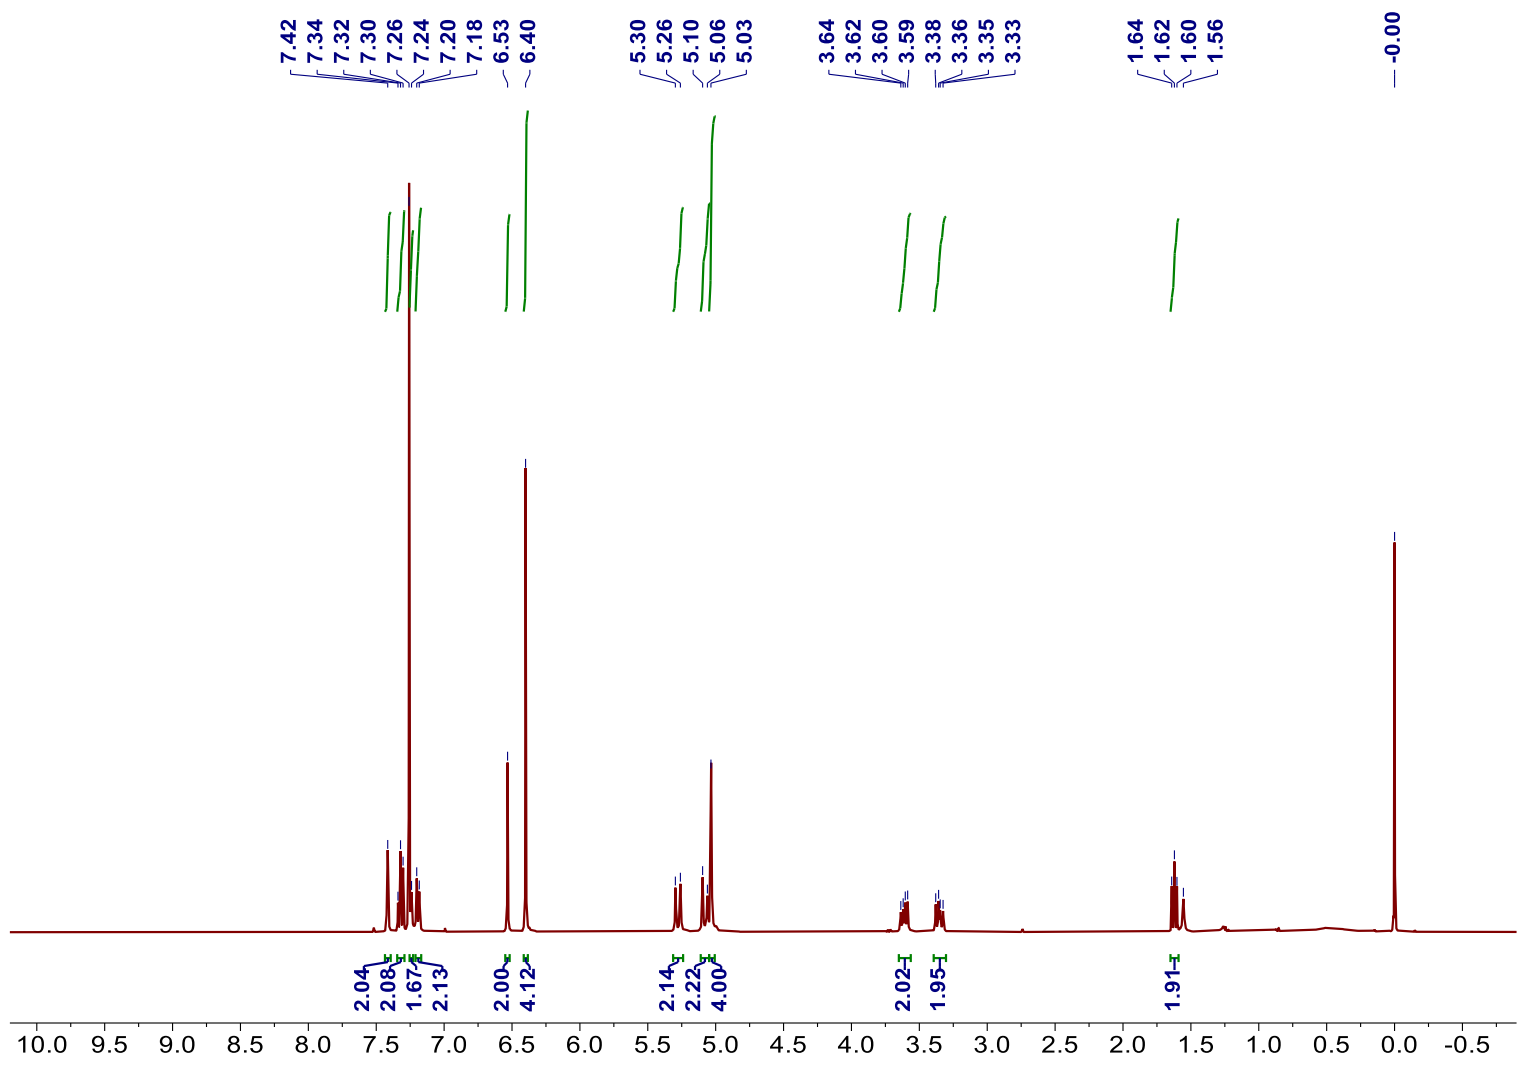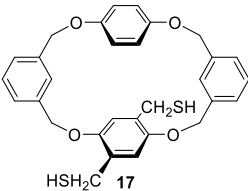

<sup>1</sup>H NMR  
CDCl<sub>3</sub>

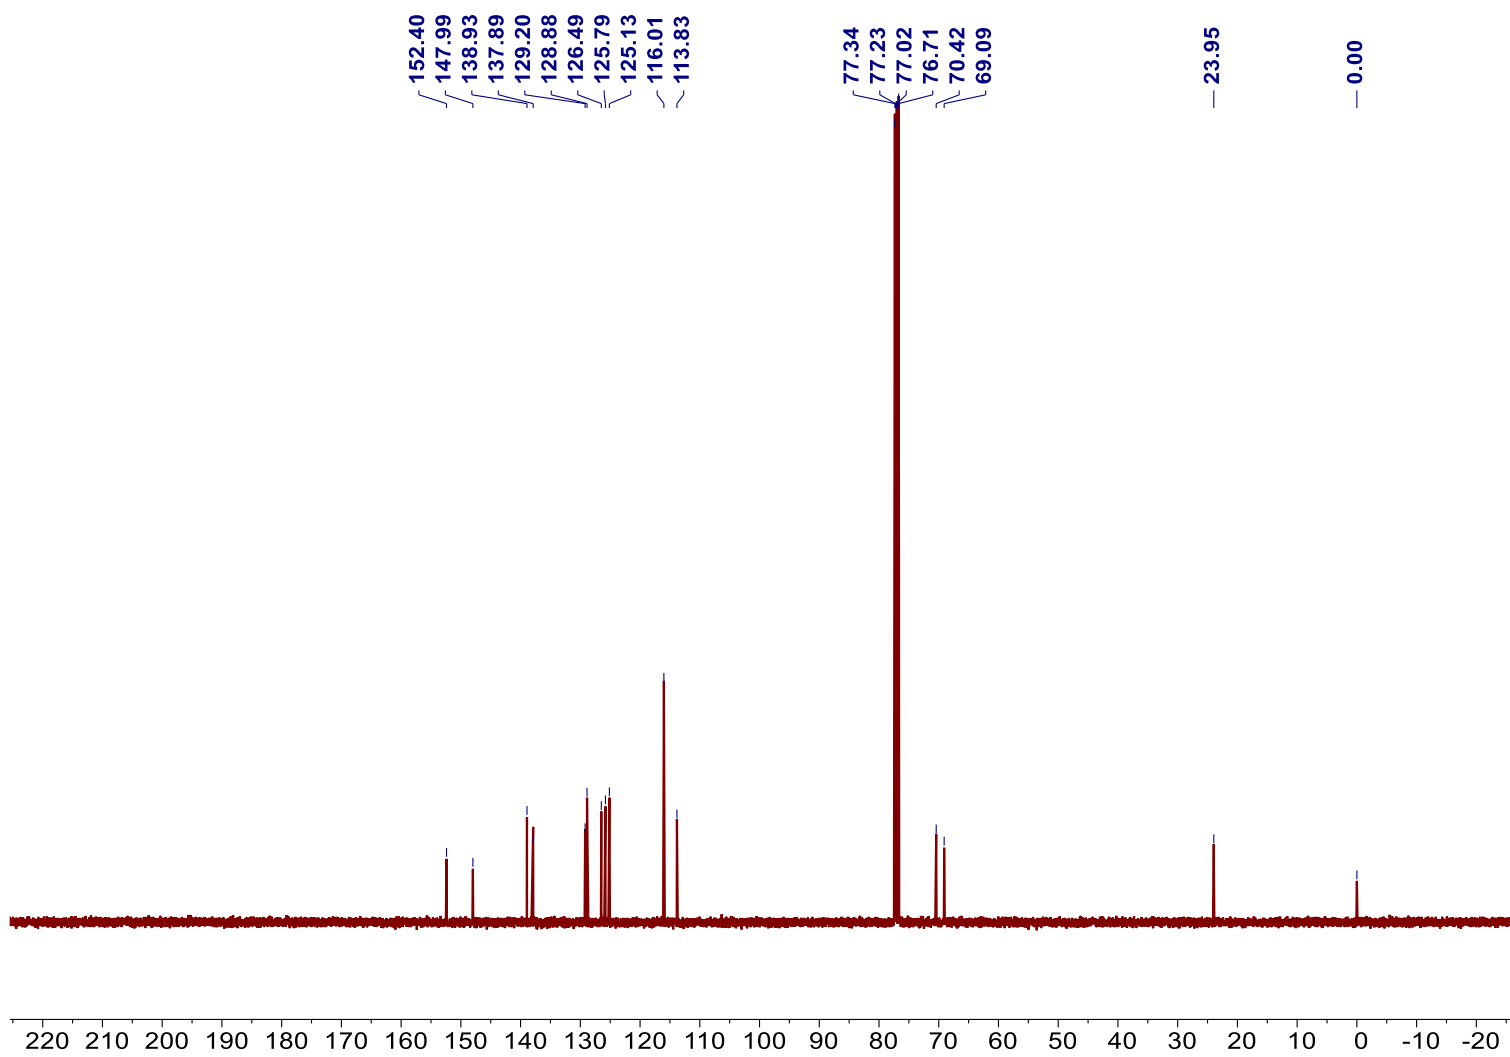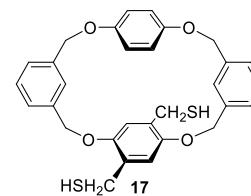

<sup>13</sup>C NMR  
CDCl<sub>3</sub>



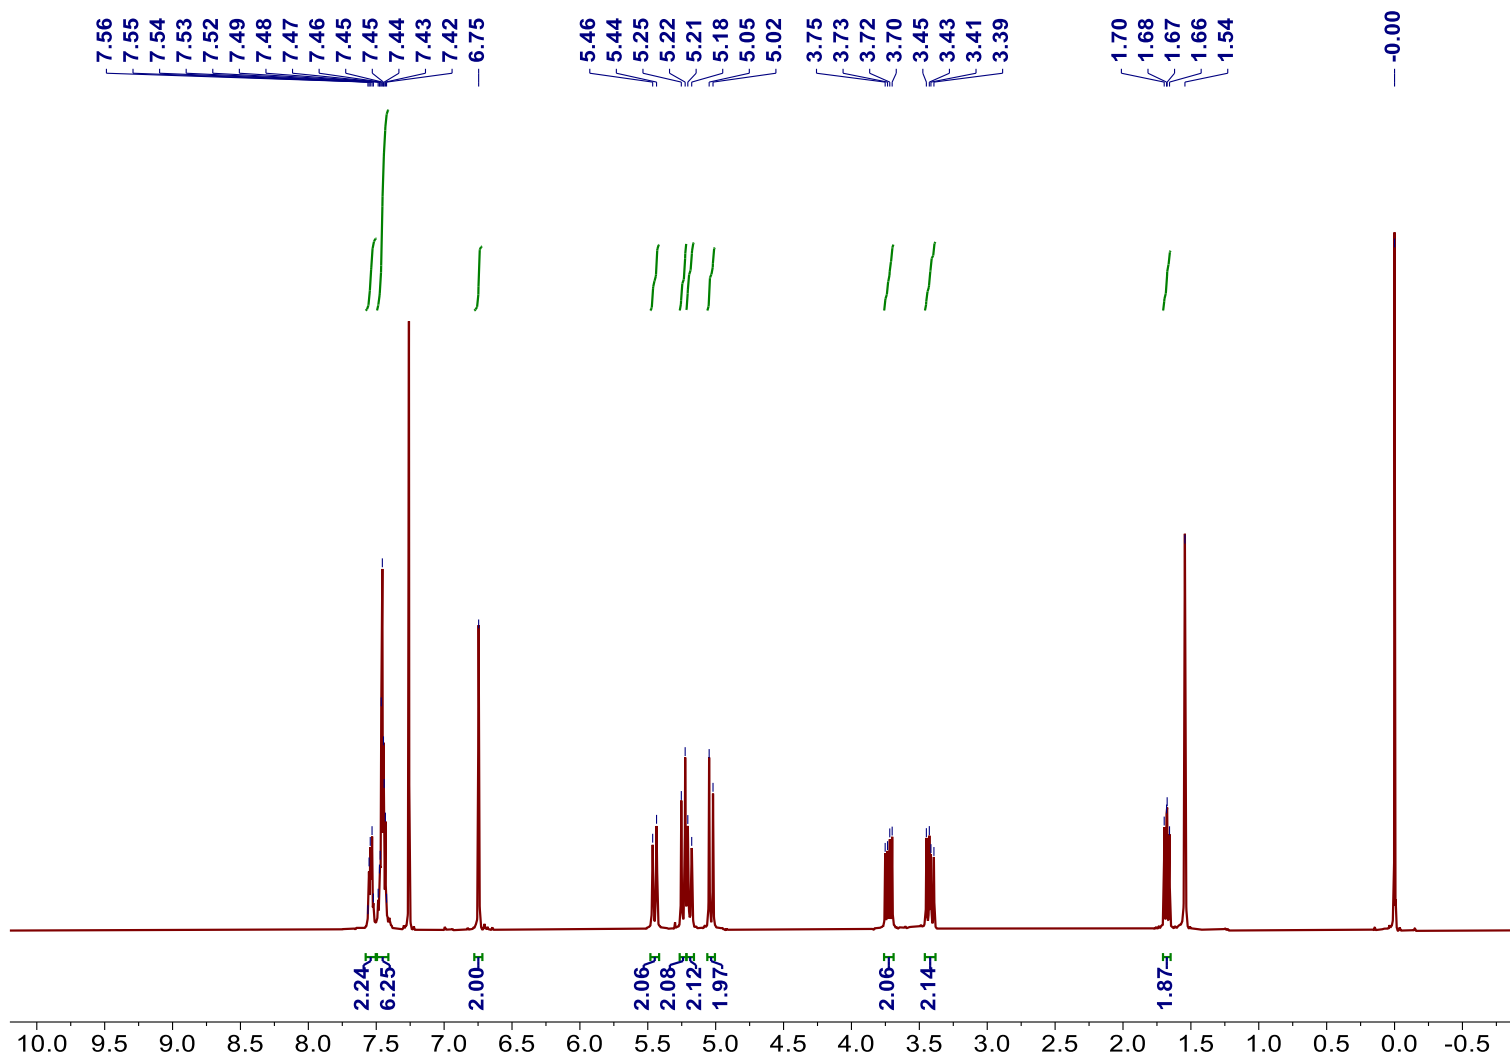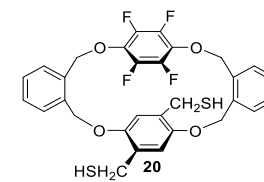

$^1\text{H NMR}$   
 $\text{CDCl}_3$



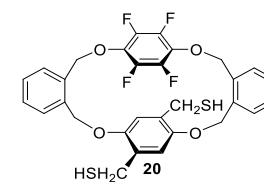

<sup>19</sup>F NMR

DMSO-*d*<sub>6</sub> (120 °C)

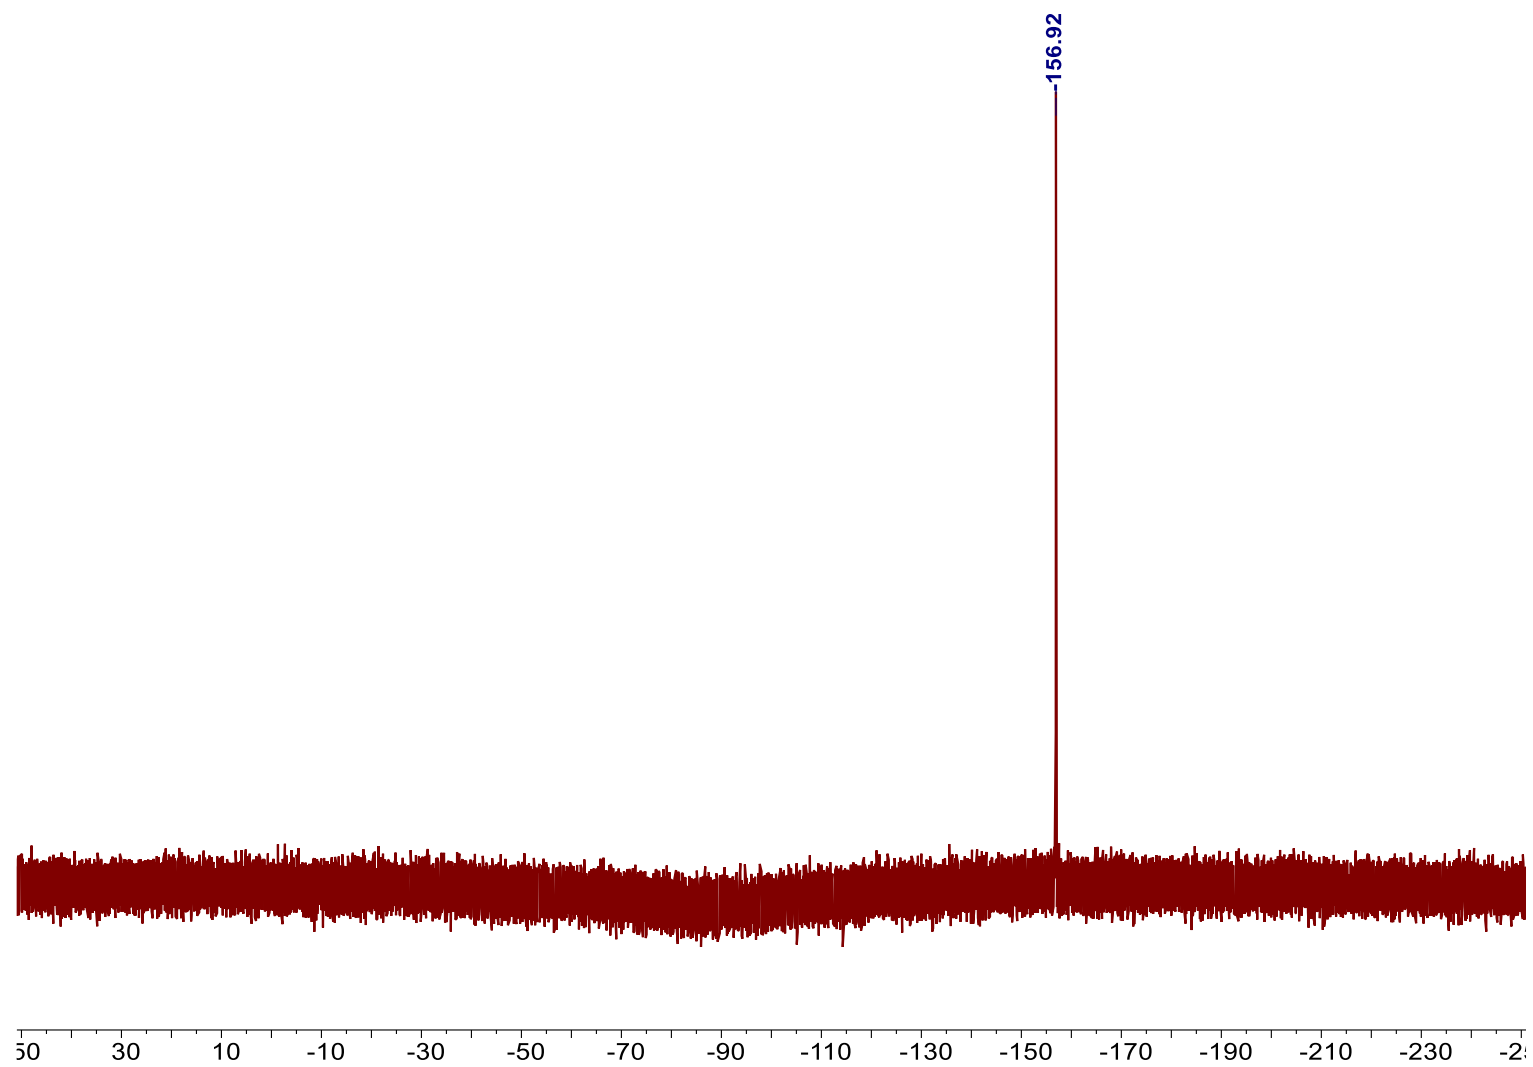

S139

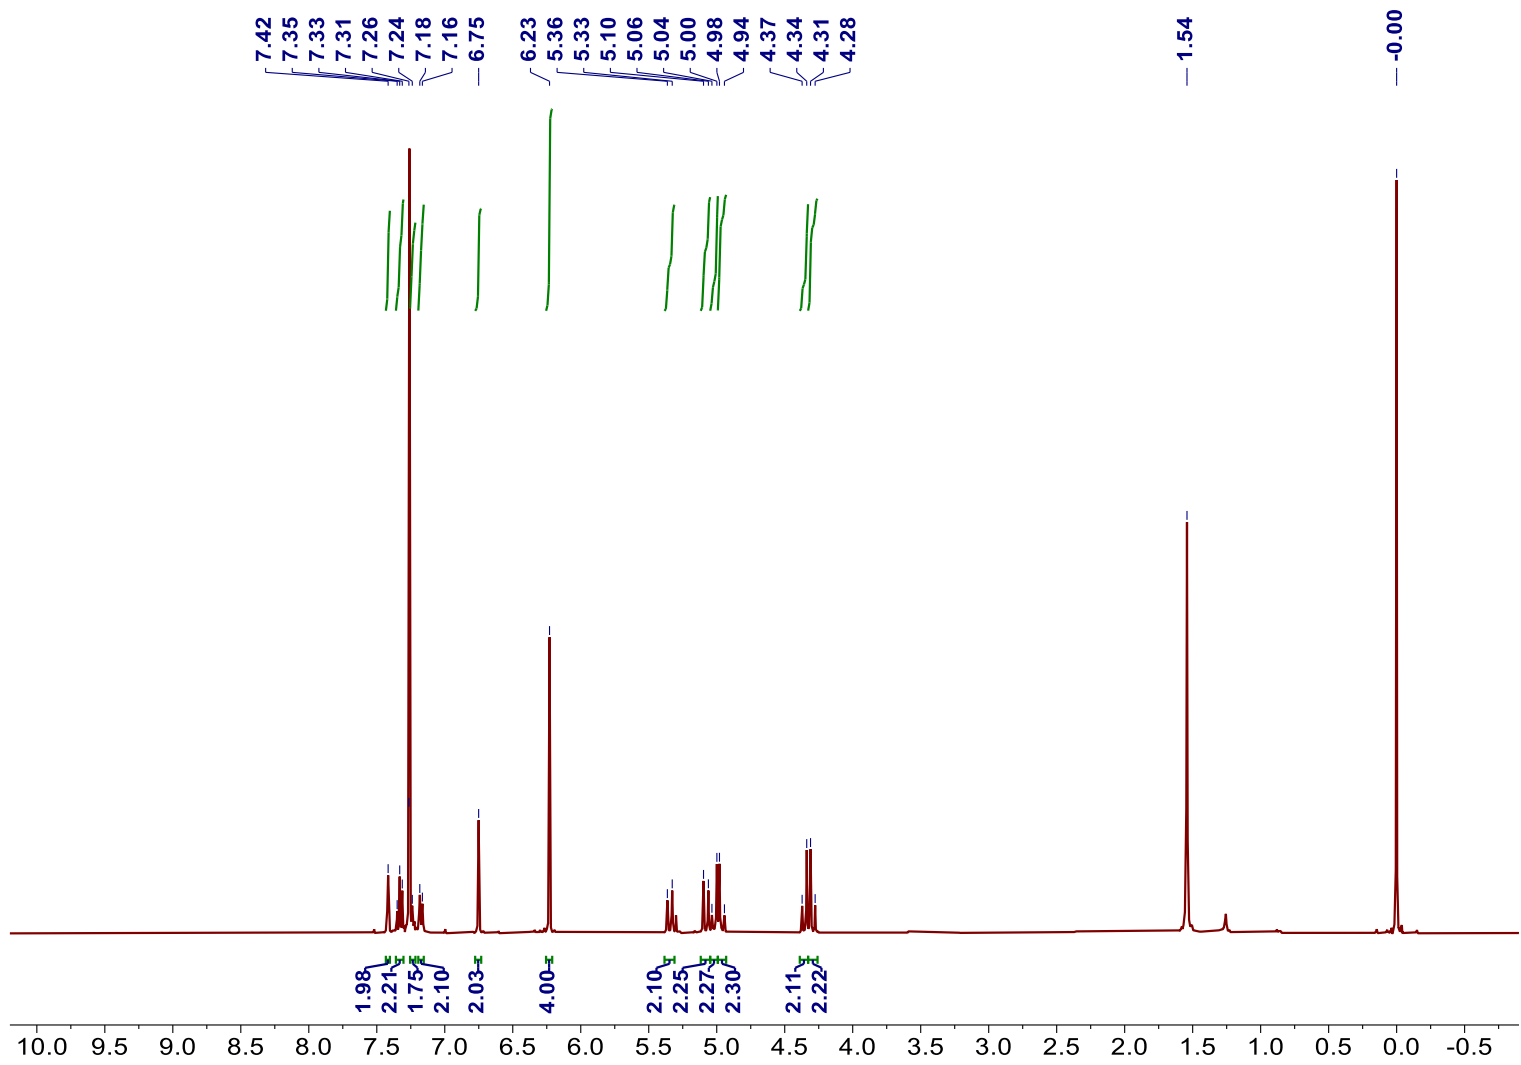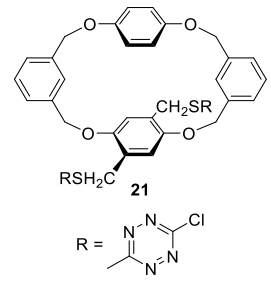

<sup>1</sup>H NMR  
CDCl<sub>3</sub>

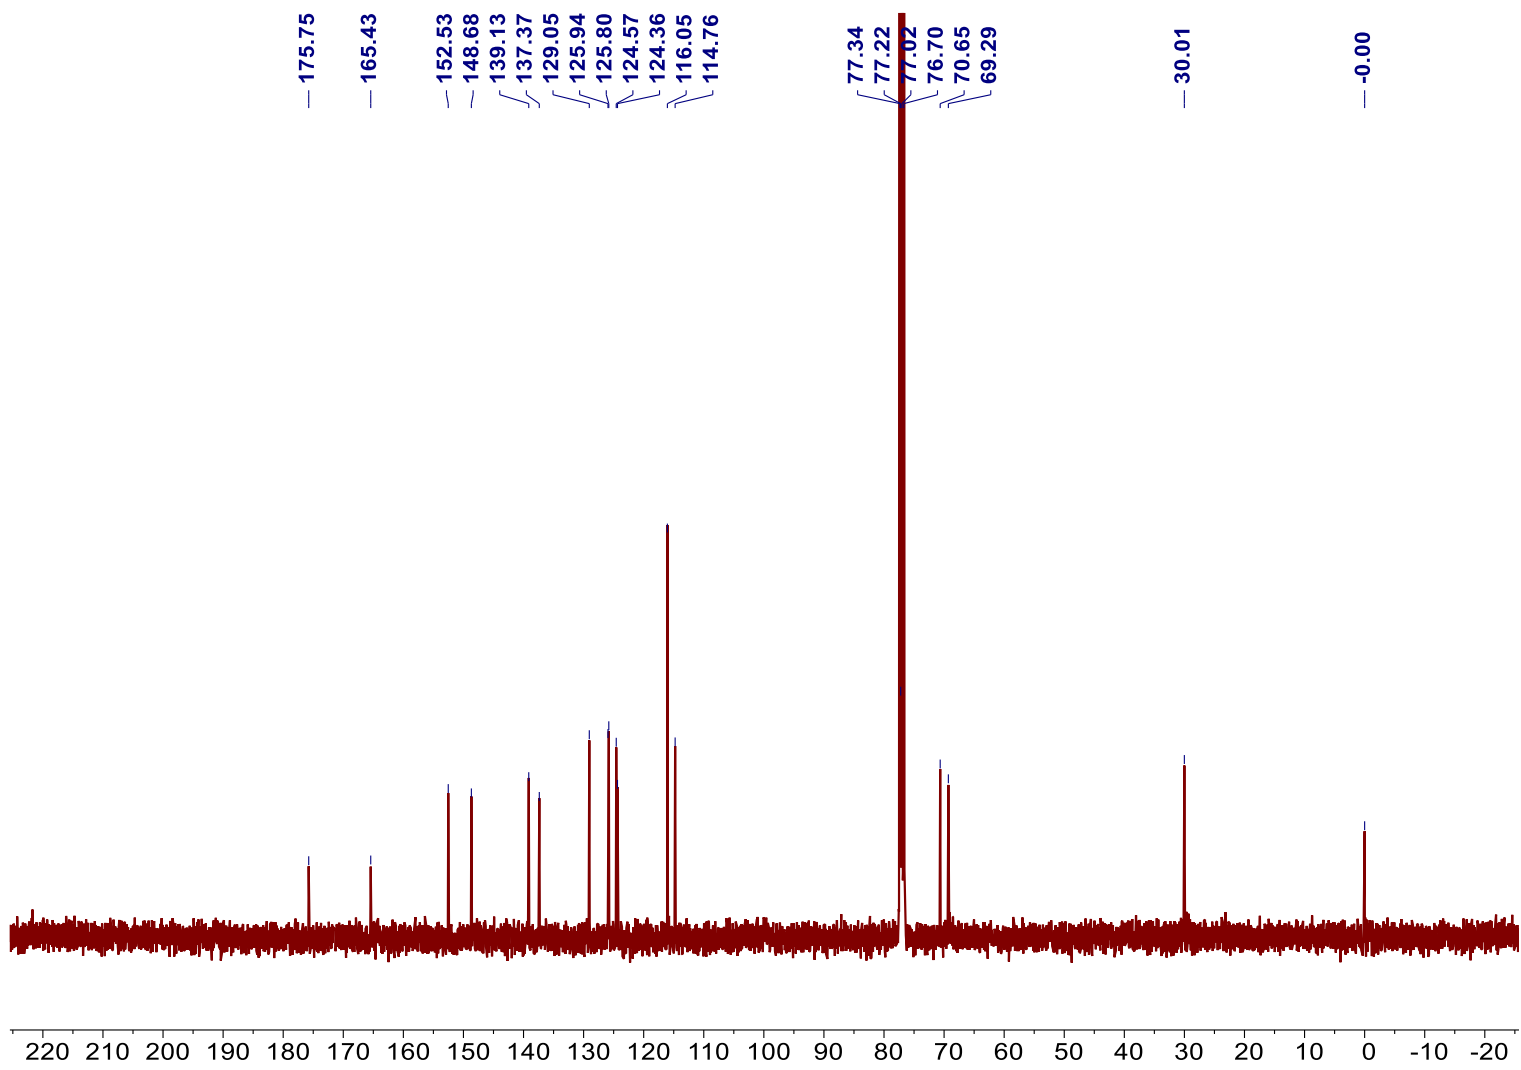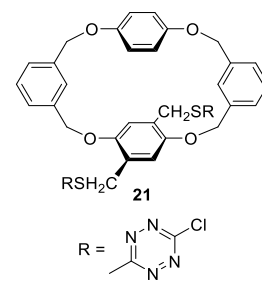

$^{13}\text{C}$  NMR  
 $\text{CDCl}_3$

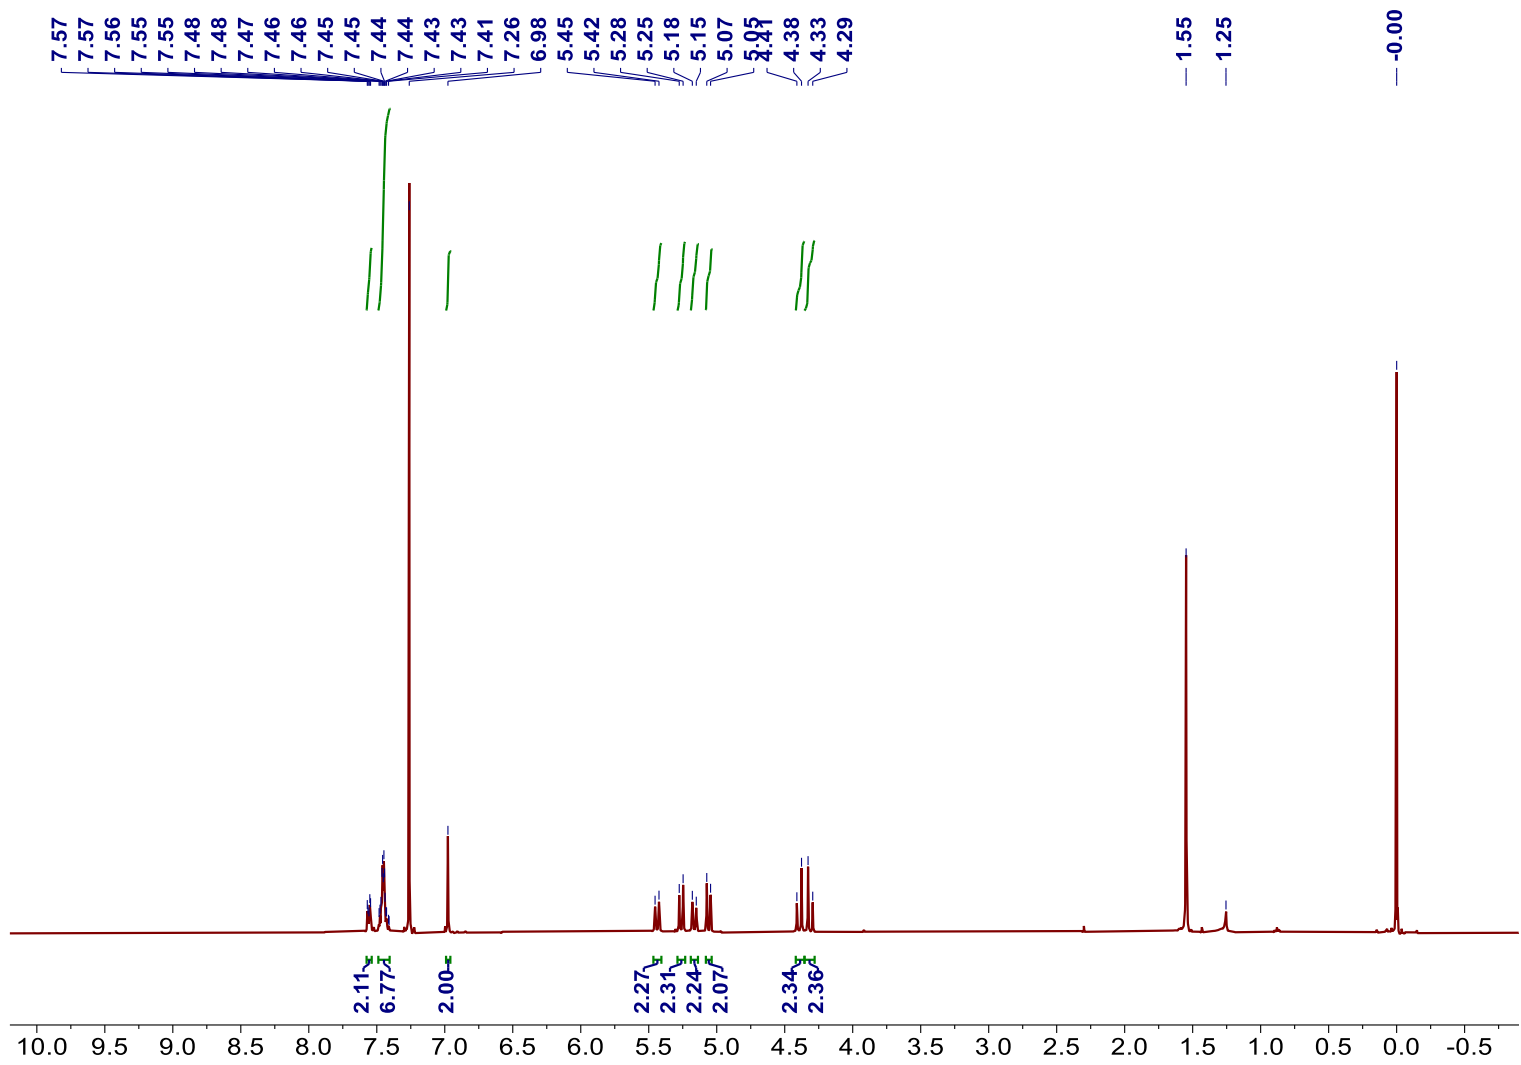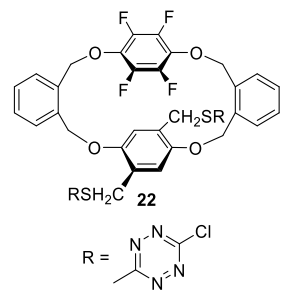

<sup>1</sup>H NMR  
CDCl<sub>3</sub>

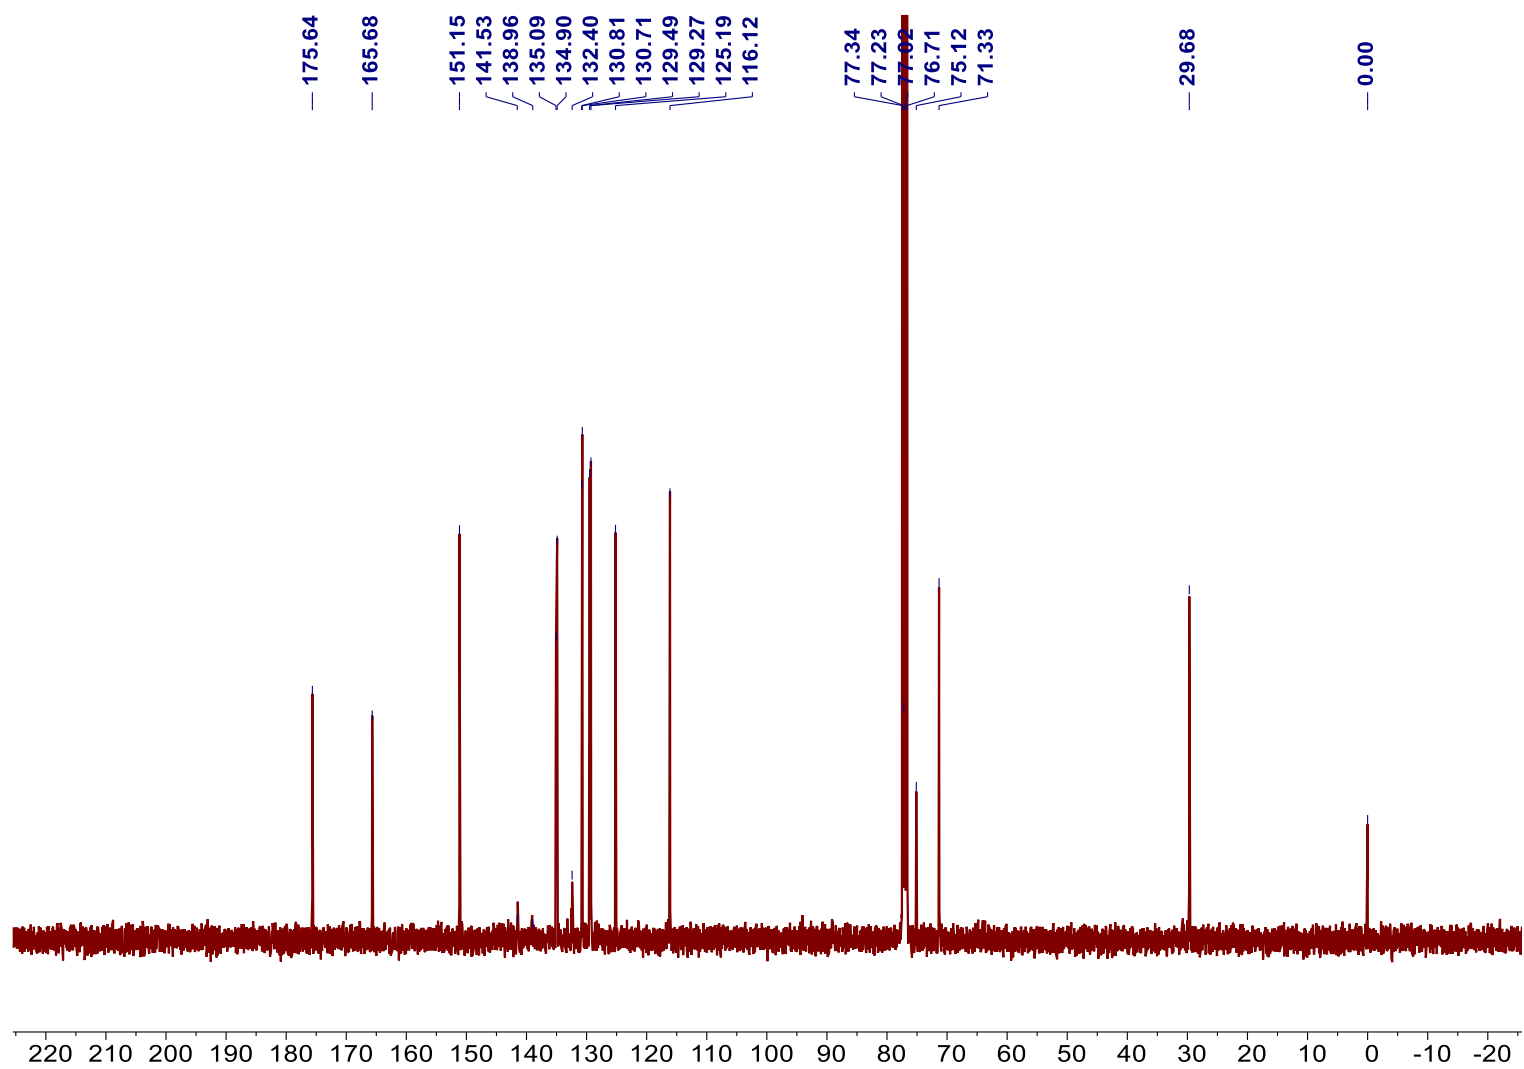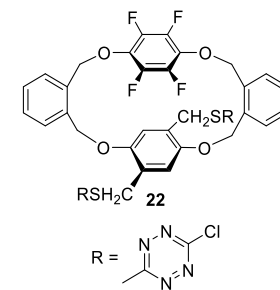

$^{13}\text{C}$  NMR

$\text{CDCl}_3$

S143

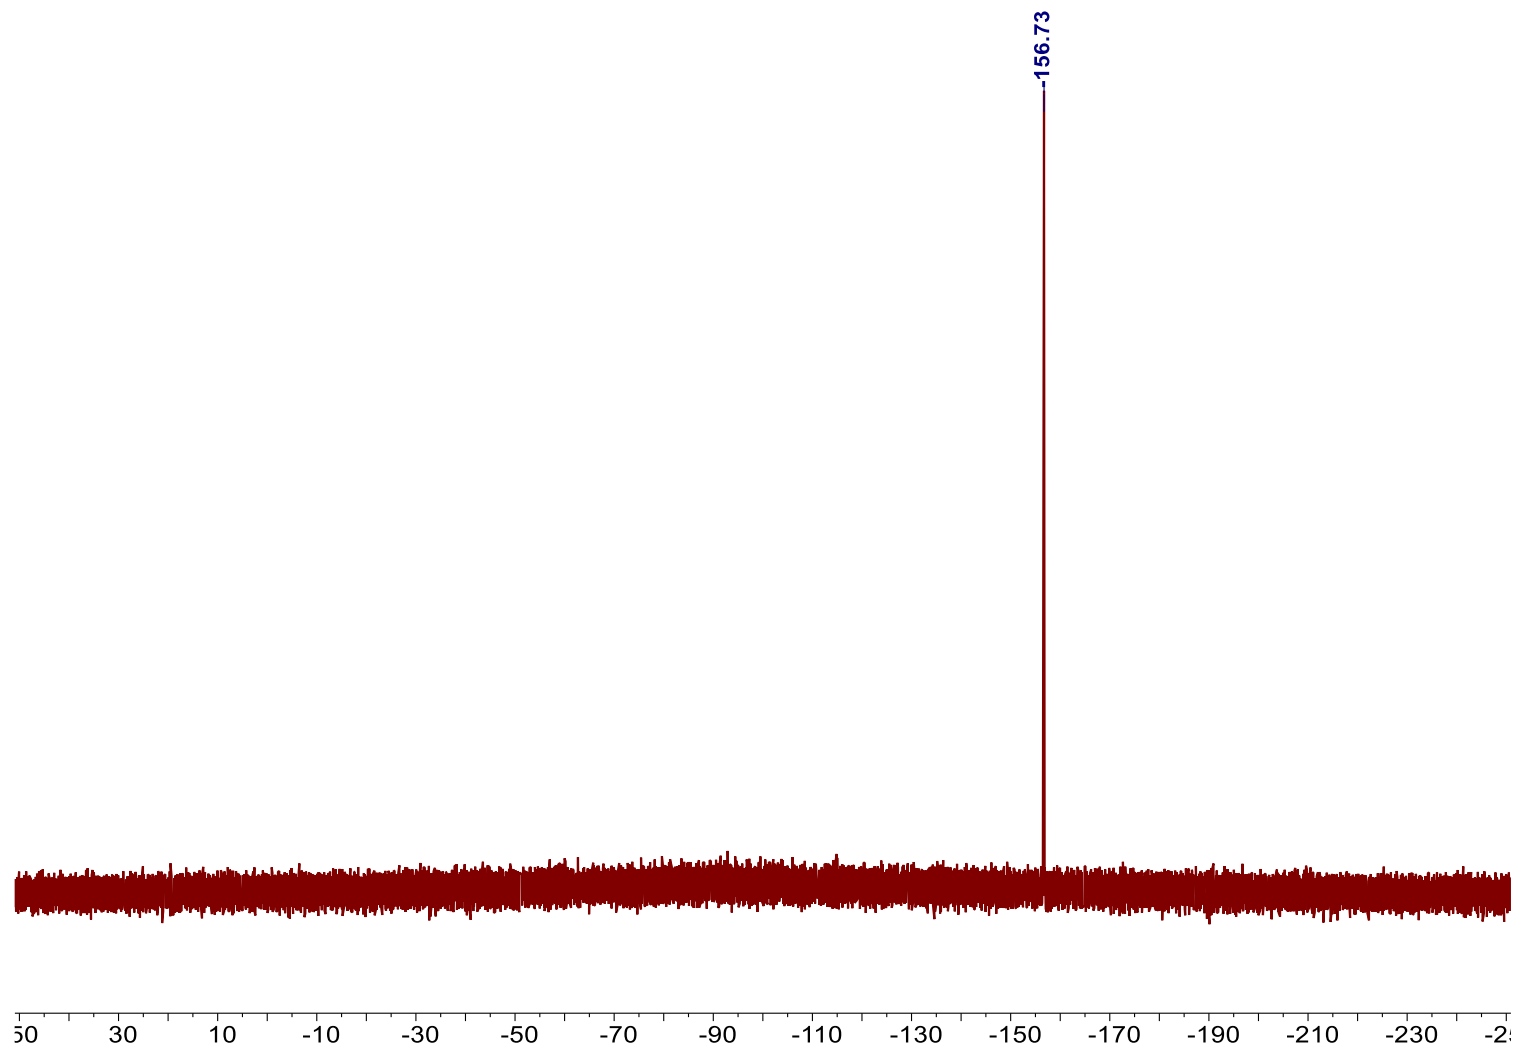

**19F NMR**

**DMSO-d6 (120 °C)**

**S144**



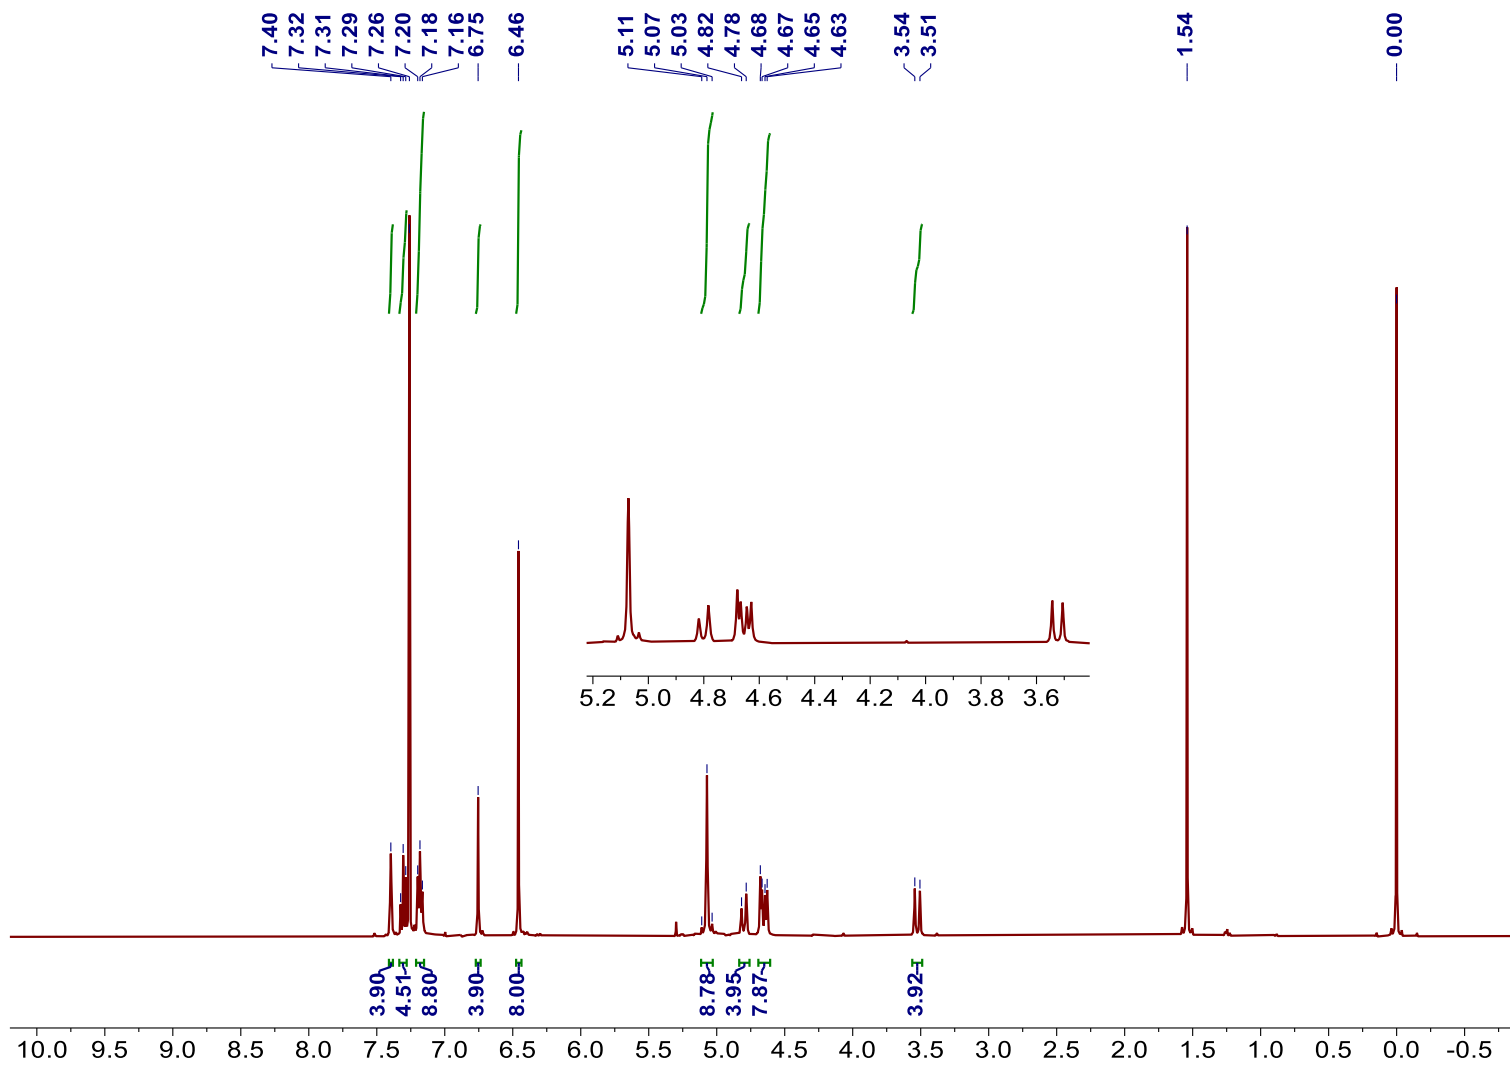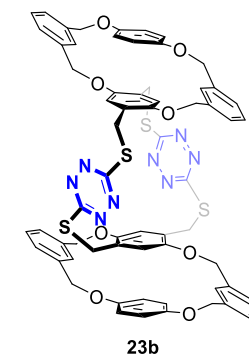

<sup>1</sup>H NMR  
CDCl<sub>3</sub>

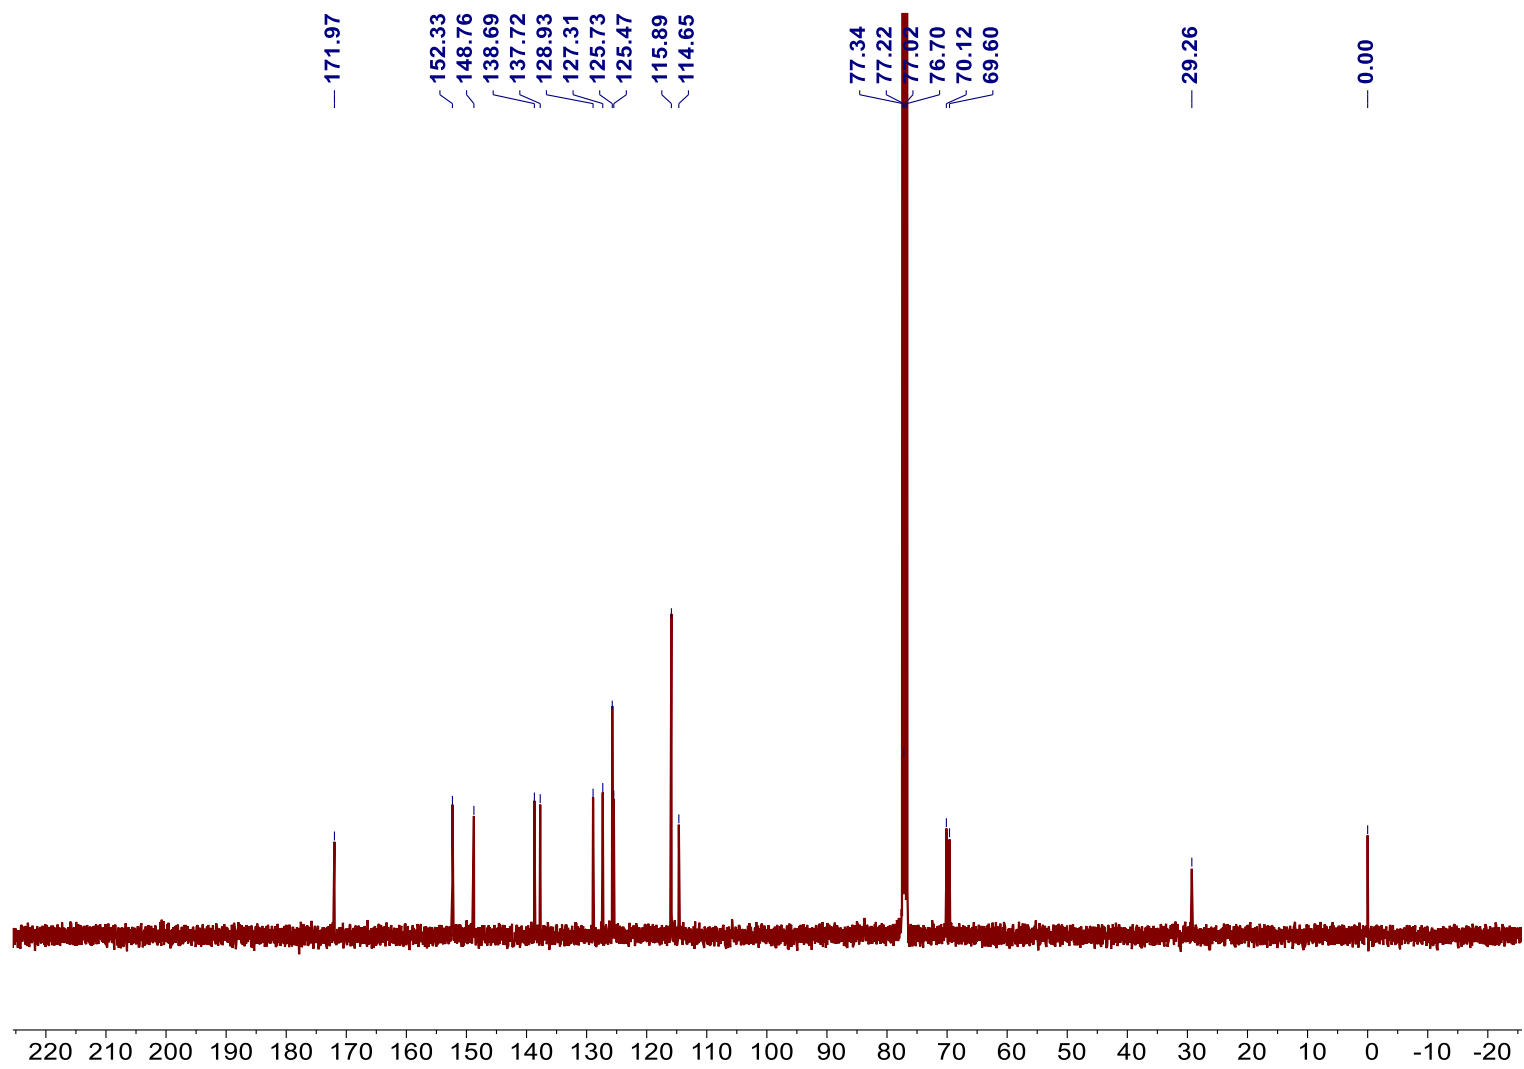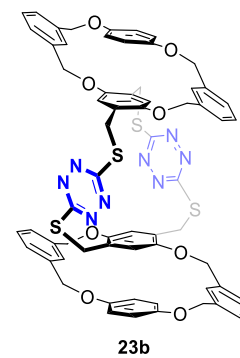

<sup>13</sup>C NMR

CDCl<sub>3</sub>

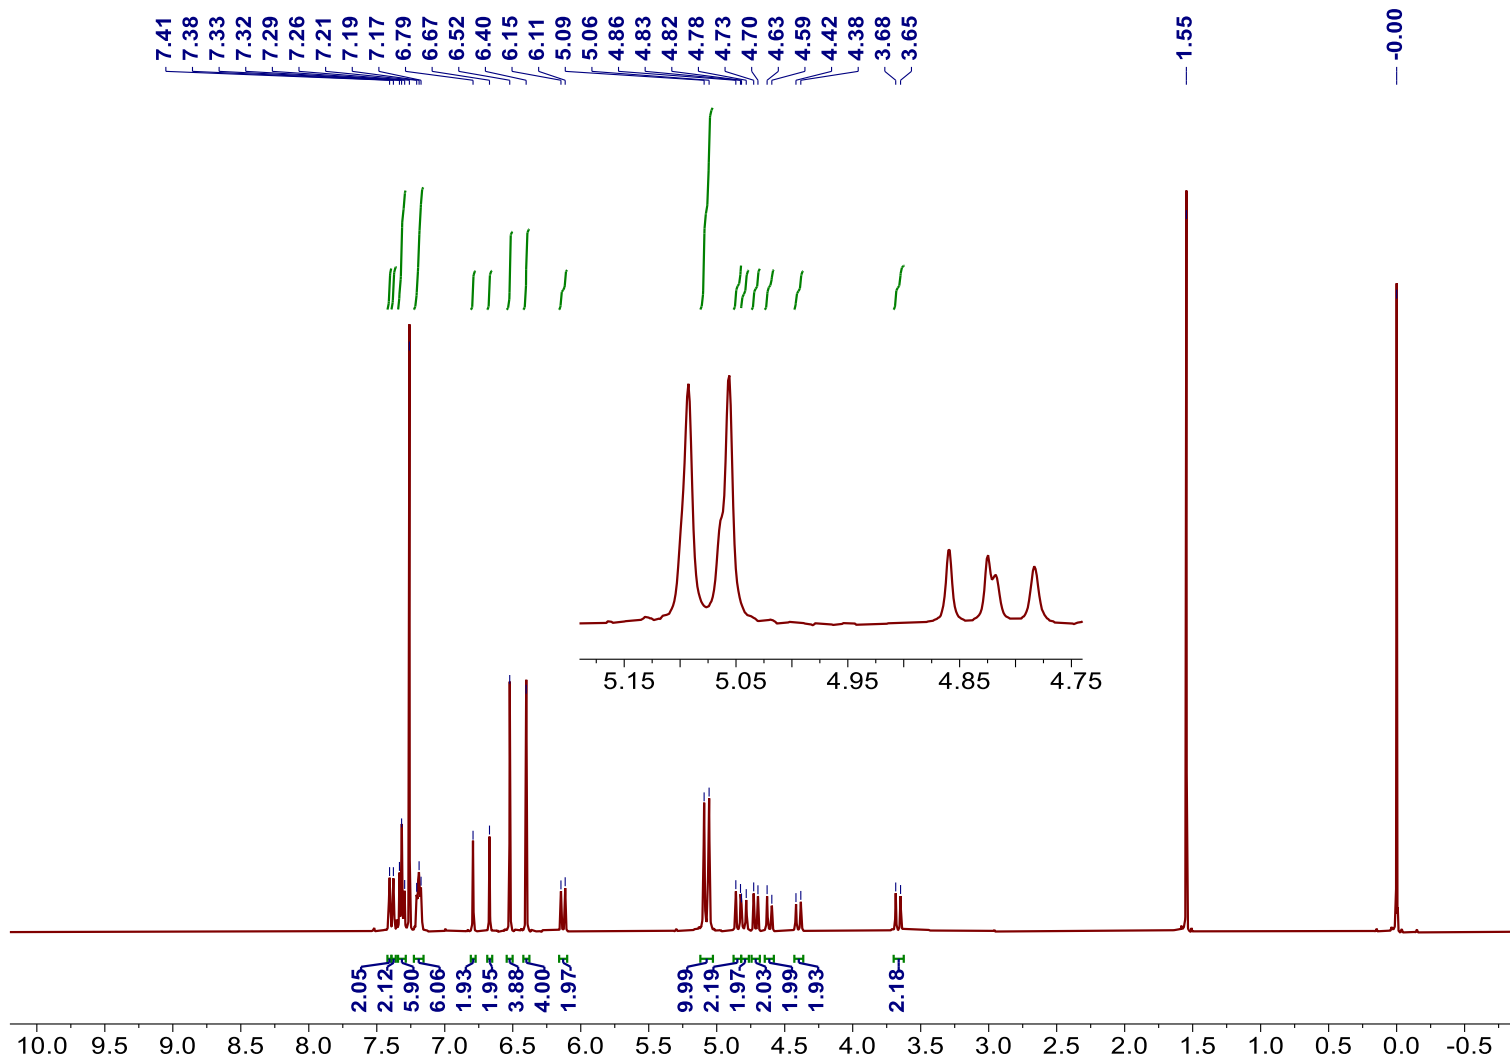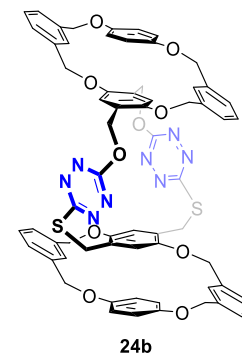

$^1\text{H}$  NMR  
 $\text{CDCl}_3$

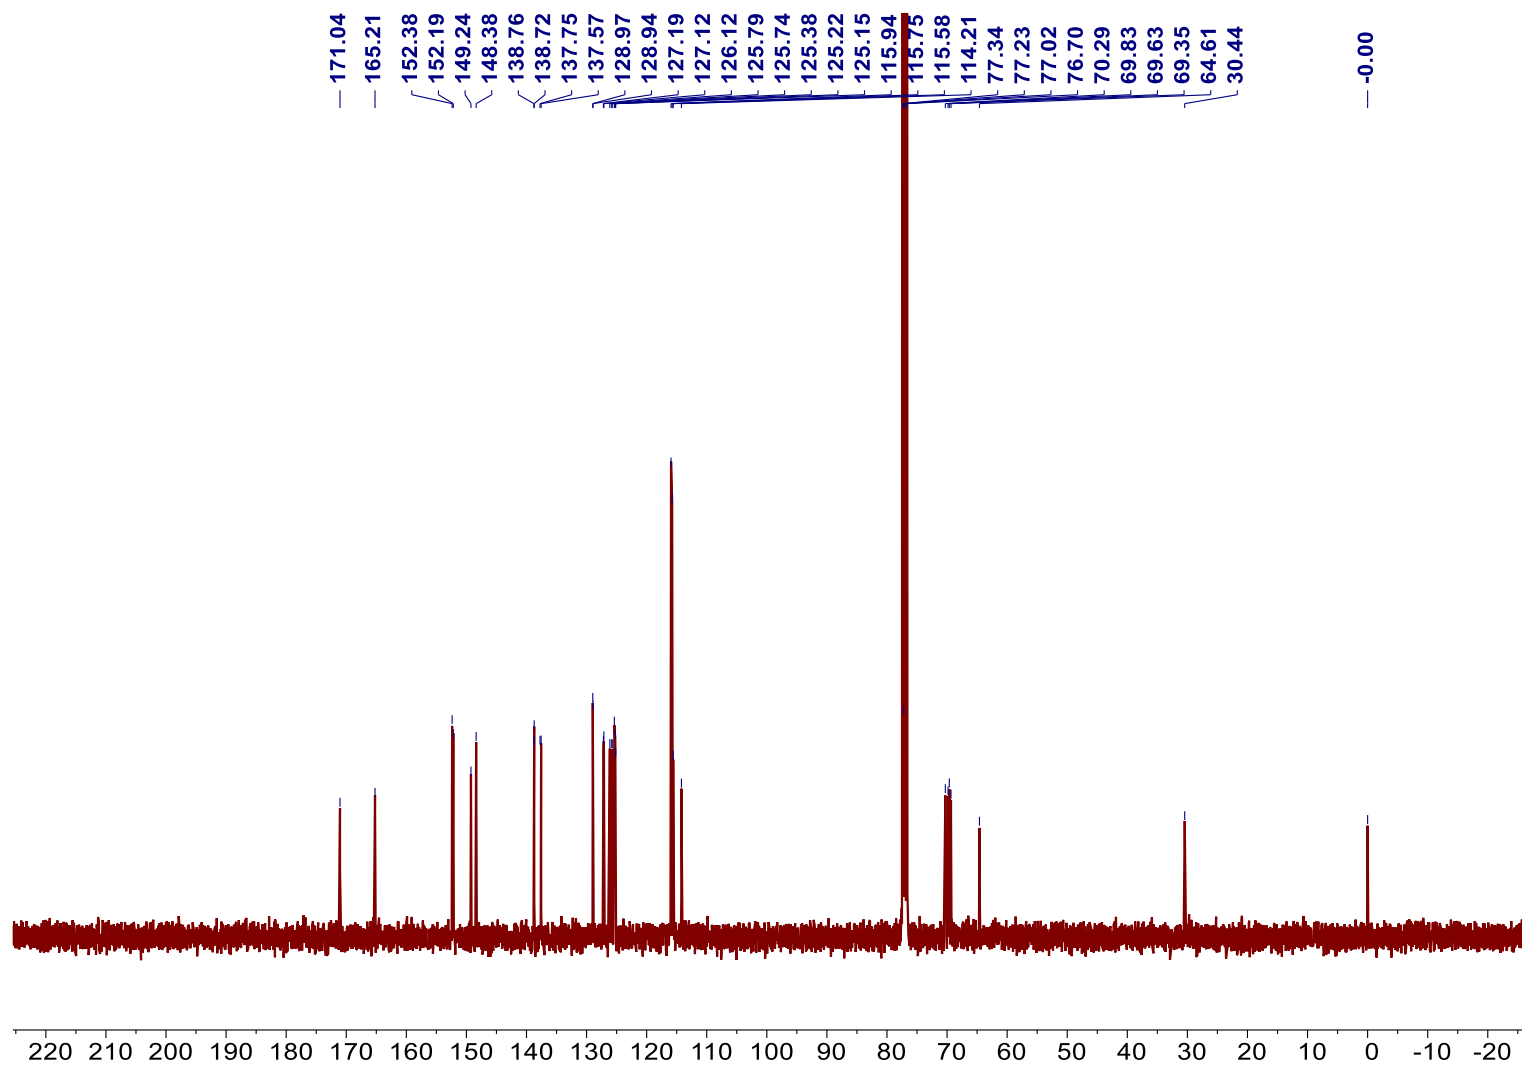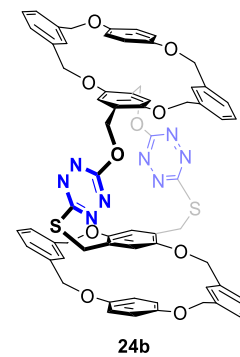

$^{13}\text{C}$  NMR

$\text{CDCl}_3$

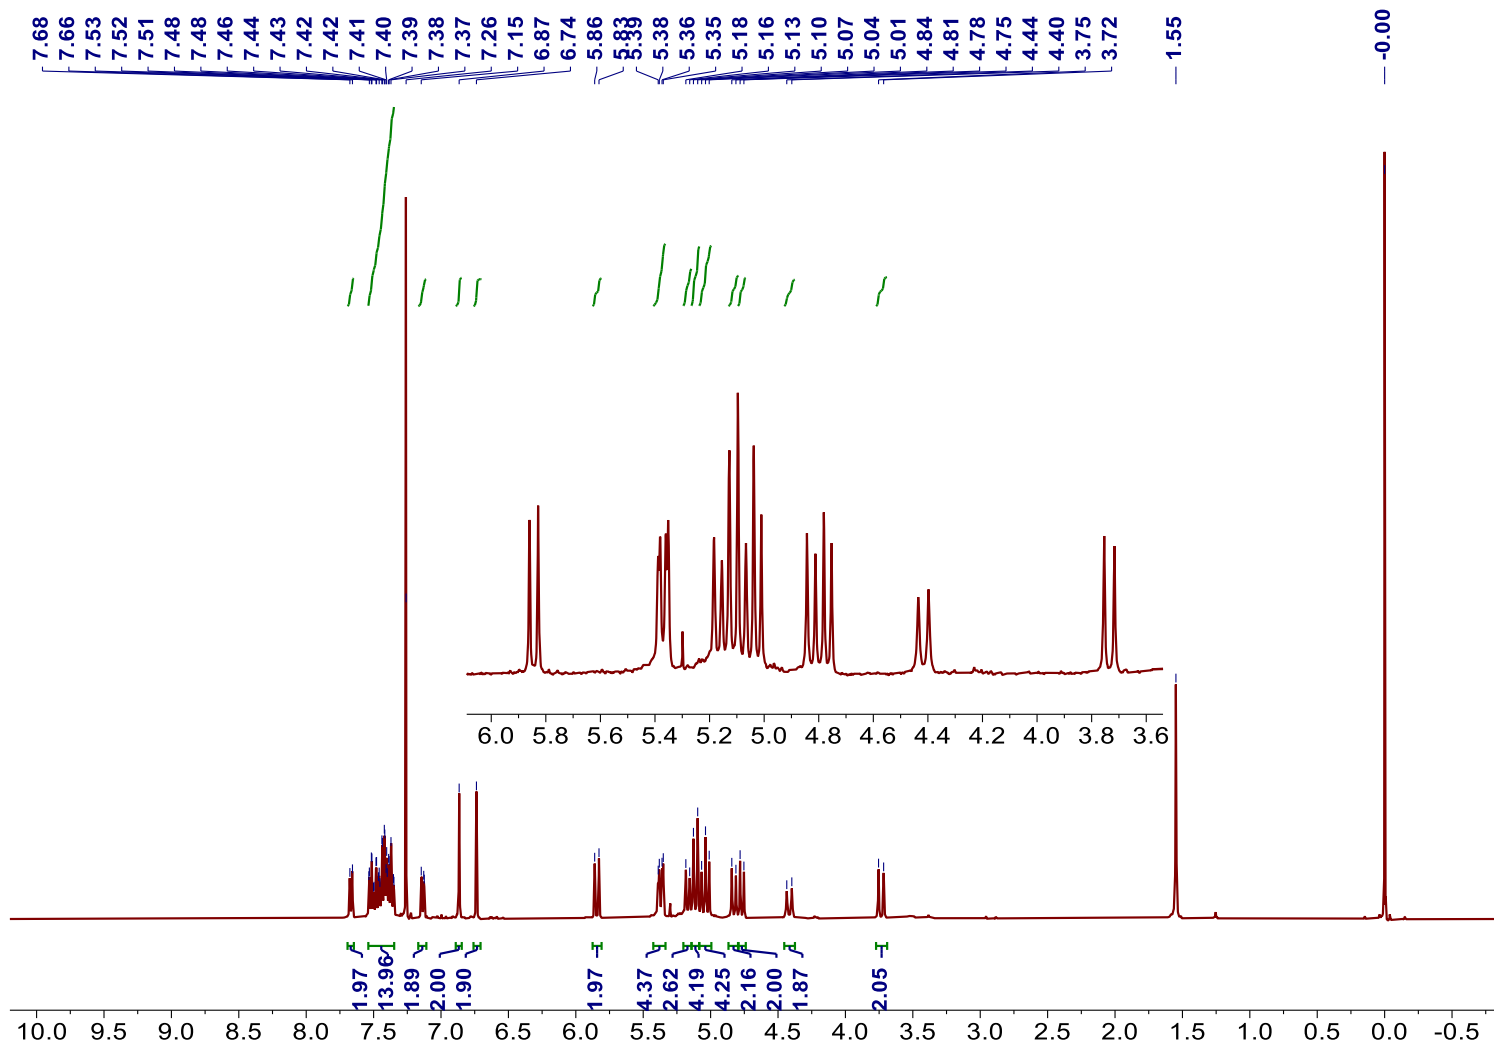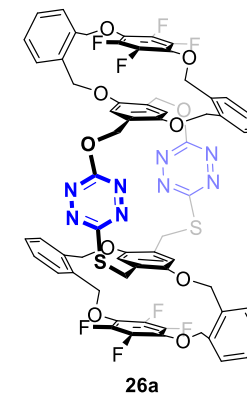

$^1\text{H NMR}$   
 $\text{CDCl}_3$

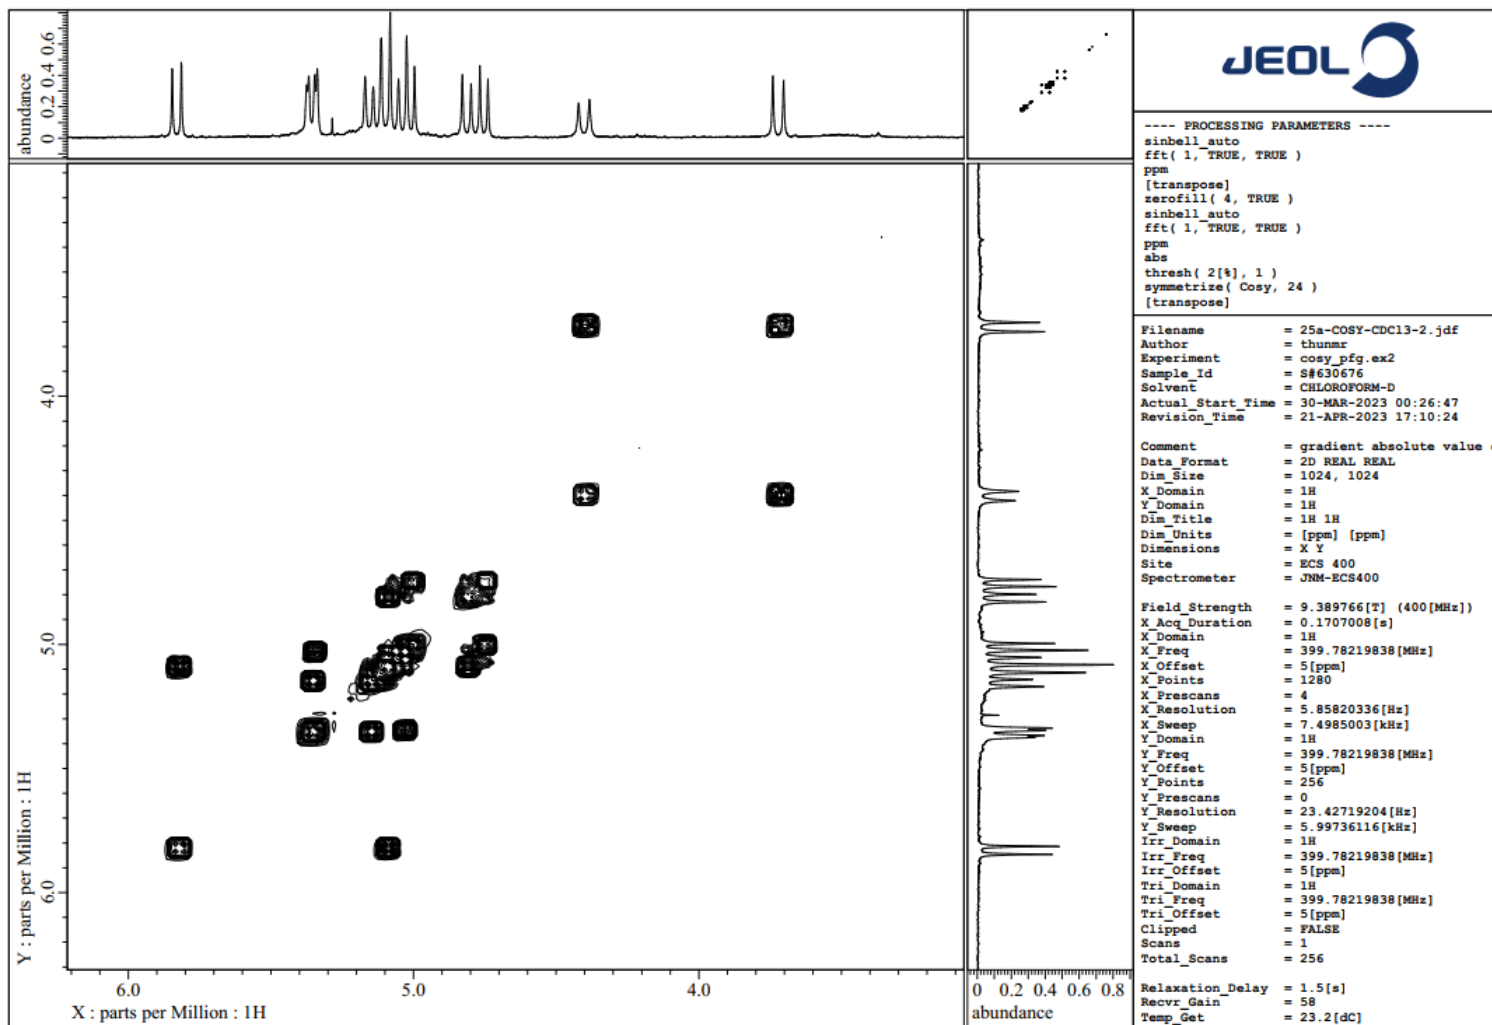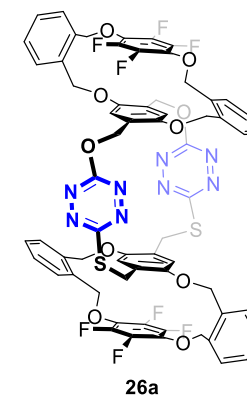

COSY  
CDCl<sub>3</sub>

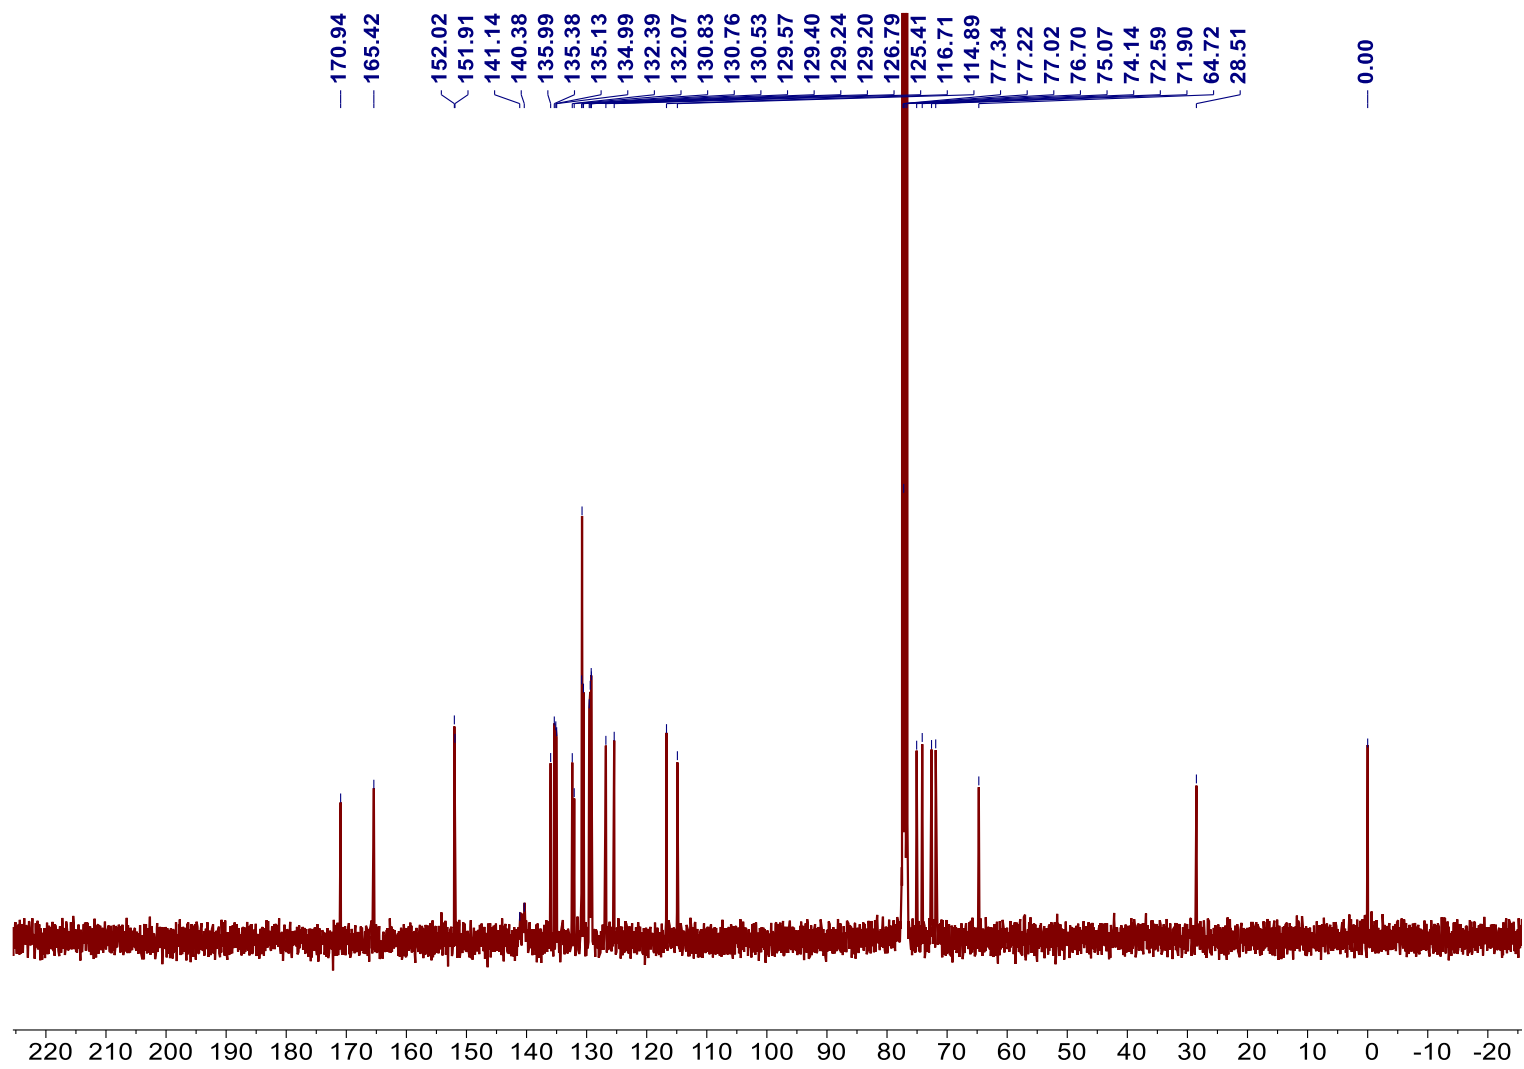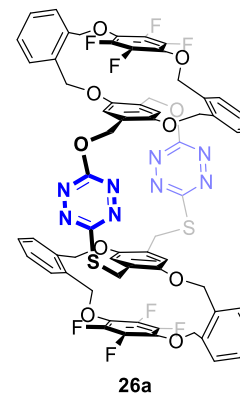

$^{13}\text{C}$ - $^{19}\text{F}$  Decoupled  
NMR  
 $\text{CDCl}_3$





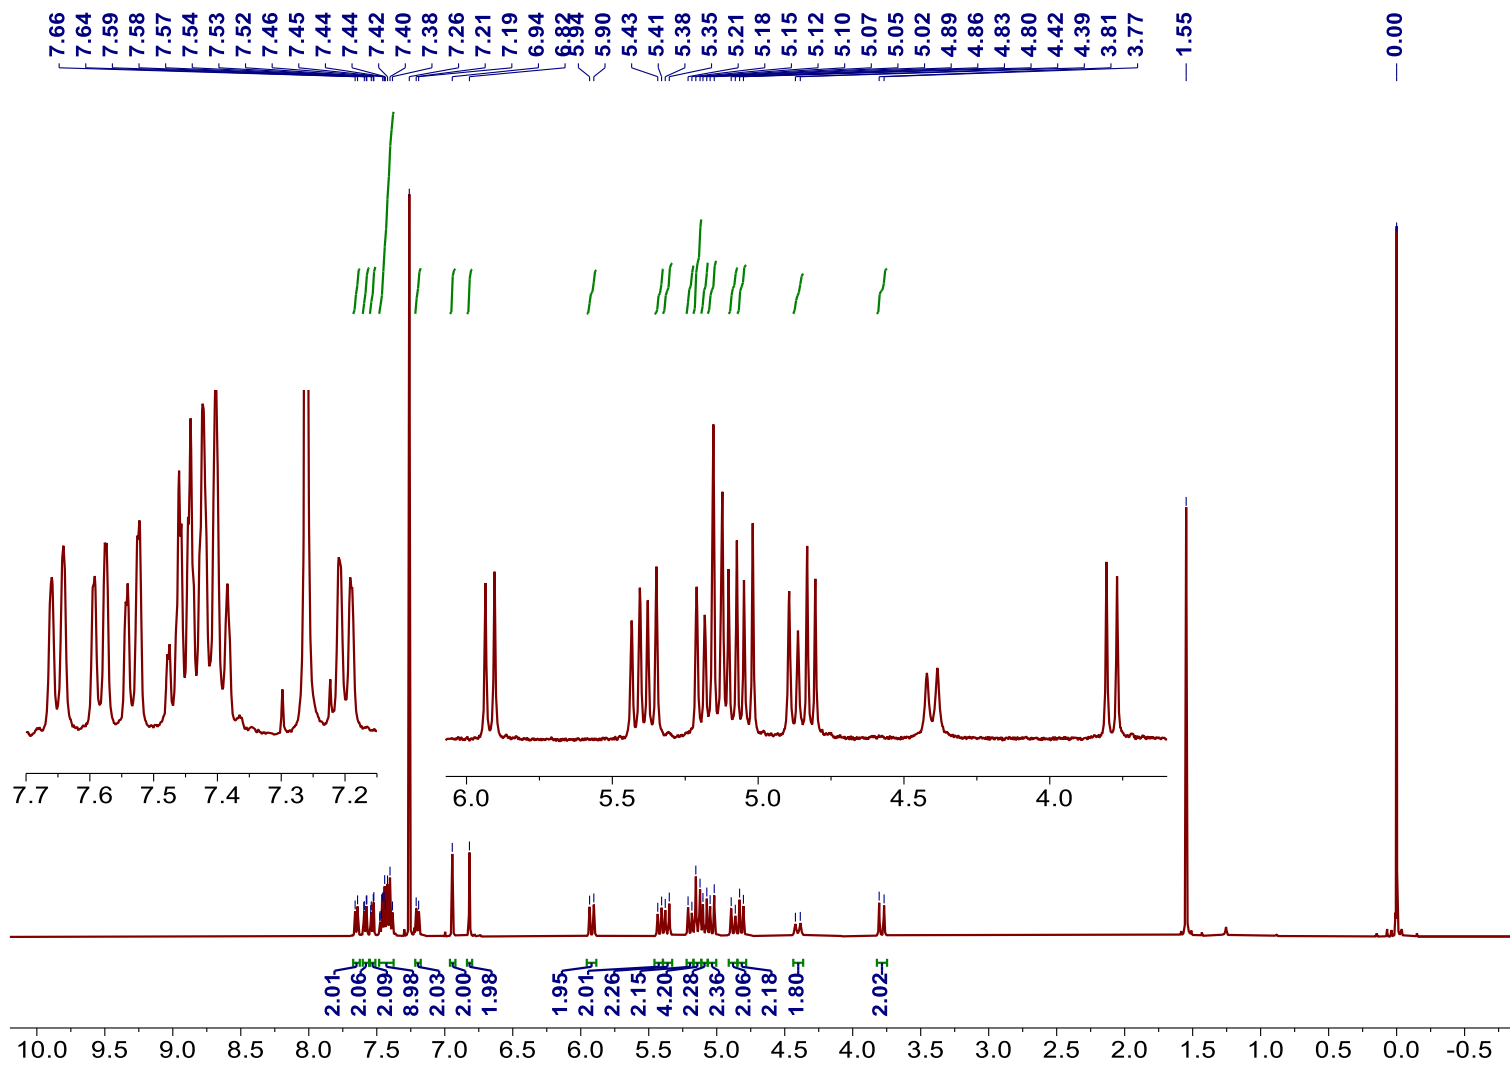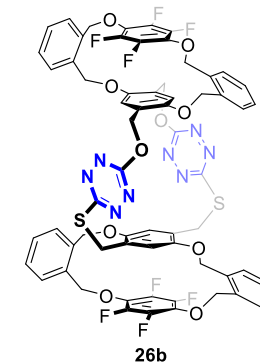

<sup>1</sup>H NMR  
CDCl<sub>3</sub>

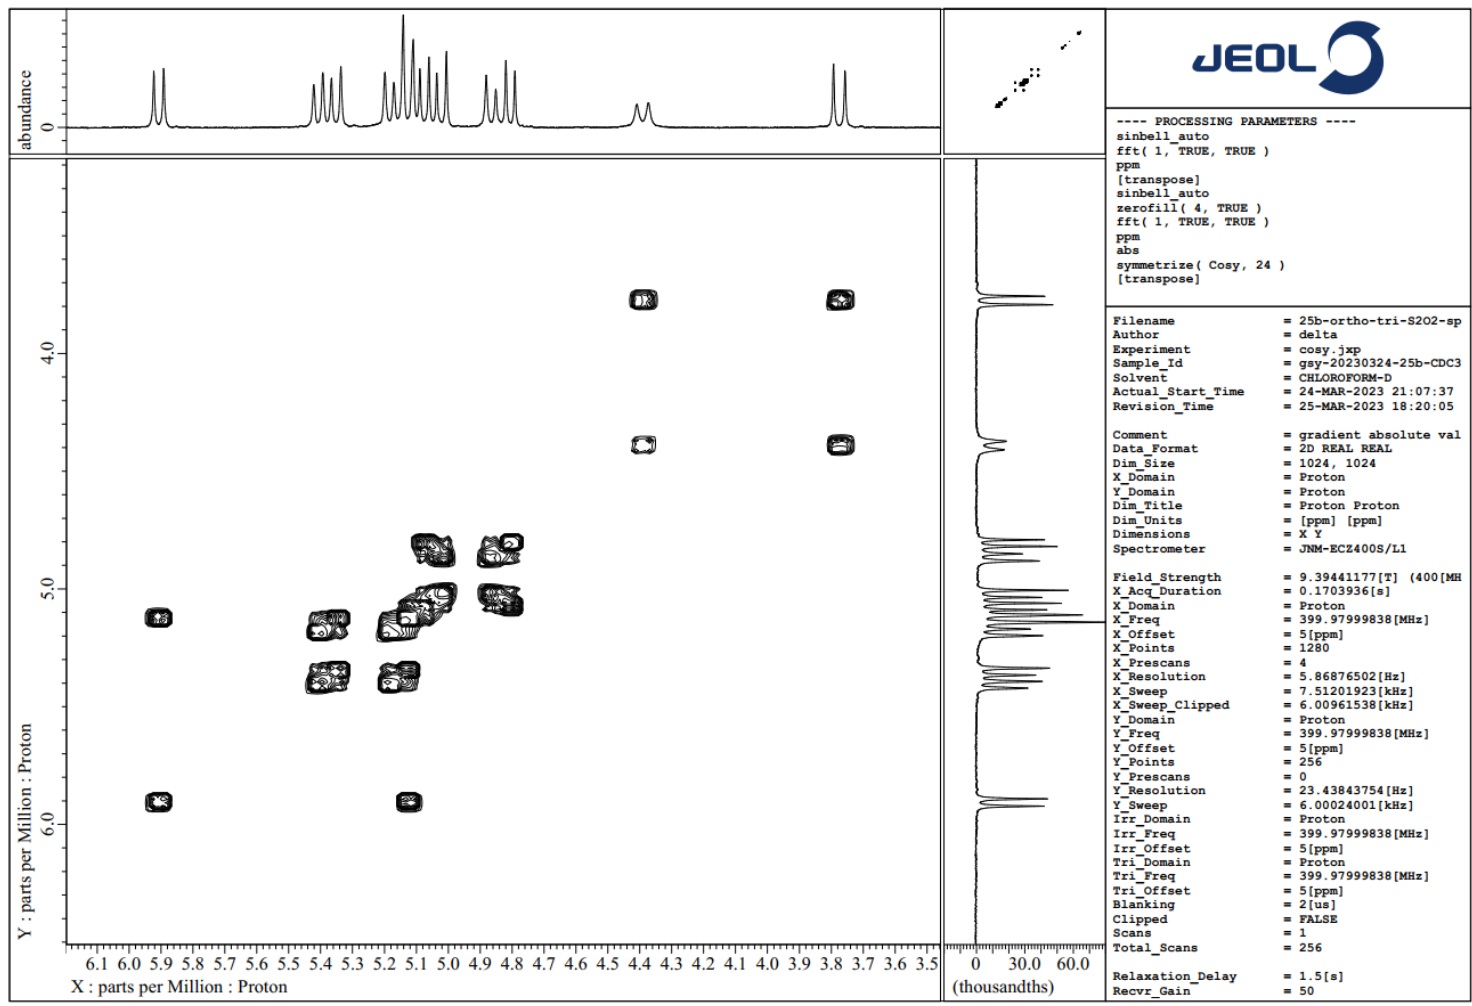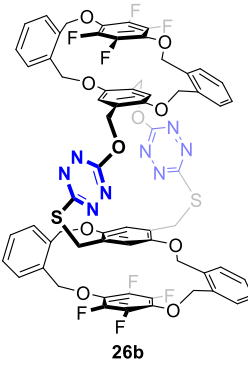

COSY

CDCl<sub>3</sub>

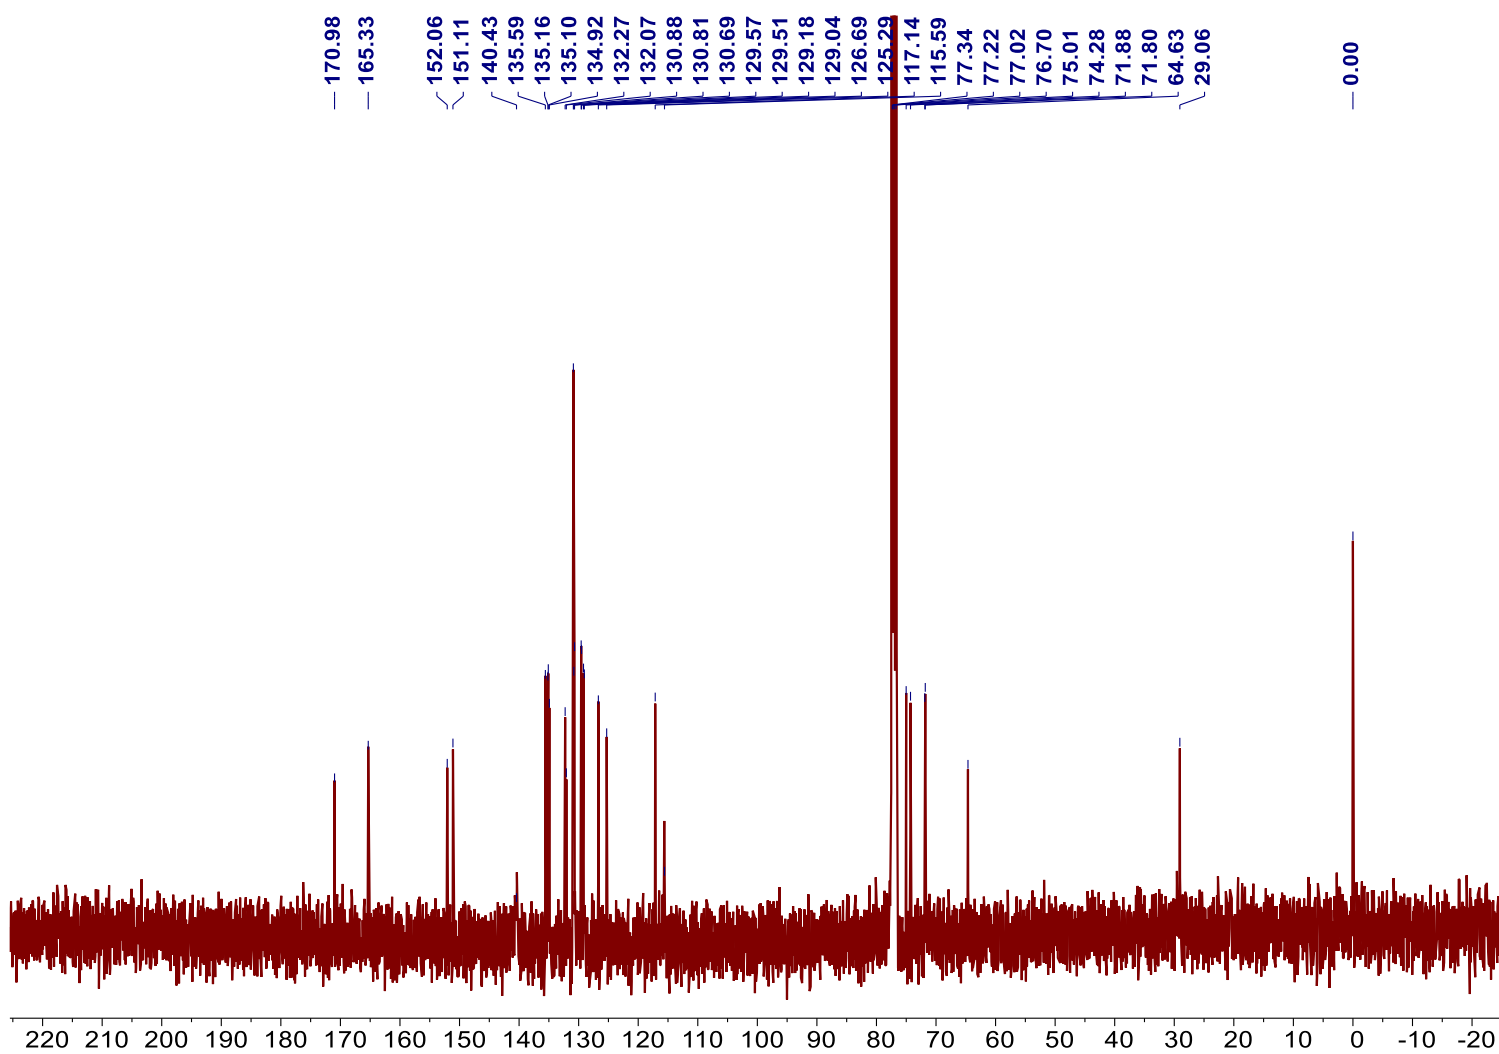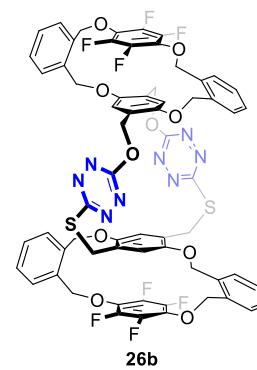

$^{13}\text{C}$ - $^{19}\text{F}$  decoupled  
NMR  
 $\text{CDCl}_3$

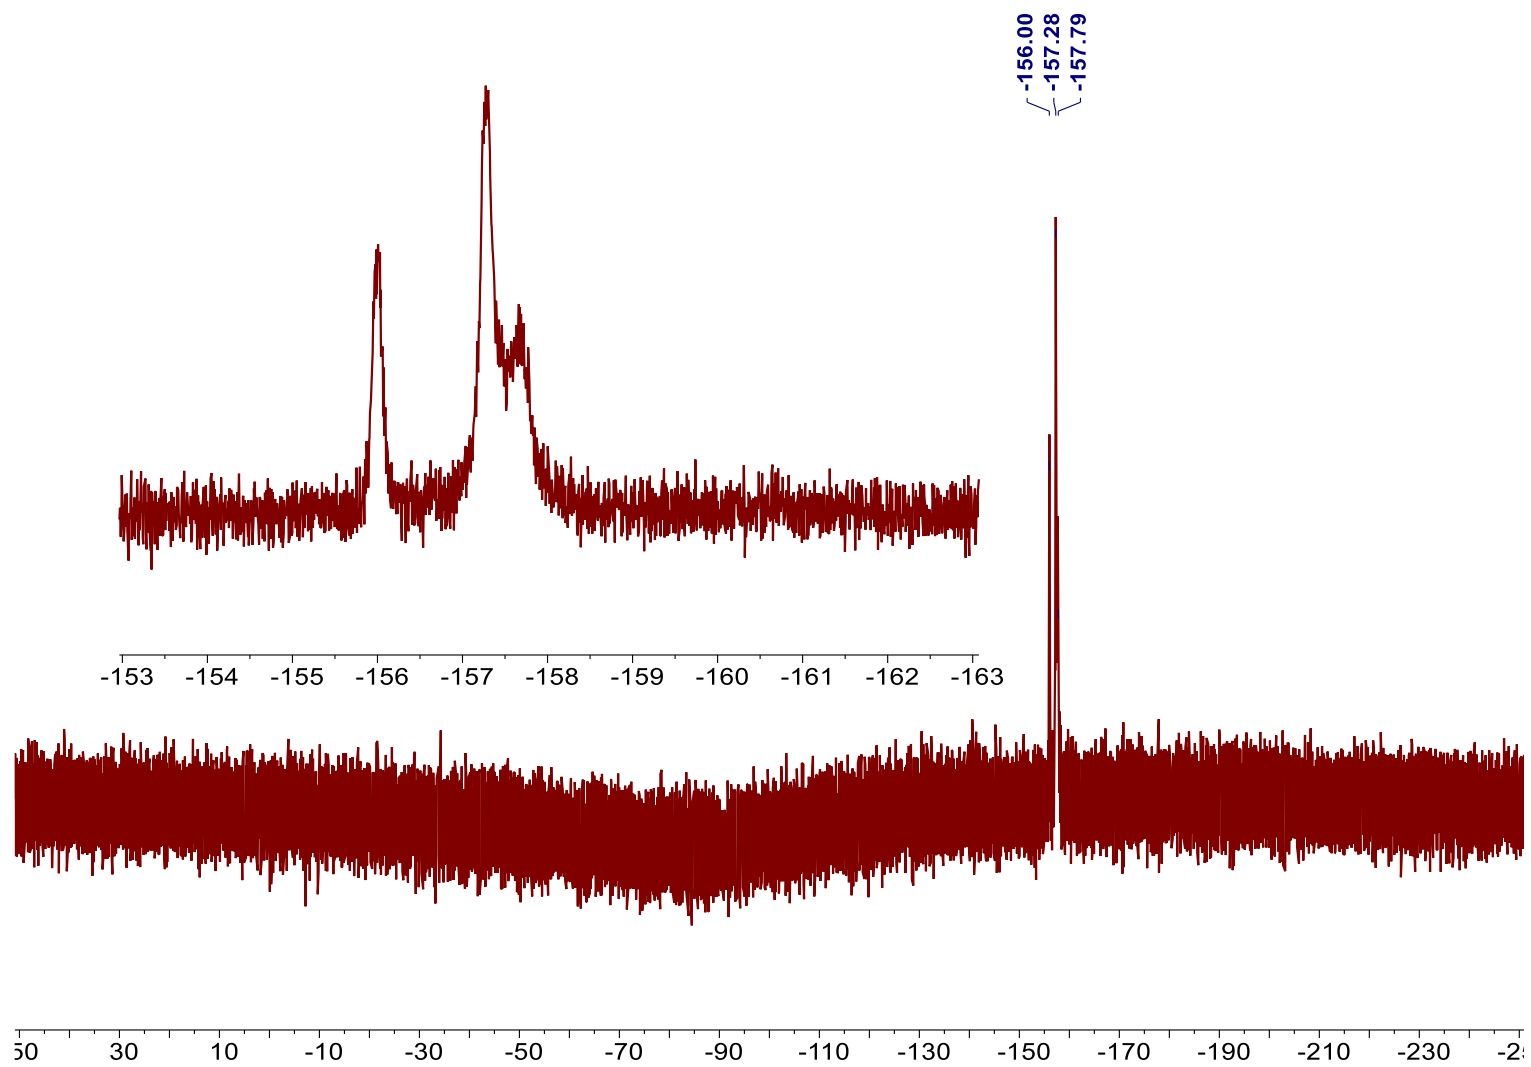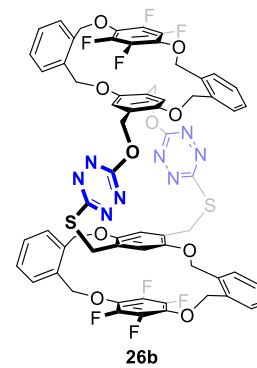

$^{19}\text{F}$  NMR

$\text{CDCl}_3$

S156
